# Supplementary material for: Comparative genome analysis of patulin-producing Penicillium paneum OM1 isolated from pears
Source: PeerJ journal article supplement (doi:10.7717/peerj.19848), 2025-08-22
Supplement: SupplementaryTableS1S2S3.docx [file SupplementaryTableS1S2S3.docx]

**Supplementary Tables**

**Table S1 Lengths of six contigs from the draft genome assembly for *P. paneum* OM1**

| **Contig number** | **Length (bp)** | **Coverage (x)** |
| --- | --- | --- |
| Contig_8 | 7,558,500 | 117 |
| Contig_6 | 7,466,314 | 118 |
| Contig_9 | 7,407,378 | 120 |
| Contig_10 | 4,666,820 | 119 |
| Contig_11 | 33,219 | 57 |
| Contig_14 | 27,875 | 854 |

**Table S2 Genome assembly data for *P. paneum* OM1**

| **Item** | **Number** |
| --- | --- |
| Contigs | 6 |
| Total bases (bp) | 27,160,106 |
| rRNA | 49 |
| 5S/5.8S rRNA | 41 |
| 18S rRNA | 4 |
| 28S rRNA | 4 |
| tRNA  Gene | 187  10,679 |
| mRNA | 10,679 |
| Exon | 33,118 |
| CDS | 10,679 |
| Functionally annotated gene | 7,136 |

**Notes.**

CDS, Coding sequence.

**Table S3 Detailed Gene Ontology (GO) classification of protein families in the genome of** ***P. paneum* OM1**

| **GO ID** | **Seq Num** | | **Seq List** | **GO term** | **Category** |
| --- | --- | --- | --- | --- | --- |
| GO:0034354 | 5 | gene_00551.t1,gene_02644.t1,gene_05407.t1,gene_04082.t1,gene_07394.t1 | | de novo' NAD biosynthetic process from tryptophan | biological_process |
| GO:0034356 | 1 | gene_10020.t1 | | NAD biosynthesis via nicotinamide riboside salvage pathway | biological_process |
| GO:0046348 | 2 | gene_08150.t1,gene_03440.t1 | | amino sugar catabolic process | biological_process |
| GO:0034198 | 1 | gene_05367.t1 | | cellular response to amino acid starvation | biological_process |
| GO:0034194 | 1 | gene_03435.t1 | | D-galactonate catabolic process | biological_process |
| GO:0006284 | 3 | gene_08282.t1,gene_07283.t1,gene_10200.t1 | | base-excision repair | biological_process |
| GO:0006285 | 5 | gene_06972.t1,gene_10562.t1,gene_00314.t1,gene_09479.t1,gene_04239.t1 | | base-excision repair, AP site formation | biological_process |
| GO:0006283 | 1 | gene_02748.t1 | | transcription-coupled nucleotide-excision repair | biological_process |
| GO:0006281 | 73 | gene_08299.t1,gene_06740.t1,gene_01043.t1,gene_06694.t1,gene_04254.t1,gene_03935.t1,gene_02387.t1,gene_10444.t1,gene_00391.t1,gene_00982.t1,gene_06073.t1,gene_04443.t1,gene_10167.t1,gene_07183.t1,gene_03774.t1,gene_10279.t1,gene_08500.t1,gene_03702.t1,gene_06517.t1,gene_07352.t1,gene_00682.t1,gene_01057.t1,gene_06102.t1,gene_08063.t1,gene_09184.t1,gene_07270.t1,gene_04166.t1,gene_05945.t1,gene_10093.t1,gene_08530.t1,gene_04631.t1,gene_08341.t1,gene_05141.t1,gene_01223.t1,gene_09572.t1,gene_03358.t1,gene_07377.t1,gene_05747.t1,gene_02787.t1,gene_09591.t1,gene_08474.t1,gene_10065.t1,gene_06255.t1,gene_02270.t1,gene_00455.t1,gene_10008.t1,gene_05805.t1,gene_05518.t1,gene_09891.t1,gene_01715.t1,gene_09781.t1,gene_06486.t1,gene_08475.t1,gene_08889.t1,gene_00415.t1,gene_07620.t1,gene_00274.t1,gene_00573.t1,gene_05677.t1,gene_08025.t1,gene_04352.t1,gene_08214.t1,gene_09206.t1,gene_03581.t1,gene_10557.t1,gene_00652.t1,gene_04176.t1,gene_07889.t1,gene_01877.t1,gene_08300.t1,gene_08999.t1,gene_03200.t1,gene_09044.t1 | | DNA repair | biological_process |
| GO:0045859 | 1 | gene_09602.t1 | | regulation of protein kinase activity | biological_process |
| GO:0006289 | 15 | gene_06477.t1,gene_07736.t1,gene_02617.t1,gene_04239.t1,gene_02228.t1,gene_09428.t1,gene_09214.t1,gene_07906.t1,gene_09119.t1,gene_01306.t1,gene_05871.t1,gene_04147.t1,gene_03712.t1,gene_10227.t1,gene_01504.t1 | | nucleotide-excision repair | biological_process |
| GO:0006570 | 1 | gene_03809.t1 | | tyrosine metabolic process | biological_process |
| GO:0006571 | 2 | gene_00560.t1,gene_05716.t1 | | tyrosine biosynthetic process | biological_process |
| GO:0006572 | 3 | gene_03807.t1,gene_10000.t1,gene_03810.t1 | | tyrosine catabolic process | biological_process |
| GO:0006370 | 2 | gene_09829.t1,gene_01488.t1 | | 7-methylguanosine mRNA capping | biological_process |
| GO:0006376 | 1 | gene_03867.t1 | | mRNA splice site selection | biological_process |

**Table S3 Detailed Gene Ontology (GO) classification of protein families in the genome of *P. paneum* OM1 (*Continued*)**

| **GO ID** | **Seq Num** | | **Seq List** | **GO term** | **Category** |
| --- | --- | --- | --- | --- | --- |
| GO:0006378 | 3 | gene_07762.t1,gene_03216.t1,gene_04188.t1 | | mRNA polyadenylation | biological_process |
| GO:0006379 | 6 | gene_03216.t1,gene_04188.t1,gene_01093.t1,gene_08067.t1,gene_05314.t1,gene_09823.t1 | | mRNA cleavage | biological_process |
| GO:0060261 | 1 | gene_01212.t1 | | positive regulation of transcription initiation from RNA polymerase II promoter | biological_process |
| GO:0006596 | 3 | gene_01399.t1,gene_08118.t1,gene_08820.t1 | | polyamine biosynthetic process | biological_process |
| GO:0006597 | 1 | gene_08168.t1 | | spermine biosynthetic process | biological_process |
| GO:0030497 | 1 | gene_06564.t1 | | fatty acid elongation | biological_process |
| GO:0061640 | 1 | gene_08241.t1 | | cytoskeleton-dependent cytokinesis | biological_process |
| GO:0035556 | 11 | gene_06053.t1,gene_08522.t1,gene_08790.t1,gene_08231.t1,gene_09815.t1,gene_03592.t1,gene_09378.t1,gene_07148.t1,gene_05820.t1,gene_07012.t1,gene_10560.t1 | | intracellular signal transduction | biological_process |
| GO:0046654 | 4 | gene_00474.t1,gene_07926.t1,gene_09639.t1,gene_01051.t1 | | tetrahydrofolate biosynthetic process | biological_process |
| GO:0035552 | 2 | gene_09114.t1,gene_01975.t1 | | oxidative single-stranded DNA demethylation | biological_process |
| GO:0046656 | 4 | gene_08648.t1,gene_00474.t1,gene_07926.t1,gene_09639.t1 | | folic acid biosynthetic process | biological_process |
| GO:0006116 | 3 | gene_09821.t1,gene_03273.t1,gene_02144.t1 | | NADH oxidation | biological_process |
| GO:0006113 | 1 | gene_03560.t1 | | fermentation | biological_process |
| GO:0006119 | 2 | gene_07269.t1,gene_09108.t1 | | oxidative phosphorylation | biological_process |
| GO:0006629 | 35 | gene_04078.t1,gene_06565.t1,gene_09304.t1,gene_04334.t1,gene_00377.t1,gene_10584.t1,gene_10630.t1,gene_05337.t1,gene_08888.t1,gene_08667.t1,gene_10013.t1,gene_06453.t1,gene_00933.t1,gene_06246.t1,gene_01039.t1,gene_02383.t1,gene_08056.t1,gene_03460.t1,gene_10194.t1,gene_07175.t1,gene_00238.t1,gene_05550.t1,gene_08491.t1,gene_02316.t1,gene_08969.t1,gene_00174.t1,gene_04437.t1,gene_06451.t1,gene_08627.t1,gene_08886.t1,gene_03250.t1,gene_00884.t1,gene_00957.t1,gene_00620.t1,gene_00969.t1 | | lipid metabolic process | biological_process |
| GO:0006625 | 2 | gene_00514.t1,gene_06332.t1 | | protein targeting to peroxisome | biological_process |
| GO:0006626 | 1 | gene_08866.t1 | | protein targeting to mitochondrion | biological_process |
| GO:0006627 | 1 | gene_09050.t1 | | protein processing involved in protein targeting to mitochondrion | biological_process |
| GO:0006621 | 2 | gene_04156.t1,gene_02784.t1 | | protein retention in ER lumen | biological_process |
| GO:0006623 | 3 | gene_03697.t1,gene_05682.t1,gene_01033.t1 | | protein targeting to vacuole | biological_process |

**Table S3 Detailed Gene Ontology (GO) classification of protein families in the genome of *P. paneum* OM1 (*Continued*)**

| **GO ID** | **Seq Num** | | **Seq List** | **GO term** | **Category** |
| --- | --- | --- | --- | --- | --- |
| GO:0009263 | 1 | gene_05781.t1 | | deoxyribonucleotide biosynthetic process | biological_process |
| GO:0070897 | 2 | gene_03056.t1,gene_03014.t1 | | transcription preinitiation complex assembly | biological_process |
| GO:0019856 | 1 | gene_01874.t1 | | pyrimidine nucleobase biosynthetic process | biological_process |
| GO:0006750 | 2 | gene_09056.t1,gene_09033.t1 | | glutathione biosynthetic process | biological_process |
| GO:0006751 | 3 | gene_03622.t1,gene_06808.t1,gene_08476.t1 | | glutathione catabolic process | biological_process |
| GO:0006021 | 3 | gene_05585.t1,gene_02349.t1,gene_00961.t1 | | inositol biosynthetic process | biological_process |
| GO:0051125 | 1 | gene_05327.t1 | | regulation of actin nucleation | biological_process |
| GO:0051123 | 1 | gene_08167.t1 | | RNA polymerase II preinitiation complex assembly | biological_process |
| GO:0051128 | 1 | gene_09833.t1 | | regulation of cellular component organization | biological_process |
| GO:0009395 | 2 | gene_02894.t1,gene_07645.t1 | | phospholipid catabolic process | biological_process |
| GO:0000288 | 1 | gene_03716.t1 | | nuclear-transcribed mRNA catabolic process, deadenylation-dependent decay | biological_process |
| GO:0000289 | 4 | gene_03654.t1,gene_06697.t1,gene_02175.t1,gene_07005.t1 | | nuclear-transcribed mRNA poly(A) tail shortening | biological_process |
| GO:0000280 | 1 | gene_04251.t1 | | nuclear division | biological_process |
| GO:0030705 | 1 | gene_04190.t1 | | cytoskeleton-dependent intracellular transport | biological_process |
| GO:0009094 | 2 | gene_09255.t1,gene_05716.t1 | | L-phenylalanine biosynthetic process | biological_process |
| GO:0051012 | 1 | gene_10487.t1 | | microtubule sliding | biological_process |
| GO:0051017 | 1 | gene_01209.t1 | | actin filament bundle assembly | biological_process |
| GO:0051014 | 1 | gene_02045.t1 | | actin filament severing | biological_process |
| GO:0006974 | 6 | gene_07640.t1,gene_01226.t1,gene_07321.t1,gene_10306.t1,gene_10392.t1,gene_04435.t1 | | cellular response to DNA damage stimulus | biological_process |
| GO:0048034 | 1 | gene_01447.t1 | | heme O biosynthetic process | biological_process |
| GO:0006979 | 10 | gene_03391.t1,gene_03751.t1,gene_02272.t1,gene_10014.t1,gene_05483.t1,gene_05839.t1,gene_03126.t1,gene_00621.t1,gene_00545.t1,gene_01284.t1 | | response to oxidative stress | biological_process |
| GO:0000750 | 1 | gene_01701.t1 | | pheromone-dependent signal transduction involved in conjugation with cellular fusion | biological_process |
| GO:0008608 | 7 | gene_10529.t1,gene_05877.t1,gene_03377.t1,gene_00873.t1,gene_08869.t1,gene_07276.t1,gene_03170.t1 | | attachment of spindle microtubules to kinetochore | biological_process |
| GO:0043631 | 1 | gene_01933.t1 | | RNA polyadenylation | biological_process |

**Table S3 Detailed Gene Ontology (GO) classification of protein families in the genome of *P. paneum* OM1 (*Continued*)**

| **GO ID** | **Seq Num** | | **Seq List** | **GO term** | **Category** |
| --- | --- | --- | --- | --- | --- |
| GO:0051301 | 48 | gene_08710.t1,gene_07793.t1,gene_03094.t1,gene_08597.t1,gene_07231.t1,gene_07822.t1,gene_05168.t1,gene_06720.t1,gene_09038.t1,gene_08798.t1,gene_05877.t1,gene_04228.t1,gene_02001.t1,gene_05995.t1,gene_06343.t1,gene_04724.t1,gene_10487.t1,gene_05155.t1,gene_09686.t1,gene_06154.t1,gene_07311.t1,gene_01875.t1,gene_08632.t1,gene_05897.t1,gene_02065.t1,gene_10291.t1,gene_05740.t1,gene_00422.t1,gene_03476.t1,gene_10063.t1,gene_08869.t1,gene_02992.t1,gene_07276.t1,gene_06879.t1,gene_09556.t1,gene_07202.t1,gene_03377.t1,gene_06062.t1,gene_05154.t1,gene_01007.t1,gene_02100.t1,gene_09773.t1,gene_09061.t1,gene_04201.t1,gene_07003.t1,gene_09833.t1,gene_09737.t1,gene_09787.t1 | | cell division | biological_process |
| GO:0019563 | 2 | gene_03977.t1,gene_10097.t1 | | glycerol catabolic process | biological_process |
| GO:0009439 | 1 | gene_06302.t1 | | cyanate metabolic process | biological_process |
| GO:0019551 | 1 | gene_09887.t1 | | glutamate catabolic process to 2-oxoglutarate | biological_process |
| GO:0070084 | 4 | gene_05363.t1,gene_00326.t1,gene_05364.t1,gene_02643.t1 | | protein initiator methionine removal | biological_process |
| GO:0070407 | 1 | gene_09415.t1 | | oxidation-dependent protein catabolic process | biological_process |
| GO:0030837 | 1 | gene_06364.t1 | | negative regulation of actin filament polymerization | biological_process |
| GO:0007163 | 1 | gene_09833.t1 | | establishment or maintenance of cell polarity | biological_process |
| GO:0007165 | 19 | gene_06374.t1,gene_01703.t1,gene_05579.t1,gene_09602.t1,gene_08179.t1,gene_07846.t1,gene_00965.t1,gene_10307.t1,gene_03243.t1,gene_00029.t1,gene_01175.t1,gene_05794.t1,gene_02689.t1,gene_09274.t1,gene_08510.t1,gene_05709.t1,gene_07449.t1,gene_02369.t1,gene_07240.t1 | | signal transduction | biological_process |
| GO:0007166 | 2 | gene_00670.t1,gene_04229.t1 | | cell surface receptor signaling pathway | biological_process |
| GO:0035835 | 1 | gene_02597.t1 | | indole alkaloid biosynthetic process | biological_process |
| GO:0071596 | 2 | gene_03997.t1,gene_03983.t1 | | ubiquitin-dependent protein catabolic process via the N-end rule pathway | biological_process |
| GO:0019988 | 1 | gene_04600.t1 | | charged-tRNA amino acid modification | biological_process |
| GO:0019985 | 1 | gene_06856.t1 | | translesion synthesis | biological_process |
| GO:0016567 | 6 | gene_06204.t1,gene_09212.t1,gene_02629.t1,gene_09472.t1,gene_03286.t1,gene_07422.t1 | | protein ubiquitination | biological_process |
| GO:0016560 | 3 | gene_07529.t1,gene_03938.t1,gene_08631.t1 | | protein import into peroxisome matrix, docking | biological_process |
| GO:1990456 | 1 | gene_06112.t1 | | mitochondrion-endoplasmic reticulum membrane tethering | biological_process |

**Table S3 Detailed Gene Ontology (GO) classification of protein families in the genome of *P. paneum* OM1 (*Continued*)**

| **GO ID** | **Seq Num** | | **Seq List** | **GO term** | **Category** |
| --- | --- | --- | --- | --- | --- |
| GO:0006298 | 11 | gene_00724.t1,gene_00723.t1,gene_03576.t1,gene_08513.t1,gene_01436.t1,gene_03237.t1,gene_07403.t1,gene_05849.t1,gene_09396.t1,gene_05619.t1,gene_00205.t1 | | mismatch repair | biological_process |
| GO:0046081 | 1 | gene_01001.t1 | | dUTP catabolic process | biological_process |
| GO:0006564 | 2 | gene_06831.t1,gene_09692.t1 | | L-serine biosynthetic process | biological_process |
| GO:0006562 | 3 | gene_03827.t1,gene_06401.t1,gene_02585.t1 | | proline catabolic process | biological_process |
| GO:0006561 | 3 | gene_01196.t1,gene_00851.t1,gene_01582.t1 | | proline biosynthetic process | biological_process |
| GO:0006569 | 4 | gene_00551.t1,gene_02644.t1,gene_04082.t1,gene_07394.t1 | | tryptophan catabolic process | biological_process |
| GO:0006360 | 2 | gene_02749.t1,gene_03180.t1 | | transcription by RNA polymerase I | biological_process |
| GO:0006364 | 59 | gene_09001.t1,gene_09857.t1,gene_04149.t1,gene_00407.t1,gene_06495.t1,gene_00676.t1,gene_09245.t1,gene_07034.t1,gene_02121.t1,gene_05674.t1,gene_00411.t1,gene_06516.t1,gene_09850.t1,gene_05954.t1,gene_03717.t1,gene_05136.t1,gene_07250.t1,gene_01651.t1,gene_02684.t1,gene_02479.t1,gene_07630.t1,gene_01602.t1,gene_10484.t1,gene_07171.t1,gene_09265.t1,gene_00904.t1,gene_06998.t1,gene_07039.t1,gene_06245.t1,gene_07935.t1,gene_03203.t1,gene_05450.t1,gene_06989.t1,gene_02353.t1,gene_00829.t1,gene_08812.t1,gene_04403.t1,gene_06280.t1,gene_10370.t1,gene_04396.t1,gene_02572.t1,gene_06557.t1,gene_10328.t1,gene_09290.t1,gene_02354.t1,gene_07329.t1,gene_09012.t1,gene_07075.t1,gene_02697.t1,gene_09567.t1,gene_07120.t1,gene_08535.t1,gene_10571.t1,gene_05225.t1,gene_00702.t1,gene_02183.t1,gene_08921.t1,gene_01055.t1,gene_09818.t1 | | rRNA processing | biological_process |
| GO:0006367 | 10 | gene_02334.t1,gene_00246.t1,gene_00093.t1,gene_00098.t1,gene_08169.t1,gene_09119.t1,gene_02099.t1,gene_10467.t1,gene_07906.t1,gene_01112.t1 | | transcription initiation from RNA polymerase II promoter | biological_process |
| GO:0006366 | 5 | gene_02207.t1,gene_07296.t1,gene_07314.t1,gene_02110.t1,gene_05228.t1 | | transcription by RNA polymerase II | biological_process |
| GO:0006369 | 1 | gene_04188.t1 | | termination of RNA polymerase II transcription | biological_process |
| GO:0006368 | 4 | gene_05205.t1,gene_01140.t1,gene_07013.t1,gene_00642.t1 | | transcription elongation from RNA polymerase II promoter | biological_process |
| GO:0007186 | 4 | gene_03006.t1,gene_01701.t1,gene_08745.t1,gene_06747.t1 | | G protein-coupled receptor signaling pathway | biological_process |
| GO:1904983 | 1 | gene_10133.t1 | | glycine import into mitochondrion | biological_process |
| GO:0006582 | 1 | gene_07943.t1 | | melanin metabolic process | biological_process |
| GO:0006913 | 2 | gene_05468.t1,gene_10558.t1 | | nucleocytoplasmic transport | biological_process |
| GO:0061077 | 1 | gene_02711.t1 | | chaperone-mediated protein folding | biological_process |
| GO:0042545 | 2 | gene_09474.t1,gene_06941.t1 | | cell wall modification | biological_process |

**Table S3 Detailed Gene Ontology (GO) classification of protein families in the genome of *P. paneum* OM1 (*Continued*)**

| **GO ID** | **Seq Num** | | **Seq List** | **GO term** | **Category** |
| --- | --- | --- | --- | --- | --- |
| GO:0009113 | 2 | gene_09629.t1,gene_09478.t1 | | purine nucleobase biosynthetic process | biological_process |
| GO:0042546 | 2 | gene_01195.t1,gene_09246.t1 | | cell wall biogenesis | biological_process |
| GO:0006106 | 1 | gene_00860.t1 | | fumarate metabolic process | biological_process |
| GO:0006101 | 1 | gene_04195.t1 | | citrate metabolic process | biological_process |
| GO:0006102 | 1 | gene_06798.t1 | | isocitrate metabolic process | biological_process |
| GO:0035494 | 1 | gene_08575.t1 | | SNARE complex disassembly | biological_process |
| GO:0006108 | 1 | gene_09160.t1 | | malate metabolic process | biological_process |
| GO:0006633 | 24 | gene_07489.t1,gene_02332.t1,gene_07895.t1,gene_02649.t1,gene_01127.t1,gene_06013.t1,gene_00004.t1,gene_00239.t1,gene_09894.t1,gene_09503.t1,gene_01074.t1,gene_09831.t1,gene_02860.t1,gene_08158.t1,gene_01270.t1,gene_05606.t1,gene_01892.t1,gene_05500.t1,gene_10275.t1,gene_04035.t1,gene_05302.t1,gene_00854.t1,gene_01824.t1,gene_00779.t1 | | fatty acid biosynthetic process | biological_process |
| GO:0006631 | 10 | gene_05973.t1,gene_01335.t1,gene_08900.t1,gene_06021.t1,gene_04772.t1,gene_08580.t1,gene_07063.t1,gene_09792.t1,gene_08826.t1,gene_04430.t1 | | fatty acid metabolic process | biological_process |
| GO:0006637 | 2 | gene_03283.t1,gene_01926.t1 | | acyl-CoA metabolic process | biological_process |
| GO:0006636 | 2 | gene_08991.t1,gene_09188.t1 | | unsaturated fatty acid biosynthetic process | biological_process |
| GO:0006635 | 1 | gene_01253.t1 | | fatty acid beta-oxidation | biological_process |
| GO:0006075 | 1 | gene_10302.t1 | | (1->3)-beta-D-glucan biosynthetic process | biological_process |
| GO:0009254 | 1 | gene_03840.t1 | | peptidoglycan turnover | biological_process |
| GO:0006450 | 2 | gene_03924.t1,gene_03313.t1 | | regulation of translational fidelity | biological_process |
| GO:0070887 | 3 | gene_03006.t1,gene_08745.t1,gene_06747.t1 | | cellular response to chemical stimulus | biological_process |
| GO:0009253 | 2 | gene_07692.t1,gene_01789.t1 | | peptidoglycan catabolic process | biological_process |
| GO:0006457 | 33 | gene_02559.t1,gene_04223.t1,gene_02160.t1,gene_09414.t1,gene_10136.t1,gene_08085.t1,gene_08963.t1,gene_10207.t1,gene_03193.t1,gene_03801.t1,gene_02695.t1,gene_00827.t1,gene_00425.t1,gene_09741.t1,gene_05558.t1,gene_09247.t1,gene_07139.t1,gene_03178.t1,gene_00502.t1,gene_01682.t1,gene_03945.t1,gene_01128.t1,gene_06426.t1,gene_06699.t1,gene_06458.t1,gene_01533.t1,gene_10423.t1,gene_03204.t1,gene_00737.t1,gene_00738.t1,gene_01918.t1,gene_04092.t1,gene_06242.t1 | | protein folding | biological_process |

**Table S3 Detailed Gene Ontology (GO) classification of protein families in the genome of *P. paneum* OM1 (*Continued*)**

| **GO ID** | **Seq Num** | | **Seq List** | **GO term** | **Category** |
| --- | --- | --- | --- | --- | --- |
| GO:0006749 | 25 | gene_10218.t1,gene_03811.t1,gene_06593.t1,gene_05410.t1,gene_04766.t1,gene_04103.t1,gene_04630.t1,gene_05731.t1,gene_06205.t1,gene_04798.t1,gene_07147.t1,gene_00802.t1,gene_08416.t1,gene_06600.t1,gene_04207.t1,gene_08466.t1,gene_08465.t1,gene_02054.t1,gene_03343.t1,gene_06575.t1,gene_06670.t1,gene_04292.t1,gene_03029.t1,gene_03077.t1,gene_09595.t1 | | glutathione metabolic process | biological_process |
| GO:0006031 | 5 | gene_10650.t1,gene_09106.t1,gene_00810.t1,gene_01290.t1,gene_07068.t1 | | chitin biosynthetic process | biological_process |
| GO:0006744 | 8 | gene_04044.t1,gene_10312.t1,gene_07066.t1,gene_03847.t1,gene_10412.t1,gene_07253.t1,gene_02653.t1,gene_09298.t1 | | ubiquinone biosynthetic process | biological_process |
| GO:0006458 | 1 | gene_09196.t1 | | 'de novo' protein folding | biological_process |
| GO:0008033 | 26 | gene_03682.t1,gene_08067.t1,gene_09407.t1,gene_05152.t1,gene_02357.t1,gene_04329.t1,gene_01368.t1,gene_04011.t1,gene_09006.t1,gene_09193.t1,gene_07641.t1,gene_06444.t1,gene_06051.t1,gene_06778.t1,gene_04234.t1,gene_08528.t1,gene_08685.t1,gene_06070.t1,gene_05831.t1,gene_02587.t1,gene_09703.t1,gene_09034.t1,gene_07483.t1,gene_06158.t1,gene_07407.t1,gene_01719.t1 | | tRNA processing | biological_process |
| GO:0098703 | 1 | gene_09233.t1 | | calcium ion import across plasma membrane | biological_process |
| GO:0018342 | 2 | gene_01380.t1,gene_09347.t1 | | protein prenylation | biological_process |
| GO:0000290 | 4 | gene_04547.t1,gene_09855.t1,gene_08394.t1,gene_05772.t1 | | deadenylation-dependent decapping of nuclear-transcribed mRNA | biological_process |
| GO:0043936 | 1 | gene_04192.t1 | | asexual sporulation resulting in formation of a cellular spore | biological_process |
| GO:0009100 | 3 | gene_10012.t1,gene_00090.t1,gene_08478.t1 | | glycoprotein metabolic process | biological_process |
| GO:0000742 | 1 | gene_03884.t1 | | karyogamy involved in conjugation with cellular fusion | biological_process |
| GO:0030071 | 5 | gene_07822.t1,gene_09747.t1,gene_02850.t1,gene_02001.t1,gene_04135.t1 | | regulation of mitotic metaphase/anaphase transition | biological_process |
| GO:0001732 | 13 | gene_00144.t1,gene_01700.t1,gene_00555.t1,gene_01354.t1,gene_06008.t1,gene_02418.t1,gene_05226.t1,gene_05697.t1,gene_00493.t1,gene_05408.t1,gene_03188.t1,gene_06800.t1,gene_00720.t1 | | formation of cytoplasmic translation initiation complex | biological_process |
| GO:0008299 | 6 | gene_02693.t1,gene_07274.t1,gene_08799.t1,gene_09133.t1,gene_06520.t1,gene_07555.t1 | | isoprenoid biosynthetic process | biological_process |
| GO:0008295 | 1 | gene_08168.t1 | | spermidine biosynthetic process | biological_process |
| GO:0019222 | 1 | gene_08032.t1 | | regulation of metabolic process | biological_process |
| GO:0016998 | 2 | gene_07692.t1,gene_01789.t1 | | cell wall macromolecule catabolic process | biological_process |
| GO:0019427 | 1 | gene_10043.t1 | | acetyl-CoA biosynthetic process from acetate | biological_process |

**Table S3 Detailed Gene Ontology (GO) classification of protein families in the genome of *P. paneum* OM1 (*Continued*)**

| **GO ID** | **Seq Num** | | **Seq List** | **GO term** | **Category** |
| --- | --- | --- | --- | --- | --- |
| GO:0000162 | 3 | gene_10196.t1,gene_08809.t1,gene_10271.t1 | | tryptophan biosynthetic process | biological_process |
| GO:0072659 | 1 | gene_09077.t1 | | protein localization to plasma membrane | biological_process |
| GO:1904382 | 1 | gene_08332.t1 | | mannose trimming involved in glycoprotein ERAD pathway | biological_process |
| GO:0016197 | 4 | gene_10315.t1,gene_03887.t1,gene_02853.t1,gene_02540.t1 | | endosomal transport | biological_process |
| GO:1901564 | 2 | gene_02953.t1,gene_08690.t1 | | organonitrogen compound metabolic process | biological_process |
| GO:0016192 | 43 | gene_02180.t1,gene_10007.t1,gene_03697.t1,gene_06397.t1,gene_03526.t1,gene_03667.t1,gene_09677.t1,gene_03375.t1,gene_02436.t1,gene_08919.t1,gene_04030.t1,gene_10348.t1,gene_06937.t1,gene_08390.t1,gene_05895.t1,gene_00582.t1,gene_02646.t1,gene_09165.t1,gene_01549.t1,gene_06756.t1,gene_06536.t1,gene_05682.t1,gene_01668.t1,gene_07017.t1,gene_03659.t1,gene_03142.t1,gene_00619.t1,gene_07361.t1,gene_03925.t1,gene_04059.t1,gene_03371.t1,gene_09159.t1,gene_01372.t1,gene_08040.t1,gene_09042.t1,gene_00350.t1,gene_02725.t1,gene_00554.t1,gene_10130.t1,gene_06752.t1,gene_04061.t1,gene_04715.t1,gene_05343.t1 | | vesicle-mediated transport | biological_process |
| GO:1901566 | 4 | gene_01185.t1,gene_09470.t1,gene_04024.t1,gene_03022.t1 | | organonitrogen compound biosynthetic process | biological_process |
| GO:0008277 | 1 | gene_05795.t1 | | regulation of G protein-coupled receptor signaling pathway | biological_process |
| GO:0045490 | 5 | gene_00523.t1,gene_09475.t1,gene_09474.t1,gene_00787.t1,gene_06941.t1 | | pectin catabolic process | biological_process |
| GO:0033674 | 1 | gene_01161.t1 | | positive regulation of kinase activity | biological_process |
| GO:0043547 | 2 | gene_09563.t1,gene_01246.t1 | | positive regulation of GTPase activity | biological_process |
| GO:0062197 | 1 | gene_03326.t1 | | cellular response to chemical stress | biological_process |
| GO:0016575 | 3 | gene_07896.t1,gene_05188.t1,gene_07577.t1 | | histone deacetylation | biological_process |
| GO:0016570 | 5 | gene_05205.t1,gene_10407.t1,gene_07013.t1,gene_00642.t1,gene_09239.t1 | | histone modification | biological_process |
| GO:0016573 | 4 | gene_07183.t1,gene_07837.t1,gene_05665.t1,gene_07471.t1 | | histone acetylation | biological_process |
| GO:0016572 | 1 | gene_08500.t1 | | histone phosphorylation | biological_process |
| GO:0045727 | 2 | gene_05458.t1,gene_09037.t1 | | positive regulation of translation | biological_process |
| GO:0016579 | 17 | gene_03666.t1,gene_06133.t1,gene_03039.t1,gene_00409.t1,gene_10416.t1,gene_08038.t1,gene_01114.t1,gene_03470.t1,gene_07313.t1,gene_07732.t1,gene_08301.t1,gene_04184.t1,gene_07916.t1,gene_02020.t1,gene_00843.t1,gene_10317.t1,gene_04108.t1 | | protein deubiquitination | biological_process |
| GO:1990116 | 1 | gene_02227.t1 | | ribosome-associated ubiquitin-dependent protein catabolic process | biological_process |

**Table S3 Detailed Gene Ontology (GO) classification of protein families in the genome of *P. paneum* OM1 (*Continued*)**

| **GO ID** | **Seq Num** | | **Seq List** | **GO term** | **Category** |
| --- | --- | --- | --- | --- | --- |
| GO:0006355 | 38 | gene_09775.t1,gene_04084.t1,gene_03744.t1,gene_01942.t1,gene_07005.t1,gene_02804.t1,gene_09239.t1,gene_09220.t1,gene_05796.t1,gene_10047.t1,gene_02910.t1,gene_08023.t1,gene_07331.t1,gene_02393.t1,gene_08721.t1,gene_03205.t1,gene_07759.t1,gene_09848.t1,gene_10003.t1,gene_05373.t1,gene_10140.t1,gene_05871.t1,gene_01792.t1,gene_04049.t1,gene_02373.t1,gene_10443.t1,gene_01316.t1,gene_03901.t1,gene_02703.t1,gene_00833.t1,gene_10024.t1,gene_09322.t1,gene_09052.t1,gene_06697.t1,gene_01526.t1,gene_09828.t1,gene_03799.t1,gene_00599.t1 | | regulation of transcription, DNA-templated | biological_process |
| GO:0006357 | 31 | gene_01481.t1,gene_09638.t1,gene_02427.t1,gene_03418.t1,gene_04102.t1,gene_03195.t1,gene_04586.t1,gene_08286.t1,gene_10618.t1,gene_06207.t1,gene_07235.t1,gene_09400.t1,gene_04459.t1,gene_08654.t1,gene_01050.t1,gene_00109.t1,gene_03579.t1,gene_10253.t1,gene_03677.t1,gene_09599.t1,gene_02513.t1,gene_02542.t1,gene_04057.t1,gene_00906.t1,gene_01449.t1,gene_05943.t1,gene_00985.t1,gene_07678.t1,gene_04147.t1,gene_09082.t1,gene_00580.t1 | | regulation of transcription by RNA polymerase II | biological_process |
| GO:0006351 | 216 | gene_10517.t1,gene_02526.t1,gene_09809.t1,gene_00286.t1,gene_05810.t1,gene_06585.t1,gene_05301.t1,gene_09897.t1,gene_04650.t1,gene_07166.t1,gene_04378.t1,gene_01987.t1,gene_10227.t1,gene_07583.t1,gene_08694.t1,gene_07085.t1,gene_05373.t1,gene_09036.t1,gene_08824.t1,gene_09192.t1,gene_02977.t1,gene_06059.t1,gene_05808.t1,gene_05311.t1,gene_07128.t1,gene_06936.t1,gene_00556.t1,gene_07284.t1,gene_02170.t1,gene_10058.t1,gene_06732.t1,gene_03295.t1,gene_06020.t1,gene_08281.t1,gene_06963.t1,gene_04045.t1,gene_04445.t1,gene_01145.t1,gene_06978.t1,gene_02915.t1,gene_03544.t1,gene_06394.t1,gene_02194.t1,gene_09814.t1,gene_09944.t1,gene_05588.t1,gene_02808.t1,gene_05121.t1,gene_04669.t1,gene_03050.t1,gene_09460.t1,gene_02847.t1,gene_06532.t1,gene_02034.t1,gene_03831.t1,gene_07827.t1,gene_01153.t1,gene_04481.t1,gene_07168.t1,gene_09590.t1,gene_01809.t1,gene_08041.t1,gene_10237.t1,gene_06852.t1,gene_02605.t1,gene_05540.t1,gene_04524.t1,gene_10056.t1,gene_03366.t1,gene_07677.t1,gene_00564.t1,gene_06949.t1,gene_05277.t1,gene_04081.t1,gene_00677.t1,gene_04356.t1,gene_06614.t1,gene_06402.t1,gene_03132.t1,gene_03951.t1,gene_07693.t1,gene_10254.t1,gene_01612.t1,gene_06171.t1,gene_02809.t1,gene_10553.t1,gene_05992.t1,gene_01922.t1,gene_05736.t1,gene_04208.t1,gene_01937.t1,gene_01345.t1,gene_06266.t1,gene_04028.t1,gene_10663.t1,gene_04473.t1,gene_08441.t1,gene_07955.t1,gene_06230.t1,gene_09646.t1,gene_08638.t1,gene_10051.t1,gene_07992.t1,gene_07948.t1,gene_00689.t1, | | transcription, DNA-templated | biological_process |

**Table S3 Detailed Gene Ontology (GO) classification of protein families in the genome of *P. paneum* OM1 (*Continued*)**

| **GO ID** | **Seq Num** | | **Seq List** | **GO term** | **Category** |
| --- | --- | --- | --- | --- | --- |
| GO:0006351 | 216 | gene_01535.t1,gene_01135.t1,gene_07382.t1,gene_00395.t1,gene_03770.t1,gene_09652.t1,gene_02580.t1,gene_09375.t1,gene_02652.t1,gene_05080.t1,gene_08254.t1,gene_04515.t1,gene_02916.t1,gene_10255.t1,gene_04594.t1,gene_08833.t1,gene_04621.t1,gene_08947.t1,gene_04732.t1,gene_02874.t1,gene_06934.t1,gene_02607.t1,gene_01756.t1,gene_01742.t1,gene_06249.t1,gene_08569.t1,gene_03655.t1,gene_01093.t1,gene_02050.t1,gene_10083.t1,gene_08139.t1,gene_05314.t1,gene_10374.t1,gene_06023.t1,gene_09656.t1,gene_01498.t1,gene_07548.t1,gene_02512.t1,gene_01262.t1,gene_02608.t1,gene_08304.t1,gene_04352.t1,gene_01529.t1,gene_00747.t1,gene_04647.t1,gene_06377.t1,gene_01359.t1,gene_07785.t1,gene_03869.t1,gene_01613.t1,gene_10197.t1,gene_04147.t1,gene_00228.t1,gene_08148.t1,gene_09823.t1,gene_09813.t1,gene_04304.t1,gene_09330.t1,gene_01857.t1,gene_08034.t1,gene_10666.t1,gene_08280.t1,gene_06823.t1,gene_05070.t1,gene_02068.t1,gene_02086.t1,gene_01606.t1,gene_01134.t1,gene_05477.t1,gene_01708.t1,gene_06766.t1,gene_04651.t1,gene_08479.t1,gene_07726.t1,gene_00654.t1,gene_05087.t1,gene_10172.t1,gene_05814.t1,gene_05721.t1,gene_00770.t1,gene_03408.t1,gene_09612.t1,gene_10205.t1,gene_03870.t1,gene_03107.t1,gene_02230.t1,gene_08062.t1,gene_04209.t1,gene_02677.t1,gene_09748.t1,gene_03842.t1,gene_09126.t1,gene_03748.t1,gene_04643.t1,gene_04307.t1,gene_04203.t1,gene_10649.t1,gene_07241.t1,gene_06172.t1,gene_03596.t1,gene_01530.t1,gene_05972.t1,gene_03866.t1,gene_01696.t1,gene_00634.t1,gene_00018.t1,gene_01954.t1,gene_02730.t1,gene_09697.t1,gene_00968.t1,gene_07525.t1 | | transcription, DNA-templated | biological_process |
| GO:0006352 | 8 | gene_06623.t1,gene_07165.t1,gene_08353.t1,gene_02242.t1,gene_02119.t1,gene_05884.t1,gene_05962.t1,gene_08645.t1 | | DNA-templated transcription, initiation | biological_process |
| GO:0006353 | 1 | gene_02253.t1 | | DNA-templated transcription, termination | biological_process |
| GO:0046417 | 2 | gene_08154.t1,gene_05716.t1 | | chorismate metabolic process | biological_process |
| GO:0046416 | 6 | gene_07698.t1,gene_06144.t1,gene_05946.t1,gene_10150.t1,gene_05244.t1,gene_02986.t1 | | D-amino acid metabolic process | biological_process |
| GO:0009264 | 2 | gene_10518.t1,gene_06835.t1 | | deoxyribonucleotide catabolic process | biological_process |
| GO:0035023 | 1 | gene_00958.t1 | | regulation of Rho protein signal transduction | biological_process |
| GO:0002100 | 1 | gene_02973.t1 | | tRNA wobble adenosine to inosine editing | biological_process |
| GO:0043161 | 8 | gene_08488.t1,gene_00399.t1,gene_09250.t1,gene_06474.t1,gene_01630.t1,gene_09214.t1,gene_07038.t1,gene_00843.t1 | | proteasome-mediated ubiquitin-dependent protein catabolic process | biological_process |

**Table S3 Detailed Gene Ontology (GO) classification of protein families in the genome of *P. paneum* OM1 (*Continued*)**

| **GO ID** | **Seq Num** | | **Seq List** | **GO term** | **Category** |
| --- | --- | --- | --- | --- | --- |
| GO:0030091 | 1 | gene_03751.t1 | | protein repair | biological_process |
| GO:0016233 | 1 | gene_02492.t1 | | telomere capping | biological_process |
| GO:0006646 | 4 | gene_09062.t1,gene_10329.t1,gene_02006.t1,gene_09295.t1 | | phosphatidylethanolamine biosynthetic process | biological_process |
| GO:0006644 | 5 | gene_03496.t1,gene_02872.t1,gene_00809.t1,gene_07679.t1,gene_05347.t1 | | phospholipid metabolic process | biological_process |
| GO:0006641 | 3 | gene_05193.t1,gene_01671.t1,gene_01468.t1 | | triglyceride metabolic process | biological_process |
| GO:0000350 | 1 | gene_08218.t1 | | generation of catalytic spliceosome for second transesterification step | biological_process |
| GO:0030490 | 1 | gene_06649.t1 | | maturation of SSU-rRNA | biological_process |
| GO:0006006 | 2 | gene_07758.t1,gene_06816.t1 | | glucose metabolic process | biological_process |
| GO:0006007 | 1 | gene_03194.t1 | | glucose catabolic process | biological_process |
| GO:0006000 | 3 | gene_09166.t1,gene_09708.t1,gene_04120.t1 | | fructose metabolic process | biological_process |
| GO:0006002 | 1 | gene_03414.t1 | | fructose 6-phosphate metabolic process | biological_process |
| GO:0006003 | 3 | gene_09166.t1,gene_09708.t1,gene_04120.t1 | | fructose 2,6-bisphosphate metabolic process | biological_process |
| GO:0106035 | 1 | gene_09749.t1 | | protein maturation by [4Fe-4S] cluster transfer | biological_process |
| GO:0018293 | 1 | gene_10389.t1 | | protein-FAD linkage | biological_process |
| GO:0006914 | 18 | gene_00063.t1,gene_08294.t1,gene_03474.t1,gene_03697.t1,gene_10308.t1,gene_07531.t1,gene_02759.t1,gene_02838.t1,gene_03179.t1,gene_04192.t1,gene_07354.t1,gene_00981.t1,gene_03468.t1,gene_08284.t1,gene_08177.t1,gene_03031.t1,gene_09511.t1,gene_07033.t1 | | autophagy | biological_process |
| GO:0006915 | 5 | gene_10601.t1,gene_09087.t1,gene_10559.t1,gene_05140.t1,gene_02560.t1 | | apoptotic process | biological_process |
| GO:0018298 | 3 | gene_03901.t1,gene_01792.t1,gene_00746.t1 | | protein-chromophore linkage | biological_process |
| GO:0009117 | 5 | gene_09266.t1,gene_03413.t1,gene_01718.t1,gene_09581.t1,gene_07475.t1 | | nucleotide metabolic process | biological_process |
| GO:0009116 | 22 | gene_04965.t1,gene_00772.t1,gene_10016.t1,gene_09819.t1,gene_09719.t1,gene_02018.t1,gene_07520.t1,gene_00164.t1,gene_09276.t1,gene_04495.t1,gene_08132.t1,gene_00083.t1,gene_01248.t1,gene_07023.t1,gene_09154.t1,gene_05063.t1,gene_06265.t1,gene_08377.t1,gene_04964.t1,gene_09009.t1,gene_04496.t1,gene_09478.t1 | | nucleoside metabolic process | biological_process |
| GO:0018343 | 1 | gene_04040.t1 | | protein farnesylation | biological_process |
| GO:0018344 | 2 | gene_09996.t1,gene_08511.t1 | | protein geranylgeranylation | biological_process |
| GO:0018345 | 1 | gene_00203.t1 | | protein palmitoylation | biological_process |

**Table S3 Detailed Gene Ontology (GO) classification of protein families in the genome of *P. paneum* OM1 (*Continued*)**

| **GO ID** | **Seq Num** | | **Seq List** | **GO term** | **Category** |
| --- | --- | --- | --- | --- | --- |
| GO:0045122 | 1 | gene_02151.t1 | | aflatoxin biosynthetic process | biological_process |
| GO:0000467 | 1 | gene_03242.t1 | | exonucleolytic trimming to generate mature 3'-end of 5.8S rRNA from tricistronic rRNA transcript (SSU-rRNA, 5.8S rRNA, LSU-rRNA) | biological_process |
| GO:0006821 | 3 | gene_07629.t1,gene_08410.t1,gene_01052.t1 | | chloride transport | biological_process |
| GO:0006826 | 7 | gene_10564.t1,gene_00830.t1,gene_07511.t1,gene_00797.t1,gene_07124.t1,gene_01257.t1,gene_03078.t1 | | iron ion transport | biological_process |
| GO:0019509 | 4 | gene_02356.t1,gene_10424.t1,gene_09578.t1,gene_03822.t1 | | L-methionine salvage from methylthioadenosine | biological_process |
| GO:0070647 | 21 | gene_05613.t1,gene_09181.t1,gene_10462.t1,gene_01082.t1,gene_07267.t1,gene_04412.t1,gene_06971.t1,gene_00028.t1,gene_03888.t1,gene_00857.t1,gene_08586.t1,gene_07985.t1,gene_09107.t1,gene_01241.t1,gene_03532.t1,gene_03042.t1,gene_00616.t1,gene_01971.t1,gene_06292.t1,gene_10182.t1,gene_07286.t1 | | protein modification by small protein conjugation or removal | biological_process |
| GO:0019500 | 1 | gene_02921.t1 | | cyanide catabolic process | biological_process |
| GO:0061982 | 6 | gene_08889.t1,gene_00205.t1,gene_10607.t1,gene_03576.t1,gene_09184.t1,gene_05849.t1 | | meiosis I cell cycle process | biological_process |
| GO:0032933 | 1 | gene_07125.t1 | | SREBP signaling pathway | biological_process |
| GO:0019722 | 2 | gene_03950.t1,gene_04058.t1 | | calcium-mediated signaling | biological_process |
| GO:0019346 | 5 | gene_07328.t1,gene_01259.t1,gene_04701.t1,gene_04197.t1,gene_05961.t1 | | transsulfuration | biological_process |
| GO:0019432 | 2 | gene_01120.t1,gene_07365.t1 | | triglyceride biosynthetic process | biological_process |
| GO:0019343 | 1 | gene_01192.t1 | | cysteine biosynthetic process via cystathionine | biological_process |
| GO:0019439 | 4 | gene_02569.t1,gene_09653.t1,gene_06959.t1,gene_02177.t1 | | aromatic compound catabolic process | biological_process |
| GO:0019348 | 2 | gene_00979.t1,gene_02943.t1 | | dolichol metabolic process | biological_process |
| GO:0043420 | 4 | gene_00551.t1,gene_02644.t1,gene_04082.t1,gene_07394.t1 | | anthranilate metabolic process | biological_process |
| GO:1901576 | 3 | gene_07849.t1,gene_05257.t1,gene_04763.t1 | | organic substance biosynthetic process | biological_process |
| GO:0019430 | 1 | gene_10408.t1 | | removal of superoxide radicals | biological_process |
| GO:0019344 | 1 | gene_07261.t1 | | cysteine biosynthetic process | biological_process |
| GO:0019236 | 2 | gene_09242.t1,gene_03660.t1 | | response to pheromone | biological_process |
| GO:0033609 | 3 | gene_00147.t1,gene_06408.t1,gene_00074.t1 | | oxalate metabolic process | biological_process |
| GO:0042147 | 7 | gene_07863.t1,gene_06774.t1,gene_03468.t1,gene_08974.t1,gene_06399.t1,gene_08108.t1,gene_08590.t1 | | retrograde transport, endosome to Golgi | biological_process |

**Table S3 Detailed Gene Ontology (GO) classification of protein families in the genome of *P. paneum* OM1 (*Continued*)**

| **GO ID** | **Seq Num** | | **Seq List** | **GO term** | **Category** |
| --- | --- | --- | --- | --- | --- |
| GO:0042149 | 1 | gene_02850.t1 | | cellular response to glucose starvation | biological_process |
| GO:0016540 | 2 | gene_09062.t1,gene_02006.t1 | | protein autoprocessing | biological_process |
| GO:0033567 | 1 | gene_10167.t1 | | DNA replication, Okazaki fragment processing | biological_process |
| GO:0140053 | 1 | gene_06331.t1 | | mitochondrial gene expression | biological_process |
| GO:0030261 | 1 | gene_07003.t1 | | chromosome condensation | biological_process |
| GO:0043087 | 4 | gene_02689.t1,gene_03243.t1,gene_09729.t1,gene_10307.t1 | | regulation of GTPase activity | biological_process |
| GO:0043086 | 1 | gene_09968.t1 | | negative regulation of catalytic activity | biological_process |
| GO:0043085 | 1 | gene_04547.t1 | | positive regulation of catalytic activity | biological_process |
| GO:1901605 | 1 | gene_09263.t1 | | alpha-amino acid metabolic process | biological_process |
| GO:0030004 | 1 | gene_06398.t1 | | cellular monovalent inorganic cation homeostasis | biological_process |
| GO:0030007 | 2 | gene_06654.t1,gene_07810.t1 | | cellular potassium ion homeostasis | biological_process |
| GO:0001100 | 1 | gene_04154.t1 | | negative regulation of exit from mitosis | biological_process |
| GO:0006123 | 4 | gene_00354.t1,gene_08418.t1,gene_02781.t1,gene_08159.t1 | | mitochondrial electron transport, cytochrome c to oxygen | biological_process |
| GO:0006122 | 4 | gene_10111.t1,gene_00585.t1,gene_08819.t1,gene_03982.t1 | | mitochondrial electron transport, ubiquinol to cytochrome c | biological_process |
| GO:0006121 | 1 | gene_10389.t1 | | mitochondrial electron transport, succinate to ubiquinone | biological_process |
| GO:0043170 | 3 | gene_05779.t1,gene_05468.t1,gene_10246.t1 | | macromolecule metabolic process | biological_process |
| GO:0006556 | 2 | gene_05535.t1,gene_07806.t1 | | S-adenosylmethionine biosynthetic process | biological_process |
| GO:0006557 | 1 | gene_08168.t1 | | S-adenosylmethioninamine biosynthetic process | biological_process |
| GO:0006654 | 1 | gene_09152.t1 | | phosphatidic acid biosynthetic process | biological_process |
| GO:0000184 | 6 | gene_04284.t1,gene_08813.t1,gene_05772.t1,gene_07933.t1,gene_01856.t1,gene_07305.t1 | | nuclear-transcribed mRNA catabolic process, nonsense-mediated decay | biological_process |
| GO:0046386 | 2 | gene_10518.t1,gene_06835.t1 | | deoxyribose phosphate catabolic process | biological_process |
| GO:0006659 | 1 | gene_10329.t1 | | phosphatidylserine biosynthetic process | biological_process |
| GO:0009231 | 6 | gene_01228.t1,gene_00125.t1,gene_08770.t1,gene_02362.t1,gene_10466.t1,gene_07127.t1 | | riboflavin biosynthetic process | biological_process |
| GO:0006499 | 1 | gene_01408.t1 | | N-terminal protein myristoylation | biological_process |
| GO:0030488 | 3 | gene_02659.t1,gene_01679.t1,gene_07742.t1 | | tRNA methylation | biological_process |
| GO:0046281 | 2 | gene_10373.t1,gene_00631.t1 | | cinnamic acid catabolic process | biological_process |
| GO:0006013 | 3 | gene_07184.t1,gene_09875.t1,gene_00838.t1 | | mannose metabolic process | biological_process |

**Table S3 Detailed Gene Ontology (GO) classification of protein families in the genome of *P. paneum* OM1 (*Continued*)**

| **GO ID** | **Seq Num** | | **Seq List** | **GO term** | **Category** |
| --- | --- | --- | --- | --- | --- |
| GO:0006012 | 2 | gene_08393.t1,gene_08593.t1 | | galactose metabolic process | biological_process |
| GO:0006011 | 1 | gene_04652.t1 | | UDP-glucose metabolic process | biological_process |
| GO:0006015 | 2 | gene_10016.t1,gene_09154.t1 | | 5-phosphoribose 1-diphosphate biosynthetic process | biological_process |
| GO:0009584 | 2 | gene_03901.t1,gene_01792.t1 | | detection of visible light | biological_process |
| GO:0048193 | 4 | gene_07961.t1,gene_08532.t1,gene_08887.t1,gene_09729.t1 | | Golgi vesicle transport | biological_process |
| GO:0051016 | 1 | gene_07685.t1 | | barbed-end actin filament capping | biological_process |
| GO:0042773 | 1 | gene_04152.t1 | | ATP synthesis coupled electron transport | biological_process |
| GO:0045002 | 1 | gene_00330.t1 | | double-strand break repair via single-strand annealing | biological_process |
| GO:0048280 | 1 | gene_02252.t1 | | vesicle fusion with Golgi apparatus | biological_process |
| GO:0048288 | 1 | gene_03884.t1 | | nuclear membrane fusion involved in karyogamy | biological_process |
| GO:0006904 | 2 | gene_09722.t1,gene_04572.t1 | | vesicle docking involved in exocytosis | biological_process |
| GO:0009166 | 2 | gene_02326.t1,gene_10644.t1 | | nucleotide catabolic process | biological_process |
| GO:0048268 | 1 | gene_02601.t1 | | clathrin coat assembly | biological_process |
| GO:0009165 | 3 | gene_10016.t1,gene_09009.t1,gene_09154.t1 | | nucleotide biosynthetic process | biological_process |
| GO:0044281 | 11 | gene_00061.t1,gene_08935.t1,gene_00062.t1,gene_09604.t1,gene_03860.t1,gene_07145.t1,gene_10050.t1,gene_00212.t1,gene_08940.t1,gene_09405.t1,gene_00522.t1 | | small molecule metabolic process | biological_process |
| GO:0044283 | 2 | gene_04620.t1,gene_07600.t1 | | small molecule biosynthetic process | biological_process |
| GO:0000244 | 1 | gene_05450.t1 | | spliceosomal tri-snRNP complex assembly | biological_process |
| GO:0044255 | 8 | gene_09714.t1,gene_06616.t1,gene_05956.t1,gene_07976.t1,gene_09463.t1,gene_05622.t1,gene_01218.t1,gene_04514.t1 | | cellular lipid metabolic process | biological_process |
| GO:0009168 | 1 | gene_01718.t1 | | purine ribonucleoside monophosphate biosynthetic process | biological_process |
| GO:0000160 | 5 | gene_00398.t1,gene_04615.t1,gene_07882.t1,gene_00017.t1,gene_04034.t1 | | phosphorelay signal transduction system | biological_process |
| GO:0045132 | 2 | gene_07290.t1,gene_05154.t1 | | meiotic chromosome segregation | biological_process |
| GO:0006839 | 1 | gene_03943.t1 | | mitochondrial transport | biological_process |
| GO:0070940 | 2 | gene_05704.t1,gene_00538.t1 | | dephosphorylation of RNA polymerase II C-terminal domain | biological_process |
| GO:0070987 | 4 | gene_03610.t1,gene_10061.t1,gene_08006.t1,gene_04737.t1 | | error-free translesion synthesis | biological_process |
| GO:0051225 | 2 | gene_09991.t1,gene_10291.t1 | | spindle assembly | biological_process |
| GO:0016973 | 5 | gene_01628.t1,gene_10642.t1,gene_10643.t1,gene_05611.t1,gene_07129.t1 | | poly(A)+ mRNA export from nucleus | biological_process |

**Table S3 Detailed Gene Ontology (GO) classification of protein families in the genome of *P. paneum* OM1 (*Continued*)**

| **GO ID** | **Seq Num** | | **Seq List** | **GO term** | **Category** |
| --- | --- | --- | --- | --- | --- |
| GO:0035999 | 5 | gene_01168.t1,gene_07024.t1,gene_06799.t1,gene_07886.t1,gene_03196.t1 | | tetrahydrofolate interconversion | biological_process |
| GO:0007232 | 1 | gene_01278.t1 | | osmosensory signaling pathway via Sho1 osmosensor | biological_process |
| GO:0001682 | 6 | gene_06449.t1,gene_00840.t1,gene_10169.t1,gene_03157.t1,gene_01748.t1,gene_05910.t1 | | tRNA 5'-leader removal | biological_process |
| GO:0046856 | 5 | gene_07363.t1,gene_04510.t1,gene_06333.t1,gene_07789.t1,gene_04548.t1 | | phosphatidylinositol dephosphorylation | biological_process |
| GO:0046855 | 4 | gene_01292.t1,gene_05585.t1,gene_02349.t1,gene_03882.t1 | | inositol phosphate dephosphorylation | biological_process |
| GO:0046854 | 4 | gene_05585.t1,gene_02349.t1,gene_03882.t1,gene_07371.t1 | | phosphatidylinositol phosphate biosynthetic process | biological_process |
| GO:0042823 | 2 | gene_04580.t1,gene_01088.t1 | | pyridoxal phosphate biosynthetic process | biological_process |
| GO:0032259 | 64 | gene_09715.t1,gene_07369.t1,gene_03543.t1,gene_04324.t1,gene_05187.t1,gene_09600.t1,gene_03686.t1,gene_00786.t1,gene_02875.t1,gene_05570.t1,gene_06238.t1,gene_00044.t1,gene_01127.t1,gene_06694.t1,gene_02208.t1,gene_10340.t1,gene_01301.t1,gene_03669.t1,gene_00239.t1,gene_05279.t1,gene_05786.t1,gene_01676.t1,gene_06837.t1,gene_05115.t1,gene_08025.t1,gene_03477.t1,gene_01784.t1,gene_09477.t1,gene_04497.t1,gene_02225.t1,gene_07039.t1,gene_00382.t1,gene_03090.t1,gene_01168.t1,gene_02625.t1,gene_01715.t1,gene_10027.t1,gene_04278.t1,gene_02161.t1,gene_07850.t1,gene_03196.t1,gene_01783.t1,gene_06497.t1,gene_07963.t1,gene_03847.t1,gene_00180.t1,gene_00612.t1,gene_00334.t1,gene_05606.t1,gene_03441.t1,gene_06478.t1,gene_05302.t1,gene_03893.t1,gene_04453.t1,gene_00854.t1,gene_04044.t1,gene_01287.t1,gene_01824.t1,gene_10674.t1,gene_02183.t1,gene_00606.t1,gene_03309.t1,gene_03168.t1,gene_10501.t1 | | methylation | biological_process |
| GO:0019408 | 2 | gene_05126.t1,gene_10116.t1 | | dolichol biosynthetic process | biological_process |
| GO:0043410 | 1 | gene_03887.t1 | | positive regulation of MAPK cascade | biological_process |
| GO:0043414 | 1 | gene_09851.t1 | | macromolecule methylation | biological_process |
| GO:0043419 | 1 | gene_01624.t1 | | urea catabolic process | biological_process |
| GO:0006783 | 2 | gene_04538.t1,gene_09989.t1 | | heme biosynthetic process | biological_process |
| GO:0071586 | 2 | gene_09674.t1,gene_00418.t1 | | CAAX-box protein processing | biological_process |
| GO:0019243 | 1 | gene_08534.t1 | | methylglyoxal catabolic process to D-lactate via S-lactoyl-glutathione | biological_process |
| GO:0033615 | 1 | gene_01561.t1 | | mitochondrial proton-transporting ATP synthase complex assembly | biological_process |
| GO:0033617 | 5 | gene_00454.t1,gene_09558.t1,gene_05977.t1,gene_03201.t1,gene_09301.t1 | | mitochondrial cytochrome c oxidase assembly | biological_process |

**Table S3 Detailed Gene Ontology (GO) classification of protein families in the genome of *P. paneum* OM1 (*Continued*)**

| **GO ID** | **Seq Num** | | **Seq List** | **GO term** | **Category** |
| --- | --- | --- | --- | --- | --- |
| GO:0072583 | 1 | gene_01313.t1 | | clathrin-dependent endocytosis | biological_process |
| GO:0042176 | 3 | gene_07275.t1,gene_05847.t1,gene_01479.t1 | | regulation of protein catabolic process | biological_process |
| GO:0016559 | 3 | gene_06344.t1,gene_03732.t1,gene_07686.t1 | | peroxisome fission | biological_process |
| GO:0016558 | 2 | gene_01977.t1,gene_05844.t1 | | protein import into peroxisome matrix | biological_process |
| GO:0034553 | 1 | gene_03687.t1 | | mitochondrial respiratory chain complex II assembly | biological_process |
| GO:0071765 | 1 | gene_02440.t1 | | nuclear inner membrane organization | biological_process |
| GO:0046279 | 1 | gene_05589.t1 | | 3,4-dihydroxybenzoate biosynthetic process | biological_process |
| GO:0030259 | 5 | gene_03179.t1,gene_00199.t1,gene_03481.t1,gene_07845.t1,gene_07540.t1 | | lipid glycosylation | biological_process |
| GO:0006338 | 20 | gene_09453.t1,gene_10296.t1,gene_07303.t1,gene_08700.t1,gene_04352.t1,gene_09736.t1,gene_00643.t1,gene_06866.t1,gene_03376.t1,gene_08699.t1,gene_06320.t1,gene_08995.t1,gene_08351.t1,gene_09322.t1,gene_03937.t1,gene_07314.t1,gene_05457.t1,gene_01333.t1,gene_00391.t1,gene_03800.t1 | | chromatin remodeling | biological_process |
| GO:0006336 | 1 | gene_03047.t1 | | DNA replication-independent chromatin assembly | biological_process |
| GO:0006334 | 6 | gene_02242.t1,gene_07282.t1,gene_05665.t1,gene_07960.t1,gene_09268.t1,gene_03509.t1 | | nucleosome assembly | biological_process |
| GO:0006335 | 1 | gene_02594.t1 | | DNA replication-dependent chromatin assembly | biological_process |
| GO:0006078 | 2 | gene_01195.t1,gene_06043.t1 | | (1->6)-beta-D-glucan biosynthetic process | biological_process |
| GO:0006172 | 2 | gene_04186.t1,gene_01019.t1 | | ADP biosynthetic process | biological_process |
| GO:0046475 | 2 | gene_05869.t1,gene_05485.t1 | | glycerophospholipid catabolic process | biological_process |
| GO:0046470 | 1 | gene_03380.t1 | | phosphatidylcholine metabolic process | biological_process |
| GO:0006879 | 1 | gene_09989.t1 | | cellular iron ion homeostasis | biological_process |
| GO:0030036 | 5 | gene_10315.t1,gene_06638.t1,gene_02045.t1,gene_10032.t1,gene_09686.t1 | | actin cytoskeleton organization | biological_process |
| GO:0002128 | 1 | gene_03856.t1 | | tRNA nucleoside ribose methylation | biological_process |
| GO:0006480 | 1 | gene_06086.t1 | | N-terminal protein amino acid methylation | biological_process |
| GO:0051304 | 1 | gene_07172.t1 | | chromosome separation | biological_process |
| GO:0006486 | 25 | gene_05724.t1,gene_04055.t1,gene_09608.t1,gene_10310.t1,gene_08604.t1,gene_08160.t1,gene_05800.t1,gene_01531.t1,gene_03572.t1,gene_02233.t1,gene_08332.t1,gene_09861.t1,gene_02462.t1,gene_05978.t1,gene_05746.t1,gene_02421.t1,gene_03162.t1,gene_08395.t1,gene_01247.t1,gene_02817.t1,gene_00979.t1,gene_05126.t1,gene_05817.t1,gene_02125.t1,gene_06325.t1 | | protein glycosylation | biological_process |

**Table S3 Detailed Gene Ontology (GO) classification of protein families in the genome of *P. paneum* OM1 (*Continued*)**

| **GO ID** | **Seq Num** | | **Seq List** | **GO term** | **Category** |
| --- | --- | --- | --- | --- | --- |
| GO:0009820 | 5 | gene_05483.t1,gene_07849.t1,gene_05257.t1,gene_00621.t1,gene_04763.t1 | | alkaloid metabolic process | biological_process |
| GO:0006488 | 7 | gene_07018.t1,gene_02943.t1,gene_02439.t1,gene_06952.t1,gene_07000.t1,gene_08298.t1,gene_10419.t1 | | dolichol-linked oligosaccharide biosynthetic process | biological_process |
| GO:0006241 | 1 | gene_07884.t1 | | CTP biosynthetic process | biological_process |
| GO:0009229 | 3 | gene_04276.t1,gene_07868.t1,gene_01046.t1 | | thiamine diphosphate biosynthetic process | biological_process |
| GO:0009228 | 4 | gene_09923.t1,gene_00596.t1,gene_07868.t1,gene_01046.t1 | | thiamine biosynthetic process | biological_process |
| GO:0006464 | 7 | gene_09008.t1,gene_09100.t1,gene_03839.t1,gene_08628.t1,gene_00453.t1,gene_10270.t1,gene_09204.t1 | | cellular protein modification process | biological_process |
| GO:0006465 | 6 | gene_08545.t1,gene_09230.t1,gene_09050.t1,gene_03043.t1,gene_07920.t1,gene_00277.t1 | | signal peptide processing | biological_process |
| GO:0000379 | 2 | gene_05909.t1,gene_02939.t1 | | tRNA-type intron splice site recognition and cleavage | biological_process |
| GO:0000028 | 1 | gene_09004.t1 | | ribosomal small subunit assembly | biological_process |
| GO:0006796 | 1 | gene_07215.t1 | | phosphate-containing compound metabolic process | biological_process |
| GO:0006790 | 1 | gene_03882.t1 | | sulfur compound metabolic process | biological_process |
| GO:0006069 | 1 | gene_00963.t1 | | ethanol oxidation | biological_process |
| GO:0000083 | 1 | gene_09058.t1 | | regulation of transcription involved in G1/S transition of mitotic cell cycle | biological_process |
| GO:0045039 | 1 | gene_01635.t1 | | protein insertion into mitochondrial inner membrane | biological_process |
| GO:0045033 | 1 | gene_06702.t1 | | peroxisome inheritance | biological_process |
| GO:0006661 | 1 | gene_10495.t1 | | phosphatidylinositol biosynthetic process | biological_process |
| GO:0006662 | 1 | gene_01940.t1 | | glycerol ether metabolic process | biological_process |
| GO:0031297 | 1 | gene_03935.t1 | | replication fork processing | biological_process |
| GO:0006665 | 5 | gene_06715.t1,gene_04370.t1,gene_04434.t1,gene_09922.t1,gene_05878.t1 | | sphingolipid metabolic process | biological_process |
| GO:0051056 | 1 | gene_09563.t1 | | regulation of small GTPase mediated signal transduction | biological_process |
| GO:0043967 | 1 | gene_00391.t1 | | histone H4 acetylation | biological_process |
| GO:0043968 | 1 | gene_00391.t1 | | histone H2A acetylation | biological_process |
| GO:0010133 | 3 | gene_03825.t1,gene_02582.t1,gene_06400.t1 | | proline catabolic process to glutamate | biological_process |
| GO:1904263 | 2 | gene_09312.t1,gene_07017.t1 | | positive regulation of TORC1 signaling | biological_process |
| GO:0031507 | 1 | gene_07352.t1 | | heterochromatin assembly | biological_process |
| GO:0031505 | 3 | gene_10016.t1,gene_09154.t1,gene_01169.t1 | | fungal-type cell wall organization | biological_process |

**Table S3 Detailed Gene Ontology (GO) classification of protein families in the genome of *P. paneum* OM (*Continued*)**

| **GO ID** | **Seq Num** | | **Seq List** | **GO term** | **Category** |
| --- | --- | --- | --- | --- | --- |
| GO:0000154 | 1 | gene_01030.t1 | | rRNA modification | biological_process |
| GO:0006807 | 18 | gene_05779.t1,gene_07811.t1,gene_10541.t1,gene_01471.t1,gene_07891.t1,gene_10246.t1,gene_09112.t1,gene_01256.t1,gene_06247.t1,gene_03928.t1,gene_10165.t1,gene_09586.t1,gene_10580.t1,gene_10011.t1,gene_07533.t1,gene_08759.t1,gene_10588.t1,gene_04568.t1 | | nitrogen compound metabolic process | biological_process |
| GO:0006801 | 1 | gene_00487.t1 | | superoxide metabolic process | biological_process |
| GO:0006809 | 1 | gene_08723.t1 | | nitric oxide biosynthetic process | biological_process |
| GO:0046916 | 7 | gene_01285.t1,gene_03300.t1,gene_10251.t1,gene_00177.t1,gene_07729.t1,gene_10631.t1,gene_02153.t1 | | cellular transition metal ion homeostasis | biological_process |
| GO:0070197 | 1 | gene_05891.t1 | | meiotic attachment of telomere to nuclear envelope | biological_process |
| GO:0007229 | 1 | gene_10062.t1 | | integrin-mediated signaling pathway | biological_process |
| GO:0019674 | 3 | gene_08533.t1,gene_09241.t1,gene_07119.t1 | | NAD metabolic process | biological_process |
| GO:0019679 | 2 | gene_00257.t1,gene_09476.t1 | | propionate metabolic process, methylcitrate cycle | biological_process |
| GO:0032065 | 2 | gene_04533.t1,gene_01180.t1 | | maintenance of protein location in cell cortex | biological_process |
| GO:0072666 | 2 | gene_05346.t1,gene_09100.t1 | | establishment of protein localization to vacuole | biological_process |
| GO:0002949 | 2 | gene_04246.t1,gene_09601.t1 | | tRNA threonylcarbamoyladenosine modification | biological_process |
| GO:0002084 | 1 | gene_09078.t1 | | protein depalmitoylation | biological_process |
| GO:0016126 | 12 | gene_01364.t1,gene_04746.t1,gene_03020.t1,gene_08853.t1,gene_10502.t1,gene_07280.t1,gene_00352.t1,gene_01577.t1,gene_02975.t1,gene_04541.t1,gene_03309.t1,gene_04110.t1 | | sterol biosynthetic process | biological_process |
| GO:0016125 | 3 | gene_03504.t1,gene_01909.t1,gene_06509.t1 | | sterol metabolic process | biological_process |
| GO:0016578 | 1 | gene_10530.t1 | | histone deubiquitination | biological_process |
| GO:0097720 | 1 | gene_08141.t1 | | calcineurin-mediated signaling | biological_process |
| GO:0051276 | 3 | gene_06720.t1,gene_03476.t1,gene_08023.t1 | | chromosome organization | biological_process |
| GO:0007033 | 1 | gene_06125.t1 | | vacuole organization | biological_process |
| GO:0007030 | 2 | gene_07871.t1,gene_06774.t1 | | Golgi organization | biological_process |
| GO:0007031 | 5 | gene_04177.t1,gene_07101.t1,gene_06038.t1,gene_08176.t1,gene_03246.t1 | | peroxisome organization | biological_process |
| GO:0007034 | 13 | gene_03881.t1,gene_03659.t1,gene_09100.t1,gene_10035.t1,gene_10321.t1,gene_03667.t1,gene_02491.t1,gene_06105.t1,gene_06338.t1,gene_02853.t1,gene_05209.t1,gene_05346.t1,gene_06141.t1 | | vacuolar transport | biological_process |
| GO:1904380 | 1 | gene_08332.t1 | | endoplasmic reticulum mannose trimming | biological_process |

**Table S3 Detailed Gene Ontology (GO) classification of protein families in the genome of *P. paneum* OM1 (*Continued*)**

| **GO ID** | **Seq Num** | | **Seq List** | **GO term** | **Category** |
| --- | --- | --- | --- | --- | --- |
| GO:1901136 | 1 | gene_06777.t1 | | carbohydrate derivative catabolic process | biological_process |
| GO:1901135 | 9 | gene_00152.t1,gene_00659.t1,gene_08226.t1,gene_09623.t1,gene_06634.t1,gene_00389.t1,gene_03848.t1,gene_04359.t1,gene_03632.t1 | | carbohydrate derivative metabolic process | biological_process |
| GO:0071025 | 1 | gene_02565.t1 | | RNA surveillance | biological_process |
| GO:0030245 | 6 | gene_03630.t1,gene_02981.t1,gene_08104.t1,gene_05405.t1,gene_01844.t1,gene_02670.t1 | | cellulose catabolic process | biological_process |
| GO:0046041 | 1 | gene_01019.t1 | | ITP metabolic process | biological_process |
| GO:0019878 | 4 | gene_05493.t1,gene_10072.t1,gene_03038.t1,gene_03989.t1 | | lysine biosynthetic process via aminoadipic acid | biological_process |
| GO:0006325 | 32 | gene_00705.t1,gene_04231.t1,gene_03101.t1,gene_02360.t1,gene_02703.t1,gene_09874.t1,gene_07183.t1,gene_02668.t1,gene_00682.t1,gene_02804.t1,gene_09220.t1,gene_08500.t1,gene_01223.t1,gene_10177.t1,gene_09828.t1,gene_10281.t1,gene_07759.t1,gene_05805.t1,gene_05523.t1,gene_10003.t1,gene_10008.t1,gene_05373.t1,gene_04656.t1,gene_00415.t1,gene_07837.t1,gene_10229.t1,gene_09585.t1,gene_07640.t1,gene_10407.t1,gene_00548.t1,gene_00832.t1,gene_03898.t1 | | chromatin organization | biological_process |
| GO:0001731 | 1 | gene_08881.t1 | | formation of translation preinitiation complex | biological_process |
| GO:0044571 | 1 | gene_09097.t1 | | [2Fe-2S] cluster assembly | biological_process |
| GO:0033621 | 1 | gene_05249.t1 | | nuclear-transcribed mRNA catabolic process, meiosis-specific transcripts | biological_process |
| GO:0032456 | 1 | gene_06774.t1 | | endocytic recycling | biological_process |
| GO:0030026 | 3 | gene_10247.t1,gene_00807.t1,gene_03253.t1 | | cellular manganese ion homeostasis | biological_process |
| GO:0015940 | 6 | gene_03893.t1,gene_03436.t1,gene_05955.t1,gene_01676.t1,gene_01574.t1,gene_07251.t1 | | pantothenate biosynthetic process | biological_process |
| GO:0071816 | 1 | gene_09348.t1 | | tail-anchored membrane protein insertion into ER membrane | biological_process |
| GO:0006491 | 1 | gene_06032.t1 | | N-glycan processing | biological_process |
| GO:0006490 | 1 | gene_06325.t1 | | oligosaccharide-lipid intermediate biosynthetic process | biological_process |
| GO:0097054 | 1 | gene_04134.t1 | | L-glutamate biosynthetic process | biological_process |
| GO:0097056 | 2 | gene_09273.t1,gene_05654.t1 | | selenocysteinyl-tRNA(Sec) biosynthetic process | biological_process |
| GO:0097502 | 3 | gene_03572.t1,gene_09608.t1,gene_05724.t1 | | mannosylation | biological_process |
| GO:0097053 | 2 | gene_00551.t1,gene_04082.t1 | | L-kynurenine catabolic process | biological_process |
| GO:0006259 | 2 | gene_04413.t1,gene_05741.t1 | | DNA metabolic process | biological_process |

**Table S3 Detailed Gene Ontology (GO) classification of protein families in the genome of *P. paneum* OM1 (*Continued*)**

| **GO ID** | **Seq Num** | | **Seq List** | **GO term** | **Category** |
| --- | --- | --- | --- | --- | --- |
| GO:0030001 | 1 | gene_10321.t1 | | metal ion transport | biological_process |
| GO:0045893 | 1 | gene_08663.t1 | | positive regulation of transcription, DNA-templated | biological_process |
| GO:0006471 | 1 | gene_00229.t1 | | protein ADP-ribosylation | biological_process |
| GO:0010390 | 1 | gene_09585.t1 | | histone monoubiquitination | biological_process |
| GO:0006474 | 1 | gene_05336.t1 | | N-terminal protein amino acid acetylation | biological_process |
| GO:0046294 | 2 | gene_04252.t1,gene_07706.t1 | | formaldehyde catabolic process | biological_process |
| GO:0009968 | 1 | gene_07012.t1 | | negative regulation of signal transduction | biological_process |
| GO:0009966 | 3 | gene_08172.t1,gene_05842.t1,gene_03512.t1 | | regulation of signal transduction | biological_process |
| GO:0006782 | 7 | gene_05843.t1,gene_01680.t1,gene_04193.t1,gene_04355.t1,gene_10525.t1,gene_05150.t1,gene_03980.t1 | | protoporphyrinogen IX biosynthetic process | biological_process |
| GO:0006780 | 1 | gene_10525.t1 | | uroporphyrinogen III biosynthetic process | biological_process |
| GO:0006784 | 1 | gene_03787.t1 | | heme A biosynthetic process | biological_process |
| GO:0022900 | 3 | gene_04447.t1,gene_07137.t1,gene_09825.t1 | | electron transport chain | biological_process |
| GO:0006071 | 1 | gene_07365.t1 | | glycerol metabolic process | biological_process |
| GO:0022904 | 1 | gene_00583.t1 | | respiratory electron transport chain | biological_process |
| GO:0006673 | 1 | gene_06167.t1 | | inositol phosphoceramide metabolic process | biological_process |
| GO:0006672 | 2 | gene_06499.t1,gene_10132.t1 | | ceramide metabolic process | biological_process |
| GO:0006120 | 2 | gene_07351.t1,gene_08864.t1 | | mitochondrial electron transport, NADH to ubiquinone | biological_process |
| GO:0045116 | 2 | gene_03524.t1,gene_06445.t1 | | protein neddylation | biological_process |
| GO:0031571 | 1 | gene_02629.t1 | | mitotic G1 DNA damage checkpoint signaling | biological_process |
| GO:0006536 | 3 | gene_05088.t1,gene_09066.t1,gene_10583.t1 | | glutamate metabolic process | biological_process |
| GO:0006813 | 1 | gene_08146.t1 | | potassium ion transport | biological_process |
| GO:0006530 | 1 | gene_07801.t1 | | asparagine catabolic process | biological_process |
| GO:0006811 | 7 | gene_07939.t1,gene_05352.t1,gene_04031.t1,gene_05744.t1,gene_02961.t1,gene_09989.t1,gene_05827.t1 | | ion transport | biological_process |
| GO:0006817 | 3 | gene_07427.t1,gene_06183.t1,gene_07824.t1 | | phosphate ion transport | biological_process |
| GO:0006816 | 1 | gene_09583.t1 | | calcium ion transport | biological_process |
| GO:1902531 | 2 | gene_05645.t1,gene_01792.t1 | | regulation of intracellular signal transduction | biological_process |
| GO:0070966 | 1 | gene_02565.t1 | | nuclear-transcribed mRNA catabolic process, no-go decay | biological_process |

**Table S3 Detailed Gene Ontology (GO) classification of protein families in the genome of *P. paneum* OM1 (*Continued*)**

| **GO ID** | **Seq Num** | | **Seq List** | **GO term** | **Category** |
| --- | --- | --- | --- | --- | --- |
| GO:0046907 | 9 | gene_05796.t1,gene_10035.t1,gene_02491.t1,gene_06105.t1,gene_10545.t1,gene_06338.t1,gene_05209.t1,gene_06141.t1,gene_00603.t1 | | intracellular transport | biological_process |
| GO:0006171 | 1 | gene_03592.t1 | | cAMP biosynthetic process | biological_process |
| GO:0006656 | 2 | gene_06238.t1,gene_05187.t1 | | phosphatidylcholine biosynthetic process | biological_process |
| GO:0048015 | 2 | gene_08215.t1,gene_07371.t1 | | phosphatidylinositol-mediated signaling | biological_process |
| GO:0019464 | 1 | gene_03285.t1 | | glycine decarboxylation via glycine cleavage system | biological_process |
| GO:0051083 | 1 | gene_03313.t1 | | 'de novo' cotranslational protein folding | biological_process |
| GO:0070143 | 2 | gene_00660.t1,gene_09742.t1 | | mitochondrial alanyl-tRNA aminoacylation | biological_process |
| GO:0016485 | 1 | gene_05844.t1 | | protein processing | biological_process |
| GO:0016480 | 1 | gene_07105.t1 | | negative regulation of transcription by RNA polymerase III | biological_process |
| GO:0016482 | 2 | gene_02853.t1,gene_02540.t1 | | cytosolic transport | biological_process |
| GO:0000422 | 1 | gene_05641.t1 | | autophagy of mitochondrion | biological_process |
| GO:0000423 | 1 | gene_08030.t1 | | mitophagy | biological_process |
| GO:0000956 | 2 | gene_09407.t1,gene_07641.t1 | | nuclear-transcribed mRNA catabolic process | biological_process |
| GO:0071562 | 1 | gene_06131.t1 | | nucleus-vacuole junction assembly | biological_process |
| GO:0019264 | 2 | gene_01168.t1,gene_03196.t1 | | glycine biosynthetic process from serine | biological_process |
| GO:0000959 | 1 | gene_09628.t1 | | mitochondrial RNA metabolic process | biological_process |
| GO:0000737 | 1 | gene_03054.t1 | | DNA catabolic process, endonucleolytic | biological_process |
| GO:0000731 | 1 | gene_06439.t1 | | DNA synthesis involved in DNA repair | biological_process |
| GO:0000349 | 1 | gene_07836.t1 | | generation of catalytic spliceosome for first transesterification step | biological_process |
| GO:0019287 | 4 | gene_00352.t1,gene_01364.t1,gene_08132.t1,gene_08399.t1 | | isopentenyl diphosphate biosynthetic process, mevalonate pathway | biological_process |
| GO:0019284 | 2 | gene_02356.t1,gene_10424.t1 | | L-methionine salvage from S-adenosylmethionine | biological_process |
| GO:0019285 | 3 | gene_04677.t1,gene_01810.t1,gene_06957.t1 | | glycine betaine biosynthetic process from choline | biological_process |
| GO:0007021 | 2 | gene_01139.t1,gene_05824.t1 | | tubulin complex assembly | biological_process |
| GO:0007020 | 5 | gene_06203.t1,gene_08722.t1,gene_05691.t1,gene_08161.t1,gene_07037.t1 | | microtubule nucleation | biological_process |
| GO:0007023 | 3 | gene_06759.t1,gene_01139.t1,gene_05824.t1 | | post-chaperonin tubulin folding pathway | biological_process |
| GO:0030833 | 4 | gene_06990.t1,gene_07743.t1,gene_02382.t1,gene_03091.t1 | | regulation of actin filament polymerization | biological_process |

**Table S3 Detailed Gene Ontology (GO) classification of protein families in the genome of *P. paneum* OM1 (*Continued*)**

| **GO ID** | **Seq Num** | | **Seq List** | **GO term** | **Category** |
| --- | --- | --- | --- | --- | --- |
| GO:0032981 | 4 | gene_02773.t1,gene_02255.t1,gene_08052.t1,gene_10382.t1 | | mitochondrial respiratory chain complex I assembly | biological_process |
| GO:0007029 | 1 | gene_03296.t1 | | endoplasmic reticulum organization | biological_process |
| GO:0071705 | 1 | gene_05468.t1 | | nitrogen compound transport | biological_process |
| GO:0071704 | 1 | gene_00701.t1 | | organic substance metabolic process | biological_process |
| GO:0071702 | 2 | gene_05468.t1,gene_09187.t1 | | organic substance transport | biological_process |
| GO:0009411 | 1 | gene_06477.t1 | | response to UV | biological_process |
| GO:0016226 | 12 | gene_06236.t1,gene_02122.t1,gene_07825.t1,gene_08094.t1,gene_00550.t1,gene_09989.t1,gene_07666.t1,gene_10005.t1,gene_00274.t1,gene_05175.t1,gene_01557.t1,gene_00305.t1 | | iron-sulfur cluster assembly | biological_process |
| GO:0042026 | 1 | gene_01751.t1 | | protein refolding | biological_process |
| GO:0034227 | 2 | gene_01562.t1,gene_05774.t1 | | tRNA thio-modification | biological_process |
| GO:0034599 | 13 | gene_05939.t1,gene_09415.t1,gene_05276.t1,gene_02994.t1,gene_07238.t1,gene_06296.t1,gene_02909.t1,gene_04070.t1,gene_02830.t1,gene_09292.t1,gene_03631.t1,gene_07930.t1,gene_10593.t1 | | cellular response to oxidative stress | biological_process |
| GO:0006310 | 24 | gene_01043.t1,gene_07889.t1,gene_03702.t1,gene_06517.t1,gene_06102.t1,gene_08299.t1,gene_03054.t1,gene_08530.t1,gene_09591.t1,gene_05747.t1,gene_02787.t1,gene_05811.t1,gene_02991.t1,gene_00363.t1,gene_09891.t1,gene_05677.t1,gene_08889.t1,gene_08214.t1,gene_04537.t1,gene_07821.t1,gene_06740.t1,gene_09184.t1,gene_08300.t1,gene_02270.t1 | | DNA recombination | biological_process |
| GO:0006313 | 3 | gene_02212.t1,gene_01274.t1,gene_10675.t1 | | transposition, DNA-mediated | biological_process |
| GO:0051726 | 1 | gene_01330.t1 | | regulation of cell cycle | biological_process |
| GO:0071630 | 1 | gene_00356.t1 | | nuclear protein quality control by the ubiquitin-proteasome system | biological_process |
| GO:0045905 | 1 | gene_01551.t1 | | positive regulation of translational termination | biological_process |
| GO:0045901 | 2 | gene_01551.t1,gene_08192.t1 | | positive regulation of translational elongation | biological_process |
| GO:0015976 | 2 | gene_10073.t1,gene_04635.t1 | | carbon utilization | biological_process |
| GO:0002143 | 1 | gene_08455.t1 | | tRNA wobble position uridine thiolation | biological_process |
| GO:0006409 | 1 | gene_07129.t1 | | tRNA export from nucleus | biological_process |
| GO:0006265 | 3 | gene_10607.t1,gene_01025.t1,gene_02674.t1 | | DNA topological change | biological_process |
| GO:0017196 | 2 | gene_03249.t1,gene_01755.t1 | | N-terminal peptidyl-methionine acetylation | biological_process |

**Table S3 Detailed Gene Ontology (GO) classification of protein families in the genome of *P. paneum* OM1 (*Continued*)**

| **GO ID** | **Seq Num** | | **Seq List** | **GO term** | **Category** |
| --- | --- | --- | --- | --- | --- |
| GO:0006260 | 32 | gene_01043.t1,gene_04551.t1,gene_04254.t1,gene_06309.t1,gene_03702.t1,gene_06517.t1,gene_10241.t1,gene_08299.t1,gene_01660.t1,gene_04166.t1,gene_06076.t1,gene_08530.t1,gene_06439.t1,gene_02787.t1,gene_04582.t1,gene_08269.t1,gene_06219.t1,gene_05811.t1,gene_06856.t1,gene_07010.t1,gene_05556.t1,gene_00675.t1,gene_08300.t1,gene_06427.t1,gene_05677.t1,gene_07821.t1,gene_06340.t1,gene_10155.t1,gene_00595.t1,gene_07001.t1,gene_03200.t1,gene_00297.t1 | | DNA replication | biological_process |
| GO:0006261 | 4 | gene_01390.t1,gene_05741.t1,gene_09767.t1,gene_08287.t1 | | DNA-dependent DNA replication | biological_process |
| GO:0006268 | 1 | gene_09071.t1 | | DNA unwinding involved in DNA replication | biological_process |
| GO:0006269 | 1 | gene_01018.t1 | | DNA replication, synthesis of RNA primer | biological_process |
| GO:0043328 | 3 | gene_07913.t1,gene_06652.t1,gene_01280.t1 | | protein transport to vacuole involved in ubiquitin-dependent protein catabolic process via the multivesicular body sorting pathway | biological_process |
| GO:0009204 | 1 | gene_09266.t1 | | deoxyribonucleoside triphosphate catabolic process | biological_process |
| GO:0006446 | 1 | gene_03188.t1 | | regulation of translational initiation | biological_process |
| GO:0006401 | 5 | gene_06776.t1,gene_00504.t1,gene_09856.t1,gene_00829.t1,gene_00355.t1 | | RNA catabolic process | biological_process |
| GO:0006048 | 4 | gene_02481.t1,gene_00859.t1,gene_02361.t1,gene_06597.t1 | | UDP-N-acetylglucosamine biosynthetic process | biological_process |
| GO:0006040 | 1 | gene_03840.t1 | | amino sugar metabolic process | biological_process |
| GO:0036503 | 1 | gene_04068.t1 | | ERAD pathway | biological_process |
| GO:0042744 | 6 | gene_03391.t1,gene_02272.t1,gene_05483.t1,gene_00621.t1,gene_00545.t1,gene_01284.t1 | | hydrogen peroxide catabolic process | biological_process |
| GO:0000226 | 1 | gene_06271.t1 | | microtubule cytoskeleton organization | biological_process |
| GO:0042742 | 1 | gene_01789.t1 | | defense response to bacterium | biological_process |
| GO:0065003 | 1 | gene_08486.t1 | | protein-containing complex assembly | biological_process |
| GO:0048478 | 1 | gene_01226.t1 | | replication fork protection | biological_process |
| GO:0006685 | 2 | gene_00291.t1,gene_07110.t1 | | sphingomyelin catabolic process | biological_process |
| GO:0009156 | 2 | gene_10016.t1,gene_09154.t1 | | ribonucleoside monophosphate biosynthetic process | biological_process |
| GO:0008156 | 1 | gene_01336.t1 | | negative regulation of DNA replication | biological_process |
| GO:0008152 | 9 | gene_09801.t1,gene_08786.t1,gene_08783.t1,gene_08784.t1,gene_08787.t1,gene_07780.t1,gene_08782.t1,gene_01601.t1,gene_08780.t1 | | metabolic process | biological_process |
| GO:0051321 | 5 | gene_06548.t1,gene_07611.t1,gene_01336.t1,gene_03054.t1,gene_05747.t1 | | meiotic cell cycle | biological_process |

**Table S3 Detailed Gene Ontology (GO) classification of protein families in the genome of *P. paneum* OM1 (*Continued*)**

| **GO ID** | **Seq Num** | | **Seq List** | **GO term** | **Category** |
| --- | --- | --- | --- | --- | --- |
| GO:0000132 | 1 | gene_10487.t1 | | establishment of mitotic spindle orientation | biological_process |
| GO:0140021 | 1 | gene_02936.t1 | | mitochondrial ADP transmembrane transport | biological_process |
| GO:0070814 | 2 | gene_05577.t1,gene_07261.t1 | | hydrogen sulfide biosynthetic process | biological_process |
| GO:0006869 | 9 | gene_07300.t1,gene_04067.t1,gene_10059.t1,gene_06774.t1,gene_08315.t1,gene_09579.t1,gene_02094.t1,gene_04653.t1,gene_07273.t1 | | lipid transport | biological_process |
| GO:0006865 | 25 | gene_04673.t1,gene_06496.t1,gene_08121.t1,gene_04752.t1,gene_01817.t1,gene_02530.t1,gene_04754.t1,gene_06626.t1,gene_08978.t1,gene_04205.t1,gene_03345.t1,gene_06052.t1,gene_02886.t1,gene_07016.t1,gene_09286.t1,gene_10190.t1,gene_03370.t1,gene_01062.t1,gene_04498.t1,gene_09371.t1,gene_03323.t1,gene_03215.t1,gene_07033.t1,gene_07155.t1,gene_05297.t1 | | amino acid transport | biological_process |
| GO:0043618 | 1 | gene_04435.t1 | | regulation of transcription from RNA polymerase II promoter in response to stress | biological_process |
| GO:0070973 | 1 | gene_02093.t1 | | protein localization to endoplasmic reticulum exit site | biological_process |
| GO:0000041 | 2 | gene_02172.t1,gene_06588.t1 | | transition metal ion transport | biological_process |
| GO:0000045 | 4 | gene_03894.t1,gene_06906.t1,gene_05641.t1,gene_03673.t1 | | autophagosome assembly | biological_process |
| GO:0055088 | 2 | gene_03348.t1,gene_02329.t1 | | lipid homeostasis | biological_process |
| GO:0016925 | 2 | gene_06429.t1,gene_09728.t1 | | protein sumoylation | biological_process |
| GO:0055085 | 51 | gene_00014.t1,gene_07817.t1,gene_03370.t1,gene_09335.t1,gene_05994.t1,gene_07016.t1,gene_08121.t1,gene_03782.t1,gene_09286.t1,gene_01215.t1,gene_02504.t1,gene_05068.t1,gene_05476.t1,gene_02940.t1,gene_03843.t1,gene_00016.t1,gene_10638.t1,gene_01178.t1,gene_03826.t1,gene_08448.t1,gene_06206.t1,gene_08978.t1,gene_04249.t1,gene_00215.t1,gene_09363.t1,gene_02008.t1,gene_06496.t1,gene_00456.t1,gene_00316.t1,gene_09124.t1,gene_00749.t1,gene_05952.t1,gene_07097.t1,gene_06363.t1,gene_07345.t1,gene_04752.t1,gene_05326.t1,gene_10190.t1,gene_05492.t1,gene_10493.t1,gene_01062.t1,gene_09356.t1,gene_00951.t1,gene_03345.t1,gene_01021.t1,gene_05144.t1,gene_08932.t1,gene_06328.t1,gene_04498.t1,gene_07584.t1,gene_05297.t1 | | transmembrane transport | biological_process |
| GO:0007249 | 1 | gene_07623.t1 | | I-kappaB kinase/NF-kappaB signaling | biological_process |
| GO:0032264 | 1 | gene_05147.t1 | | IMP salvage | biological_process |
| GO:0032515 | 1 | gene_05153.t1 | | negative regulation of phosphoprotein phosphatase activity | biological_process |
| GO:0032049 | 2 | gene_08051.t1,gene_02201.t1 | | cardiolipin biosynthetic process | biological_process |

**Table S3 Detailed Gene Ontology (GO) classification of protein families in the genome of *P. paneum* OM1 (*Continued*)**

| **GO ID** | **Seq Num** | | **Seq List** | **GO term** | **Category** |
| --- | --- | --- | --- | --- | --- |
| GO:0071555 | 18 | gene_10650.t1,gene_01725.t1,gene_02291.t1,gene_06586.t1,gene_00810.t1,gene_04734.t1,gene_08927.t1,gene_09106.t1,gene_02770.t1,gene_09475.t1,gene_03591.t1,gene_06645.t1,gene_00523.t1,gene_01063.t1,gene_02551.t1,gene_00787.t1,gene_07068.t1,gene_05091.t1 | | cell wall organization | biological_process |
| GO:0010467 | 1 | gene_09453.t1 | | gene expression | biological_process |
| GO:0032469 | 1 | gene_04068.t1 | | endoplasmic reticulum calcium ion homeostasis | biological_process |
| GO:0010468 | 1 | gene_09822.t1 | | regulation of gene expression | biological_process |
| GO:0051403 | 2 | gene_08916.t1,gene_08746.t1 | | stress-activated MAPK cascade | biological_process |
| GO:0042759 | 1 | gene_02333.t1 | | long-chain fatty acid biosynthetic process | biological_process |
| GO:0051409 | 1 | gene_03326.t1 | | response to nitrosative stress | biological_process |
| GO:0007015 | 5 | gene_02165.t1,gene_00869.t1,gene_03881.t1,gene_08752.t1,gene_08716.t1 | | actin filament organization | biological_process |
| GO:0007017 | 5 | gene_00668.t1,gene_01652.t1,gene_00015.t1,gene_08913.t1,gene_10420.t1 | | microtubule-based process | biological_process |
| GO:0007018 | 12 | gene_05738.t1,gene_03046.t1,gene_07366.t1,gene_03452.t1,gene_05745.t1,gene_05840.t1,gene_04724.t1,gene_08235.t1,gene_10636.t1,gene_10520.t1,gene_02766.t1,gene_00134.t1 | | microtubule-based movement | biological_process |
| GO:0015031 | 88 | gene_07871.t1,gene_01552.t1,gene_10159.t1,gene_10290.t1,gene_05611.t1,gene_07863.t1,gene_05127.t1,gene_09312.t1,gene_00461.t1,gene_05641.t1,gene_02838.t1,gene_07625.t1,gene_04317.t1,gene_06638.t1,gene_09511.t1,gene_08590.t1,gene_00974.t1,gene_09873.t1,gene_07007.t1,gene_01090.t1,gene_08803.t1,gene_03696.t1,gene_05629.t1,gene_05717.t1,gene_05131.t1,gene_02335.t1,gene_04156.t1,gene_02706.t1,gene_03179.t1,gene_10183.t1,gene_01023.t1,gene_07646.t1,gene_02807.t1,gene_06774.t1,gene_10558.t1,gene_09945.t1,gene_01728.t1,gene_07017.t1,gene_05520.t1,gene_06906.t1,gene_09159.t1,gene_08775.t1,gene_10308.t1,gene_02784.t1,gene_04584.t1,gene_07961.t1,gene_09555.t1,gene_00356.t1,gene_10042.t1,gene_07570.t1,gene_00349.t1,gene_09260.t1,gene_09487.t1,gene_09485.t1,gene_08367.t1,gene_10418.t1,gene_03259.t1,gene_02033.t1,gene_09123.t1,gene_02521.t1,gene_10095.t1,gene_04136.t1,gene_01250.t1,gene_06461.t1,gene_00051.t1,gene_05628.t1,gene_04308.t1,gene_05929.t1,gene_00964.t1,gene_06590.t1,gene_06330.t1,gene_07354.t1,gene_08108.t1,gene_09156.t1,gene_08719.t1,gene_02217.t1,gene_07362.t1,gene_03894.t1,gene_08575.t1,gene_07697.t1,gene_08294.t1,gene_10294.t1,gene_05343.t1,gene_06399.t1,gene_03764.t1,gene_06544.t1,gene_08808.t1,gene_08974.t1 | | protein transport | biological_process |

**Table S3 Detailed Gene Ontology (GO) classification of protein families in the genome of *P. paneum* OM1 (*Continued*)**

| **GO ID** | **Seq Num** | | **Seq List** | **GO term** | **Category** |
| --- | --- | --- | --- | --- | --- |
| GO:1990961 | 3 | gene_05823.t1,gene_06518.t1,gene_09522.t1 | | xenobiotic detoxification by transmembrane export across the plasma membrane | biological_process |
| GO:0038203 | 1 | gene_10315.t1 | | TORC2 signaling | biological_process |
| GO:0006307 | 3 | gene_03350.t1,gene_09114.t1,gene_01975.t1 | | DNA dealkylation involved in DNA repair | biological_process |
| GO:0051716 | 2 | gene_00548.t1,gene_00746.t1 | | cellular response to stimulus | biological_process |
| GO:0006303 | 2 | gene_04537.t1,gene_02991.t1 | | double-strand break repair via nonhomologous end joining | biological_process |
| GO:0006302 | 7 | gene_03054.t1,gene_06548.t1,gene_03583.t1,gene_04738.t1,gene_09338.t1,gene_02776.t1,gene_00867.t1 | | double-strand break repair | biological_process |
| GO:0006301 | 1 | gene_06339.t1 | | postreplication repair | biological_process |
| GO:0044550 | 28 | gene_02085.t1,gene_01621.t1,gene_01962.t1,gene_08534.t1,gene_05410.t1,gene_08962.t1,gene_01127.t1,gene_04763.t1,gene_07849.t1,gene_08465.t1,gene_06013.t1,gene_04361.t1,gene_01661.t1,gene_00239.t1,gene_06622.t1,gene_07769.t1,gene_09894.t1,gene_09503.t1,gene_00854.t1,gene_03216.t1,gene_05606.t1,gene_05257.t1,gene_05500.t1,gene_05440.t1,gene_10582.t1,gene_05302.t1,gene_10490.t1,gene_01824.t1 | | secondary metabolite biosynthetic process | biological_process |
| GO:0006308 | 1 | gene_04293.t1 | | DNA catabolic process | biological_process |
| GO:0016104 | 1 | gene_04414.t1 | | triterpenoid biosynthetic process | biological_process |
| GO:0061780 | 1 | gene_09822.t1 | | mitotic cohesin loading | biological_process |
| GO:0046486 | 5 | gene_01166.t1,gene_04813.t1,gene_04991.t1,gene_00240.t1,gene_05011.t1 | | glycerolipid metabolic process | biological_process |
| GO:0017183 | 5 | gene_02208.t1,gene_02666.t1,gene_07601.t1,gene_02831.t1,gene_09990.t1 | | peptidyl-diphthamide biosynthetic process from peptidyl-histidine | biological_process |
| GO:0006271 | 6 | gene_09699.t1,gene_07212.t1,gene_10065.t1,gene_07744.t1,gene_07620.t1,gene_07617.t1 | | DNA strand elongation involved in DNA replication | biological_process |
| GO:0006270 | 11 | gene_01982.t1,gene_00515.t1,gene_01710.t1,gene_01540.t1,gene_05534.t1,gene_08245.t1,gene_06062.t1,gene_07862.t1,gene_08595.t1,gene_09071.t1,gene_06735.t1 | | DNA replication initiation | biological_process |
| GO:0006275 | 1 | gene_01660.t1 | | regulation of DNA replication | biological_process |
| GO:0006426 | 1 | gene_09244.t1 | | glycyl-tRNA aminoacylation | biological_process |
| GO:0033512 | 1 | gene_07350.t1 | | L-lysine catabolic process to acetyl-CoA via saccharopine | biological_process |
| GO:0008535 | 1 | gene_06931.t1 | | respiratory chain complex IV assembly | biological_process |
| GO:0042255 | 1 | gene_06349.t1 | | ribosome assembly | biological_process |

**Table S3 Detailed Gene Ontology (GO) classification of protein families in the genome of *P. paneum* OM1 (*Continued*)**

| **GO ID** | **Seq Num** | | **Seq List** | **GO term** | **Category** |
| --- | --- | --- | --- | --- | --- |
| GO:0042254 | 18 | gene_08509.t1,gene_01985.t1,gene_02480.t1,gene_03926.t1,gene_00268.t1,gene_05788.t1,gene_01678.t1,gene_06350.t1,gene_03475.t1,gene_03548.t1,gene_02232.t1,gene_08840.t1,gene_01599.t1,gene_08271.t1,gene_06571.t1,gene_09251.t1,gene_07733.t1,gene_07393.t1 | | ribosome biogenesis | biological_process |
| GO:0042256 | 2 | gene_09219.t1,gene_10589.t1 | | mature ribosome assembly | biological_process |
| GO:0009308 | 7 | gene_06041.t1,gene_09373.t1,gene_04449.t1,gene_01764.t1,gene_10189.t1,gene_07681.t1,gene_09128.t1 | | amine metabolic process | biological_process |
| GO:0048315 | 15 | gene_09058.t1,gene_10650.t1,gene_03571.t1,gene_00810.t1,gene_10384.t1,gene_05891.t1,gene_04321.t1,gene_06057.t1,gene_01163.t1,gene_01650.t1,gene_00224.t1,gene_01290.t1,gene_03570.t1,gene_09106.t1,gene_08876.t1 | | conidium formation | biological_process |
| GO:0009306 | 2 | gene_04192.t1,gene_04140.t1 | | protein secretion | biological_process |
| GO:0031087 | 1 | gene_04114.t1 | | deadenylation-independent decapping of nuclear-transcribed mRNA | biological_process |
| GO:0010265 | 2 | gene_06416.t1,gene_06381.t1 | | SCF complex assembly | biological_process |
| GO:0006695 | 1 | gene_08132.t1 | | cholesterol biosynthetic process | biological_process |
| GO:0006694 | 5 | gene_02639.t1,gene_07798.t1,gene_00026.t1,gene_08399.t1,gene_02494.t1 | | steroid biosynthetic process | biological_process |
| GO:2001256 | 1 | gene_09583.t1 | | regulation of store-operated calcium entry | biological_process |
| GO:0002191 | 1 | gene_00144.t1 | | cap-dependent translational initiation | biological_process |
| GO:0006436 | 2 | gene_09717.t1,gene_07095.t1 | | tryptophanyl-tRNA aminoacylation | biological_process |
| GO:1902600 | 2 | gene_03967.t1,gene_08358.t1 | | proton transmembrane transport | biological_process |
| GO:0031222 | 7 | gene_03467.t1,gene_05400.t1,gene_03663.t1,gene_01362.t1,gene_06731.t1,gene_00037.t1,gene_09125.t1 | | arabinan catabolic process | biological_process |
| GO:0000122 | 1 | gene_07352.t1 | | negative regulation of transcription by RNA polymerase II | biological_process |
| GO:0009098 | 4 | gene_07021.t1,gene_02066.t1,gene_06642.t1,gene_10595.t1 | | leucine biosynthetic process | biological_process |
| GO:0009099 | 3 | gene_00361.t1,gene_08592.t1,gene_09113.t1 | | valine biosynthetic process | biological_process |
| GO:0009097 | 5 | gene_00361.t1,gene_01418.t1,gene_08592.t1,gene_09113.t1,gene_05635.t1 | | isoleucine biosynthetic process | biological_process |
| GO:1905775 | 1 | gene_09071.t1 | | negative regulation of DNA helicase activity | biological_process |
| GO:0051391 | 1 | gene_01030.t1 | | tRNA acetylation | biological_process |
| GO:0006878 | 6 | gene_02696.t1,gene_07182.t1,gene_00796.t1,gene_00624.t1,gene_06931.t1,gene_05351.t1 | | cellular copper ion homeostasis | biological_process |
| GO:0006874 | 1 | gene_07909.t1 | | cellular calcium ion homeostasis | biological_process |

**Table S3 Detailed Gene Ontology (GO) classification of protein families in the genome of *P. paneum* OM1 (*Continued*)**

| **GO ID** | **Seq Num** | | **Seq List** | **GO term** | **Category** |
| --- | --- | --- | --- | --- | --- |
| GO:0015986 | 8 | gene_03015.t1,gene_06355.t1,gene_00267.t1,gene_09826.t1,gene_09484.t1,gene_03171.t1,gene_05980.t1,gene_06648.t1 | | ATP synthesis coupled proton transport | biological_process |
| GO:0000050 | 1 | gene_05706.t1 | | urea cycle | biological_process |
| GO:0000055 | 2 | gene_06638.t1,gene_01090.t1 | | ribosomal large subunit export from nucleus | biological_process |
| GO:0000054 | 2 | gene_05458.t1,gene_09219.t1 | | ribosomal subunit export from nucleus | biological_process |
| GO:0000056 | 1 | gene_01090.t1 | | ribosomal small subunit export from nucleus | biological_process |
| GO:0042790 | 1 | gene_04314.t1 | | nucleolar large rRNA transcription by RNA polymerase I | biological_process |
| GO:0019594 | 1 | gene_00578.t1 | | mannitol metabolic process | biological_process |
| GO:0019441 | 11 | gene_05407.t1,gene_03462.t1,gene_08361.t1,gene_08894.t1,gene_04083.t1,gene_03297.t1,gene_10549.t1,gene_03134.t1,gene_04519.t1,gene_10649.t1,gene_09095.t1 | | tryptophan catabolic process to kynurenine | biological_process |
| GO:0070125 | 1 | gene_01416.t1 | | mitochondrial translational elongation | biological_process |
| GO:0090522 | 2 | gene_09722.t1,gene_04572.t1 | | vesicle tethering involved in exocytosis | biological_process |
| GO:0032324 | 1 | gene_06163.t1 | | molybdopterin cofactor biosynthetic process | biological_process |
| GO:0033494 | 2 | gene_10373.t1,gene_00631.t1 | | ferulate metabolic process | biological_process |
| GO:0042138 | 1 | gene_04413.t1 | | meiotic DNA double-strand break formation | biological_process |
| GO:0033499 | 1 | gene_06566.t1 | | galactose catabolic process via UDP-galactose | biological_process |
| GO:0019915 | 2 | gene_04546.t1,gene_02505.t1 | | lipid storage | biological_process |
| GO:0007005 | 3 | gene_03755.t1,gene_06104.t1,gene_03080.t1 | | mitochondrion organization | biological_process |
| GO:0016024 | 2 | gene_04100.t1,gene_02201.t1 | | CDP-diacylglycerol biosynthetic process | biological_process |
| GO:0019628 | 1 | gene_00591.t1 | | urate catabolic process | biological_process |
| GO:0033036 | 1 | gene_05468.t1 | | macromolecule localization | biological_process |
| GO:0046039 | 1 | gene_01019.t1 | | GTP metabolic process | biological_process |
| GO:0046034 | 2 | gene_04186.t1,gene_03967.t1 | | ATP metabolic process | biological_process |
| GO:0046033 | 2 | gene_04186.t1,gene_01019.t1 | | AMP metabolic process | biological_process |
| GO:0030968 | 3 | gene_00740.t1,gene_07380.t1,gene_00030.t1 | | endoplasmic reticulum unfolded protein response | biological_process |
| GO:0016114 | 14 | gene_00780.t1,gene_00781.t1,gene_07526.t1,gene_00784.t1,gene_00785.t1,gene_04206.t1,gene_00786.t1,gene_00777.t1,gene_00783.t1,gene_00779.t1,gene_07522.t1,gene_04266.t1,gene_09298.t1,gene_00782.t1 | | terpenoid biosynthetic process | biological_process |
| GO:0015914 | 4 | gene_04010.t1,gene_01056.t1,gene_00896.t1,gene_09510.t1 | | phospholipid transport | biological_process |

**Table S3 Detailed Gene Ontology (GO) classification of protein families in the genome of *P. paneum* OM1 (*Continued*)**

| **GO ID** | **Seq Num** | | **Seq List** | **GO term** | **Category** |
| --- | --- | --- | --- | --- | --- |
| GO:0042407 | 2 | gene_05236.t1,gene_03603.t1 | | cristae formation | biological_process |
| GO:1903259 | 1 | gene_03981.t1 | | exon-exon junction complex disassembly | biological_process |
| GO:0046496 | 1 | gene_00517.t1 | | nicotinamide nucleotide metabolic process | biological_process |
| GO:0006198 | 1 | gene_02073.t1 | | cAMP catabolic process | biological_process |
| GO:0006190 | 1 | gene_03413.t1 | | inosine salvage | biological_process |
| GO:0006207 | 5 | gene_06009.t1,gene_01122.t1,gene_08081.t1,gene_06540.t1,gene_00647.t1 | | 'de novo' pyrimidine nucleobase biosynthetic process | biological_process |
| GO:0008615 | 1 | gene_08405.t1 | | pyridoxine biosynthetic process | biological_process |
| GO:1990426 | 1 | gene_05469.t1 | | mitotic recombination-dependent replication fork processing | biological_process |
| GO:0030148 | 1 | gene_00327.t1 | | sphingolipid biosynthetic process | biological_process |
| GO:0006427 | 1 | gene_10413.t1 | | histidyl-tRNA aminoacylation | biological_process |
| GO:0006424 | 2 | gene_07873.t1,gene_06273.t1 | | glutamyl-tRNA aminoacylation | biological_process |
| GO:0006425 | 1 | gene_02487.t1 | | glutaminyl-tRNA aminoacylation | biological_process |
| GO:0006422 | 2 | gene_03141.t1,gene_00665.t1 | | aspartyl-tRNA aminoacylation | biological_process |
| GO:0006423 | 1 | gene_04419.t1 | | cysteinyl-tRNA aminoacylation | biological_process |
| GO:0006420 | 1 | gene_03487.t1 | | arginyl-tRNA aminoacylation | biological_process |
| GO:0006421 | 2 | gene_09843.t1,gene_03207.t1 | | asparaginyl-tRNA aminoacylation | biological_process |
| GO:0000338 | 2 | gene_07432.t1,gene_08097.t1 | | protein deneddylation | biological_process |
| GO:0006428 | 2 | gene_02254.t1,gene_04722.t1 | | isoleucyl-tRNA aminoacylation | biological_process |
| GO:0006429 | 2 | gene_09679.t1,gene_10446.t1 | | leucyl-tRNA aminoacylation | biological_process |
| GO:0120029 | 5 | gene_07874.t1,gene_00003.t1,gene_06942.t1,gene_00673.t1,gene_01833.t1 | | proton export across plasma membrane | biological_process |
| GO:0097428 | 3 | gene_00274.t1,gene_07388.t1,gene_10267.t1 | | protein maturation by iron-sulfur cluster transfer | biological_process |
| GO:0050896 | 1 | gene_04415.t1 | | response to stimulus | biological_process |
| GO:0006513 | 1 | gene_06339.t1 | | protein monoubiquitination | biological_process |

**Table S3 Detailed Gene Ontology (GO) classification of protein families in the genome of *P. paneum* OM1 (*Continued*)**

| **GO ID** | **Seq Num** | | **Seq List** | **GO term** | **Category** |
| --- | --- | --- | --- | --- | --- |
| GO:0006511 | 33 | gene_09212.t1,gene_09182.t1,gene_06133.t1,gene_05133.t1,gene_09472.t1,gene_04184.t1,gene_07422.t1,gene_07916.t1,gene_10416.t1,gene_07791.t1,gene_01114.t1,gene_03863.t1,gene_08525.t1,gene_09635.t1,gene_01238.t1,gene_08748.t1,gene_09768.t1,gene_00974.t1,gene_03039.t1,gene_08301.t1,gene_03470.t1,gene_09853.t1,gene_00680.t1,gene_03286.t1,gene_05248.t1,gene_07309.t1,gene_10317.t1,gene_04108.t1,gene_05689.t1,gene_00032.t1,gene_06431.t1,gene_02020.t1,gene_09787.t1 | | ubiquitin-dependent protein catabolic process | biological_process |
| GO:0006515 | 2 | gene_05844.t1,gene_09415.t1 | | protein quality control for misfolded or incompletely synthesized proteins | biological_process |
| GO:0006730 | 7 | gene_01051.t1,gene_00302.t1,gene_01843.t1,gene_05535.t1,gene_01409.t1,gene_05443.t1,gene_00279.t1 | | one-carbon metabolic process | biological_process |
| GO:0009311 | 2 | gene_07604.t1,gene_09534.t1 | | oligosaccharide metabolic process | biological_process |
| GO:0009310 | 1 | gene_00962.t1 | | amine catabolic process | biological_process |
| GO:0000209 | 2 | gene_01605.t1,gene_01604.t1 | | protein polyubiquitination | biological_process |
| GO:0002181 | 1 | gene_03856.t1 | | cytoplasmic translation | biological_process |
| GO:0002182 | 1 | gene_00519.t1 | | cytoplasmic translational elongation | biological_process |
| GO:0061817 | 2 | gene_10059.t1,gene_04653.t1 | | endoplasmic reticulum-plasma membrane tethering | biological_process |
| GO:0009408 | 2 | gene_01682.t1,gene_09414.t1 | | response to heat | biological_process |
| GO:0006032 | 22 | gene_01798.t1,gene_07912.t1,gene_07875.t1,gene_05687.t1,gene_10573.t1,gene_03424.t1,gene_01799.t1,gene_01037.t1,gene_06552.t1,gene_01797.t1,gene_03719.t1,gene_02142.t1,gene_04380.t1,gene_04222.t1,gene_06768.t1,gene_10353.t1,gene_01801.t1,gene_01647.t1,gene_05417.t1,gene_00971.t1,gene_01800.t1,gene_06897.t1 | | chitin catabolic process | biological_process |
| GO:0030242 | 1 | gene_10456.t1 | | autophagy of peroxisome | biological_process |
| GO:0009088 | 4 | gene_06750.t1,gene_09231.t1,gene_03797.t1,gene_05635.t1 | | threonine biosynthetic process | biological_process |
| GO:0061587 | 1 | gene_07352.t1 | | transfer RNA gene-mediated silencing | biological_process |
| GO:0009086 | 5 | gene_07261.t1,gene_00382.t1,gene_05635.t1,gene_03115.t1,gene_02061.t1 | | methionine biosynthetic process | biological_process |
| GO:0009082 | 3 | gene_09326.t1,gene_00766.t1,gene_00557.t1 | | branched-chain amino acid biosynthetic process | biological_process |
| GO:0051382 | 4 | gene_04179.t1,gene_05640.t1,gene_09382.t1,gene_01877.t1 | | kinetochore assembly | biological_process |
| GO:0046952 | 2 | gene_02317.t1,gene_10319.t1 | | ketone body catabolic process | biological_process |
| GO:0018279 | 1 | gene_08010.t1 | | protein N-linked glycosylation via asparagine | biological_process |

**Table S3 Detailed Gene Ontology (GO) classification of protein families in the genome of *P. paneum* OM1 (*Continued*)**

| **GO ID** | **Seq Num** | | **Seq List** | **GO term** | **Category** |
| --- | --- | --- | --- | --- | --- |
| GO:0019588 | 2 | gene_08527.t1,gene_10503.t1 | | anaerobic glycerol catabolic process | biological_process |
| GO:0007264 | 15 | gene_07243.t1,gene_09005.t1,gene_00826.t1,gene_07007.t1,gene_09833.t1,gene_03010.t1,gene_01559.t1,gene_06269.t1,gene_09341.t1,gene_06153.t1,gene_09397.t1,gene_01592.t1,gene_08588.t1,gene_02435.t1,gene_03755.t1 | | small GTPase mediated signal transduction | biological_process |
| GO:0070481 | 1 | gene_02565.t1 | | nuclear-transcribed mRNA catabolic process, non-stop decay | biological_process |
| GO:0046514 | 1 | gene_02496.t1 | | ceramide catabolic process | biological_process |
| GO:0006996 | 1 | gene_01675.t1 | | organelle organization | biological_process |
| GO:0044238 | 3 | gene_05779.t1,gene_10246.t1,gene_07001.t1 | | primary metabolic process | biological_process |
| GO:0006998 | 1 | gene_03348.t1 | | nuclear envelope organization | biological_process |
| GO:0035998 | 1 | gene_07926.t1 | | 7,8-dihydroneopterin 3'-triphosphate biosynthetic process | biological_process |
| GO:0051568 | 1 | gene_02323.t1 | | histone H3-K4 methylation | biological_process |
| GO:0000455 | 1 | gene_02854.t1 | | enzyme-directed rRNA pseudouridine synthesis | biological_process |
| GO:0071840 | 2 | gene_09807.t1,gene_05084.t1 | | cellular component organization or biogenesis | biological_process |
| GO:0035065 | 1 | gene_00580.t1 | | regulation of histone acetylation | biological_process |
| GO:0032447 | 2 | gene_01562.t1,gene_05774.t1 | | protein urmylation | biological_process |
| GO:0001680 | 1 | gene_06335.t1 | | tRNA 3'-terminal CCA addition | biological_process |
| GO:0034470 | 2 | gene_00876.t1,gene_10176.t1 | | ncRNA processing | biological_process |
| GO:0042128 | 4 | gene_08724.t1,gene_08725.t1,gene_00906.t1,gene_08723.t1 | | nitrate assimilation | biological_process |
| GO:0007076 | 3 | gene_05995.t1,gene_07311.t1,gene_07793.t1 | | mitotic chromosome condensation | biological_process |
| GO:0016052 | 12 | gene_06443.t1,gene_05243.t1,gene_00477.t1,gene_06442.t1,gene_04296.t1,gene_03422.t1,gene_04047.t1,gene_08370.t1,gene_01644.t1,gene_05379.t1,gene_00739.t1,gene_03426.t1 | | carbohydrate catabolic process | biological_process |
| GO:0019630 | 1 | gene_05589.t1 | | quinate metabolic process | biological_process |
| GO:0071266 | 1 | gene_01259.t1 | | 'de novo' L-methionine biosynthetic process | biological_process |
| GO:0034765 | 2 | gene_08146.t1,gene_05625.t1 | | regulation of ion transmembrane transport | biological_process |
| GO:0140042 | 1 | gene_08627.t1 | | lipid droplet formation | biological_process |
| GO:0019835 | 1 | gene_01789.t1 | | cytolysis | biological_process |
| GO:0019836 | 1 | gene_03264.t1 | | hemolysis by symbiont of host erythrocytes | biological_process |
| GO:0006189 | 9 | gene_07647.t1,gene_09629.t1,gene_10263.t1,gene_01843.t1,gene_08162.t1,gene_07232.t1,gene_09478.t1,gene_00429.t1,gene_00615.t1 | | 'de novo' IMP biosynthetic process | biological_process |

**Table S3 Detailed Gene Ontology (GO) classification of protein families in the genome of *P. paneum* OM1 (*Continued*)**

| **GO ID** | **Seq Num** | | **Seq List** | **GO term** | **Category** |
| --- | --- | --- | --- | --- | --- |
| GO:0006183 | 1 | gene_07884.t1 | | GTP biosynthetic process | biological_process |
| GO:0051603 | 11 | gene_00408.t1,gene_02486.t1,gene_01236.t1,gene_02375.t1,gene_07138.t1,gene_02420.t1,gene_04461.t1,gene_09929.t1,gene_05700.t1,gene_02372.t1,gene_03707.t1 | | proteolysis involved in cellular protein catabolic process | biological_process |
| GO:0051607 | 3 | gene_03396.t1,gene_06315.t1,gene_05841.t1 | | defense response to virus | biological_process |
| GO:0006545 | 1 | gene_01051.t1 | | glycine biosynthetic process | biological_process |
| GO:0009083 | 2 | gene_03837.t1,gene_03836.t1 | | branched-chain amino acid catabolic process | biological_process |
| GO:0006435 | 2 | gene_06643.t1,gene_10327.t1 | | threonyl-tRNA aminoacylation | biological_process |
| GO:0006434 | 2 | gene_09273.t1,gene_05654.t1 | | seryl-tRNA aminoacylation | biological_process |
| GO:0006437 | 2 | gene_07590.t1,gene_01435.t1 | | tyrosyl-tRNA aminoacylation | biological_process |
| GO:0006430 | 3 | gene_01636.t1,gene_03790.t1,gene_00005.t1 | | lysyl-tRNA aminoacylation | biological_process |
| GO:0006433 | 2 | gene_05564.t1,gene_06241.t1 | | prolyl-tRNA aminoacylation | biological_process |
| GO:0006432 | 3 | gene_03944.t1,gene_02682.t1,gene_02959.t1 | | phenylalanyl-tRNA aminoacylation | biological_process |
| GO:0006438 | 1 | gene_07409.t1 | | valyl-tRNA aminoacylation | biological_process |
| GO:0030150 | 4 | gene_06037.t1,gene_00476.t1,gene_09709.t1,gene_00730.t1 | | protein import into mitochondrial matrix | biological_process |
| GO:0032958 | 2 | gene_05749.t1,gene_05886.t1 | | inositol phosphate biosynthetic process | biological_process |
| GO:0042273 | 4 | gene_05458.t1,gene_06638.t1,gene_09219.t1,gene_09614.t1 | | ribosomal large subunit biogenesis | biological_process |
| GO:0042276 | 1 | gene_03610.t1 | | error-prone translesion synthesis | biological_process |
| GO:0042274 | 3 | gene_04402.t1,gene_01030.t1,gene_08049.t1 | | ribosomal small subunit biogenesis | biological_process |
| GO:0005980 | 1 | gene_00709.t1 | | glycogen catabolic process | biological_process |
| GO:0043001 | 1 | gene_02470.t1 | | Golgi to plasma membrane protein transport | biological_process |
| GO:0006506 | 21 | gene_09564.t1,gene_06610.t1,gene_00178.t1,gene_08086.t1,gene_09007.t1,gene_02846.t1,gene_08128.t1,gene_01263.t1,gene_00114.t1,gene_02076.t1,gene_02802.t1,gene_09726.t1,gene_00966.t1,gene_02482.t1,gene_06898.t1,gene_04734.t1,gene_00571.t1,gene_06068.t1,gene_02828.t1,gene_03239.t1,gene_10092.t1 | | GPI anchor biosynthetic process | biological_process |
| GO:0006508 | 1 | gene_06760.t1 | | proteolysis | biological_process |
| GO:0006729 | 1 | gene_07572.t1 | | tetrahydrobiopterin biosynthetic process | biological_process |
| GO:0006725 | 2 | gene_05541.t1,gene_00790.t1 | | cellular aromatic compound metabolic process | biological_process |
| GO:0098813 | 1 | gene_04251.t1 | | nuclear chromosome segregation | biological_process |

**Table S3 Detailed Gene Ontology (GO) classification of protein families in the genome of *P. paneum* OM1 (*Continued*)**

| **GO ID** | **Seq Num** | | **Seq List** | **GO term** | **Category** |
| --- | --- | --- | --- | --- | --- |
| GO:0048208 | 1 | gene_09511.t1 | | COPII vesicle coating | biological_process |
| GO:0009435 | 5 | gene_07903.t1,gene_03849.t1,gene_04641.t1,gene_07335.t1,gene_00373.t1 | | NAD biosynthetic process | biological_process |
| GO:0031204 | 2 | gene_02041.t1,gene_08267.t1 | | posttranslational protein targeting to membrane, translocation | biological_process |
| GO:0000105 | 7 | gene_09625.t1,gene_02123.t1,gene_08292.t1,gene_02197.t1,gene_01269.t1,gene_08515.t1,gene_04327.t1 | | histidine biosynthetic process | biological_process |
| GO:0000103 | 3 | gene_05577.t1,gene_06837.t1,gene_07261.t1 | | sulfate assimilation | biological_process |
| GO:2001295 | 1 | gene_01074.t1 | | malonyl-CoA biosynthetic process | biological_process |
| GO:0001522 | 8 | gene_10328.t1,gene_05787.t1,gene_09006.t1,gene_01896.t1,gene_02232.t1,gene_09251.t1,gene_04403.t1,gene_06280.t1 | | pseudouridine synthesis | biological_process |
| GO:1902979 | 1 | gene_06031.t1 | | mitotic DNA replication termination | biological_process |
| GO:0009102 | 2 | gene_09469.t1,gene_09462.t1 | | biotin biosynthetic process | biological_process |
| GO:1902751 | 1 | gene_09773.t1 | | positive regulation of cell cycle G2/M phase transition | biological_process |
| GO:0006857 | 5 | gene_05098.t1,gene_02896.t1,gene_02897.t1,gene_02895.t1,gene_03872.t1 | | oligopeptide transport | biological_process |
| GO:0006850 | 2 | gene_01367.t1,gene_00788.t1 | | mitochondrial pyruvate transmembrane transport | biological_process |
| GO:0009058 | 23 | gene_08666.t1,gene_08222.t1,gene_00462.t1,gene_04762.t1,gene_10447.t1,gene_02648.t1,gene_03559.t1,gene_05306.t1,gene_10105.t1,gene_05313.t1,gene_01337.t1,gene_01491.t1,gene_00862.t1,gene_00460.t1,gene_08102.t1,gene_06074.t1,gene_02149.t1,gene_03736.t1,gene_03995.t1,gene_10303.t1,gene_10066.t1,gene_01932.t1,gene_06828.t1 | | biosynthetic process | biological_process |
| GO:0009052 | 1 | gene_06446.t1 | | pentose-phosphate shunt, non-oxidative branch | biological_process |
| GO:0000070 | 3 | gene_07290.t1,gene_03245.t1,gene_10602.t1 | | mitotic sister chromatid segregation | biological_process |
| GO:0000077 | 6 | gene_05805.t1,gene_00573.t1,gene_08500.t1,gene_09512.t1,gene_08078.t1,gene_10279.t1 | | DNA damage checkpoint signaling | biological_process |
| GO:0000076 | 1 | gene_01226.t1 | | DNA replication checkpoint signaling | biological_process |
| GO:0000079 | 6 | gene_03270.t1,gene_08489.t1,gene_01190.t1,gene_04106.t1,gene_00900.t1,gene_03261.t1 | | regulation of cyclin-dependent protein serine/threonine kinase activity | biological_process |
| GO:0055070 | 1 | gene_01837.t1 | | copper ion homeostasis | biological_process |
| GO:0055072 | 4 | gene_03446.t1,gene_04745.t1,gene_08986.t1,gene_02448.t1 | | iron ion homeostasis | biological_process |
| GO:0006986 | 1 | gene_02005.t1 | | response to unfolded protein | biological_process |
| GO:0044208 | 2 | gene_07647.t1,gene_01989.t1 | | 'de novo' AMP biosynthetic process | biological_process |
| GO:0044209 | 2 | gene_08031.t1,gene_08329.t1 | | AMP salvage | biological_process |

**Table S3 Detailed Gene Ontology (GO) classification of protein families in the genome of *P. paneum* OM1 (*Continued*)**

| **GO ID** | **Seq Num** | | **Seq List** | **GO term** | **Category** |
| --- | --- | --- | --- | --- | --- |
| GO:0044205 | 5 | gene_06540.t1,gene_01122.t1,gene_07023.t1,gene_01874.t1,gene_00647.t1 | | 'de novo' UMP biosynthetic process | biological_process |
| GO:0044206 | 1 | gene_09819.t1 | | UMP salvage | biological_process |
| GO:0042843 | 1 | gene_01649.t1 | | D-xylose catabolic process | biological_process |
| GO:0032780 | 1 | gene_02794.t1 | | negative regulation of ATP-dependent activity | biological_process |
| GO:0032784 | 1 | gene_01481.t1 | | regulation of DNA-templated transcription, elongation | biological_process |
| GO:0032786 | 1 | gene_08074.t1 | | positive regulation of DNA-templated transcription, elongation | biological_process |
| GO:0000462 | 2 | gene_03219.t1,gene_00707.t1 | | maturation of SSU-rRNA from tricistronic rRNA transcript (SSU-rRNA, 5.8S rRNA, LSU-rRNA) | biological_process |
| GO:0000463 | 4 | gene_01431.t1,gene_00423.t1,gene_05521.t1,gene_05207.t1 | | maturation of LSU-rRNA from tricistronic rRNA transcript (SSU-rRNA, 5.8S rRNA, LSU-rRNA) | biological_process |
| GO:0000466 | 3 | gene_01431.t1,gene_00423.t1,gene_05207.t1 | | maturation of 5.8S rRNA from tricistronic rRNA transcript (SSU-rRNA, 5.8S rRNA, LSU-rRNA) | biological_process |
| GO:0000469 | 1 | gene_04402.t1 | | cleavage involved in rRNA processing | biological_process |
| GO:0071852 | 2 | gene_09807.t1,gene_05084.t1 | | fungal-type cell wall organization or biogenesis | biological_process |
| GO:0071528 | 1 | gene_04234.t1 | | tRNA re-export from nucleus | biological_process |
| GO:0006044 | 2 | gene_09759.t1,gene_09762.t1 | | N-acetylglucosamine metabolic process | biological_process |
| GO:0007064 | 5 | gene_09618.t1,gene_07202.t1,gene_10001.t1,gene_06314.t1,gene_06219.t1 | | mitotic sister chromatid cohesion | biological_process |
| GO:0007062 | 4 | gene_07290.t1,gene_00882.t1,gene_09867.t1,gene_00812.t1 | | sister chromatid cohesion | biological_process |
| GO:0016043 | 5 | gene_04603.t1,gene_03094.t1,gene_02689.t1,gene_05856.t1,gene_10381.t1 | | cellular component organization | biological_process |
| GO:0016042 | 23 | gene_03380.t1,gene_09152.t1,gene_04813.t1,gene_01468.t1,gene_07148.t1,gene_03672.t1,gene_05011.t1,gene_06777.t1,gene_02350.t1,gene_07324.t1,gene_07763.t1,gene_01166.t1,gene_01671.t1,gene_04991.t1,gene_06298.t1,gene_01773.t1,gene_00240.t1,gene_05193.t1,gene_05857.t1,gene_02999.t1,gene_08790.t1,gene_09933.t1,gene_05096.t1 | | lipid catabolic process | biological_process |
| GO:0033540 | 1 | gene_09140.t1 | | fatty acid beta-oxidation using acyl-CoA oxidase | biological_process |
| GO:0071985 | 2 | gene_01250.t1,gene_10159.t1 | | multivesicular body sorting pathway | biological_process |
| GO:0032012 | 4 | gene_07337.t1,gene_05829.t1,gene_09156.t1,gene_01064.t1 | | regulation of ARF protein signal transduction | biological_process |
| GO:0032543 | 9 | gene_08587.t1,gene_06115.t1,gene_08109.t1,gene_10426.t1,gene_10358.t1,gene_03497.t1,gene_05707.t1,gene_04425.t1,gene_02324.t1 | | mitochondrial translation | biological_process |
| GO:0019805 | 4 | gene_00551.t1,gene_02644.t1,gene_04082.t1,gene_07394.t1 | | quinolinate biosynthetic process | biological_process |

**Table S3 Detailed Gene Ontology (GO) classification of protein families in the genome of *P. paneum* OM1 (*Continued*)**

| **GO ID** | **Seq Num** | | **Seq List** | **GO term** | **Category** |
| --- | --- | --- | --- | --- | --- |
| GO:0006168 | 1 | gene_08329.t1 | | adenine salvage | biological_process |
| GO:0015936 | 1 | gene_02693.t1 | | coenzyme A metabolic process | biological_process |
| GO:0015937 | 3 | gene_06901.t1,gene_07765.t1,gene_06905.t1 | | coenzyme A biosynthetic process | biological_process |
| GO:0016310 | 1 | gene_00398.t1 | | phosphorylation | biological_process |
| GO:0034314 | 5 | gene_06990.t1,gene_05874.t1,gene_07743.t1,gene_02382.t1,gene_03091.t1 | | Arp2/3 complex-mediated actin nucleation | biological_process |
| GO:0034316 | 1 | gene_05913.t1 | | negative regulation of Arp2/3 complex-mediated actin nucleation | biological_process |
| GO:0006221 | 1 | gene_06009.t1 | | pyrimidine nucleotide biosynthetic process | biological_process |
| GO:0006226 | 1 | gene_01001.t1 | | dUMP biosynthetic process | biological_process |
| GO:0006228 | 1 | gene_07884.t1 | | UTP biosynthetic process | biological_process |
| GO:0008612 | 2 | gene_09824.t1,gene_07731.t1 | | peptidyl-lysine modification to peptidyl-hypusine | biological_process |
| GO:0046785 | 1 | gene_10486.t1 | | microtubule polymerization | biological_process |
| GO:0008610 | 8 | gene_09714.t1,gene_06616.t1,gene_01745.t1,gene_07976.t1,gene_09463.t1,gene_05622.t1,gene_01218.t1,gene_04514.t1 | | lipid biosynthetic process | biological_process |
| GO:0034551 | 1 | gene_10320.t1 | | mitochondrial respiratory chain complex III assembly | biological_process |
| GO:0046168 | 1 | gene_00708.t1 | | glycerol-3-phosphate catabolic process | biological_process |
| GO:0031929 | 4 | gene_00561.t1,gene_05323.t1,gene_03147.t1,gene_04143.t1 | | TOR signaling | biological_process |
| GO:0031146 | 2 | gene_01746.t1,gene_02629.t1 | | SCF-dependent proteasomal ubiquitin-dependent protein catabolic process | biological_process |
| GO:0031145 | 4 | gene_09747.t1,gene_02065.t1,gene_02001.t1,gene_04135.t1 | | anaphase-promoting complex-dependent catabolic process | biological_process |
| GO:0031144 | 1 | gene_00356.t1 | | proteasome localization | biological_process |
| GO:0045892 | 7 | gene_10177.t1,gene_05523.t1,gene_03104.t1,gene_04231.t1,gene_09874.t1,gene_10405.t1,gene_08663.t1 | | negative regulation of transcription, DNA-templated | biological_process |
| GO:0010833 | 1 | gene_03799.t1 | | telomere maintenance via telomere lengthening | biological_process |
| GO:0045493 | 4 | gene_05825.t1,gene_10598.t1,gene_08100.t1,gene_00132.t1 | | xylan catabolic process | biological_process |
| GO:0006084 | 1 | gene_03020.t1 | | acetyl-CoA metabolic process | biological_process |
| GO:0006085 | 1 | gene_03086.t1 | | acetyl-CoA biosynthetic process | biological_process |
| GO:0006086 | 2 | gene_02327.t1,gene_04096.t1 | | acetyl-CoA biosynthetic process from pyruvate | biological_process |
| GO:0006081 | 2 | gene_10347.t1,gene_00823.t1 | | cellular aldehyde metabolic process | biological_process |
| GO:0006082 | 5 | gene_02510.t1,gene_03086.t1,gene_01843.t1,gene_09272.t1,gene_04129.t1 | | organic acid metabolic process | biological_process |

**Table S3 Detailed Gene Ontology (GO) classification of protein families in the genome of *P. paneum* OM1 (*Continued*)**

| **GO ID** | **Seq Num** | | **Seq List** | **GO term** | **Category** |
| --- | --- | --- | --- | --- | --- |
| GO:0006083 | 1 | gene_00257.t1 | | acetate metabolic process | biological_process |
| GO:0005993 | 1 | gene_10343.t1 | | trehalose catabolic process | biological_process |
| GO:0005992 | 7 | gene_07341.t1,gene_10489.t1,gene_06003.t1,gene_02593.t1,gene_03347.t1,gene_07446.t1,gene_07447.t1 | | trehalose biosynthetic process | biological_process |
| GO:0006535 | 2 | gene_07794.t1,gene_01192.t1 | | cysteine biosynthetic process from serine | biological_process |
| GO:0045944 | 16 | gene_07125.t1,gene_06826.t1,gene_09262.t1,gene_04840.t1,gene_10396.t1,gene_02321.t1,gene_04922.t1,gene_05064.t1,gene_03104.t1,gene_05048.t1,gene_04902.t1,gene_04970.t1,gene_02778.t1,gene_04914.t1,gene_04974.t1,gene_00891.t1 | | positive regulation of transcription by RNA polymerase II | biological_process |
| GO:0000266 | 1 | gene_03586.t1 | | mitochondrial fission | biological_process |
| GO:0090304 | 1 | gene_09851.t1 | | nucleic acid metabolic process | biological_process |
| GO:0052837 | 1 | gene_09923.t1 | | thiazole biosynthetic process | biological_process |
| GO:0006400 | 3 | gene_05668.t1,gene_09687.t1,gene_02115.t1 | | tRNA modification | biological_process |
| GO:0043103 | 1 | gene_01718.t1 | | hypoxanthine salvage | biological_process |
| GO:0006402 | 2 | gene_04448.t1,gene_10141.t1 | | mRNA catabolic process | biological_process |
| GO:0006406 | 5 | gene_08105.t1,gene_08779.t1,gene_05183.t1,gene_10171.t1,gene_08906.t1 | | mRNA export from nucleus | biological_process |
| GO:0009423 | 3 | gene_02444.t1,gene_02892.t1,gene_02251.t1 | | chorismate biosynthetic process | biological_process |
| GO:0000002 | 8 | gene_00455.t1,gene_06102.t1,gene_06097.t1,gene_04131.t1,gene_04067.t1,gene_06112.t1,gene_02094.t1,gene_09579.t1 | | mitochondrial genome maintenance | biological_process |
| GO:0000001 | 1 | gene_02370.t1 | | mitochondrion inheritance | biological_process |
| GO:1902412 | 1 | gene_10602.t1 | | regulation of mitotic cytokinesis | biological_process |
| GO:0044211 | 1 | gene_09819.t1 | | CTP salvage | biological_process |
| GO:0044210 | 2 | gene_09562.t1,gene_01363.t1 | | 'de novo' CTP biosynthetic process | biological_process |
| GO:0032220 | 2 | gene_10068.t1,gene_06790.t1 | | plasma membrane fusion involved in cytogamy | biological_process |
| GO:0006337 | 1 | gene_05665.t1 | | nucleosome disassembly | biological_process |
| GO:0018142 | 1 | gene_10392.t1 | | protein-DNA covalent cross-linking | biological_process |
| GO:0032790 | 2 | gene_05458.t1,gene_08109.t1 | | ribosome disassembly | biological_process |
| GO:0000470 | 1 | gene_07417.t1 | | maturation of LSU-rRNA | biological_process |

**Table S3 Detailed Gene Ontology (GO) classification of protein families in the genome of *P. paneum* OM1 (*Continued*)**

| **GO ID** | **Seq Num** | | **Seq List** | **GO term** | **Category** |
| --- | --- | --- | --- | --- | --- |
| GO:0006888 | 11 | gene_03939.t1,gene_09282.t1,gene_09487.t1,gene_01071.t1,gene_05520.t1,gene_02093.t1,gene_09223.t1,gene_00033.t1,gene_03214.t1,gene_02368.t1,gene_10522.t1 | | endoplasmic reticulum to Golgi vesicle-mediated transport | biological_process |
| GO:0000902 | 4 | gene_06759.t1,gene_01282.t1,gene_08716.t1,gene_06490.t1 | | cell morphogenesis | biological_process |
| GO:0006885 | 1 | gene_04349.t1 | | regulation of pH | biological_process |
| GO:0006886 | 48 | gene_07093.t1,gene_02540.t1,gene_10007.t1,gene_02093.t1,gene_05346.t1,gene_05393.t1,gene_03667.t1,gene_09193.t1,gene_06397.t1,gene_03214.t1,gene_08919.t1,gene_05895.t1,gene_10348.t1,gene_00505.t1,gene_00582.t1,gene_06223.t1,gene_10522.t1,gene_05672.t1,gene_01017.t1,gene_06756.t1,gene_02252.t1,gene_02853.t1,gene_01668.t1,gene_03881.t1,gene_03659.t1,gene_01313.t1,gene_05391.t1,gene_09722.t1,gene_03142.t1,gene_07361.t1,gene_03925.t1,gene_04059.t1,gene_04556.t1,gene_01372.t1,gene_08040.t1,gene_09165.t1,gene_00350.t1,gene_09100.t1,gene_00554.t1,gene_04579.t1,gene_10480.t1,gene_07106.t1,gene_06125.t1,gene_06752.t1,gene_04061.t1,gene_10184.t1,gene_09561.t1,gene_08669.t1 | | intracellular protein transport | biological_process |
| GO:0006887 | 7 | gene_05127.t1,gene_08719.t1,gene_07646.t1,gene_03986.t1,gene_06544.t1,gene_01590.t1,gene_00718.t1 | | exocytosis | biological_process |
| GO:0008643 | 11 | gene_02940.t1,gene_05144.t1,gene_02541.t1,gene_08773.t1,gene_09248.t1,gene_05223.t1,gene_05802.t1,gene_06570.t1,gene_00179.t1,gene_03306.t1,gene_04756.t1 | | carbohydrate transport | biological_process |
| GO:0000453 | 1 | gene_05806.t1 | | enzyme-directed rRNA 2'-O-methylation | biological_process |
| GO:0051560 | 1 | gene_04031.t1 | | mitochondrial calcium ion homeostasis | biological_process |
| GO:0007051 | 1 | gene_10486.t1 | | spindle organization | biological_process |
| GO:0007052 | 2 | gene_06154.t1,gene_08279.t1 | | mitotic spindle organization | biological_process |
| GO:0007059 | 10 | gene_07001.t1,gene_07003.t1,gene_08597.t1,gene_05155.t1,gene_03476.t1,gene_06154.t1,gene_09061.t1,gene_05168.t1,gene_06720.t1,gene_09382.t1 | | chromosome segregation | biological_process |
| GO:0016070 | 3 | gene_09702.t1,gene_06034.t1,gene_02995.t1 | | RNA metabolic process | biological_process |
| GO:0016075 | 2 | gene_04160.t1,gene_08713.t1 | | rRNA catabolic process | biological_process |
| GO:0015074 | 9 | gene_02212.t1,gene_08700.t1,gene_01274.t1,gene_06867.t1,gene_06866.t1,gene_08699.t1,gene_01958.t1,gene_10675.t1,gene_02023.t1 | | DNA integration | biological_process |
| GO:0071467 | 1 | gene_00092.t1 | | cellular response to pH | biological_process |
| GO:0032008 | 2 | gene_03887.t1,gene_02775.t1 | | positive regulation of TOR signaling | biological_process |
| GO:0032007 | 1 | gene_05367.t1 | | negative regulation of TOR signaling | biological_process |

**Table S3 Detailed Gene Ontology (GO) classification of protein families in the genome of *P. paneum* OM1 (*Continued*)**

| **GO ID** | **Seq Num** | | **Seq List** | **GO term** | **Category** |
| --- | --- | --- | --- | --- | --- |
| GO:0016095 | 1 | gene_02943.t1 | | polyprenol catabolic process | biological_process |
| GO:0043248 | 4 | gene_02386.t1,gene_01921.t1,gene_09570.t1,gene_08397.t1 | | proteasome assembly | biological_process |
| GO:0042632 | 1 | gene_03887.t1 | | cholesterol homeostasis | biological_process |
| GO:0030951 | 1 | gene_10486.t1 | | establishment or maintenance of microtubule cytoskeleton polarity | biological_process |
| GO:0043488 | 2 | gene_01674.t1,gene_03979.t1 | | regulation of mRNA stability | biological_process |
| GO:0043486 | 3 | gene_09848.t1,gene_03694.t1,gene_01406.t1 | | histone exchange | biological_process |
| GO:0019354 | 2 | gene_06837.t1,gene_09155.t1 | | siroheme biosynthetic process | biological_process |
| GO:0000493 | 1 | gene_02232.t1 | | box H/ACA snoRNP assembly | biological_process |
| GO:0000492 | 1 | gene_03290.t1 | | box C/D snoRNP assembly | biological_process |
| GO:0045048 | 3 | gene_07236.t1,gene_05695.t1,gene_09701.t1 | | protein insertion into ER membrane | biological_process |
| GO:0046373 | 3 | gene_01362.t1,gene_00037.t1,gene_05400.t1 | | L-arabinose metabolic process | biological_process |
| GO:0006235 | 1 | gene_01301.t1 | | dTTP biosynthetic process | biological_process |
| GO:0006233 | 1 | gene_07888.t1 | | dTDP biosynthetic process | biological_process |
| GO:0006231 | 1 | gene_01301.t1 | | dTMP biosynthetic process | biological_process |
| GO:0016255 | 4 | gene_03868.t1,gene_01979.t1,gene_01432.t1,gene_02656.t1 | | attachment of GPI anchor to protein | biological_process |
| GO:0070816 | 1 | gene_09119.t1 | | phosphorylation of RNA polymerase II C-terminal domain | biological_process |
| GO:0006099 | 17 | gene_10230.t1,gene_06798.t1,gene_08720.t1,gene_09160.t1,gene_08431.t1,gene_00860.t1,gene_07453.t1,gene_02452.t1,gene_09730.t1,gene_07137.t1,gene_04330.t1,gene_02366.t1,gene_09444.t1,gene_01319.t1,gene_10491.t1,gene_04426.t1,gene_07350.t1 | | tricarboxylic acid cycle | biological_process |
| GO:0006098 | 7 | gene_03675.t1,gene_00043.t1,gene_04418.t1,gene_03823.t1,gene_00992.t1,gene_07980.t1,gene_06816.t1 | | pentose-phosphate shunt | biological_process |
| GO:0045047 | 1 | gene_07756.t1 | | protein targeting to ER | biological_process |
| GO:0006090 | 3 | gene_06471.t1,gene_01374.t1,gene_09157.t1 | | pyruvate metabolic process | biological_process |
| GO:0006097 | 1 | gene_09444.t1 | | glyoxylate cycle | biological_process |
| GO:0006096 | 15 | gene_05462.t1,gene_06196.t1,gene_07758.t1,gene_00648.t1,gene_00838.t1,gene_00479.t1,gene_03040.t1,gene_02419.t1,gene_09875.t1,gene_06480.t1,gene_06014.t1,gene_00524.t1,gene_06111.t1,gene_09513.t1,gene_03194.t1 | | glycolytic process | biological_process |
| GO:0006094 | 7 | gene_03687.t1,gene_00648.t1,gene_01374.t1,gene_06111.t1,gene_00479.t1,gene_06471.t1,gene_03779.t1 | | gluconeogenesis | biological_process |

**Table S3 Detailed Gene Ontology (GO) classification of protein families in the genome of *P. paneum* OM1 (*Continued*)**

| **GO ID** | **Seq Num** | | **Seq List** | **GO term** | **Category** |
| --- | --- | --- | --- | --- | --- |
| GO:0006529 | 2 | gene_00321.t1,gene_10129.t1 | | asparagine biosynthetic process | biological_process |
| GO:0006520 | 13 | gene_05315.t1,gene_00359.t1,gene_03995.t1,gene_00460.t1,gene_00088.t1,gene_02277.t1,gene_10080.t1,gene_09401.t1,gene_00510.t1,gene_05313.t1,gene_05306.t1,gene_00862.t1,gene_01381.t1 | | cellular amino acid metabolic process | biological_process |
| GO:0006526 | 5 | gene_00813.t1,gene_03625.t1,gene_04583.t1,gene_06573.t1,gene_07598.t1 | | arginine biosynthetic process | biological_process |
| GO:0006525 | 1 | gene_05706.t1 | | arginine metabolic process | biological_process |
| GO:1990544 | 1 | gene_02936.t1 | | mitochondrial ATP transmembrane transport | biological_process |
| GO:1990547 | 4 | gene_07220.t1,gene_06091.t1,gene_01931.t1,gene_07633.t1 | | mitochondrial phosphate ion transmembrane transport | biological_process |
| GO:0000278 | 7 | gene_07003.t1,gene_08597.t1,gene_06720.t1,gene_05155.t1,gene_03476.t1,gene_00422.t1,gene_01875.t1 | | mitotic cell cycle | biological_process |
| GO:0000272 | 45 | gene_00945.t1,gene_01578.t1,gene_08437.t1,gene_07912.t1,gene_07875.t1,gene_06552.t1,gene_00176.t1,gene_04755.t1,gene_05687.t1,gene_06586.t1,gene_01798.t1,gene_10573.t1,gene_03424.t1,gene_02291.t1,gene_03030.t1,gene_01799.t1,gene_01845.t1,gene_06777.t1,gene_01037.t1,gene_09452.t1,gene_03902.t1,gene_07226.t1,gene_09758.t1,gene_03906.t1,gene_03719.t1,gene_05104.t1,gene_01797.t1,gene_00439.t1,gene_05417.t1,gene_02142.t1,gene_01759.t1,gene_04380.t1,gene_02620.t1,gene_04222.t1,gene_02922.t1,gene_04464.t1,gene_06768.t1,gene_06897.t1,gene_10353.t1,gene_01647.t1,gene_04322.t1,gene_07460.t1,gene_00971.t1,gene_01800.t1,gene_01801.t1 | | polysaccharide catabolic process | biological_process |
| GO:0031047 | 10 | gene_05887.t1,gene_03396.t1,gene_07978.t1,gene_06315.t1,gene_05659.t1,gene_05841.t1,gene_06857.t1,gene_10383.t1,gene_08120.t1,gene_00284.t1 | | gene silencing by RNA | biological_process |
| GO:0072344 | 2 | gene_00722.t1,gene_02227.t1 | | rescue of stalled ribosome | biological_process |
| GO:0006487 | 7 | gene_04999.t1,gene_01969.t1,gene_10658.t1,gene_02904.t1,gene_04805.t1,gene_09530.t1,gene_05113.t1 | | protein N-linked glycosylation | biological_process |
| GO:0006417 | 7 | gene_03653.t1,gene_01161.t1,gene_08626.t1,gene_05791.t1,gene_01605.t1,gene_07953.t1,gene_07305.t1 | | regulation of translation | biological_process |
| GO:0006415 | 2 | gene_05458.t1,gene_07129.t1 | | translational termination | biological_process |
| GO:0006414 | 1 | gene_02457.t1 | | translational elongation | biological_process |

**Table S3 Detailed Gene Ontology (GO) classification of protein families in the genome of *P. paneum* OM1 (*Continued*)**

| **GO ID** | **Seq Num** | | **Seq List** | **GO term** | **Category** |
| --- | --- | --- | --- | --- | --- |
| GO:0006412 | 103 | gene_01069.t1,gene_09911.t1,gene_09037.t1,gene_06615.t1,gene_06639.t1,gene_01143.t1,gene_03172.t1,gene_10488.t1,gene_00424.t1,gene_02603.t1,gene_05698.t1,gene_04610.t1,gene_09278.t1,gene_03284.t1,gene_05166.t1,gene_05235.t1,gene_01386.t1,gene_03883.t1,gene_05845.t1,gene_02997.t1,gene_06369.t1,gene_09718.t1,gene_05192.t1,gene_02965.t1,gene_01678.t1,gene_10173.t1,gene_04441.t1,gene_02931.t1,gene_05390.t1,gene_01327.t1,gene_02684.t1,gene_03088.t1,gene_06815.t1,gene_08346.t1,gene_03269.t1,gene_02469.t1,gene_07654.t1,gene_00559.t1,gene_08396.t1,gene_07950.t1,gene_02779.t1,gene_09004.t1,gene_06282.t1,gene_04091.t1,gene_07081.t1,gene_03168.t1,gene_01160.t1,gene_03653.t1,gene_08037.t1,gene_08736.t1,gene_01369.t1,gene_05521.t1,gene_00402.t1,gene_06842.t1,gene_07006.t1,gene_01094.t1,gene_04098.t1,gene_05623.t1,gene_02536.t1,gene_05838.t1,gene_02167.t1,gene_01594.t1,gene_00401.t1,gene_06873.t1,gene_04240.t1,gene_07619.t1,gene_06874.t1,gene_02637.t1,gene_01723.t1,gene_01417.t1,gene_05876.t1,gene_04719.t1,gene_09259.t1,gene_09745.t1,gene_08514.t1,gene_10591.t1,gene_10017.t1,gene_00539.t1,gene_00520.t1,gene_08028.t1,gene_09731.t1,gene_02556.t1,gene_01627.t1,gene_01599.t1,gene_03987.t1,gene_09486.t1,gene_04409.t1,gene_08547.t1,gene_09596.t1,gene_09003.t1,gene_09302.t1,gene_10540.t1,gene_05686.t1,gene_05885.t1,gene_00481.t1,gene_00592.t1,gene_06861.t1,gene_02434.t1,gene_01550.t1,gene_10532.t1,gene_06717.t1,gene_01010.t1,gene_02865.t1 | | translation | biological_process |
| GO:0006147 | 1 | gene_07694.t1 | | guanine catabolic process | biological_process |
| GO:0006146 | 1 | gene_01718.t1 | | adenine catabolic process | biological_process |
| GO:0009298 | 16 | gene_10287.t1,gene_03793.t1,gene_10100.t1,gene_01115.t1,gene_04976.t1,gene_03725.t1,gene_00023.t1,gene_05151.t1,gene_10469.t1,gene_01861.t1,gene_04903.t1,gene_10286.t1,gene_01454.t1,gene_02395.t1,gene_03919.t1,gene_08772.t1 | | GDP-mannose biosynthetic process | biological_process |
| GO:0001510 | 1 | gene_10176.t1 | | RNA methylation | biological_process |
| GO:0009072 | 2 | gene_05731.t1,gene_03811.t1 | | aromatic amino acid family metabolic process | biological_process |
| GO:0009073 | 5 | gene_00714.t1,gene_06027.t1,gene_02444.t1,gene_02892.t1,gene_02251.t1 | | aromatic amino acid family biosynthetic process | biological_process |
| GO:0006741 | 3 | gene_08533.t1,gene_09241.t1,gene_07119.t1 | | NADP biosynthetic process | biological_process |
| GO:0018027 | 1 | gene_09083.t1 | | peptidyl-lysine dimethylation | biological_process |
| GO:0045324 | 1 | gene_10095.t1 | | late endosome to vacuole transport | biological_process |
| GO:0045329 | 1 | gene_02485.t1 | | carnitine biosynthetic process | biological_process |

**Table S3 Detailed Gene Ontology (GO) classification of protein families in the genome of *P. paneum* OM1 (*Continued*)**

| **GO ID** | **Seq Num** | | **Seq List** | **GO term** | **Category** |
| --- | --- | --- | --- | --- | --- |
| GO:0051028 | 13 | gene_00974.t1,gene_09312.t1,gene_06461.t1,gene_01090.t1,gene_10042.t1,gene_09614.t1,gene_01688.t1,gene_09711.t1,gene_01605.t1,gene_08367.t1,gene_07305.t1,gene_00349.t1,gene_07017.t1 | | mRNA transport | biological_process |
| GO:0090173 | 1 | gene_07611.t1 | | regulation of synaptonemal complex assembly | biological_process |
| GO:0010142 | 1 | gene_03020.t1 | | farnesyl diphosphate biosynthetic process, mevalonate pathway | biological_process |
| GO:0006419 | 1 | gene_07680.t1 | | alanyl-tRNA aminoacylation | biological_process |
| GO:0019310 | 2 | gene_01340.t1,gene_00527.t1 | | inositol catabolic process | biological_process |
| GO:0001919 | 1 | gene_03887.t1 | | regulation of receptor recycling | biological_process |
| GO:0006893 | 3 | gene_04572.t1,gene_03048.t1,gene_08719.t1 | | Golgi to plasma membrane transport | biological_process |
| GO:0008652 | 10 | gene_06860.t1,gene_06027.t1,gene_09326.t1,gene_02444.t1,gene_09263.t1,gene_02892.t1,gene_00714.t1,gene_00766.t1,gene_02251.t1,gene_00557.t1 | | cellular amino acid biosynthetic process | biological_process |
| GO:0006891 | 5 | gene_03232.t1,gene_10290.t1,gene_05460.t1,gene_09555.t1,gene_02181.t1 | | intra-Golgi vesicle-mediated transport | biological_process |
| GO:0006890 | 7 | gene_08775.t1,gene_02033.t1,gene_05676.t1,gene_07213.t1,gene_01728.t1,gene_02521.t1,gene_10278.t1 | | retrograde vesicle-mediated transport, Golgi to endoplasmic reticulum | biological_process |
| GO:0006897 | 9 | gene_03881.t1,gene_10269.t1,gene_05990.t1,gene_00669.t1,gene_02165.t1,gene_07272.t1,gene_07381.t1,gene_04556.t1,gene_08752.t1 | | endocytosis | biological_process |
| GO:0043666 | 3 | gene_01199.t1,gene_10037.t1,gene_08172.t1 | | regulation of phosphoprotein phosphatase activity | biological_process |
| GO:0006895 | 1 | gene_03696.t1 | | Golgi to endosome transport | biological_process |
| GO:0008654 | 8 | gene_07485.t1,gene_00961.t1,gene_02039.t1,gene_06843.t1,gene_04684.t1,gene_07205.t1,gene_09574.t1,gene_01086.t1 | | phospholipid biosynthetic process | biological_process |
| GO:0032366 | 2 | gene_07028.t1,gene_07044.t1 | | intracellular sterol transport | biological_process |
| GO:0007040 | 1 | gene_03887.t1 | | lysosome organization | biological_process |
| GO:0055129 | 3 | gene_01216.t1,gene_02827.t1,gene_03398.t1 | | L-proline biosynthetic process | biological_process |
| GO:0032968 | 2 | gene_02334.t1,gene_07299.t1 | | positive regulation of transcription elongation from RNA polymerase II promoter | biological_process |
| GO:0007049 | 28 | gene_08710.t1,gene_05897.t1,gene_03094.t1,gene_07231.t1,gene_07822.t1,gene_05168.t1,gene_06735.t1,gene_04228.t1,gene_02001.t1,gene_02882.t1,gene_01226.t1,gene_04724.t1,gene_00515.t1,gene_02065.t1,gene_07862.t1,gene_05740.t1,gene_05883.t1,gene_02992.t1,gene_10449.t1,gene_01982.t1,gene_09071.t1,gene_08245.t1,gene_01007.t1,gene_07321.t1,gene_09773.t1,gene_09737.t1,gene_03236.t1,gene_09787.t1 | | cell cycle | biological_process |
| GO:0010564 | 2 | gene_00089.t1,gene_07370.t1 | | regulation of cell cycle process | biological_process |

**Table S3 Detailed Gene Ontology (GO) classification of protein families in the genome of *P. paneum* OM1 (*Continued*)**

| **GO ID** | **Seq Num** | | **Seq List** | **GO term** | **Category** |
| --- | --- | --- | --- | --- | --- |
| GO:0033566 | 1 | gene_05213.t1 | | gamma-tubulin complex localization | biological_process |
| GO:0070475 | 1 | gene_07288.t1 | | rRNA base methylation | biological_process |
| GO:0070476 | 1 | gene_02367.t1 | | rRNA (guanine-N7)-methylation | biological_process |
| GO:0007131 | 5 | gene_06455.t1,gene_05469.t1,gene_02751.t1,gene_08341.t1,gene_07316.t1 | | reciprocal meiotic recombination | biological_process |
| GO:0006413 | 1 | gene_05458.t1 | | translational initiation | biological_process |
| GO:0006479 | 6 | gene_08347.t1,gene_00499.t1,gene_05960.t1,gene_06651.t1,gene_01397.t1,gene_02726.t1 | | protein methylation | biological_process |
| GO:0034404 | 1 | gene_09266.t1 | | nucleobase-containing small molecule biosynthetic process | biological_process |
| GO:0071897 | 3 | gene_05677.t1,gene_01043.t1,gene_05811.t1 | | DNA biosynthetic process | biological_process |
| GO:0050992 | 1 | gene_06520.t1 | | dimethylallyl diphosphate biosynthetic process | biological_process |
| GO:0043386 | 8 | gene_05437.t1,gene_00185.t1,gene_09659.t1,gene_09661.t1,gene_09172.t1,gene_00195.t1,gene_06116.t1,gene_00183.t1 | | mycotoxin biosynthetic process | biological_process |
| GO:0030328 | 1 | gene_03186.t1 | | prenylcysteine catabolic process | biological_process |
| GO:0016539 | 1 | gene_02780.t1 | | intein-mediated protein splicing | biological_process |
| GO:1904668 | 3 | gene_09995.t1,gene_02100.t1,gene_07199.t1 | | positive regulation of ubiquitin protein ligase activity | biological_process |
| GO:1904669 | 1 | gene_07913.t1 | | ATP export | biological_process |
| GO:0031124 | 2 | gene_05890.t1,gene_01714.t1 | | mRNA 3'-end processing | biological_process |
| GO:0006418 | 1 | gene_01446.t1 | | tRNA aminoacylation for protein translation | biological_process |
| GO:0031123 | 1 | gene_01933.t1 | | RNA 3'-end processing | biological_process |
| GO:0030435 | 13 | gene_00512.t1,gene_09058.t1,gene_03685.t1,gene_00960.t1,gene_10384.t1,gene_05891.t1,gene_04321.t1,gene_01163.t1,gene_01650.t1,gene_00762.t1,gene_07116.t1,gene_02974.t1,gene_05793.t1 | | sporulation resulting in formation of a cellular spore | biological_process |
| GO:0030433 | 8 | gene_02817.t1,gene_00376.t1,gene_07380.t1,gene_10310.t1,gene_07313.t1,gene_04055.t1,gene_02421.t1,gene_02125.t1 | | ubiquitin-dependent ERAD pathway | biological_process |
| GO:0002098 | 10 | gene_00353.t1,gene_05774.t1,gene_05907.t1,gene_04181.t1,gene_01562.t1,gene_06853.t1,gene_09540.t1,gene_09706.t1,gene_09577.t1,gene_09082.t1 | | tRNA wobble uridine modification | biological_process |

**Table S3 Detailed Gene Ontology (GO) classification of protein families in the genome of *P. paneum* OM1 (*Continued*)**

| **GO ID** | **Seq Num** | | **Seq List** | **GO term** | **Category** |
| --- | --- | --- | --- | --- | --- |
| GO:0005975 | 125 | gene_00936.t1,gene_04418.t1,gene_00119.t1,gene_02770.t1,gene_09759.t1,gene_09962.t1,gene_02156.t1,gene_00100.t1,gene_09138.t1,gene_00708.t1,gene_05575.t1,gene_03025.t1,gene_01032.t1,gene_06929.t1,gene_03085.t1,gene_08997.t1,gene_00043.t1,gene_03230.t1,gene_00199.t1,gene_07809.t1,gene_00394.t1,gene_04069.t1,gene_07788.t1,gene_02817.t1,gene_08223.t1,gene_05651.t1,gene_06380.t1,gene_03481.t1,gene_04526.t1,gene_08993.t1,gene_02791.t1,gene_01454.t1,gene_02125.t1,gene_08927.t1,gene_06645.t1,gene_08468.t1,gene_03179.t1,gene_02551.t1,gene_01435.t1,gene_06681.t1,gene_07770.t1,gene_00082.t1,gene_04391.t1,gene_06881.t1,gene_08980.t1,gene_07991.t1,gene_02243.t1,gene_03444.t1,gene_08332.t1,gene_02102.t1,gene_09942.t1,gene_01013.t1,gene_07334.t1,gene_02421.t1,gene_02271.t1,gene_05091.t1,gene_09730.t1,gene_07652.t1,gene_09695.t1,gene_08467.t1,gene_10122.t1,gene_09762.t1,gene_03569.t1,gene_07845.t1,gene_08633.t1,gene_05720.t1,gene_02403.t1,gene_07399.t1,gene_08469.t1,gene_02920.t1,gene_05610.t1,gene_01725.t1,gene_04297.t1,gene_06714.t1,gene_10310.t1,gene_09160.t1,gene_02284.t1,gene_01835.t1,gene_07682.t1,gene_02885.t1,gene_00636.t1,gene_07980.t1,gene_00649.t1,gene_06470.t1,gene_10612.t1,gene_08772.t1,gene_05571.t1,gene_07881.t1,gene_00950.t1,gene_08481.t1,gene_07562.t1,gene_09669.t1,gene_08634.t1,gene_08898.t1,gene_07032.t1,gene_06341.t1,gene_05380.t1,gene_09961.t1,gene_07022.t1,gene_04055.t1,gene_03420.t1,gene_02188.t1,gene_02549.t1,gene_07540.t1,gene_04731.t1,gene_03404.t1,gene_02548.t1,gene_02481.t1,gene_09319.t1,gene_06903.t1,gene_03591.t1,gene_05650.t1,gene_09816.t1,gene_09941.t1,gene_05378.t1,gene_07473.t1,gene_05573.t1,gene_09960.t1,gene_06726.t1,gene_04664.t1,gene_09783.t1,gene_00992.t1,gene_01234.t1,gene_09538.t1,gene_04675.t1 | | carbohydrate metabolic process | biological_process |
| GO:0006559 | 4 | gene_03809.t1,gene_03807.t1,gene_10000.t1,gene_03810.t1 | | L-phenylalanine catabolic process | biological_process |
| GO:0005978 | 3 | gene_08420.t1,gene_07867.t1,gene_00709.t1 | | glycogen biosynthetic process | biological_process |
| GO:0006555 | 2 | gene_07024.t1,gene_07886.t1 | | methionine metabolic process | biological_process |
| GO:0006144 | 4 | gene_05694.t1,gene_07404.t1,gene_05784.t1,gene_00591.t1 | | purine nucleobase metabolic process | biological_process |
| GO:1900364 | 1 | gene_03979.t1 | | negative regulation of mRNA polyadenylation | biological_process |
| GO:0006396 | 21 | gene_04160.t1,gene_06123.t1,gene_06315.t1,gene_03396.t1,gene_05421.t1,gene_07393.t1,gene_00878.t1,gene_07733.t1,gene_09251.t1,gene_05841.t1,gene_04512.t1,gene_10354.t1,gene_05787.t1,gene_08713.t1,gene_00897.t1,gene_08623.t1,gene_03181.t1,gene_04425.t1,gene_02790.t1,gene_10512.t1,gene_08877.t1 | | RNA processing | biological_process |

**Table S3 Detailed Gene Ontology (GO) classification of protein families in the genome of *P. paneum* OM1 (*Continued*)**

| **GO ID** | **Seq Num** | | **Seq List** | **GO term** | **Category** |
| --- | --- | --- | --- | --- | --- |
| GO:0006397 | 40 | gene_09879.t1,gene_06622.t1,gene_00740.t1,gene_03219.t1,gene_08291.t1,gene_05664.t1,gene_01933.t1,gene_08924.t1,gene_01605.t1,gene_03454.t1,gene_03654.t1,gene_09407.t1,gene_08105.t1,gene_04131.t1,gene_02842.t1,gene_02699.t1,gene_00549.t1,gene_04238.t1,gene_00478.t1,gene_06051.t1,gene_09750.t1,gene_05976.t1,gene_07173.t1,gene_10208.t1,gene_08388.t1,gene_06365.t1,gene_06245.t1,gene_09859.t1,gene_02253.t1,gene_07082.t1,gene_08528.t1,gene_09536.t1,gene_07305.t1,gene_03541.t1,gene_02495.t1,gene_06417.t1,gene_06603.t1,gene_04534.t1,gene_01138.t1,gene_02175.t1 | | mRNA processing | biological_process |
| GO:0006777 | 6 | gene_06163.t1,gene_08455.t1,gene_02844.t1,gene_06655.t1,gene_04702.t1,gene_06930.t1 | | Mo-molybdopterin cofactor biosynthetic process | biological_process |
| GO:0006772 | 1 | gene_03103.t1 | | thiamine metabolic process | biological_process |
| GO:0000245 | 2 | gene_03530.t1,gene_00409.t1 | | spliceosomal complex assembly | biological_process |
| GO:0060249 | 1 | gene_03799.t1 | | anatomical structure homeostasis | biological_process |
| GO:0010960 | 1 | gene_03636.t1 | | magnesium ion homeostasis | biological_process |
| GO:0006177 | 2 | gene_04266.t1,gene_02686.t1 | | GMP biosynthetic process | biological_process |
| GO:0009448 | 1 | gene_08073.t1 | | gamma-aminobutyric acid metabolic process | biological_process |
| GO:0009446 | 2 | gene_00589.t1,gene_08117.t1 | | putrescine biosynthetic process | biological_process |
| GO:0006606 | 8 | gene_02554.t1,gene_10468.t1,gene_06251.t1,gene_07673.t1,gene_02029.t1,gene_09841.t1,gene_02002.t1,gene_08906.t1 | | protein import into nucleus | biological_process |
| GO:0009443 | 1 | gene_01000.t1 | | pyridoxal 5'-phosphate salvage | biological_process |
| GO:0006605 | 2 | gene_06869.t1,gene_06545.t1 | | protein targeting | biological_process |
| GO:0009450 | 1 | gene_01425.t1 | | gamma-aminobutyric acid catabolic process | biological_process |
| GO:0042450 | 1 | gene_07135.t1 | | arginine biosynthetic process via ornithine | biological_process |
| GO:0000398 | 25 | gene_02231.t1,gene_02996.t1,gene_07820.t1,gene_08914.t1,gene_02357.t1,gene_05449.t1,gene_05828.t1,gene_04086.t1,gene_07641.t1,gene_10212.t1,gene_02268.t1,gene_01054.t1,gene_03994.t1,gene_07996.t1,gene_09915.t1,gene_08685.t1,gene_06070.t1,gene_03076.t1,gene_02780.t1,gene_06855.t1,gene_07946.t1,gene_02972.t1,gene_06366.t1,gene_02203.t1,gene_08257.t1 | | mRNA splicing, via spliceosome | biological_process |
| GO:0045721 | 3 | gene_09250.t1,gene_08349.t1,gene_09820.t1 | | negative regulation of gluconeogenesis | biological_process |
| GO:0045292 | 8 | gene_08079.t1,gene_07256.t1,gene_01308.t1,gene_08612.t1,gene_09711.t1,gene_03864.t1,gene_05459.t1,gene_00318.t1 | | mRNA cis splicing, via spliceosome | biological_process |
| GO:0051103 | 2 | gene_07821.t1,gene_05811.t1 | | DNA ligation involved in DNA repair | biological_process |

**Table S3 Detailed Gene Ontology (GO) classification of protein families in the genome of *P. paneum* OM1 (*Continued*)**

| **GO ID** | **Seq Num** | | **Seq List** | **GO term** | **Category** |
| --- | --- | --- | --- | --- | --- |
| GO:0009063 | 2 | gene_00477.t1,gene_03435.t1 | | cellular amino acid catabolic process | biological_process |
| GO:0009062 | 1 | gene_04485.t1 | | fatty acid catabolic process | biological_process |
| GO:0009066 | 1 | gene_07958.t1 | | aspartate family amino acid metabolic process | biological_process |
| GO:0000027 | 4 | gene_09858.t1,gene_07417.t1,gene_06113.t1,gene_07628.t1 | | ribosomal large subunit assembly | biological_process |
| GO:0045053 | 2 | gene_07913.t1,gene_10095.t1 | | protein retention in Golgi apparatus | biological_process |
| GO:0006950 | 3 | gene_09620.t1,gene_09252.t1,gene_00746.t1 | | response to stress | biological_process |
| GO:0045333 | 1 | gene_02653.t1 | | cellular respiration | biological_process |
| GO:0045332 | 1 | gene_04164.t1 | | phospholipid translocation | biological_process |
| GO:0001678 | 6 | gene_06196.t1,gene_09513.t1,gene_00838.t1,gene_09875.t1,gene_06480.t1,gene_06014.t1 | | cellular glucose homeostasis | biological_process |
| GO:0048017 | 1 | gene_09152.t1 | | inositol lipid-mediated signaling | biological_process |
| GO:0000730 | 1 | gene_00330.t1 | | DNA recombinase assembly | biological_process |
| GO:0036297 | 1 | gene_04241.t1 | | interstrand cross-link repair | biological_process |
| GO:0032511 | 1 | gene_01023.t1 | | late endosome to vacuole transport via multivesicular body sorting pathway | biological_process |
| GO:0018160 | 1 | gene_05843.t1 | | peptidyl-pyrromethane cofactor linkage | biological_process |
| GO:0009712 | 4 | gene_02569.t1,gene_09653.t1,gene_06959.t1,gene_02177.t1 | | catechol-containing compound metabolic process | biological_process |
| GO:0018013 | 1 | gene_09083.t1 | | N-terminal peptidyl-glycine methylation | biological_process |
| GO:0070682 | 2 | gene_05203.t1,gene_10559.t1 | | proteasome regulatory particle assembly | biological_process |
| GO:0070681 | 2 | gene_02324.t1,gene_05707.t1 | | glutaminyl-tRNAGln biosynthesis via transamidation | biological_process |
| GO:0032979 | 1 | gene_07239.t1 | | protein insertion into mitochondrial inner membrane from matrix | biological_process |
| GO:2000601 | 1 | gene_00869.t1 | | positive regulation of Arp2/3 complex-mediated actin nucleation | biological_process |
| GO:0032974 | 3 | gene_03031.t1,gene_00063.t1,gene_08284.t1 | | amino acid transmembrane export from vacuole | biological_process |
| GO:0051259 | 1 | gene_07388.t1 | | protein complex oligomerization | biological_process |
| GO:0019303 | 1 | gene_07851.t1 | | D-ribose catabolic process | biological_process |
| GO:0034501 | 1 | gene_06875.t1 | | protein localization to kinetochore | biological_process |
| GO:0034508 | 2 | gene_06909.t1,gene_09546.t1 | | centromere complex assembly | biological_process |
| GO:0051052 | 1 | gene_02882.t1 | | regulation of DNA metabolic process | biological_process |

**Table S3 Detailed Gene Ontology (GO) classification of protein families in the genome of *P. paneum* OM1 (*Continued*)**

| **GO ID** | **Seq Num** | | **Seq List** | **GO term** | **Category** |
| --- | --- | --- | --- | --- | --- |
| GO:0043461 | 1 | gene_08317.t1 | | proton-transporting ATP synthase complex assembly | biological_process |
| GO:0015693 | 7 | gene_06075.t1,gene_04003.t1,gene_02147.t1,gene_09812.t1,gene_00870.t1,gene_01748.t1,gene_05086.t1 | | magnesium ion transport | biological_process |
| GO:0034613 | 2 | gene_08575.t1,gene_06343.t1 | | cellular protein localization | biological_process |
| GO:0051641 | 1 | gene_03575.t1 | | cellular localization | biological_process |
| GO:0042183 | 1 | gene_09683.t1 | | formate catabolic process | biological_process |
| GO:0007094 | 3 | gene_09780.t1,gene_09038.t1,gene_08841.t1 | | mitotic spindle assembly checkpoint signaling | biological_process |
| GO:0007095 | 1 | gene_04738.t1 | | mitotic G2 DNA damage checkpoint signaling | biological_process |
| GO:0007096 | 1 | gene_02992.t1 | | regulation of exit from mitosis | biological_process |
| GO:0046513 | 3 | gene_09343.t1,gene_09360.t1,gene_06384.t1 | | ceramide biosynthetic process | biological_process |
| GO:0050688 | 3 | gene_03396.t1,gene_06315.t1,gene_05841.t1 | | regulation of defense response to virus | biological_process |
| GO:0031116 | 1 | gene_02046.t1 | | positive regulation of microtubule polymerization | biological_process |
| GO:0035103 | 1 | gene_07195.t1 | | sterol regulatory element binding protein cleavage | biological_process |
| GO:0031119 | 1 | gene_01113.t1 | | tRNA pseudouridine synthesis | biological_process |
| GO:0006431 | 2 | gene_05182.t1,gene_01382.t1 | | methionyl-tRNA aminoacylation | biological_process |
| GO:0006546 | 2 | gene_05570.t1,gene_02293.t1 | | glycine catabolic process | biological_process |
| GO:0006541 | 14 | gene_06540.t1,gene_02361.t1,gene_08081.t1,gene_08292.t1,gene_08809.t1,gene_05948.t1,gene_08162.t1,gene_04134.t1,gene_09562.t1,gene_01088.t1,gene_01363.t1,gene_00321.t1,gene_03275.t1,gene_09668.t1 | | glutamine metabolic process | biological_process |
| GO:0006542 | 3 | gene_09443.t1,gene_10398.t1,gene_03301.t1 | | glutamine biosynthetic process | biological_process |
| GO:0006696 | 1 | gene_06489.t1 | | ergosterol biosynthetic process | biological_process |
| GO:0006388 | 2 | gene_04404.t1,gene_05344.t1 | | tRNA splicing, via endonucleolytic cleavage and ligation | biological_process |
| GO:0006384 | 4 | gene_09013.t1,gene_10633.t1,gene_06291.t1,gene_07840.t1 | | transcription initiation from RNA polymerase III promoter | biological_process |
| GO:0006383 | 4 | gene_01673.t1,gene_06259.t1,gene_04655.t1,gene_08095.t1 | | transcription by RNA polymerase III | biological_process |
| GO:0000256 | 3 | gene_03176.t1,gene_07404.t1,gene_05646.t1 | | allantoin catabolic process | biological_process |
| GO:0060255 | 1 | gene_09728.t1 | | regulation of macromolecule metabolic process | biological_process |
| GO:0030041 | 1 | gene_06990.t1 | | actin filament polymerization | biological_process |
| GO:0030042 | 3 | gene_08417.t1,gene_03932.t1,gene_00367.t1 | | actin filament depolymerization | biological_process |
| GO:0043137 | 1 | gene_07283.t1 | | DNA replication, removal of RNA primer | biological_process |

**Table S3 Detailed Gene Ontology (GO) classification of protein families in the genome of *P. paneum* OM1 (*Continued*)**

| **GO ID** | **Seq Num** | | **Seq List** | **GO term** | **Category** |
| --- | --- | --- | --- | --- | --- |
| GO:0006166 | 3 | gene_08031.t1,gene_08329.t1,gene_03822.t1 | | purine ribonucleoside salvage | biological_process |
| GO:1903373 | 1 | gene_03397.t1 | | positive regulation of endoplasmic reticulum tubular network organization | biological_process |
| GO:0036265 | 1 | gene_01679.t1 | | RNA (guanine-N7)-methylation | biological_process |
| GO:0000395 | 1 | gene_10367.t1 | | mRNA 5'-splice site recognition | biological_process |
| GO:0006611 | 2 | gene_06778.t1,gene_05152.t1 | | protein export from nucleus | biological_process |
| GO:0006612 | 1 | gene_04572.t1 | | protein targeting to membrane | biological_process |
| GO:0006614 | 7 | gene_09488.t1,gene_04006.t1,gene_07051.t1,gene_05782.t1,gene_01542.t1,gene_06620.t1,gene_04397.t1 | | SRP-dependent cotranslational protein targeting to membrane | biological_process |
| GO:0009272 | 2 | gene_05820.t1,gene_06043.t1 | | fungal-type cell wall biogenesis | biological_process |
| GO:0000387 | 6 | gene_03682.t1,gene_08079.t1,gene_10367.t1,gene_04011.t1,gene_07483.t1,gene_06158.t1 | | spliceosomal snRNP assembly | biological_process |
| GO:0051131 | 1 | gene_09415.t1 | | chaperone-mediated protein complex assembly | biological_process |
| GO:0006139 | 11 | gene_03964.t1,gene_08690.t1,gene_09473.t1,gene_09136.t1,gene_04107.t1,gene_02953.t1,gene_01224.t1,gene_01681.t1,gene_08293.t1,gene_00746.t1,gene_07299.t1 | | nucleobase-containing compound metabolic process | biological_process |
| GO:0042732 | 1 | gene_04233.t1 | | D-xylose metabolic process | biological_process |
| GO:0090114 | 2 | gene_09312.t1,gene_01017.t1 | | COPII-coated vesicle budding | biological_process |
| GO:0045041 | 1 | gene_04277.t1 | | protein import into mitochondrial intermembrane space | biological_process |
| GO:0045040 | 4 | gene_09579.t1,gene_02094.t1,gene_06805.t1,gene_06112.t1 | | protein insertion into mitochondrial outer membrane | biological_process |
| GO:0044249 | 5 | gene_07849.t1,gene_01185.t1,gene_05257.t1,gene_04763.t1,gene_03022.t1 | | cellular biosynthetic process | biological_process |
| GO:0019290 | 3 | gene_00532.t1,gene_01580.t1,gene_05504.t1 | | siderophore biosynthetic process | biological_process |
| GO:0000723 | 9 | gene_02991.t1,gene_04537.t1,gene_06252.t1,gene_08500.t1,gene_07898.t1,gene_06102.t1,gene_09591.t1,gene_10444.t1,gene_09891.t1 | | telomere maintenance | biological_process |
| GO:0000724 | 5 | gene_09111.t1,gene_00882.t1,gene_05469.t1,gene_03784.t1,gene_07343.t1 | | double-strand break repair via homologous recombination | biological_process |
| GO:0008380 | 17 | gene_10208.t1,gene_09750.t1,gene_08388.t1,gene_06365.t1,gene_04534.t1,gene_06603.t1,gene_05855.t1,gene_02495.t1,gene_00549.t1,gene_04238.t1,gene_09536.t1,gene_06051.t1,gene_08918.t1,gene_08576.t1,gene_09859.t1,gene_07305.t1,gene_08528.t1 | | RNA splicing | biological_process |
| GO:0018958 | 2 | gene_05109.t1,gene_06641.t1 | | phenol-containing compound metabolic process | biological_process |
| GO:0045454 | 3 | gene_04708.t1,gene_06691.t1,gene_02054.t1 | | cell redox homeostasis | biological_process |

**Table S3 Detailed Gene Ontology (GO) classification of protein families in the genome of *P. paneum* OM1 (*Continued*)**

| **GO ID** | **Seq Num** | | **Seq List** | **GO term** | **Category** |
| --- | --- | --- | --- | --- | --- |
| GO:0051315 | 1 | gene_08632.t1 | | attachment of mitotic spindle microtubules to kinetochore | biological_process |
| GO:0043604 | 1 | gene_04024.t1 | | amide biosynthetic process | biological_process |
| GO:0070072 | 4 | gene_07218.t1,gene_03177.t1,gene_09786.t1,gene_07263.t1 | | vacuolar proton-transporting V-type ATPase complex assembly | biological_process |
| GO:0046177 | 1 | gene_10185.t1 | | D-gluconate catabolic process | biological_process |
| GO:0070676 | 1 | gene_07913.t1 | | intralumenal vesicle formation | biological_process |
| GO:0034975 | 1 | gene_07528.t1 | | protein folding in endoplasmic reticulum | biological_process |
| GO:0060628 | 1 | gene_05676.t1 | | regulation of ER to Golgi vesicle-mediated transport | biological_process |
| GO:0070096 | 2 | gene_06805.t1,gene_06112.t1 | | mitochondrial outer membrane translocase complex assembly | biological_process |
| GO:0009249 | 3 | gene_06832.t1,gene_06846.t1,gene_02443.t1 | | protein lipoylation | biological_process |
| GO:0019752 | 9 | gene_06470.t1,gene_06682.t1,gene_00805.t1,gene_03700.t1,gene_09730.t1,gene_03988.t1,gene_10345.t1,gene_02156.t1,gene_05675.t1 | | carboxylic acid metabolic process | biological_process |
| GO:0071788 | 1 | gene_03397.t1 | | endoplasmic reticulum tubular network maintenance | biological_process |
| GO:0051260 | 1 | gene_06595.t1 | | protein homooligomerization | biological_process |
| GO:0019379 | 1 | gene_06830.t1 | | sulfate assimilation, phosphoadenylyl sulfate reduction by phosphoadenylyl-sulfate reductase (thioredoxin) | biological_process |
| GO:0071230 | 1 | gene_03887.t1 | | cellular response to amino acid stimulus | biological_process |
| GO:0101030 | 2 | gene_01300.t1,gene_07887.t1 | | tRNA-guanine transglycosylation | biological_process |
| GO:0019521 | 2 | gene_03823.t1,gene_03675.t1 | | D-gluconate metabolic process | biological_process |
| GO:0006072 | 3 | gene_03977.t1,gene_10097.t1,gene_05158.t1 | | glycerol-3-phosphate metabolic process | biological_process |
| GO:0005838 | 3 | gene_06760.t1,gene_06839.t1,gene_04185.t1 | | proteasome regulatory particle | cellular_component |
| GO:0005839 | 5 | gene_00408.t1,gene_09929.t1,gene_02375.t1,gene_02372.t1,gene_03707.t1 | | proteasome core complex | cellular_component |
| GO:0005834 | 2 | gene_03006.t1,gene_08745.t1 | | heterotrimeric G-protein complex | cellular_component |
| GO:0005835 | 2 | gene_02333.t1,gene_02332.t1 | | fatty acid synthase complex | cellular_component |
| GO:0005832 | 8 | gene_02559.t1,gene_07139.t1,gene_08963.t1,gene_03204.t1,gene_00738.t1,gene_03801.t1,gene_04092.t1,gene_06242.t1 | | chaperonin-containing T-complex | cellular_component |
| GO:1990131 | 2 | gene_06662.t1,gene_04423.t1 | | Gtr1-Gtr2 GTPase complex | cellular_component |
| GO:0005956 | 2 | gene_09329.t1,gene_05406.t1 | | protein kinase CK2 complex | cellular_component |
| GO:0140602 | 1 | gene_05249.t1 | | nucleolar ring | cellular_component |
| GO:0035550 | 1 | gene_01624.t1 | | urease complex | cellular_component |

**Table S3 Detailed Gene Ontology (GO) classification of protein families in the genome of *P. paneum* OM1 (*Continued*)**

| **GO ID** | **Seq Num** | | **Seq List** | **GO term** | **Category** |
| --- | --- | --- | --- | --- | --- |
| GO:0042555 | 6 | gene_00515.t1,gene_01710.t1,gene_01540.t1,gene_07862.t1,gene_08245.t1,gene_09071.t1 | | MCM complex | cellular_component |
| GO:0031251 | 2 | gene_03654.t1,gene_02175.t1 | | PAN complex | cellular_component |
| GO:0030677 | 3 | gene_06449.t1,gene_05910.t1,gene_10169.t1 | | ribonuclease P complex | cellular_component |
| GO:0010008 | 12 | gene_03659.t1,gene_05990.t1,gene_08752.t1,gene_00669.t1,gene_09062.t1,gene_03667.t1,gene_02072.t1,gene_03468.t1,gene_08349.t1,gene_07381.t1,gene_01023.t1,gene_07435.t1 | | endosome membrane | cellular_component |
| GO:0042720 | 2 | gene_09050.t1,gene_09110.t1 | | mitochondrial inner membrane peptidase complex | cellular_component |
| GO:0042729 | 9 | gene_10529.t1,gene_05877.t1,gene_03377.t1,gene_08597.t1,gene_05155.t1,gene_06154.t1,gene_08869.t1,gene_07276.t1,gene_03170.t1 | | DASH complex | cellular_component |
| GO:0031207 | 1 | gene_08267.t1 | | Sec62/Sec63 complex | cellular_component |
| GO:0045281 | 1 | gene_04426.t1 | | succinate dehydrogenase complex | cellular_component |
| GO:0070823 | 1 | gene_07896.t1 | | HDA1 complex | cellular_component |
| GO:0071339 | 1 | gene_00109.t1 | | MLL1 complex | cellular_component |
| GO:0005829 | 31 | gene_01674.t1,gene_02540.t1,gene_09731.t1,gene_04186.t1,gene_01627.t1,gene_00352.t1,gene_08108.t1,gene_06873.t1,gene_07863.t1,gene_06930.t1,gene_06774.t1,gene_09214.t1,gene_09903.t1,gene_06815.t1,gene_02853.t1,gene_04702.t1,gene_08590.t1,gene_08455.t1,gene_08132.t1,gene_02536.t1,gene_04240.t1,gene_06717.t1,gene_06399.t1,gene_03696.t1,gene_08346.t1,gene_01386.t1,gene_04719.t1,gene_09923.t1,gene_03468.t1,gene_02227.t1,gene_08974.t1 | | cytosol | cellular_component |
| GO:0005853 | 1 | gene_05617.t1 | | eukaryotic translation elongation factor 1 complex | cellular_component |
| GO:0030289 | 1 | gene_10264.t1 | | protein phosphatase 4 complex | cellular_component |
| GO:0016363 | 3 | gene_08417.t1,gene_03932.t1,gene_00367.t1 | | nuclear matrix | cellular_component |
| GO:0030663 | 1 | gene_00582.t1 | | COPI-coated vesicle membrane | cellular_component |
| GO:0031390 | 2 | gene_10001.t1,gene_06219.t1 | | Ctf18 RFC-like complex | cellular_component |
| GO:0031391 | 3 | gene_09699.t1,gene_07744.t1,gene_07212.t1 | | Elg1 RFC-like complex | cellular_component |
| GO:0000811 | 2 | gene_10241.t1,gene_10155.t1 | | GINS complex | cellular_component |
| GO:0042719 | 1 | gene_01635.t1 | | mitochondrial intermembrane space protein transporter complex | cellular_component |
| GO:0000172 | 5 | gene_00840.t1,gene_01748.t1,gene_05910.t1,gene_03157.t1,gene_08067.t1 | | ribonuclease MRP complex | cellular_component |

**Table S3 Detailed Gene Ontology (GO) classification of protein families in the genome of *P. paneum* OM1 (*Continued*)**

| **GO ID** | **Seq Num** | | **Seq List** | **GO term** | **Category** |
| --- | --- | --- | --- | --- | --- |
| GO:0031533 | 2 | gene_09829.t1,gene_01488.t1 | | mRNA cap methyltransferase complex | cellular_component |
| GO:0045271 | 1 | gene_10039.t1 | | respiratory chain complex I | cellular_component |
| GO:0045277 | 1 | gene_03222.t1 | | respiratory chain complex IV | cellular_component |
| GO:0070652 | 2 | gene_09991.t1,gene_10291.t1 | | HAUS complex | cellular_component |
| GO:0008290 | 1 | gene_07685.t1 | | F-actin capping protein complex | cellular_component |
| GO:0005868 | 1 | gene_08235.t1 | | cytoplasmic dynein complex | cellular_component |
| GO:0005654 | 6 | gene_09858.t1,gene_00423.t1,gene_01431.t1,gene_09214.t1,gene_07283.t1,gene_05207.t1 | | nucleoplasm | cellular_component |
| GO:0071439 | 1 | gene_01372.t1 | | clathrin complex | cellular_component |
| GO:0005856 | 8 | gene_08998.t1,gene_03046.t1,gene_00134.t1,gene_06364.t1,gene_07381.t1,gene_10520.t1,gene_02766.t1,gene_02352.t1 | | cytoskeleton | cellular_component |
| GO:0055087 | 1 | gene_06776.t1 | | Ski complex | cellular_component |
| GO:0005852 | 12 | gene_00144.t1,gene_01700.t1,gene_00555.t1,gene_01354.t1,gene_06800.t1,gene_02418.t1,gene_05226.t1,gene_05458.t1,gene_00493.t1,gene_05408.t1,gene_03188.t1,gene_00720.t1 | | eukaryotic translation initiation factor 3 complex | cellular_component |
| GO:0016282 | 13 | gene_00144.t1,gene_01700.t1,gene_00555.t1,gene_01354.t1,gene_06008.t1,gene_02418.t1,gene_05226.t1,gene_05697.t1,gene_00493.t1,gene_05408.t1,gene_03188.t1,gene_06800.t1,gene_00720.t1 | | eukaryotic 43S preinitiation complex | cellular_component |
| GO:0033255 | 1 | gene_07471.t1 | | SAS acetyltransferase complex | cellular_component |
| GO:1904423 | 1 | gene_05126.t1 | | dehydrodolichyl diphosphate synthase complex | cellular_component |
| GO:1990112 | 1 | gene_02227.t1 | | RQC complex | cellular_component |
| GO:0030479 | 6 | gene_05990.t1,gene_02382.t1,gene_00669.t1,gene_08684.t1,gene_00218.t1,gene_08752.t1 | | actin cortical patch | cellular_component |
| GO:0005938 | 6 | gene_04255.t1,gene_07936.t1,gene_08232.t1,gene_04533.t1,gene_01180.t1,gene_05165.t1 | | cell cortex | cellular_component |
| GO:0012507 | 3 | gene_07218.t1,gene_03939.t1,gene_01668.t1 | | ER to Golgi transport vesicle membrane | cellular_component |
| GO:0005935 | 1 | gene_07646.t1 | | cellular bud neck | cellular_component |
| GO:0005934 | 1 | gene_07129.t1 | | cellular bud tip | cellular_component |
| GO:0031011 | 9 | gene_00682.t1,gene_07303.t1,gene_04352.t1,gene_00643.t1,gene_03376.t1,gene_10008.t1,gene_08351.t1,gene_03937.t1,gene_00427.t1 | | Ino80 complex | cellular_component |
| GO:0030014 | 3 | gene_03834.t1,gene_04448.t1,gene_10141.t1 | | CCR4-NOT complex | cellular_component |

**Table S3 Detailed Gene Ontology (GO) classification of protein families in the genome of *P. paneum* OM1 (*Continued*)**

| **GO ID** | **Seq Num** | | **Seq List** | **GO term** | **Category** |
| --- | --- | --- | --- | --- | --- |
| GO:0030015 | 3 | gene_06697.t1,gene_07005.t1,gene_08626.t1 | | CCR4-NOT core complex | cellular_component |
| GO:0005737 | 316 | gene_01652.t1,gene_09324.t1,gene_06251.t1,gene_02375.t1,gene_09601.t1,gene_07933.t1,gene_10408.t1,gene_05645.t1,gene_08597.t1,gene_08161.t1,gene_09759.t1,gene_00005.t1,gene_09911.t1,gene_08589.t1,gene_07261.t1,gene_00718.t1,gene_06113.t1,gene_03284.t1,gene_02002.t1,gene_02156.t1,gene_00517.t1,gene_04559.t1,gene_07409.t1,gene_03977.t1,gene_05877.t1,gene_05731.t1,gene_01236.t1,gene_04192.t1,gene_08515.t1,gene_01562.t1,gene_01446.t1,gene_01524.t1,gene_04082.t1,gene_07305.t1,gene_06835.t1,gene_08036.t1,gene_10469.t1,gene_05155.t1,gene_10242.t1,gene_02054.t1,gene_03283.t1,gene_01340.t1,gene_01712.t1,gene_00353.t1,gene_00665.t1,gene_08097.t1,gene_07982.t1,gene_09602.t1,gene_01196.t1,gene_09250.t1,gene_06123.t1,gene_06154.t1,gene_07673.t1,gene_04190.t1,gene_01792.t1,gene_00551.t1,gene_04327.t1,gene_03453.t1,gene_07276.t1,gene_06913.t1,gene_07272.t1,gene_02666.t1,gene_07640.t1,gene_01364.t1,gene_04610.t1,gene_10424.t1,gene_03377.t1,gene_01433.t1,gene_06232.t1,gene_09833.t1,gene_05249.t1,gene_04062.t1,gene_05845.t1,gene_02997.t1,gene_09706.t1,gene_00647.t1,gene_06697.t1,gene_10009.t1,gene_01055.t1,gene_00817.t1,gene_01718.t1,gene_02251.t1,gene_09718.t1,gene_04109.t1,gene_07453.t1,gene_08710.t1,gene_04234.t1,gene_02965.t1,gene_07903.t1,gene_09256.t1,gene_02029.t1,gene_00371.t1,gene_05892.t1,gene_02486.t1,gene_08765.t1,gene_09289.t1,gene_06848.t1,gene_10097.t1,gene_02368.t1,gene_09486.t1,gene_05564.t1,gene_09596.t1,gene_05364.t1,gene_09282.t1,gene_00361.t1,gene_03856.t1,gene_02850.t1,gene_07825.t1,gene_05995.t1,gene_01071.t1,gene_01503.t1,gene_02854.t1,gene_02684.t1,gene_04608.t1,gene_07170.t1,gene_06979.t1,gene_02356.t1,gene_07336.t1,gene_09265.t1,gene_03080.t1,gene_10446.t1,gene_08024.t1,gene_02643.t1,gene_03313.t1,gene_08746.t1,gene_05907.t1,gene_00559.t1,gene_07215.t1,gene_05374.t1,gene_06759.t1,gene_10327.t1,gene_00527.t1,gene_07394.t1,gene_05140.t1,gene_07980.t1,gene_06203.t1,gene_03191.t1,gene_01073.t1,gene_01501.t1,gene_08998.t1,gene_04722.t1,gene_01557.t1,gene_06451.t1,gene_05840.t1,gene_01139.t1,gene_09578.t1,gene_06125.t1,gene_02254.t1,gene_08687.t1,gene_06132.t1,gene_00631.t1,gene_03487.t1,gene_05624.t1,gene_02395.t1,gene_10017.t1,gene_07067.t1,gene_04547.t1,gene_10343.t1,gene_03170.t1,gene_08037.t1,gene_01374.t1,gene_07355.t1,gene_01369.t1,gene_07892.t1,gene_03094.t1,gene_09083.t1,gene_00356.t1,gene_06698.t1,gene_07138.t1,gene_08869.t1,gene_00624.t1,gene_09048.t1,gene_10321.t1,gene_10420.t1,gene_04461.t1, | | cytoplasm | cellular_component |

**Table S3 Detailed Gene Ontology (GO) classification of protein families in the genome of *P. paneum* OM1 (*Continued*)**

| **GO ID** | **Seq Num** | | **Seq List** | **GO term** | **Category** |
| --- | --- | --- | --- | --- | --- |
| GO:0005737 | 316 | gene_03811.t1,gene_10529.t1,gene_02682.t1,gene_09266.t1,gene_10291.t1,gene_01094.t1,gene_04098.t1,gene_10518.t1,gene_03863.t1,gene_03474.t1,gene_05913.t1,gene_09635.t1,gene_04105.t1,gene_01989.t1,gene_06241.t1,gene_05689.t1,gene_03981.t1,gene_06009.t1,gene_01192.t1,gene_09182.t1,gene_04252.t1,gene_01636.t1,gene_03790.t1,gene_08577.t1,gene_00709.t1,gene_09824.t1,gene_07979.t1,gene_07313.t1,gene_02586.t1,gene_01630.t1,gene_03187.t1,gene_07619.t1,gene_00422.t1,gene_02830.t1,gene_04316.t1,gene_02386.t1,gene_07038.t1,gene_04233.t1,gene_00134.t1,gene_02554.t1,gene_09453.t1,gene_03638.t1,gene_05182.t1,gene_02725.t1,gene_04224.t1,gene_09703.t1,gene_05363.t1,gene_05876.t1,gene_08722.t1,gene_07732.t1,gene_02420.t1,gene_09259.t1,gene_03141.t1,gene_07302.t1,gene_02892.t1,gene_05138.t1,gene_03613.t1,gene_07670.t1,gene_09679.t1,gene_10202.t1,gene_07432.t1,gene_01719.t1,gene_05691.t1,gene_01300.t1,gene_09003.t1,gene_00326.t1,gene_00399.t1,gene_03414.t1,gene_03475.t1,gene_06330.t1,gene_07354.t1,gene_08626.t1,gene_10373.t1,gene_03822.t1,gene_09683.t1,gene_02352.t1,gene_03194.t1,gene_00408.t1,gene_04717.t1,gene_06664.t1,gene_07743.t1,gene_02565.t1,gene_03091.t1,gene_05700.t1,gene_07791.t1,gene_07953.t1,gene_04409.t1,gene_08329.t1,gene_08547.t1,gene_02959.t1,gene_05375.t1,gene_08394.t1,gene_10487.t1,gene_08575.t1,gene_00563.t1,gene_07851.t1,gene_06358.t1,gene_07873.t1,gene_01201.t1,gene_02790.t1,gene_05910.t1,gene_08813.t1,gene_05772.t1,gene_05869.t1,gene_03391.t1,gene_05774.t1,gene_07887.t1,gene_08235.t1,gene_06236.t1,gene_09098.t1,gene_08593.t1,gene_08916.t1,gene_06643.t1,gene_01592.t1,gene_07395.t1,gene_07590.t1,gene_07923.t1,gene_10216.t1,gene_02686.t1,gene_01550.t1,gene_04284.t1,gene_07037.t1,gene_10433.t1,gene_04096.t1,gene_08488.t1,gene_05839.t1,gene_04266.t1,gene_10602.t1,gene_02367.t1,gene_06990.t1,gene_04529.t1,gene_10354.t1,gene_01010.t1,gene_06637.t1,gene_02487.t1,gene_01234.t1,gene_05485.t1,gene_09244.t1,gene_00871.t1,gene_09540.t1,gene_09219.t1 | | cytoplasm | cellular_component |
| GO:0005732 | 2 | gene_02232.t1,gene_09290.t1 | | sno(s)RNA-containing ribonucleoprotein complex | cellular_component |

**Table S3 Detailed Gene Ontology (GO) classification of protein families in the genome of *P. paneum* OM1 (*Continued*)**

| **GO ID** | **Seq Num** | | **Seq List** | **GO term** | **Category** |
| --- | --- | --- | --- | --- | --- |
| GO:0005730 | 76 | gene_08509.t1,gene_10328.t1,gene_06349.t1,gene_04149.t1,gene_05788.t1,gene_00423.t1,gene_06495.t1,gene_00676.t1,gene_01431.t1,gene_08840.t1,gene_01554.t1,gene_07034.t1,gene_06113.t1,gene_03678.t1,gene_03181.t1,gene_02121.t1,gene_05674.t1,gene_00411.t1,gene_09818.t1,gene_05207.t1,gene_09850.t1,gene_05249.t1,gene_05954.t1,gene_05136.t1,gene_04356.t1,gene_09509.t1,gene_03927.t1,gene_01589.t1,gene_06516.t1,gene_01602.t1,gene_06638.t1,gene_07171.t1,gene_07393.t1,gene_07039.t1,gene_09775.t1,gene_09258.t1,gene_07100.t1,gene_05225.t1,gene_09001.t1,gene_03926.t1,gene_01093.t1,gene_06329.t1,gene_06245.t1,gene_07935.t1,gene_03203.t1,gene_05314.t1,gene_06989.t1,gene_06649.t1,gene_00707.t1,gene_09219.t1,gene_09512.t1,gene_02474.t1,gene_08271.t1,gene_10370.t1,gene_01030.t1,gene_01550.t1,gene_06557.t1,gene_02354.t1,gene_07329.t1,gene_07733.t1,gene_06571.t1,gene_06044.t1,gene_07075.t1,gene_09567.t1,gene_06350.t1,gene_03548.t1,gene_09858.t1,gene_07417.t1,gene_10571.t1,gene_09012.t1,gene_01509.t1,gene_07283.t1,gene_00725.t1,gene_04402.t1,gene_09823.t1,gene_05806.t1 | | nucleolus | cellular_component |
| GO:0005739 | 103 | gene_05959.t1,gene_03293.t1,gene_07146.t1,gene_07978.t1,gene_06805.t1,gene_01900.t1,gene_03583.t1,gene_06359.t1,gene_05570.t1,gene_08389.t1,gene_10305.t1,gene_06102.t1,gene_09113.t1,gene_06030.t1,gene_07608.t1,gene_01271.t1,gene_01319.t1,gene_00632.t1,gene_09750.t1,gene_06101.t1,gene_07642.t1,gene_00798.t1,gene_05698.t1,gene_01561.t1,gene_07283.t1,gene_09687.t1,gene_05707.t1,gene_01416.t1,gene_03222.t1,gene_00660.t1,gene_07567.t1,gene_02293.t1,gene_03540.t1,gene_08486.t1,gene_08359.t1,gene_06069.t1,gene_09742.t1,gene_02317.t1,gene_06832.t1,gene_09989.t1,gene_09197.t1,gene_02503.t1,gene_08317.t1,gene_06655.t1,gene_08587.t1,gene_00600.t1,gene_07631.t1,gene_06972.t1,gene_08109.t1,gene_10516.t1,gene_09462.t1,gene_03168.t1,gene_04330.t1,gene_05493.t1,gene_00813.t1,gene_09558.t1,gene_01219.t1,gene_03996.t1,gene_10375.t1,gene_06573.t1,gene_08508.t1,gene_09552.t1,gene_06121.t1,gene_03643.t1,gene_10320.t1,gene_08282.t1,gene_10312.t1,gene_02366.t1,gene_01545.t1,gene_04609.t1,gene_08720.t1,gene_07214.t1,gene_07534.t1,gene_10445.t1,gene_02794.t1,gene_08325.t1,gene_05230.t1,gene_02452.t1,gene_10358.t1,gene_02324.t1,gene_10319.t1,gene_00483.t1,gene_04246.t1,gene_08094.t1,gene_03285.t1,gene_01106.t1,gene_04329.t1,gene_02255.t1,gene_01541.t1,gene_02394.t1,gene_08051.t1,gene_05683.t1,gene_01020.t1,gene_00364.t1,gene_06115.t1,gene_06601.t1,gene_05771.t1,gene_10491.t1,gene_09301.t1,gene_09628.t1, | | mitochondrion | cellular_component |

**Table S3 Detailed Gene Ontology (GO) classification of protein families in the genome of *P. paneum* OM1 (*Continued*)**

| **GO ID** | **Seq Num** | | **Seq List** | **GO term** | **Category** |
| --- | --- | --- | --- | --- | --- |
| GO:0005739 | 103 | gene_07368.t1,gene_02428.t1,gene_08404.t1 | | mitochondrion | cellular_component |
| GO:0030659 | 3 | gene_01917.t1,gene_09248.t1,gene_10308.t1 | | cytoplasmic vesicle membrane | cellular_component |
| GO:0030122 | 1 | gene_01313.t1 | | AP-2 adaptor complex | cellular_component |
| GO:0030123 | 2 | gene_05895.t1,gene_07361.t1 | | AP-3 adaptor complex | cellular_component |
| GO:0030121 | 2 | gene_02540.t1,gene_07106.t1 | | AP-1 adaptor complex | cellular_component |
| GO:0030126 | 5 | gene_02033.t1,gene_06756.t1,gene_03142.t1,gene_01728.t1,gene_08919.t1 | | COPI vesicle coat | cellular_component |
| GO:0030127 | 4 | gene_03214.t1,gene_09312.t1,gene_10522.t1,gene_01017.t1 | | COPII vesicle coat | cellular_component |
| GO:0000775 | 5 | gene_07613.t1,gene_05154.t1,gene_09025.t1,gene_09619.t1,gene_08074.t1 | | chromosome, centromeric region | cellular_component |
| GO:0000776 | 9 | gene_05640.t1,gene_09546.t1,gene_06909.t1,gene_04179.t1,gene_00422.t1,gene_03245.t1,gene_10002.t1,gene_09780.t1,gene_01875.t1 | | kinetochore | cellular_component |
| GO:0000178 | 4 | gene_03164.t1,gene_07302.t1,gene_06123.t1,gene_10164.t1 | | exosome (RNase complex) | cellular_component |
| GO:0000176 | 6 | gene_03242.t1,gene_06239.t1,gene_02697.t1,gene_03959.t1,gene_00829.t1,gene_01055.t1 | | nuclear exosome (RNase complex) | cellular_component |
| GO:0090730 | 1 | gene_08535.t1 | | Las1 complex | cellular_component |
| GO:0045261 | 4 | gene_01026.t1,gene_00280.t1,gene_08419.t1,gene_01009.t1 | | proton-transporting ATP synthase complex, catalytic core F(1) | cellular_component |
| GO:0045263 | 2 | gene_03171.t1,gene_06355.t1 | | proton-transporting ATP synthase complex, coupling factor F(o) | cellular_component |
| GO:0000502 | 9 | gene_08397.t1,gene_10539.t1,gene_05624.t1,gene_06474.t1,gene_00356.t1,gene_02805.t1,gene_02473.t1,gene_07275.t1,gene_03734.t1 | | proteasome complex | cellular_component |
| GO:0000500 | 1 | gene_04314.t1 | | RNA polymerase I upstream activating factor complex | cellular_component |
| GO:0000506 | 2 | gene_06610.t1,gene_09007.t1 | | glycosylphosphatidylinositol-N-acetylglucosaminyltransferase (GPI-GnT) complex | cellular_component |
| GO:0033063 | 1 | gene_09111.t1 | | Rad51B-Rad51C-Rad51D-XRCC2 complex | cellular_component |
| GO:0005844 | 2 | gene_05249.t1,gene_07129.t1 | | polysome | cellular_component |
| GO:0005847 | 1 | gene_03216.t1 | | mRNA cleavage and polyadenylation specificity factor complex | cellular_component |
| GO:0005846 | 1 | gene_09711.t1 | | nuclear cap binding complex | cellular_component |

**Table S3 Detailed Gene Ontology (GO) classification of protein families in the genome of *P. paneum* OM1 (*Continued*)**

| **GO ID** | **Seq Num** | | **Seq List** | **GO term** | **Category** |
| --- | --- | --- | --- | --- | --- |
| GO:0005840 | 108 | gene_07146.t1,gene_01069.t1,gene_09911.t1,gene_10009.t1,gene_06359.t1,gene_01143.t1,gene_03172.t1,gene_04288.t1,gene_04612.t1,gene_10488.t1,gene_08577.t1,gene_00424.t1,gene_02603.t1,gene_05698.t1,gene_09731.t1,gene_04610.t1,gene_07237.t1,gene_03284.t1,gene_05235.t1,gene_01386.t1,gene_03883.t1,gene_05845.t1,gene_02997.t1,gene_06369.t1,gene_06113.t1,gene_05192.t1,gene_05623.t1,gene_07214.t1,gene_10173.t1,gene_01215.t1,gene_09486.t1,gene_02931.t1,gene_05390.t1,gene_01327.t1,gene_02684.t1,gene_03088.t1,gene_06815.t1,gene_08346.t1,gene_08587.t1,gene_02469.t1,gene_07654.t1,gene_00559.t1,gene_07950.t1,gene_02779.t1,gene_07326.t1,gene_06557.t1,gene_05138.t1,gene_06282.t1,gene_04091.t1,gene_06030.t1,gene_03168.t1,gene_08037.t1,gene_08736.t1,gene_01369.t1,gene_02457.t1,gene_00402.t1,gene_06842.t1,gene_08508.t1,gene_06319.t1,gene_06873.t1,gene_05838.t1,gene_01594.t1,gene_00401.t1,gene_08682.t1,gene_04240.t1,gene_07619.t1,gene_02637.t1,gene_01723.t1,gene_01417.t1,gene_01678.t1,gene_04441.t1,gene_10445.t1,gene_09259.t1,gene_07170.t1,gene_05876.t1,gene_08514.t1,gene_08881.t1,gene_10591.t1,gene_10017.t1,gene_00539.t1,gene_08028.t1,gene_06239.t1,gene_02556.t1,gene_01627.t1,gene_01599.t1,gene_10358.t1,gene_07872.t1,gene_06664.t1,gene_04409.t1,gene_08547.t1,gene_09596.t1,gene_09003.t1,gene_09302.t1,gene_10540.t1,gene_05686.t1,gene_09718.t1,gene_05885.t1,gene_00829.t1,gene_00481.t1,gene_00592.t1,gene_06861.t1,gene_02434.t1,gene_01550.t1,gene_06115.t1,gene_02697.t1,gene_03959.t1,gene_01010.t1,gene_02428.t1 | | ribosome | cellular_component |
| GO:0005849 | 3 | gene_05890.t1,gene_07762.t1,gene_04188.t1 | | mRNA cleavage factor complex | cellular_component |
| GO:0030864 | 1 | gene_08600.t1 | | cortical actin cytoskeleton | cellular_component |
| GO:0033263 | 1 | gene_06397.t1 | | CORVET complex | cellular_component |
| GO:0035145 | 2 | gene_08918.t1,gene_07305.t1 | | exon-exon junction complex | cellular_component |
| GO:0033116 | 1 | gene_07218.t1 | | endoplasmic reticulum-Golgi intermediate compartment membrane | cellular_component |
| GO:0071004 | 1 | gene_10367.t1 | | U2-type prespliceosome | cellular_component |
| GO:0005905 | 1 | gene_04556.t1 | | clathrin-coated pit | cellular_component |
| GO:0061695 | 1 | gene_09009.t1 | | transferase complex, transferring phosphorus-containing groups | cellular_component |
| GO:1904949 | 3 | gene_09699.t1,gene_07744.t1,gene_07212.t1 | | ATPase complex | cellular_component |
| GO:0030008 | 3 | gene_09223.t1,gene_08532.t1,gene_00033.t1 | | TRAPP complex | cellular_component |

**Table S3 Detailed Gene Ontology (GO) classification of protein families in the genome of *P. paneum* OM1 (*Continued*)**

| **GO ID** | **Seq Num** | | **Seq List** | **GO term** | **Category** |
| --- | --- | --- | --- | --- | --- |
| GO:0000347 | 1 | gene_08105.t1 | | THO complex | cellular_component |
| GO:0030131 | 2 | gene_04556.t1,gene_10348.t1 | | clathrin adaptor complex | cellular_component |
| GO:0030130 | 2 | gene_01372.t1,gene_04061.t1 | | clathrin coat of trans-Golgi network vesicle | cellular_component |
| GO:0030133 | 1 | gene_06544.t1 | | transport vesicle | cellular_component |
| GO:0030136 | 1 | gene_02601.t1 | | clathrin-coated vesicle | cellular_component |
| GO:0005694 | 13 | gene_09220.t1,gene_04254.t1,gene_07003.t1,gene_07246.t1,gene_05627.t1,gene_04413.t1,gene_02360.t1,gene_01025.t1,gene_03476.t1,gene_07311.t1,gene_10167.t1,gene_06720.t1,gene_07260.t1 | | chromosome | cellular_component |
| GO:0000813 | 2 | gene_05346.t1,gene_06652.t1 | | ESCRT I complex | cellular_component |
| GO:0009349 | 1 | gene_02362.t1 | | riboflavin synthase complex | cellular_component |
| GO:0008180 | 6 | gene_08097.t1,gene_07432.t1,gene_06270.t1,gene_00249.t1,gene_06848.t1,gene_01217.t1 | | COP9 signalosome | cellular_component |
| GO:0031510 | 1 | gene_06429.t1 | | SUMO activating enzyme complex | cellular_component |
| GO:1990862 | 1 | gene_05891.t1 | | nuclear membrane complex Bqt3-Bqt4 | cellular_component |
| GO:0045254 | 1 | gene_09157.t1 | | pyruvate dehydrogenase complex | cellular_component |
| GO:0045252 | 1 | gene_07350.t1 | | oxoglutarate dehydrogenase complex | cellular_component |
| GO:0070985 | 1 | gene_07367.t1 | | transcription factor TFIIK complex | cellular_component |
| GO:0030897 | 1 | gene_06397.t1 | | HOPS complex | cellular_component |
| GO:0016602 | 1 | gene_02408.t1 | | CCAAT-binding factor complex | cellular_component |
| GO:0005871 | 4 | gene_05053.t1,gene_04962.t1,gene_00076.t1,gene_04964.t1 | | kinesin complex | cellular_component |
| GO:0005874 | 33 | gene_01652.t1,gene_08710.t1,gene_03094.t1,gene_08597.t1,gene_08722.t1,gene_05053.t1,gene_00668.t1,gene_05877.t1,gene_03452.t1,gene_10487.t1,gene_05155.t1,gene_06154.t1,gene_10636.t1,gene_05738.t1,gene_08235.t1,gene_10207.t1,gene_04180.t1,gene_00015.t1,gene_08161.t1,gene_07395.t1,gene_08869.t1,gene_03563.t1,gene_06203.t1,gene_01073.t1,gene_07366.t1,gene_03377.t1,gene_08913.t1,gene_05840.t1,gene_01139.t1,gene_07037.t1,gene_04962.t1,gene_05691.t1,gene_10291.t1 | | microtubule | cellular_component |
| GO:0005876 | 2 | gene_07276.t1,gene_03170.t1 | | spindle microtubule | cellular_component |
| GO:0043564 | 2 | gene_04537.t1,gene_02991.t1 | | Ku70:Ku80 complex | cellular_component |
| GO:0044614 | 1 | gene_07129.t1 | | nuclear pore cytoplasmic filaments | cellular_component |
| GO:0071011 | 1 | gene_07996.t1 | | precatalytic spliceosome | cellular_component |

**Table S3 Detailed Gene Ontology (GO) classification of protein families in the genome of *P. paneum* OM1 (*Continued*)**

| **GO ID** | **Seq Num** | | **Seq List** | **GO term** | **Category** |
| --- | --- | --- | --- | --- | --- |
| GO:0005675 | 3 | gene_09119.t1,gene_04147.t1,gene_01504.t1 | | transcription factor TFIIH holo complex | cellular_component |
| GO:0033290 | 13 | gene_00144.t1,gene_01700.t1,gene_00555.t1,gene_01354.t1,gene_06008.t1,gene_02418.t1,gene_05226.t1,gene_05697.t1,gene_00493.t1,gene_05408.t1,gene_03188.t1,gene_06800.t1,gene_00720.t1 | | eukaryotic 48S preinitiation complex | cellular_component |
| GO:0019867 | 2 | gene_01240.t1,gene_02864.t1 | | outer membrane | cellular_component |
| GO:1902494 | 1 | gene_00876.t1 | | catalytic complex | cellular_component |
| GO:0031080 | 2 | gene_08367.t1,gene_08906.t1 | | nuclear pore outer ring | cellular_component |
| GO:0042597 | 1 | gene_07638.t1 | | periplasmic space | cellular_component |
| GO:0043189 | 1 | gene_08721.t1 | | H4/H2A histone acetyltransferase complex | cellular_component |
| GO:1990316 | 1 | gene_03673.t1 | | Atg1/ULK1 kinase complex | cellular_component |
| GO:0005688 | 2 | gene_08685.t1,gene_06070.t1 | | U6 snRNP | cellular_component |
| GO:0005685 | 2 | gene_03867.t1,gene_10367.t1 | | U1 snRNP | cellular_component |
| GO:0005684 | 1 | gene_01308.t1 | | U2-type spliceosomal complex | cellular_component |
| GO:0005682 | 2 | gene_00681.t1,gene_02996.t1 | | U5 snRNP | cellular_component |
| GO:0005681 | 29 | gene_08576.t1,gene_03530.t1,gene_07820.t1,gene_02357.t1,gene_08079.t1,gene_07256.t1,gene_04011.t1,gene_04086.t1,gene_07641.t1,gene_00549.t1,gene_06051.t1,gene_09750.t1,gene_01054.t1,gene_00409.t1,gene_09859.t1,gene_08685.t1,gene_06070.t1,gene_10208.t1,gene_03076.t1,gene_02780.t1,gene_06855.t1,gene_07946.t1,gene_04534.t1,gene_06603.t1,gene_07483.t1,gene_06158.t1,gene_02203.t1,gene_05450.t1,gene_03349.t1 | | spliceosomal complex | cellular_component |
| GO:0042765 | 5 | gene_03868.t1,gene_01979.t1,gene_01432.t1,gene_10537.t1,gene_02656.t1 | | GPI-anchor transamidase complex | cellular_component |
| GO:0031298 | 1 | gene_07352.t1 | | replication fork protection complex | cellular_component |
| GO:0071006 | 1 | gene_07836.t1 | | U2-type catalytic step 1 spliceosome | cellular_component |
| GO:0000792 | 1 | gene_03800.t1 | | heterochromatin | cellular_component |
| GO:0000793 | 1 | gene_05154.t1 | | condensed chromosome | cellular_component |
| GO:0000159 | 2 | gene_07846.t1,gene_00255.t1 | | protein phosphatase type 2A complex | cellular_component |
| GO:0000151 | 1 | gene_00376.t1 | | ubiquitin ligase complex | cellular_component |
| GO:0048188 | 6 | gene_05779.t1,gene_03112.t1,gene_04242.t1,gene_02360.t1,gene_02111.t1,gene_02323.t1 | | Set1C/COMPASS complex | cellular_component |
| GO:0000938 | 3 | gene_07863.t1,gene_08974.t1,gene_06774.t1 | | GARP complex | cellular_component |

**Table S3 Detailed Gene Ontology (GO) classification of protein families in the genome of *P. paneum* OM1 (*Continued*)**

| **GO ID** | **Seq Num** | | **Seq List** | **GO term** | **Category** |
| --- | --- | --- | --- | --- | --- |
| GO:0005869 | 4 | gene_03089.t1,gene_10469.t1,gene_08241.t1,gene_10420.t1 | | dynactin complex | cellular_component |
| GO:0033620 | 1 | gene_05249.t1 | | Mei2 nuclear dot complex | cellular_component |
| GO:1990251 | 1 | gene_05249.t1 | | nuclear exosome focus | cellular_component |
| GO:0005786 | 5 | gene_01542.t1,gene_06620.t1,gene_04006.t1,gene_04397.t1,gene_07051.t1 | | signal recognition particle, endoplasmic reticulum targeting | cellular_component |
| GO:0005787 | 3 | gene_09230.t1,gene_00277.t1,gene_07920.t1 | | signal peptidase complex | cellular_component |
| GO:0005785 | 1 | gene_09488.t1 | | signal recognition particle receptor complex | cellular_component |
| GO:0005782 | 2 | gene_05844.t1,gene_04206.t1 | | peroxisomal matrix | cellular_component |
| GO:0005783 | 23 | gene_05695.t1,gene_02046.t1,gene_08604.t1,gene_07756.t1,gene_00033.t1,gene_09223.t1,gene_09312.t1,gene_10329.t1,gene_06474.t1,gene_10359.t1,gene_02041.t1,gene_05802.t1,gene_06068.t1,gene_09945.t1,gene_03652.t1,gene_02521.t1,gene_05790.t1,gene_08680.t1,gene_05223.t1,gene_10423.t1,gene_03121.t1,gene_05126.t1,gene_08532.t1 | | endoplasmic reticulum | cellular_component |
| GO:0005780 | 1 | gene_06702.t1 | | extrinsic component of intraperoxisomal membrane | cellular_component |
| GO:0005788 | 3 | gene_03162.t1,gene_08283.t1,gene_10419.t1 | | endoplasmic reticulum lumen | cellular_component |
| GO:0005789 | 101 | gene_06489.t1,gene_06128.t1,gene_00461.t1,gene_10522.t1,gene_04317.t1,gene_09511.t1,gene_01668.t1,gene_00974.t1,gene_09050.t1,gene_05746.t1,gene_08803.t1,gene_04035.t1,gene_06564.t1,gene_10092.t1,gene_07257.t1,gene_05187.t1,gene_04156.t1,gene_00428.t1,gene_00203.t1,gene_03214.t1,gene_02094.t1,gene_02828.t1,gene_02505.t1,gene_07365.t1,gene_02439.t1,gene_01263.t1,gene_01577.t1,gene_04541.t1,gene_02539.t1,gene_06238.t1,gene_05987.t1,gene_00016.t1,gene_01017.t1,gene_09200.t1,gene_07238.t1,gene_02784.t1,gene_10605.t1,gene_01909.t1,gene_08545.t1,gene_07380.t1,gene_09248.t1,gene_06952.t1,gene_10456.t1,gene_09487.t1,gene_07000.t1,gene_01120.t1,gene_04553.t1,gene_09252.t1,gene_00418.t1,gene_02233.t1,gene_09620.t1,gene_03939.t1,gene_09559.t1,gene_04068.t1,gene_02462.t1,gene_03380.t1,gene_09123.t1,gene_08298.t1,gene_10419.t1,gene_01247.t1,gene_09196.t1,gene_03504.t1,gene_00328.t1,gene_09348.t1,gene_08010.t1,gene_07044.t1,gene_10308.t1,gene_06325.t1,gene_07218.t1,gene_01084.t1,gene_06565.t1,gene_03177.t1,gene_07018.t1,gene_02093.t1,gene_02076.t1,gene_08297.t1,gene_01208.t1,gene_09213.t1,gene_03043.t1,gene_07528.t1,gene_04734.t1,gene_06254.t1,gene_09564.t1,gene_06869.t1,gene_02943.t1,gene_10378.t1,gene_02693.t1,gene_03296.t1,gene_09902.t1,gene_01116.t1,gene_00553.t1,gene_08170.t1,gene_06533.t1,gene_06043.t1,gene_04168.t1,gene_08627.t1,gene_06509.t1,gene_00966.t1,gene_08086.t1,gene_05817.t1, | | endoplasmic reticulum membrane | cellular_component |

**Table S3 Detailed Gene Ontology (GO) classification of protein families in the genome of *P. paneum* OM1 (*Continued*)**

| **GO ID** | **Seq Num** | | **Seq List** | **GO term** | **Category** |
| --- | --- | --- | --- | --- | --- |
| GO:0005789 | 101 | gene_07362.t1 | | endoplasmic reticulum membrane | cellular_component |
| GO:0030117 | 3 | gene_06752.t1,gene_00582.t1,gene_00554.t1 | | membrane coat | cellular_component |
| GO:1990879 | 1 | gene_02492.t1 | | CST complex | cellular_component |
| GO:0005672 | 1 | gene_02099.t1 | | transcription factor TFIIA complex | cellular_component |
| GO:0005673 | 1 | gene_10467.t1 | | transcription factor TFIIE complex | cellular_component |
| GO:0005674 | 1 | gene_00246.t1 | | transcription factor TFIIF complex | cellular_component |
| GO:0000781 | 16 | gene_02991.t1,gene_02882.t1,gene_04537.t1,gene_09034.t1,gene_06252.t1,gene_05244.t1,gene_04388.t1,gene_08521.t1,gene_06106.t1,gene_04642.t1,gene_07898.t1,gene_02155.t1,gene_10369.t1,gene_00801.t1,gene_03799.t1,gene_08500.t1 | | chromosome, telomeric region | cellular_component |
| GO:0000785 | 3 | gene_05249.t1,gene_05457.t1,gene_02910.t1 | | chromatin | cellular_component |
| GO:0000786 | 8 | gene_07352.t1,gene_07353.t1,gene_07755.t1,gene_09619.t1,gene_02242.t1,gene_07282.t1,gene_02241.t1,gene_03509.t1 | | nucleosome | cellular_component |
| GO:0000145 | 8 | gene_05127.t1,gene_08719.t1,gene_07646.t1,gene_09722.t1,gene_03986.t1,gene_06544.t1,gene_01590.t1,gene_04572.t1 | | exocyst | cellular_component |
| GO:0000148 | 1 | gene_10302.t1 | | 1,3-beta-D-glucan synthase complex | cellular_component |
| GO:0045239 | 1 | gene_00860.t1 | | tricarboxylic acid cycle enzyme complex | cellular_component |
| GO:0008540 | 9 | gene_02486.t1,gene_05847.t1,gene_01236.t1,gene_07138.t1,gene_02420.t1,gene_04461.t1,gene_00032.t1,gene_05700.t1,gene_01479.t1 | | proteasome regulatory particle, base subcomplex | cellular_component |
| GO:0030870 | 3 | gene_06548.t1,gene_04738.t1,gene_10444.t1 | | Mre11 complex | cellular_component |
| GO:0033588 | 5 | gene_09706.t1,gene_00353.t1,gene_09540.t1,gene_06853.t1,gene_05907.t1 | | elongator holoenzyme complex | cellular_component |
| GO:0000421 | 1 | gene_04192.t1 | | autophagosome membrane | cellular_component |
| GO:0015629 | 3 | gene_08417.t1,gene_03932.t1,gene_00367.t1 | | actin cytoskeleton | cellular_component |
| GO:0005891 | 1 | gene_05625.t1 | | voltage-gated calcium channel complex | cellular_component |
| GO:0030904 | 1 | gene_08108.t1 | | retromer complex | cellular_component |
| GO:0030906 | 1 | gene_08590.t1 | | retromer, cargo-selective complex | cellular_component |
| GO:0030907 | 1 | gene_09058.t1 | | MBF transcription complex | cellular_component |
| GO:0034045 | 7 | gene_10456.t1,gene_10308.t1,gene_05641.t1,gene_02759.t1,gene_02838.t1,gene_03179.t1,gene_03894.t1 | | phagophore assembly site membrane | cellular_component |
| GO:0034044 | 1 | gene_03048.t1 | | exomer complex | cellular_component |
| GO:0035267 | 5 | gene_00682.t1,gene_07183.t1,gene_10008.t1,gene_00415.t1,gene_00391.t1 | | NuA4 histone acetyltransferase complex | cellular_component |

**Table S3 Detailed Gene Ontology (GO) classification of protein families in the genome of *P. paneum* OM1 (*Continued*)**

| **GO ID** | **Seq Num** | | **Seq List** | **GO term** | **Category** |
| --- | --- | --- | --- | --- | --- |
| GO:0031981 | 4 | gene_03378.t1,gene_10468.t1,gene_07001.t1,gene_08530.t1 | | nuclear lumen | cellular_component |
| GO:0072546 | 3 | gene_07975.t1,gene_07360.t1,gene_01675.t1 | | EMC complex | cellular_component |
| GO:0000796 | 2 | gene_05995.t1,gene_07793.t1 | | condensin complex | cellular_component |
| GO:0005795 | 1 | gene_09062.t1 | | Golgi stack | cellular_component |
| GO:0005794 | 20 | gene_03601.t1,gene_07871.t1,gene_02859.t1,gene_01552.t1,gene_08258.t1,gene_09487.t1,gene_08532.t1,gene_05829.t1,gene_05545.t1,gene_09156.t1,gene_09641.t1,gene_05131.t1,gene_07361.t1,gene_10095.t1,gene_00033.t1,gene_09223.t1,gene_10183.t1,gene_02853.t1,gene_03291.t1,gene_01549.t1 | | Golgi apparatus | cellular_component |
| GO:0031965 | 5 | gene_00974.t1,gene_02439.t1,gene_08367.t1,gene_03348.t1,gene_08906.t1 | | nuclear membrane | cellular_component |
| GO:0031966 | 5 | gene_06626.t1,gene_03943.t1,gene_01447.t1,gene_02044.t1,gene_05187.t1 | | mitochondrial membrane | cellular_component |
| GO:0030132 | 2 | gene_01372.t1,gene_04061.t1 | | clathrin coat of coated pit | cellular_component |
| GO:0005663 | 1 | gene_07620.t1 | | DNA replication factor C complex | cellular_component |
| GO:0005665 | 3 | gene_01696.t1,gene_01093.t1,gene_05990.t1 | | RNA polymerase II, core complex | cellular_component |
| GO:0005664 | 2 | gene_08269.t1,gene_06427.t1 | | nuclear origin of replication recognition complex | cellular_component |
| GO:0005666 | 5 | gene_09013.t1,gene_06259.t1,gene_04655.t1,gene_08095.t1,gene_04203.t1 | | RNA polymerase III complex | cellular_component |
| GO:0005669 | 7 | gene_06623.t1,gene_00093.t1,gene_08167.t1,gene_00098.t1,gene_08169.t1,gene_07484.t1,gene_09109.t1 | | transcription factor TFIID complex | cellular_component |
| GO:0000795 | 1 | gene_06455.t1 | | synaptonemal complex | cellular_component |
| GO:0000220 | 1 | gene_10123.t1 | | vacuolar proton-transporting V-type ATPase, V0 domain | cellular_component |
| GO:0048471 | 1 | gene_00974.t1 | | perinuclear region of cytoplasm | cellular_component |
| GO:0048476 | 1 | gene_05747.t1 | | Holliday junction resolvase complex | cellular_component |
| GO:0016442 | 1 | gene_07978.t1 | | RISC complex | cellular_component |
| GO:0001401 | 1 | gene_02706.t1 | | SAM complex | cellular_component |
| GO:0001405 | 1 | gene_00730.t1 | | PAM complex, Tim23 associated import motor | cellular_component |
| GO:0000139 | 35 | gene_01969.t1,gene_01917.t1,gene_04805.t1,gene_10406.t1,gene_10290.t1,gene_03375.t1,gene_00571.t1,gene_03214.t1,gene_08919.t1,gene_00582.t1,gene_02541.t1,gene_10522.t1,gene_06756.t1,gene_05229.t1,gene_01728.t1,gene_02252.t1,gene_05113.t1,gene_01668.t1,gene_09248.t1,gene_06865.t1,gene_10658.t1,gene_08128.t1,gene_03142.t1,gene_05520.t1,gene_02033.t1,gene_09062.t1,gene_10475.t1,gene_05343.t1,gene_09159.t1,gene_01017.t1,gene_04999.t1,gene_10403.t1,gene_08775.t1,gene_10308.t1,gene_08583.t1 | | Golgi membrane | cellular_component |

**Table S3 Detailed Gene Ontology (GO) classification of protein families in the genome of *P. paneum* OM1 (*Continued*)**

| **GO ID** | **Seq Num** | | **Seq List** | **GO term** | **Category** |
| --- | --- | --- | --- | --- | --- |
| GO:0046930 | 2 | gene_00322.t1,gene_09709.t1 | | pore complex | cellular_component |
| GO:0031410 | 6 | gene_08775.t1,gene_08680.t1,gene_04192.t1,gene_02046.t1,gene_03121.t1,gene_09945.t1 | | cytoplasmic vesicle | cellular_component |
| GO:0031415 | 1 | gene_05336.t1 | | NatA complex | cellular_component |
| GO:0031417 | 2 | gene_02587.t1,gene_01755.t1 | | NatC complex | cellular_component |
| GO:0070772 | 1 | gene_10495.t1 | | PAS complex | cellular_component |
| GO:0031931 | 3 | gene_04143.t1,gene_03147.t1,gene_05323.t1 | | TORC1 complex | cellular_component |
| GO:0032040 | 9 | gene_02354.t1,gene_09012.t1,gene_08271.t1,gene_03203.t1,gene_02353.t1,gene_02121.t1,gene_01602.t1,gene_00411.t1,gene_06996.t1 | | small-subunit processome | cellular_component |
| GO:0000439 | 5 | gene_09119.t1,gene_01306.t1,gene_05871.t1,gene_04147.t1,gene_10227.t1 | | transcription factor TFIIH core complex | cellular_component |
| GO:0032865 | 4 | gene_04067.t1,gene_02094.t1,gene_09579.t1,gene_06112.t1 | | ERMES complex | cellular_component |
| GO:0030286 | 3 | gene_01652.t1,gene_03563.t1,gene_05840.t1 | | dynein complex | cellular_component |
| GO:0071821 | 1 | gene_06486.t1 | | FANCM-MHF complex | cellular_component |
| GO:0005576 | 57 | gene_08100.t1,gene_00945.t1,gene_03388.t1,gene_02259.t1,gene_08104.t1,gene_10598.t1,gene_01852.t1,gene_04755.t1,gene_01766.t1,gene_10045.t1,gene_02551.t1,gene_09366.t1,gene_02422.t1,gene_03424.t1,gene_01725.t1,gene_02291.t1,gene_06586.t1,gene_03160.t1,gene_00132.t1,gene_02150.t1,gene_09474.t1,gene_03906.t1,gene_01041.t1,gene_07566.t1,gene_01844.t1,gene_00439.t1,gene_05825.t1,gene_06941.t1,gene_03404.t1,gene_04530.t1,gene_00719.t1,gene_00145.t1,gene_06587.t1,gene_08114.t1,gene_08437.t1,gene_06882.t1,gene_01845.t1,gene_03622.t1,gene_00787.t1,gene_04429.t1,gene_10546.t1,gene_05091.t1,gene_02705.t1,gene_07429.t1,gene_07325.t1,gene_05722.t1,gene_03161.t1,gene_05702.t1,gene_10451.t1,gene_01388.t1,gene_08882.t1,gene_09475.t1,gene_01036.t1,gene_00384.t1,gene_03332.t1,gene_00523.t1,gene_08899.t1 | | extracellular region | cellular_component |
| GO:0034457 | 1 | gene_09290.t1 | | Mpp10 complex | cellular_component |
| GO:0005885 | 5 | gene_06990.t1,gene_05874.t1,gene_07743.t1,gene_02382.t1,gene_03091.t1 | | Arp2/3 protein complex | cellular_component |

**Table S3 Detailed Gene Ontology (GO) classification of protein families in the genome of *P. paneum* OM1 (*Continued*)**

| **GO ID** | **Seq Num** | | **Seq List** | **GO term** | **Category** |
| --- | --- | --- | --- | --- | --- |
| GO:0005886 | 157 | gene_02770.t1,gene_04199.t1,gene_00930.t1,gene_01794.t1,gene_06275.t1,gene_00100.t1,gene_08915.t1,gene_05561.t1,gene_07874.t1,gene_06057.t1,gene_06507.t1,gene_08829.t1,gene_01032.t1,gene_00393.t1,gene_09785.t1,gene_07381.t1,gene_01906.t1,gene_00665.t1,gene_08725.t1,gene_05084.t1,gene_00025.t1,gene_09807.t1,gene_02760.t1,gene_00577.t1,gene_09573.t1,gene_00179.t1,gene_06693.t1,gene_08982.t1,gene_03108.t1,gene_05719.t1,gene_08449.t1,gene_03571.t1,gene_09176.t1,gene_06546.t1,gene_09951.t1,gene_06645.t1,gene_08993.t1,gene_09142.t1,gene_03354.t1,gene_06925.t1,gene_10068.t1,gene_09507.t1,gene_04167.t1,gene_05990.t1,gene_08927.t1,gene_00622.t1,gene_05338.t1,gene_00743.t1,gene_07318.t1,gene_02051.t1,gene_00068.t1,gene_09106.t1,gene_06386.t1,gene_07562.t1,gene_06504.t1,gene_00926.t1,gene_03023.t1,gene_03306.t1,gene_09539.t1,gene_07809.t1,gene_08848.t1,gene_03411.t1,gene_03444.t1,gene_09430.t1,gene_02173.t1,gene_03407.t1,gene_01781.t1,gene_04469.t1,gene_05432.t1,gene_09310.t1,gene_01721.t1,gene_07559.t1,gene_09468.t1,gene_08773.t1,gene_03841.t1,gene_06574.t1,gene_09833.t1,gene_10401.t1,gene_01611.t1,gene_09187.t1,gene_10650.t1,gene_06264.t1,gene_00065.t1,gene_02409.t1,gene_09948.t1,gene_03776.t1,gene_05583.t1,gene_09940.t1,gene_03570.t1,gene_07449.t1,gene_10193.t1,gene_00810.t1,gene_10249.t1,gene_06398.t1,gene_00197.t1,gene_05216.t1,gene_00224.t1,gene_10623.t1,gene_03580.t1,gene_06570.t1,gene_03166.t1,gene_00293.t1,gene_00034.t1,gene_08242.t1,gene_02441.t1,gene_09975.t1,gene_07372.t1,gene_03028.t1,gene_06942.t1,gene_06851.t1,gene_01795.t1,gene_09019.t1,gene_06437.t1,gene_06385.t1,gene_08302.t1,gene_10671.t1,gene_09398.t1,gene_04521.t1,gene_09901.t1,gene_08752.t1,gene_01833.t1,gene_04304.t1,gene_03133.t1,gene_09943.t1,gene_09085.t1,gene_09872.t1,gene_08671.t1,gene_05401.t1,gene_06748.t1,gene_09274.t1,gene_07652.t1,gene_10250.t1,gene_09063.t1,gene_07436.t1,gene_01290.t1,gene_08876.t1,gene_08179.t1,gene_02621.t1,gene_03591.t1,gene_07068.t1,gene_08259.t1,gene_00669.t1,gene_00003.t1,gene_00673.t1,gene_06968.t1,gene_04756.t1,gene_06375.t1,gene_06726.t1,gene_05111.t1,gene_01175.t1,gene_10147.t1,gene_02584.t1,gene_01144.t1,gene_02782.t1,gene_04431.t1,gene_09716.t1,gene_06489.t1 | | plasma membrane | cellular_component |
| GO:0016586 | 2 | gene_09736.t1,gene_07314.t1 | | RSC-type complex | cellular_component |
| GO:0032991 | 3 | gene_04321.t1,gene_07735.t1,gene_00548.t1 | | protein-containing complex | cellular_component |
| GO:0016035 | 1 | gene_06856.t1 | | zeta DNA polymerase complex | cellular_component |

**Table S3 Detailed Gene Ontology (GO) classification of protein families in the genome of *P. paneum* OM1 (*Continued*)**

| **GO ID** | **Seq Num** | | **Seq List** | **GO term** | **Category** |
| --- | --- | --- | --- | --- | --- |
| GO:0030915 | 5 | gene_08214.t1,gene_00882.t1,gene_07343.t1,gene_03784.t1,gene_02270.t1 | | Smc5-Smc6 complex | cellular_component |
| GO:0016459 | 5 | gene_03570.t1,gene_08209.t1,gene_00218.t1,gene_03571.t1,gene_09267.t1 | | myosin complex | cellular_component |
| GO:0044284 | 1 | gene_05236.t1 | | mitochondrial crista junction | cellular_component |
| GO:0043332 | 1 | gene_10068.t1 | | mating projection tip | cellular_component |
| GO:0030688 | 2 | gene_08921.t1,gene_00707.t1 | | preribosome, small subunit precursor | cellular_component |
| GO:0030687 | 4 | gene_01431.t1,gene_00423.t1,gene_05207.t1,gene_05806.t1 | | preribosome, large subunit precursor | cellular_component |
| GO:0030686 | 1 | gene_00707.t1 | | 90S preribosome | cellular_component |
| GO:0030176 | 9 | gene_00979.t1,gene_09674.t1,gene_09583.t1,gene_09726.t1,gene_07236.t1,gene_09530.t1,gene_03397.t1,gene_07570.t1,gene_09579.t1 | | integral component of endoplasmic reticulum membrane | cellular_component |
| GO:0030173 | 4 | gene_03764.t1,gene_07961.t1,gene_04136.t1,gene_02181.t1 | | integral component of Golgi membrane | cellular_component |
| GO:0005655 | 4 | gene_00840.t1,gene_01748.t1,gene_03157.t1,gene_08067.t1 | | nucleolar ribonuclease P complex | cellular_component |
| GO:0005656 | 6 | gene_00515.t1,gene_01710.t1,gene_01540.t1,gene_07862.t1,gene_08245.t1,gene_09071.t1 | | nuclear pre-replicative complex | cellular_component |
| GO:0005657 | 1 | gene_09111.t1 | | replication fork | cellular_component |
| GO:0031314 | 5 | gene_04044.t1,gene_07253.t1,gene_07066.t1,gene_03847.t1,gene_10412.t1 | | extrinsic component of mitochondrial inner membrane | cellular_component |
| GO:0031083 | 2 | gene_03575.t1,gene_00877.t1 | | BLOC-1 complex | cellular_component |
| GO:0031515 | 3 | gene_07742.t1,gene_10437.t1,gene_04420.t1 | | tRNA (m1A) methyltransferase complex | cellular_component |
| GO:0031511 | 1 | gene_08738.t1 | | Mis6-Sim4 complex | cellular_component |
| GO:0010494 | 1 | gene_07129.t1 | | cytoplasmic stress granule | cellular_component |
| GO:0031227 | 1 | gene_02482.t1 | | intrinsic component of endoplasmic reticulum membrane | cellular_component |
| GO:0031225 | 26 | gene_08927.t1,gene_02770.t1,gene_02409.t1,gene_06645.t1,gene_00100.t1,gene_01032.t1,gene_03591.t1,gene_08982.t1,gene_03444.t1,gene_05084.t1,gene_07809.t1,gene_09807.t1,gene_06968.t1,gene_10623.t1,gene_06546.t1,gene_09951.t1,gene_06726.t1,gene_06437.t1,gene_01721.t1,gene_07652.t1,gene_09468.t1,gene_07562.t1,gene_08993.t1,gene_10671.t1,gene_04431.t1,gene_09716.t1 | | anchored component of membrane | cellular_component |
| GO:0000124 | 5 | gene_08771.t1,gene_01863.t1,gene_09830.t1,gene_05658.t1,gene_08169.t1 | | SAGA complex | cellular_component |
| GO:0000127 | 3 | gene_10633.t1,gene_06291.t1,gene_07840.t1 | | transcription factor TFIIIC complex | cellular_component |
| GO:0000126 | 1 | gene_03056.t1 | | transcription factor TFIIIB complex | cellular_component |
| GO:0000123 | 1 | gene_07837.t1 | | histone acetyltransferase complex | cellular_component |

**Table S3 Detailed Gene Ontology (GO) classification of protein families in the genome of *P. paneum* OM1 (*Continued*)**

| **GO ID** | **Seq Num** | | **Seq List** | **GO term** | **Category** |
| --- | --- | --- | --- | --- | --- |
| GO:0031428 | 2 | gene_03203.t1,gene_09012.t1 | | box C/D RNP complex | cellular_component |
| GO:0031422 | 1 | gene_06775.t1 | | RecQ family helicase-topoisomerase III complex | cellular_component |
| GO:0000221 | 1 | gene_05546.t1 | | vacuolar proton-transporting V-type ATPase, V1 domain | cellular_component |
| GO:0000444 | 1 | gene_09061.t1 | | MIS12/MIND type complex | cellular_component |
| GO:0000445 | 1 | gene_01138.t1 | | THO complex part of transcription export complex | cellular_component |
| GO:0071541 | 1 | gene_06008.t1 | | eukaryotic translation initiation factor 3 complex, eIF3m | cellular_component |
| GO:0071540 | 1 | gene_05697.t1 | | eukaryotic translation initiation factor 3 complex, eIF3e | cellular_component |
| GO:0000932 | 3 | gene_01674.t1,gene_09407.t1,gene_06101.t1 | | P-body | cellular_component |
| GO:0000931 | 1 | gene_05213.t1 | | gamma-tubulin large complex | cellular_component |
| GO:0016593 | 3 | gene_05205.t1,gene_07013.t1,gene_00642.t1 | | Cdc73/Paf1 complex | cellular_component |
| GO:0016592 | 23 | gene_09638.t1,gene_02427.t1,gene_05522.t1,gene_09075.t1,gene_03195.t1,gene_10396.t1,gene_08286.t1,gene_10618.t1,gene_06207.t1,gene_07235.t1,gene_09400.t1,gene_01050.t1,gene_03418.t1,gene_10253.t1,gene_03677.t1,gene_01348.t1,gene_02513.t1,gene_02542.t1,gene_03582.t1,gene_04057.t1,gene_01449.t1,gene_00985.t1,gene_07678.t1 | | mediator complex | cellular_component |
| GO:0016021 | 1940 | gene_04214.t1,gene_07014.t1,gene_04689.t1,gene_01489.t1,gene_04805.t1,gene_09951.t1,gene_00930.t1,gene_02649.t1,gene_07664.t1,gene_08774.t1,gene_09685.t1,gene_07182.t1,gene_04164.t1,gene_07225.t1,gene_00469.t1,gene_10062.t1,gene_09837.t1,gene_09632.t1,gene_02069.t1,gene_05751.t1,gene_06986.t1,gene_03620.t1,gene_02482.t1,gene_02975.t1,gene_00471.t1,gene_00261.t1,gene_06678.t1,gene_06954.t1,gene_03319.t1,gene_03478.t1,gene_08625.t1,gene_00174.t1,gene_05949.t1,gene_10092.t1,gene_08850.t1,gene_04787.t1,gene_08571.t1,gene_05754.t1,gene_10659.t1,gene_04065.t1,gene_07786.t1,gene_01350.t1,gene_01244.t1,gene_00784.t1,gene_03044.t1,gene_06206.t1,gene_03749.t1,gene_08370.t1,gene_06201.t1,gene_03306.t1,gene_06543.t1,gene_02213.t1,gene_06182.t1,gene_03976.t1,gene_02533.t1,gene_05255.t1,gene_07338.t1,gene_05352.t1,gene_06230.t1,gene_00823.t1,gene_01892.t1,gene_03841.t1,gene_06984.t1,gene_01067.t1,gene_10605.t1,gene_09187.t1,gene_01749.t1,gene_02555.t1,gene_07553.t1,gene_04283.t1,gene_05994.t1,gene_10228.t1,gene_08673.t1,gene_09288.t1,gene_10349.t1,gene_00349.t1,gene_03055.t1,gene_01170.t1,gene_03843.t1,gene_03879.t1,gene_07591.t1,gene_07220.t1,gene_07072.t1,gene_06479.t1,gene_09252.t1,gene_02008.t1,gene_00354.t1,gene_07151.t1,gene_04123.t1,gene_08902.t1, | | integral component of membrane | cellular_component |

**Table S3 Detailed Gene Ontology (GO) classification of protein families in the genome of *P. paneum* OM1 (*Continued*)**

| **GO ID** | **Seq Num** | | **Seq List** | **GO term** | **Category** |
| --- | --- | --- | --- | --- | --- |
| GO:0016021 | 1940 | gene_07372.t1,gene_02999.t1,gene_01150.t1,gene_05333.t1,gene_07516.t1,gene_09150.t1,gene_05628.t1,gene_08446.t1,gene_06180.t1,gene_06541.t1,gene_03053.t1,gene_01711.t1,gene_08583.t1,gene_08493.t1,gene_07022.t1,gene_00383.t1,gene_04472.t1,gene_08098.t1,gene_00071.t1,gene_05295.t1,gene_06286.t1,gene_06133.t1,gene_05234.t1,gene_00820.t1,gene_02871.t1,gene_07551.t1,gene_07002.t1,gene_04451.t1,gene_00770.t1,gene_05649.t1,gene_01895.t1,gene_00003.t1,gene_05343.t1,gene_03371.t1,gene_05326.t1,gene_00825.t1,gene_06601.t1,gene_03482.t1,gene_02400.t1,gene_07107.t1,gene_04268.t1,gene_01056.t1,gene_03992.t1,gene_09620.t1,gene_00796.t1,gene_07140.t1,gene_06363.t1,gene_07915.t1,gene_00135.t1,gene_01779.t1,gene_06275.t1,gene_00100.t1,gene_08915.t1,gene_08958.t1,gene_07568.t1,gene_04468.t1,gene_10321.t1,gene_09029.t1,gene_01654.t1,gene_08751.t1,gene_00733.t1,gene_05983.t1,gene_03699.t1,gene_03251.t1,gene_08156.t1,gene_03571.t1,gene_04506.t1,gene_09108.t1,gene_04350.t1,gene_02598.t1,gene_06170.t1,gene_09309.t1,gene_07093.t1,gene_00744.t1,gene_06925.t1,gene_02398.t1,gene_08406.t1,gene_10515.t1,gene_07257.t1,gene_03156.t1,gene_10077.t1,gene_08121.t1,gene_07318.t1,gene_04813.t1,gene_07593.t1,gene_02189.t1,gene_07486.t1,gene_09919.t1,gene_06927.t1,gene_05642.t1,gene_04754.t1,gene_09452.t1,gene_09188.t1,gene_03023.t1,gene_03411.t1,gene_09352.t1,gene_08435.t1,gene_07345.t1,gene_04653.t1,gene_00530.t1,gene_07559.t1,gene_09468.t1,gene_04201.t1,gene_06887.t1,gene_09306.t1,gene_06797.t1,gene_04581.t1,gene_06093.t1,gene_02889.t1,gene_10406.t1,gene_04334.t1,gene_10048.t1,gene_06684.t1,gene_01254.t1,gene_05608.t1,gene_05176.t1,gene_04151.t1,gene_05566.t1,gene_07108.t1,gene_03154.t1,gene_07000.t1,gene_03733.t1,gene_02494.t1,gene_09422.t1,gene_00710.t1,gene_00276.t1,gene_04210.t1,gene_07227.t1,gene_07765.t1,gene_00828.t1,gene_05903.t1,gene_04499.t1,gene_08236.t1,gene_00250.t1,gene_03007.t1,gene_07729.t1,gene_08312.t1,gene_02904.t1,gene_05038.t1,gene_03798.t1,gene_02936.t1,gene_05761.t1,gene_00069.t1,gene_05780.t1,gene_00835.t1,gene_04318.t1,gene_03547.t1,gene_07398.t1,gene_00153.t1,gene_07416.t1,gene_07995.t1,gene_02316.t1,gene_06375.t1,gene_09659.t1,gene_05098.t1,gene_06039.t1,gene_09926.t1,gene_09643.t1,gene_00057.t1,gene_05935.t1,gene_00941.t1,gene_03083.t1,gene_08000.t1,gene_03018.t1,gene_06689.t1,gene_02414.t1,gene_09714.t1,gene_08935.t1,gene_04908.t1,gene_07491.t1,gene_09785.t1,gene_01671.t1,gene_09522.t1,gene_02886.t1,gene_02440.t1,gene_01595.t1,gene_01450.t1,gene_07616.t1,gene_03409.t1,gene_01640.t1, | | integral component of membrane | cellular_component |

**Table S3 Detailed Gene Ontology (GO) classification of protein families in the genome of *P. paneum* OM1 (*Continued*)**

| **GO ID** | **Seq Num** | | **Seq List** | **GO term** | **Category** |
| --- | --- | --- | --- | --- | --- |
| GO:0016021 | 1940 | gene_00525.t1,gene_00480.t1,gene_05117.t1,gene_00647.t1,gene_03323.t1,gene_07201.t1,gene_07033.t1,gene_10041.t1,gene_09487.t1,gene_06888.t1,gene_08171.t1,gene_04434.t1,gene_09147.t1,gene_08039.t1,gene_08250.t1,gene_02696.t1,gene_05548.t1,gene_07369.t1,gene_07737.t1,gene_01577.t1,gene_04541.t1,gene_09383.t1,gene_08056.t1,gene_02173.t1,gene_00175.t1,gene_00073.t1,gene_01781.t1,gene_10399.t1,gene_05952.t1,gene_00331.t1,gene_03502.t1,gene_05882.t1,gene_05245.t1,gene_05465.t1,gene_07238.t1,gene_08549.t1,gene_03958.t1,gene_06116.t1,gene_06091.t1,gene_01909.t1,gene_09060.t1,gene_07919.t1,gene_09970.t1,gene_05467.t1,gene_03287.t1,gene_10640.t1,gene_07083.t1,gene_00641.t1,gene_01318.t1,gene_01331.t1,gene_09232.t1,gene_10206.t1,gene_10193.t1,gene_09047.t1,gene_09331.t1,gene_08140.t1,gene_00215.t1,gene_06362.t1,gene_10504.t1,gene_06107.t1,gene_03560.t1,gene_04493.t1,gene_05310.t1,gene_10046.t1,gene_01906.t1,gene_07414.t1,gene_02738.t1,gene_05126.t1,gene_02820.t1,gene_00177.t1,gene_05929.t1,gene_08553.t1,gene_05380.t1,gene_06496.t1,gene_01919.t1,gene_04005.t1,gene_05569.t1,gene_00602.t1,gene_05303.t1,gene_08883.t1,gene_00896.t1,gene_05102.t1,gene_05657.t1,gene_10368.t1,gene_06588.t1,gene_07025.t1,gene_01410.t1,gene_02753.t1,gene_06533.t1,gene_04756.t1,gene_06285.t1,gene_03368.t1,gene_06790.t1,gene_07552.t1,gene_10147.t1,gene_02031.t1,gene_07131.t1,gene_00755.t1,gene_09812.t1,gene_03153.t1,gene_04348.t1,gene_08068.t1,gene_06128.t1,gene_02647.t1,gene_09176.t1,gene_06049.t1,gene_09103.t1,gene_04122.t1,gene_10472.t1,gene_06301.t1,gene_09101.t1,gene_00333.t1,gene_06175.t1,gene_01086.t1,gene_05719.t1,gene_01709.t1,gene_02471.t1,gene_08013.t1,gene_04881.t1,gene_05542.t1,gene_08275.t1,gene_01241.t1,gene_01412.t1,gene_05090.t1,gene_10068.t1,gene_08669.t1,gene_08227.t1,gene_07569.t1,gene_05187.t1,gene_02884.t1,gene_09868.t1,gene_09069.t1,gene_06904.t1,gene_04746.t1,gene_06965.t1,gene_05092.t1,gene_03436.t1,gene_02058.t1,gene_05667.t1,gene_00555.t1,gene_09185.t1,gene_00317.t1,gene_10331.t1,gene_06924.t1,gene_07136.t1,gene_03058.t1,gene_01525.t1,gene_05432.t1,gene_09662.t1,gene_06508.t1,gene_04758.t1,gene_09133.t1,gene_10163.t1,gene_06574.t1,gene_02515.t1,gene_06926.t1,gene_04249.t1,gene_05290.t1,gene_07725.t1,gene_06519.t1,gene_09189.t1,gene_02508.t1,gene_02561.t1,gene_03628.t1,gene_01685.t1,gene_04191.t1,gene_01531.t1,gene_02275.t1,gene_04170.t1,gene_09205.t1,gene_07967.t1,gene_08128.t1,gene_04025.t1,gene_04068.t1,gene_09286.t1,gene_00118.t1,gene_09671.t1,gene_03877.t1,gene_00200.t1,gene_03882.t1, | | integral component of membrane | cellular_component |

**Table S3 Detailed Gene Ontology (GO) classification of protein families in the genome of *P. paneum* OM1 (*Continued*)**

| **GO ID** | **Seq Num** | | **Seq List** | **GO term** | **Category** |
| --- | --- | --- | --- | --- | --- |
| GO:0016021 | 1940 | gene_07967.t1,gene_08128.t1,gene_04025.t1,gene_04068.t1,gene_09286.t1,gene_00118.t1,gene_09671.t1,gene_03877.t1,gene_00200.t1,gene_03882.t1,gene_00567.t1,gene_00764.t1,gene_08352.t1,gene_08414.t1,gene_08459.t1,gene_03215.t1,gene_09085.t1,gene_07018.t1,gene_02076.t1,gene_03039.t1,gene_01807.t1,gene_04138.t1,gene_08950.t1,gene_02675.t1,gene_05089.t1,gene_03425.t1,gene_07672.t1,gene_04995.t1,gene_03389.t1,gene_01379.t1,gene_06453.t1,gene_03329.t1,gene_05991.t1,gene_02677.t1,gene_02539.t1,gene_06177.t1,gene_07745.t1,gene_00036.t1,gene_05285.t1,gene_10459.t1,gene_00666.t1,gene_01136.t1,gene_04168.t1,gene_01121.t1,gene_09207.t1,gene_03277.t1,gene_05817.t1,gene_02439.t1,gene_04809.t1,gene_02039.t1,gene_05357.t1,gene_08888.t1,gene_01123.t1,gene_01814.t1,gene_03910.t1,gene_05537.t1,gene_10651.t1,gene_06507.t1,gene_00807.t1,gene_05878.t1,gene_06432.t1,gene_10096.t1,gene_06510.t1,gene_01448.t1,gene_01913.t1,gene_00025.t1,gene_00926.t1,gene_03002.t1,gene_03403.t1,gene_08284.t1,gene_09740.t1,gene_02772.t1,gene_09972.t1,gene_05576.t1,gene_04035.t1,gene_02837.t1,gene_08886.t1,gene_02847.t1,gene_05758.t1,gene_00739.t1,gene_04440.t1,gene_00743.t1,gene_01215.t1,gene_05406.t1,gene_06386.t1,gene_05275.t1,gene_10217.t1,gene_07637.t1,gene_05114.t1,gene_04457.t1,gene_09018.t1,gene_10519.t1,gene_00038.t1,gene_02710.t1,gene_05116.t1,gene_09000.t1,gene_07273.t1,gene_03082.t1,gene_03075.t1,gene_04716.t1,gene_03019.t1,gene_08714.t1,gene_06863.t1,gene_06850.t1,gene_03526.t1,gene_04256.t1,gene_07920.t1,gene_03439.t1,gene_01083.t1,gene_09854.t1,gene_06818.t1,gene_05179.t1,gene_10534.t1,gene_00224.t1,gene_03787.t1,gene_07117.t1,gene_00914.t1,gene_09559.t1,gene_09804.t1,gene_03045.t1,gene_07824.t1,gene_10536.t1,gene_08453.t1,gene_07968.t1,gene_10419.t1,gene_00086.t1,gene_05748.t1,gene_08116.t1,gene_09269.t1,gene_07775.t1,gene_00152.t1,gene_10142.t1,gene_07218.t1,gene_01084.t1,gene_03457.t1,gene_08451.t1,gene_09872.t1,gene_07451.t1,gene_09139.t1,gene_10604.t1,gene_03043.t1,gene_10514.t1,gene_04394.t1,gene_00379.t1,gene_00736.t1,gene_06254.t1,gene_09168.t1,gene_09218.t1,gene_05766.t1,gene_00240.t1,gene_08267.t1,gene_02547.t1,gene_00114.t1,gene_06726.t1,gene_10251.t1,gene_09889.t1,gene_06328.t1,gene_00590.t1,gene_07809.t1,gene_06724.t1,gene_02072.t1,gene_05773.t1,gene_01507.t1,gene_04514.t1,gene_01211.t1,gene_00716.t1,gene_05349.t1,gene_04668.t1,gene_06347.t1,gene_06293.t1,gene_00467.t1,gene_03684.t1,gene_01461.t1,gene_02872.t1,gene_05926.t1,gene_03238.t1,gene_02621.t1,gene_04840.t1,gene_06931.t1,gene_00070.t1, | | integral component of membrane | cellular_component |

**Table S3 Detailed Gene Ontology (GO) classification of protein families in the genome of *P. paneum* OM1 (*Continued*)**

| **GO ID** | **Seq Num** | | **Seq List** | **GO term** | **Category** |
| --- | --- | --- | --- | --- | --- |
| GO:0016021 | 1940 | gene_10079.t1,gene_01239.t1,gene_05634.t1,gene_01862.t1,gene_01724.t1,gene_09142.t1,gene_01324.t1,gene_03078.t1,gene_08991.t1,gene_06084.t1,gene_03370.t1,gene_06246.t1,gene_05202.t1,gene_10473.t1,gene_02401.t1,gene_07365.t1,gene_10329.t1,gene_00948.t1,gene_01657.t1,gene_02394.t1,gene_03695.t1,gene_08807.t1,gene_10553.t1,gene_08061.t1,gene_00734.t1,gene_04393.t1,gene_00389.t1,gene_01413.t1,gene_06384.t1,gene_04469.t1,gene_03291.t1,gene_01476.t1,gene_04141.t1,gene_03032.t1,gene_05458.t1,gene_03305.t1,gene_07382.t1,gene_00296.t1,gene_01944.t1,gene_02245.t1,gene_09386.t1,gene_00081.t1,gene_10428.t1,gene_03383.t1,gene_02839.t1,gene_00810.t1,gene_09890.t1,gene_09456.t1,gene_00890.t1,gene_06910.t1,gene_08480.t1,gene_06772.t1,gene_04990.t1,gene_00021.t1,gene_06052.t1,gene_01816.t1,gene_06610.t1,gene_08242.t1,gene_09681.t1,gene_09975.t1,gene_05433.t1,gene_00927.t1,gene_06294.t1,gene_00392.t1,gene_01697.t1,gene_04204.t1,gene_10094.t1,gene_00489.t1,gene_01968.t1,gene_09453.t1,gene_09460.t1,gene_08972.t1,gene_09565.t1,gene_08302.t1,gene_08010.t1,gene_03318.t1,gene_06368.t1,gene_08462.t1,gene_04527.t1,gene_05401.t1,gene_08627.t1,gene_05633.t1,gene_00571.t1,gene_08165.t1,gene_02930.t1,gene_10110.t1,gene_04488.t1,gene_09752.t1,gene_07697.t1,gene_00586.t1,gene_08978.t1,gene_00533.t1,gene_02493.t1,gene_00898.t1,gene_02693.t1,gene_09902.t1,gene_06933.t1,gene_00006.t1,gene_00047.t1,gene_10278.t1,gene_03426.t1,gene_08621.t1,gene_06167.t1,gene_09826.t1,gene_05108.t1,gene_06263.t1,gene_08932.t1,gene_10031.t1,gene_02237.t1,gene_04325.t1,gene_04199.t1,gene_08166.t1,gene_03902.t1,gene_10302.t1,gene_03171.t1,gene_05325.t1,gene_03004.t1,gene_02283.t1,gene_06004.t1,gene_09345.t1,gene_06499.t1,gene_10621.t1,gene_09099.t1,gene_04211.t1,gene_02294.t1,gene_04525.t1,gene_07969.t1,gene_03897.t1,gene_04054.t1,gene_04328.t1,gene_04961.t1,gene_05544.t1,gene_02731.t1,gene_10493.t1,gene_01474.t1,gene_09634.t1,gene_10025.t1,gene_07281.t1,gene_04156.t1,gene_00622.t1,gene_02204.t1,gene_03381.t1,gene_07422.t1,gene_02262.t1,gene_01571.t1,gene_06038.t1,gene_02026.t1,gene_10521.t1,gene_09603.t1,gene_08851.t1,gene_09739.t1,gene_02315.t1,gene_09782.t1,gene_02209.t1,gene_08133.t1,gene_07880.t1,gene_07581.t1,gene_04644.t1,gene_05934.t1,gene_07340.t1,gene_06545.t1,gene_05356.t1,gene_09335.t1,gene_09510.t1,gene_10401.t1,gene_00834.t1,gene_10284.t1,gene_02887.t1,gene_03464.t1,gene_08925.t1,gene_07990.t1,gene_03996.t1,gene_00836.t1,gene_01225.t1,gene_01912.t1,gene_10403.t1,gene_08868.t1,gene_07269.t1,gene_01166.t1,gene_00584.t1, | | integral component of membrane | cellular_component |

**Table S3 Detailed Gene Ontology (GO) classification of protein families in the genome of *P. paneum* OM1 (*Continued*)**

| **GO ID** | **Seq Num** | | **Seq List** | **GO term** | **Category** |
| --- | --- | --- | --- | --- | --- |
| GO:0016021 | 1940 | gene_08912.t1,gene_07579.t1,gene_06026.t1,gene_03488.t1,gene_03166.t1,gene_01929.t1,gene_08677.t1,gene_05565.t1,gene_03337.t1,gene_05495.t1,gene_01994.t1,gene_03028.t1,gene_02295.t1,gene_06942.t1,gene_07230.t1,gene_04595.t1,gene_09776.t1,gene_01052.t1,gene_08003.t1,gene_01385.t1,gene_07141.t1,gene_00130.t1,gene_00183.t1,gene_00072.t1,gene_03335.t1,gene_09243.t1,gene_03361.t1,gene_08413.t1,gene_01208.t1,gene_06469.t1,gene_04476.t1,gene_09063.t1,gene_04539.t1,gene_00123.t1,gene_02901.t1,gene_06889.t1,gene_06619.t1,gene_02059.t1,gene_00933.t1,gene_08968.t1,gene_02709.t1,gene_03296.t1,gene_03286.t1,gene_05412.t1,gene_02308.t1,gene_07573.t1,gene_08127.t1,gene_09305.t1,gene_06414.t1,gene_05048.t1,gene_00954.t1,gene_03490.t1,gene_07155.t1,gene_03561.t1,gene_05298.t1,gene_09106.t1,gene_02140.t1,gene_06489.t1,gene_04562.t1,gene_08408.t1,gene_08970.t1,gene_04666.t1,gene_06155.t1,gene_05127.t1,gene_00915.t1,gene_02938.t1,gene_09558.t1,gene_01245.t1,gene_01583.t1,gene_03363.t1,gene_06894.t1,gene_10033.t1,gene_00665.t1,gene_03485.t1,gene_09344.t1,gene_05470.t1,gene_06693.t1,gene_01440.t1,gene_07529.t1,gene_09360.t1,gene_04130.t1,gene_08582.t1,gene_09507.t1,gene_01105.t1,gene_00203.t1,gene_01832.t1,gene_01453.t1,gene_02505.t1,gene_01460.t1,gene_06504.t1,gene_05386.t1,gene_01219.t1,gene_06536.t1,gene_01522.t1,gene_05113.t1,gene_05381.t1,gene_09430.t1,gene_04063.t1,gene_09821.t1,gene_04305.t1,gene_00120.t1,gene_01384.t1,gene_00782.t1,gene_04053.t1,gene_03941.t1,gene_06300.t1,gene_09521.t1,gene_03201.t1,gene_00065.t1,gene_03003.t1,gene_03943.t1,gene_03776.t1,gene_04113.t1,gene_07279.t1,gene_06127.t1,gene_02824.t1,gene_02305.t1,gene_09104.t1,gene_01303.t1,gene_00281.t1,gene_09676.t1,gene_04926.t1,gene_01917.t1,gene_00418.t1,gene_07526.t1,gene_04316.t1,gene_04357.t1,gene_01031.t1,gene_09866.t1,gene_08254.t1,gene_00350.t1,gene_06085.t1,gene_09183.t1,gene_08971.t1,gene_04080.t1,gene_02895.t1,gene_02310.t1,gene_02500.t1,gene_04194.t1,gene_06746.t1,gene_05068.t1,gene_04452.t1,gene_08448.t1,gene_10552.t1,gene_01317.t1,gene_02789.t1,gene_01741.t1,gene_04757.t1,gene_03665.t1,gene_04275.t1,gene_05781.t1,gene_05223.t1,gene_07558.t1,gene_07124.t1,gene_00966.t1,gene_01502.t1,gene_04932.t1,gene_06047.t1,gene_01255.t1,gene_07657.t1,gene_01500.t1,gene_08298.t1,gene_01817.t1,gene_01108.t1,gene_06616.t1,gene_03826.t1,gene_08243.t1,gene_03352.t1,gene_01041.t1,gene_00393.t1,gene_09691.t1,gene_02640.t1,gene_05120.t1,gene_06583.t1,gene_01806.t1,gene_07213.t1,gene_01891.t1,gene_02826.t1,gene_01235.t1,gene_02576.t1, | | integral component of membrane | cellular_component |

**Table S3 Detailed Gene Ontology (GO) classification of protein families in the genome of *P. paneum* OM1 (*Continued*)**

| **GO ID** | **Seq Num** | | **Seq List** | **GO term** | **Category** |
| --- | --- | --- | --- | --- | --- |
| GO:0016021 | 1940 | gene_02642.t1,gene_09134.t1,gene_05347.t1,gene_09054.t1,gene_10133.t1,gene_04526.t1,gene_01021.t1,gene_07026.t1,gene_01905.t1,gene_04498.t1,gene_08936.t1,gene_05464.t1,gene_03246.t1,gene_09732.t1,gene_04970.t1,gene_04426.t1,gene_06422.t1,gene_10123.t1,gene_02782.t1,gene_02041.t1,gene_03407.t1,gene_08687.t1,gene_06992.t1,gene_07097.t1,gene_00016.t1,gene_08198.t1,gene_06178.t1,gene_03379.t1,gene_09181.t1,gene_00220.t1,gene_09121.t1,gene_01611.t1,gene_09472.t1,gene_02105.t1,gene_01777.t1,gene_04377.t1,gene_10115.t1,gene_05338.t1,gene_00552.t1,gene_08823.t1,gene_01677.t1,gene_10656.t1,gene_04212.t1,gene_06570.t1,gene_00293.t1,gene_00034.t1,gene_08158.t1,gene_02441.t1,gene_04229.t1,gene_01247.t1,gene_10400.t1,gene_01795.t1,gene_06871.t1,gene_00051.t1,gene_10672.t1,gene_07434.t1,gene_04715.t1,gene_06325.t1,gene_09766.t1,gene_02116.t1,gene_02762.t1,gene_06565.t1,gene_09934.t1,gene_08960.t1,gene_03782.t1,gene_08909.t1,gene_07578.t1,gene_06762.t1,gene_00178.t1,gene_04825.t1,gene_07436.t1,gene_01290.t1,gene_00888.t1,gene_02153.t1,gene_01405.t1,gene_05505.t1,gene_08683.t1,gene_10118.t1,gene_03253.t1,gene_03255.t1,gene_01787.t1,gene_01593.t1,gene_08671.t1,gene_00749.t1,gene_10166.t1,gene_02897.t1,gene_01549.t1,gene_00131.t1,gene_04733.t1,gene_05085.t1,gene_09696.t1,gene_08954.t1,gene_08853.t1,gene_08086.t1,gene_06701.t1,gene_07101.t1,gene_01632.t1,gene_01194.t1,gene_00133.t1,gene_06980.t1,gene_08597.t1,gene_09694.t1,gene_07103.t1,gene_01275.t1,gene_02460.t1,gene_04999.t1,gene_00022.t1,gene_04466.t1,gene_01366.t1,gene_05940.t1,gene_09763.t1,gene_04692.t1,gene_08725.t1,gene_04984.t1,gene_04059.t1,gene_01257.t1,gene_04010.t1,gene_05094.t1,gene_07740.t1,gene_03108.t1,gene_06594.t1,gene_09432.t1,gene_07427.t1,gene_03345.t1,gene_01523.t1,gene_04167.t1,gene_04718.t1,gene_00428.t1,gene_02990.t1,gene_03458.t1,gene_06388.t1,gene_02051.t1,gene_07224.t1,gene_00068.t1,gene_03106.t1,gene_09363.t1,gene_07425.t1,gene_05379.t1,gene_01539.t1,gene_07069.t1,gene_04495.t1,gene_05987.t1,gene_04401.t1,gene_08607.t1,gene_09016.t1,gene_07186.t1,gene_07648.t1,gene_01258.t1,gene_07652.t1,gene_07702.t1,gene_01421.t1,gene_08487.t1,gene_04574.t1,gene_03578.t1,gene_00852.t1,gene_02760.t1,gene_08814.t1,gene_06164.t1,gene_05848.t1,gene_08360.t1,gene_07834.t1,gene_00172.t1,gene_08766.t1,gene_04576.t1,gene_01419.t1,gene_04463.t1,gene_03484.t1,gene_10102.t1,gene_05800.t1,gene_00659.t1,gene_00425.t1,gene_02010.t1,gene_08392.t1,gene_09657.t1,gene_03131.t1,gene_01924.t1,gene_10646.t1,gene_05692.t1,gene_09675.t1,gene_06354.t1, | | integral component of membrane | cellular_component |

**Table S3 Detailed Gene Ontology (GO) classification of protein families in the genome of *P. paneum* OM1 (*Continued*)**

| **GO ID** | **Seq Num** | | **Seq List** | **GO term** | **Category** |
| --- | --- | --- | --- | --- | --- |
| GO:0016021 | 1940 | gene_00425.t1,gene_02010.t1,gene_08392.t1,gene_09657.t1,gene_03131.t1,gene_01924.t1,gene_10646.t1,gene_05692.t1,gene_09675.t1,gene_06354.t1,gene_01833.t1,gene_03133.t1,gene_05309.t1,gene_04029.t1,gene_10152.t1,gene_08297.t1,gene_01442.t1,gene_10298.t1,gene_10250.t1,gene_05533.t1,gene_09213.t1,gene_02475.t1,gene_04389.t1,gene_02370.t1,gene_05131.t1,gene_07258.t1,gene_02807.t1,gene_00841.t1,gene_07597.t1,gene_01485.t1,gene_04710.t1,gene_01285.t1,gene_00456.t1,gene_00673.t1,gene_00934.t1,gene_00611.t1,gene_05473.t1,gene_02949.t1,gene_03386.t1,gene_01062.t1,gene_08939.t1,gene_05111.t1,gene_05129.t1,gene_08757.t1,gene_09007.t1,gene_01867.t1,gene_00014.t1,gene_04205.t1,gene_07976.t1,gene_06803.t1,gene_00688.t1,gene_06836.t1,gene_02544.t1,gene_00211.t1,gene_01660.t1,gene_10638.t1,gene_05011.t1,gene_06057.t1,gene_10511.t1,gene_04317.t1,gene_06936.t1,gene_10247.t1,gene_07262.t1,gene_08164.t1,gene_03149.t1,gene_03364.t1,gene_05447.t1,gene_10034.t1,gene_05434.t1,gene_07584.t1,gene_01686.t1,gene_01690.t1,gene_09964.t1,gene_09356.t1,gene_04602.t1,gene_05629.t1,gene_10571.t1,gene_09467.t1,gene_03872.t1,gene_02963.t1,gene_08458.t1,gene_03300.t1,gene_02335.t1,gene_10237.t1,gene_08112.t1,gene_09354.t1,gene_03936.t1,gene_03375.t1,gene_09028.t1,gene_03612.t1,gene_06173.t1,gene_08829.t1,gene_04027.t1,gene_01263.t1,gene_04896.t1,gene_08200.t1,gene_05802.t1,gene_02742.t1,gene_04592.t1,gene_08848.t1,gene_05194.t1,gene_03348.t1,gene_02676.t1,gene_09852.t1,gene_03229.t1,gene_07631.t1,gene_09955.t1,gene_10671.t1,gene_05488.t1,gene_08163.t1,gene_08773.t1,gene_06064.t1,gene_09574.t1,gene_10007.t1,gene_09300.t1,gene_01950.t1,gene_05775.t1,gene_04697.t1,gene_06952.t1,gene_08278.t1,gene_01475.t1,gene_00788.t1,gene_03586.t1,gene_10627.t1,gene_00809.t1,gene_06753.t1,gene_09552.t1,gene_10235.t1,gene_05863.t1,gene_00740.t1,gene_08230.t1,gene_06472.t1,gene_08892.t1,gene_07517.t1,gene_08440.t1,gene_02462.t1,gene_09144.t1,gene_06470.t1,gene_07330.t1,gene_02736.t1,gene_04055.t1,gene_06233.t1,gene_09230.t1,gene_04003.t1,gene_07615.t1,gene_03092.t1,gene_07455.t1,gene_08928.t1,gene_08860.t1,gene_07280.t1,gene_07918.t1,gene_09650.t1,gene_01165.t1,gene_08457.t1,gene_09564.t1,gene_02943.t1,gene_07144.t1,gene_03596.t1,gene_08383.t1,gene_00110.t1,gene_07515.t1,gene_02584.t1,gene_05351.t1,gene_01644.t1,gene_10012.t1,gene_07362.t1,gene_09493.t1,gene_08666.t1,gene_04673.t1,gene_08072.t1,gene_03336.t1,gene_08911.t1,gene_00374.t1,gene_06281.t1,gene_09393.t1,gene_01404.t1,gene_05086.t1,gene_02802.t1,gene_06075.t1,gene_07501.t1, | | integral component of membrane | cellular_component |

**Table S3 Detailed Gene Ontology (GO) classification of protein families in the genome of *P. paneum* OM1 (*Continued*)**

| **GO ID** | **Seq Num** | | **Seq List** | **GO term** | **Category** |
| --- | --- | --- | --- | --- | --- |
| GO:0016021 | 1940 | gene_07988.t1,gene_03623.t1,gene_04500.t1,gene_05487.t1,gene_06197.t1,gene_05229.t1,gene_03316.t1,gene_02879.t1,gene_07391.t1,gene_09441.t1,gene_08412.t1,gene_06279.t1,gene_00090.t1,gene_09132.t1,gene_07175.t1,gene_00278.t1,gene_03065.t1,gene_05492.t1,gene_00790.t1,gene_09566.t1,gene_06564.t1,gene_10085.t1,gene_03498.t1,gene_04265.t1,gene_01153.t1,gene_08702.t1,gene_07492.t1,gene_04703.t1,gene_00792.t1,gene_05941.t1,gene_00385.t1,gene_09465.t1,gene_09340.t1,gene_06822.t1,gene_05476.t1,gene_07679.t1,gene_09550.t1,gene_02530.t1,gene_10439.t1,gene_02961.t1,gene_03334.t1,gene_07197.t1,gene_02234.t1,gene_02005.t1,gene_06218.t1,gene_10388.t1,gene_09755.t1,gene_04901.t1,gene_05520.t1,gene_05474.t1,gene_08750.t1,gene_03218.t1,gene_05730.t1,gene_07195.t1,gene_05243.t1,gene_09310.t1,gene_10308.t1,gene_07624.t1,gene_01007.t1,gene_09615.t1,gene_09658.t1,gene_05054.t1,gene_08410.t1,gene_00476.t1,gene_04639.t1,gene_05297.t1,gene_08178.t1,gene_05316.t1,gene_05268.t1,gene_06264.t1,gene_01969.t1,gene_10157.t1,gene_01638.t1,gene_06692.t1,gene_01075.t1,gene_00892.t1,gene_09940.t1,gene_08478.t1,gene_10055.t1,gene_06404.t1,gene_04683.t1,gene_06152.t1,gene_06342.t1,gene_07490.t1,gene_08689.t1,gene_05501.t1,gene_07205.t1,gene_05616.t1,gene_03239.t1,gene_01855.t1,gene_07187.t1,gene_08561.t1,gene_04215.t1,gene_05448.t1,gene_02410.t1,gene_09836.t1,gene_03031.t1,gene_06290.t1,gene_04575.t1,gene_07756.t1,gene_09778.t1,gene_03504.t1,gene_08258.t1,gene_04721.t1,gene_05622.t1,gene_03794.t1,gene_03884.t1,gene_08642.t1,gene_04304.t1,gene_09834.t1,gene_04577.t1,gene_03223.t1,gene_09922.t1,gene_04478.t1,gene_03506.t1,gene_01370.t1,gene_03993.t1,gene_10423.t1,gene_02246.t1,gene_02527.t1,gene_10101.t1,gene_02828.t1,gene_02319.t1,gene_09984.t1,gene_09623.t1,gene_08259.t1,gene_01082.t1,gene_09861.t1,gene_01299.t1,gene_09105.t1,gene_04064.t1,gene_01230.t1,gene_02147.t1,gene_04634.t1,gene_04679.t1,gene_09431.t1,gene_01945.t1,gene_06487.t1,gene_02130.t1,gene_09471.t1,gene_06183.t1,gene_05143.t1,gene_02532.t1,gene_05744.t1,gene_04887.t1,gene_06813.t1,gene_06010.t1,gene_06424.t1,gene_08859.t1,gene_09240.t1,gene_09800.t1,gene_07674.t1,gene_10434.t1,gene_10081.t1,gene_04991.t1,gene_01925.t1,gene_07594.t1,gene_08598.t1,gene_00243.t1,gene_02081.t1,gene_05746.t1,gene_01986.t1,gene_08449.t1,gene_08223.t1,gene_08263.t1,gene_02343.t1,gene_08216.t1,gene_06238.t1,gene_08839.t1,gene_07629.t1,gene_10288.t1,gene_08359.t1,gene_04584.t1,gene_05670.t1,gene_01494.t1,gene_10563.t1,gene_01689.t1,gene_08876.t1,gene_06937.t1,gene_07966.t1, | | integral component of membrane | cellular_component |

**Table S3 Detailed Gene Ontology (GO) classification of protein families in the genome of *P. paneum* OM1 (*Continued*)**

| **GO ID** | **Seq Num** | | **Seq List** | **GO term** | **Category** |
| --- | --- | --- | --- | --- | --- |
| GO:0016021 | 1940 | gene_07125.t1,gene_07223.t1,gene_02876.t1,gene_01178.t1,gene_10274.t1,gene_00670.t1,gene_00127.t1,gene_06272.t1,gene_01496.t1,gene_09798.t1,gene_04073.t1,gene_03816.t1,gene_09369.t1,gene_02407.t1,gene_04473.t1,gene_00316.t1,gene_02680.t1,gene_02236.t1,gene_10650.t1,gene_08741.t1,gene_01304.t1,gene_06190.t1,gene_03545.t1,gene_03570.t1,gene_06048.t1,gene_06538.t1,gene_09159.t1,gene_06421.t1,gene_00197.t1,gene_00570.t1,gene_00777.t1,gene_03430.t1,gene_10052.t1,gene_03572.t1,gene_05939.t1,gene_07485.t1,gene_01584.t1,gene_02070.t1,gene_06680.t1,gene_00195.t1,gene_05461.t1,gene_06671.t1,gene_04968.t1,gene_02397.t1,gene_01447.t1,gene_04552.t1,gene_04521.t1,gene_09901.t1,gene_09786.t1,gene_03177.t1,gene_09811.t1,gene_05982.t1,gene_02093.t1,gene_03333.t1,gene_02024.t1,gene_06748.t1,gene_05296.t1,gene_02191.t1,gene_07727.t1,gene_04274.t1,gene_01445.t1,gene_02663.t1,gene_04550.t1,gene_09455.t1,gene_09129.t1,gene_08219.t1,gene_01747.t1,gene_08065.t1,gene_04734.t1,gene_03796.t1,gene_09257.t1,gene_02193.t1,gene_00290.t1,gene_06968.t1,gene_01116.t1,gene_00553.t1,gene_06305.t1,gene_06715.t1,gene_03648.t1,gene_08498.t1,gene_07556.t1,gene_03412.t1,gene_10006.t1,gene_06509.t1,gene_02848.t1,gene_06525.t1,gene_00459.t1,gene_05727.t1,gene_02458.t1,gene_01794.t1,gene_00679.t1,gene_09651.t1,gene_01468.t1,gene_07099.t1,gene_02624.t1,gene_05561.t1,gene_09545.t1,gene_04126.t1,gene_00461.t1,gene_07874.t1,gene_02299.t1,gene_00575.t1,gene_07463.t1,gene_07423.t1,gene_06485.t1,gene_03783.t1,gene_03470.t1,gene_00797.t1,gene_00577.t1,gene_02248.t1,gene_04100.t1,gene_05419.t1,gene_06017.t1,gene_02979.t1,gene_07832.t1,gene_07019.t1,gene_06898.t1,gene_10258.t1,gene_10004.t1,gene_08143.t1,gene_03093.t1,gene_05836.t1,gene_07691.t1,gene_02896.t1,gene_00662.t1,gene_02368.t1,gene_00277.t1,gene_01101.t1,gene_03282.t1,gene_00063.t1,gene_05191.t1,gene_02812.t1,gene_03211.t1,gene_06655.t1,gene_09913.t1,gene_05437.t1,gene_10658.t1,gene_02745.t1,gene_00262.t1,gene_02421.t1,gene_09026.t1,gene_02461.t1,gene_08558.t1,gene_05158.t1,gene_05186.t1,gene_07955.t1,gene_02774.t1,gene_01367.t1,gene_04672.t1,gene_05705.t1,gene_09371.t1,gene_10624.t1,gene_09330.t1,gene_10018.t1,gene_02313.t1,gene_06626.t1,gene_01186.t1,gene_10121.t1,gene_01365.t1,gene_09948.t1,gene_03947.t1,gene_04752.t1,gene_01260.t1,gene_05216.t1,gene_09124.t1,gene_01120.t1,gene_05833.t1,gene_09089.t1,gene_00360.t1,gene_02976.t1,gene_05549.t1,gene_08472.t1,gene_03691.t1,gene_04372.t1,gene_05300.t1,gene_10665.t1,gene_10578.t1,gene_07176.t1,gene_00830.t1,gene_00328.t1, | | integral component of membrane | cellular_component |

**Table S3 Detailed Gene Ontology (GO) classification of protein families in the genome of *P. paneum* OM1 (*Continued*)**

| **GO ID** | **Seq Num** | | **Seq List** | **GO term** | **Category** |
| --- | --- | --- | --- | --- | --- |
| GO:0016021 | 1940 | gene_07206.t1,gene_06385.t1,gene_06042.t1,gene_09398.t1,gene_07044.t1,gene_05137.t1,gene_08252.t1,gene_04773.t1,gene_02504.t1,gene_04280.t1,gene_05387.t1,gene_09661.t1,gene_04456.t1,gene_01672.t1,gene_02641.t1,gene_03263.t1,gene_10643.t1,gene_10282.t1,gene_05271.t1,gene_01572.t1,gene_00717.t1,gene_06987.t1,gene_03693.t1,gene_04494.t1,gene_06357.t1,gene_07440.t1,gene_09216.t1,gene_07817.t1,gene_00629.t1,gene_03298.t1,gene_05509.t1,gene_03577.t1,gene_05596.t1,gene_03422.t1,gene_02172.t1,gene_03437.t1,gene_01748.t1,gene_06355.t1,gene_00886.t1,gene_05135.t1,gene_00870.t1,gene_10418.t1,gene_04017.t1,gene_07720.t1,gene_08151.t1,gene_02214.t1,gene_08880.t1,gene_04544.t1,gene_01818.t1,gene_06410.t1,gene_08803.t1,gene_03948.t1,gene_03820.t1,gene_07413.t1,gene_07259.t1,gene_09458.t1,gene_10641.t1,gene_02392.t1,gene_04814.t1,gene_08206.t1,gene_00672.t1,gene_08729.t1,gene_07633.t1,gene_02196.t1,gene_07675.t1,gene_02296.t1,gene_10435.t1,gene_10190.t1,gene_08425.t1,gene_10661.t1,gene_04622.t1,gene_04112.t1,gene_06578.t1,gene_07511.t1,gene_05294.t1,gene_10673.t1,gene_05997.t1,gene_01103.t1,gene_04031.t1,gene_02131.t1,gene_01693.t1,gene_05553.t1,gene_06502.t1,gene_08847.t1,gene_03365.t1,gene_01823.t1,gene_03593.t1,gene_09248.t1,gene_09808.t1,gene_02658.t1,gene_10249.t1,gene_10059.t1,gene_04222.t1,gene_03923.t1,gene_00327.t1,gene_06398.t1,gene_05604.t1,gene_02907.t1,gene_08866.t1,gene_02221.t1,gene_09967.t1,gene_06851.t1,gene_04349.t1,gene_09482.t1,gene_10362.t1,gene_05032.t1,gene_10132.t1,gene_09348.t1,gene_03636.t1,gene_06199.t1,gene_09943.t1,gene_08615.t1,gene_06539.t1,gene_00730.t1,gene_06590.t1,gene_07858.t1,gene_08461.t1,gene_00745.t1,gene_02928.t1,gene_09772.t1,gene_04922.t1,gene_02646.t1,gene_03725.t1,gene_01708.t1,gene_00607.t1,gene_00758.t1,gene_08681.t1,gene_06843.t1,gene_04628.t1,gene_00778.t1,gene_04115.t1,gene_05193.t1,gene_09172.t1,gene_09343.t1,gene_03250.t1,gene_08189.t1,gene_05653.t1,gene_05494.t1,gene_05823.t1,gene_01144.t1,gene_02543.t1,gene_09403.t1,gene_10497.t1,gene_10615.t1,gene_08496.t1,gene_07089.t1,gene_05144.t1,gene_00179.t1,gene_02541.t1,gene_01191.t1,gene_06352.t1,gene_01159.t1,gene_05978.t1,gene_09573.t1,gene_06518.t1,gene_04768.t1,gene_10475.t1,gene_00975.t1,gene_10554.t1,gene_07043.t1,gene_00285.t1,gene_03354.t1,gene_00188.t1,gene_06324.t1,gene_02025.t1,gene_07504.t1,gene_10021.t1,gene_10442.t1,gene_00637.t1,gene_08129.t1,gene_00377.t1,gene_04273.t1,gene_10631.t1,gene_10564.t1,gene_02655.t1,gene_00292.t1,gene_03669.t1,gene_09670.t1,gene_01291.t1,gene_10013.t1, | | integral component of membrane | cellular_component |

**Table S3 Detailed Gene Ontology (GO) classification of protein families in the genome of *P. paneum* OM1 (*Continued*)**

| **GO ID** | **Seq Num** | | **Seq List** | **GO term** | **Category** |
| --- | --- | --- | --- | --- | --- |
| GO:0016021 | 1940 | gene_10461.t1,gene_07384.t1,gene_07470.t1,gene_04379.t1,gene_09539.t1,gene_00783.t1,gene_09010.t1,gene_05486.t1,gene_00769.t1,gene_10410.t1,gene_09200.t1,gene_05491.t1,gene_02784.t1,gene_10339.t1,gene_07390.t1,gene_07247.t1,gene_08415.t1,gene_02385.t1,gene_04369.t1,gene_09880.t1,gene_08791.t1,gene_05583.t1,gene_00624.t1,gene_05543.t1,gene_06176.t1,gene_02940.t1,gene_04297.t1,gene_01470.t1,gene_04447.t1,gene_01569.t1,gene_04417.t1,gene_07877.t1,gene_02233.t1,gene_08211.t1,gene_07954.t1,gene_06852.t1,gene_02673.t1,gene_00437.t1,gene_05603.t1,gene_07196.t1,gene_07562.t1,gene_04308.t1,gene_08325.t1,gene_08832.t1,gene_00185.t1,gene_03380.t1,gene_03135.t1,gene_07268.t1,gene_00756.t1,gene_03516.t1,gene_01118.t1,gene_01006.t1,gene_03918.t1,gene_04144.t1,gene_02415.t1,gene_04385.t1,gene_07068.t1,gene_01931.t1,gene_09904.t1,gene_06869.t1,gene_10378.t1,gene_02109.t1,gene_07016.t1,gene_04110.t1,gene_06043.t1,gene_00167.t1,gene_04711.t1,gene_09463.t1,gene_05009.t1,gene_10391.t1 | | integral component of membrane | cellular_component |
| GO:0016020 | 60 | gene_02601.t1,gene_02859.t1,gene_00268.t1,gene_02046.t1,gene_05393.t1,gene_07871.t1,gene_04060.t1,gene_03232.t1,gene_05369.t1,gene_10310.t1,gene_08045.t1,gene_08623.t1,gene_03601.t1,gene_08395.t1,gene_10269.t1,gene_10480.t1,gene_03932.t1,gene_10098.t1,gene_04188.t1,gene_04152.t1,gene_05672.t1,gene_01271.t1,gene_05913.t1,gene_06068.t1,gene_08160.t1,gene_02853.t1,gene_02045.t1,gene_09945.t1,gene_03881.t1,gene_00375.t1,gene_08417.t1,gene_08332.t1,gene_03259.t1,gene_04196.t1,gene_07978.t1,gene_06526.t1,gene_00367.t1,gene_02690.t1,gene_01020.t1,gene_06399.t1,gene_07909.t1,gene_07605.t1,gene_08040.t1,gene_02165.t1,gene_02817.t1,gene_08680.t1,gene_02861.t1,gene_08398.t1,gene_07477.t1,gene_03192.t1,gene_06333.t1,gene_07456.t1,gene_03121.t1,gene_09873.t1,gene_05146.t1,gene_09555.t1,gene_07272.t1,gene_06364.t1,gene_02125.t1,gene_03925.t1 | | membrane | cellular_component |
| GO:1990071 | 2 | gene_05460.t1,gene_08887.t1 | | TRAPPII protein complex | cellular_component |
| GO:0043231 | 5 | gene_00624.t1,gene_06125.t1,gene_00873.t1,gene_10607.t1,gene_04096.t1 | | intracellular membrane-bounded organelle | cellular_component |
| GO:0034066 | 1 | gene_05393.t1 | | Ric1-Rgp1 guanyl-nucleotide exchange factor complex | cellular_component |
| GO:0005643 | 15 | gene_01652.t1,gene_05468.t1,gene_01229.t1,gene_06461.t1,gene_09280.t1,gene_01090.t1,gene_10042.t1,gene_08865.t1,gene_08499.t1,gene_09312.t1,gene_08808.t1,gene_09198.t1,gene_05611.t1,gene_00349.t1,gene_07017.t1 | | nuclear pore | cellular_component |
| GO:0009316 | 1 | gene_07021.t1 | | 3-isopropylmalate dehydratase complex | cellular_component |
| GO:0031305 | 4 | gene_05977.t1,gene_04131.t1,gene_02006.t1,gene_09298.t1 | | integral component of mitochondrial inner membrane | cellular_component |

**Table S3 Detailed Gene Ontology (GO) classification of protein families in the genome of *P. paneum* OM1 (*Continued*)**

| **GO ID** | **Seq Num** | | **Seq List** | **GO term** | **Category** |
| --- | --- | --- | --- | --- | --- |
| GO:0031307 | 3 | gene_04067.t1,gene_03755.t1,gene_06112.t1 | | integral component of mitochondrial outer membrane | cellular_component |
| GO:0002189 | 2 | gene_10016.t1,gene_09154.t1 | | ribose phosphate diphosphokinase complex | cellular_component |
| GO:0098826 | 1 | gene_03397.t1 | | endoplasmic reticulum tubular network membrane | cellular_component |
| GO:0089701 | 1 | gene_02268.t1 | | U2AF complex | cellular_component |
| GO:0000922 | 6 | gene_06203.t1,gene_08722.t1,gene_07037.t1,gene_10487.t1,gene_05691.t1,gene_08161.t1 | | spindle pole | cellular_component |
| GO:0032153 | 1 | gene_09686.t1 | | cell division site | cellular_component |
| GO:0033551 | 1 | gene_01264.t1 | | monopolin complex | cellular_component |
| GO:0033557 | 2 | gene_07889.t1,gene_02787.t1 | | Slx1-Slx4 complex | cellular_component |
| GO:0016272 | 6 | gene_10136.t1,gene_05558.t1,gene_01918.t1,gene_01533.t1,gene_03193.t1,gene_03178.t1 | | prefoldin complex | cellular_component |
| GO:0043229 | 7 | gene_03892.t1,gene_04224.t1,gene_04547.t1,gene_09728.t1,gene_07602.t1,gene_09992.t1,gene_02322.t1 | | intracellular organelle | cellular_component |
| GO:0043227 | 1 | gene_09833.t1 | | membrane-bounded organelle | cellular_component |
| GO:0043226 | 1 | gene_05146.t1 | | organelle | cellular_component |
| GO:0016471 | 1 | gene_08358.t1 | | vacuolar proton-transporting V-type ATPase complex | cellular_component |
| GO:0110165 | 27 | gene_05853.t1,gene_05964.t1,gene_06273.t1,gene_02888.t1,gene_05327.t1,gene_02917.t1,gene_02613.t1,gene_03186.t1,gene_09239.t1,gene_07801.t1,gene_04294.t1,gene_07324.t1,gene_10617.t1,gene_00303.t1,gene_09928.t1,gene_00269.t1,gene_03757.t1,gene_03071.t1,gene_08053.t1,gene_05377.t1,gene_05666.t1,gene_08075.t1,gene_02694.t1,gene_06024.t1,gene_08363.t1,gene_05956.t1,gene_07387.t1 | | cellular anatomical entity | cellular_component |
| GO:0097255 | 2 | gene_00682.t1,gene_10008.t1 | | R2TP complex | cellular_component |
| GO:0033178 | 1 | gene_00893.t1 | | proton-transporting two-sector ATPase complex, catalytic domain | cellular_component |
| GO:0035658 | 1 | gene_02436.t1 | | Mon1-Ccz1 complex | cellular_component |
| GO:0031932 | 5 | gene_07621.t1,gene_10315.t1,gene_00561.t1,gene_04143.t1,gene_05323.t1 | | TORC2 complex | cellular_component |
| GO:0005637 | 2 | gene_03593.t1,gene_02440.t1 | | nuclear inner membrane | cellular_component |

**Table S3 Detailed Gene Ontology (GO) classification of protein families in the genome of *P. paneum* OM1 (*Continued*)**

| **GO ID** | **Seq Num** | | **Seq List** | **GO term** | **Category** |
| --- | --- | --- | --- | --- | --- |
| GO:0005634 | 837 | gene_09759.t1,gene_06503.t1,gene_07620.t1,gene_05739.t1,gene_09809.t1,gene_10558.t1,gene_08174.t1,gene_07038.t1,gene_02699.t1,gene_02002.t1,gene_06706.t1,gene_08500.t1,gene_07165.t1,gene_08595.t1,gene_10265.t1,gene_09457.t1,gene_04873.t1,gene_02977.t1,gene_01958.t1,gene_03228.t1,gene_06172.t1,gene_02023.t1,gene_05976.t1,gene_01625.t1,gene_10492.t1,gene_00353.t1,gene_01065.t1,gene_02178.t1,gene_10022.t1,gene_05425.t1,gene_09939.t1,gene_04045.t1,gene_07960.t1,gene_07736.t1,gene_03544.t1,gene_06913.t1,gene_06394.t1,gene_05277.t1,gene_07673.t1,gene_04251.t1,gene_07105.t1,gene_10319.t1,gene_00562.t1,gene_02847.t1,gene_02232.t1,gene_08694.t1,gene_06819.t1,gene_09930.t1,gene_08746.t1,gene_05717.t1,gene_00595.t1,gene_06909.t1,gene_09549.t1,gene_08063.t1,gene_04594.t1,gene_06856.t1,gene_07003.t1,gene_06252.t1,gene_03740.t1,gene_07166.t1,gene_00052.t1,gene_03342.t1,gene_04524.t1,gene_04970.t1,gene_05168.t1,gene_07316.t1,gene_01394.t1,gene_06864.t1,gene_10351.t1,gene_09767.t1,gene_04933.t1,gene_09164.t1,gene_10494.t1,gene_01025.t1,gene_05527.t1,gene_09993.t1,gene_01864.t1,gene_06392.t1,gene_09338.t1,gene_09546.t1,gene_04014.t1,gene_01922.t1,gene_03104.t1,gene_06866.t1,gene_06327.t1,gene_04656.t1,gene_02107.t1,gene_00675.t1,gene_05883.t1,gene_01856.t1,gene_02187.t1,gene_08645.t1,gene_02334.t1,gene_04473.t1,gene_05445.t1,gene_06230.t1,gene_09277.t1,gene_05786.t1,gene_00614.t1,gene_06132.t1,gene_00689.t1,gene_09720.t1,gene_05962.t1,gene_02788.t1,gene_08006.t1,gene_00822.t1,gene_00412.t1,gene_04263.t1,gene_02773.t1,gene_06488.t1,gene_02151.t1,gene_05971.t1,gene_04676.t1,gene_07356.t1,gene_05704.t1,gene_01695.t1,gene_07343.t1,gene_03054.t1,gene_02882.t1,gene_05624.t1,gene_05428.t1,gene_04732.t1,gene_05913.t1,gene_03237.t1,gene_08560.t1,gene_08795.t1,gene_00904.t1,gene_09428.t1,gene_05383.t1,gene_10333.t1,gene_10083.t1,gene_01688.t1,gene_00422.t1,gene_07064.t1,gene_05810.t1,gene_03509.t1,gene_03984.t1,gene_04445.t1,gene_00906.t1,gene_10576.t1,gene_00882.t1,gene_04579.t1,gene_08288.t1,gene_00652.t1,gene_09646.t1,gene_09578.t1,gene_05862.t1,gene_08594.t1,gene_03105.t1,gene_01857.t1,gene_08034.t1,gene_00268.t1,gene_08703.t1,gene_04693.t1,gene_05639.t1,gene_03599.t1,gene_03822.t1,gene_04826.t1,gene_07229.t1,gene_06735.t1,gene_02068.t1,gene_05458.t1,gene_07612.t1,gene_02027.t1,gene_02321.t1,gene_05064.t1,gene_06606.t1,gene_08479.t1,gene_09361.t1,gene_06675.t1,gene_05087.t1,gene_02790.t1,gene_05910.t1,gene_07299.t1,gene_04448.t1,gene_02661.t1,gene_00770.t1,gene_06449.t1,gene_03304.t1,gene_00362.t1, | | nucleus | cellular_component |

**Table S3 Detailed Gene Ontology (GO) classification of protein families in the genome of *P. paneum* OM1 (*Continued*)**

| **GO ID** | **Seq Num** | | **Seq List** | **GO term** | **Category** |
| --- | --- | --- | --- | --- | --- |
| GO:0005634 | 837 | gene_02253.t1,gene_03842.t1,gene_04795.t1,gene_06456.t1,gene_09944.t1,gene_00274.t1,gene_07840.t1,gene_07250.t1,gene_01333.t1,gene_07241.t1,gene_03981.t1,gene_00059.t1,gene_05907.t1,gene_07382.t1,gene_06223.t1,gene_07333.t1,gene_04695.t1,gene_09703.t1,gene_02367.t1,gene_06637.t1,gene_09406.t1,gene_03210.t1,gene_00656.t1,gene_00580.t1,gene_10104.t1,gene_10164.t1,gene_03694.t1,gene_03101.t1,gene_00286.t1,gene_06585.t1,gene_05455.t1,gene_01336.t1,gene_00496.t1,gene_00883.t1,gene_01987.t1,gene_03707.t1,gene_05373.t1,gene_09375.t1,gene_08824.t1,gene_08608.t1,gene_02781.t1,gene_08521.t1,gene_09585.t1,gene_02297.t1,gene_05808.t1,gene_07377.t1,gene_07128.t1,gene_09536.t1,gene_00556.t1,gene_04582.t1,gene_01305.t1,gene_04840.t1,gene_06020.t1,gene_01948.t1,gene_03579.t1,gene_05556.t1,gene_06963.t1,gene_07290.t1,gene_07613.t1,gene_01145.t1,gene_06978.t1,gene_05459.t1,gene_05273.t1,gene_10281.t1,gene_01005.t1,gene_02451.t1,gene_08218.t1,gene_06934.t1,gene_00982.t1,gene_05814.t1,gene_10407.t1,gene_09590.t1,gene_04918.t1,gene_02034.t1,gene_02652.t1,gene_04182.t1,gene_09706.t1,gene_01212.t1,gene_10663.t1,gene_01774.t1,gene_00817.t1,gene_01718.t1,gene_04937.t1,gene_01433.t1,gene_10557.t1,gene_05897.t1,gene_08282.t1,gene_00587.t1,gene_06852.t1,gene_02605.t1,gene_07932.t1,gene_09813.t1,gene_01352.t1,gene_01887.t1,gene_05636.t1,gene_02617.t1,gene_04013.t1,gene_06732.t1,gene_06524.t1,gene_05627.t1,gene_01650.t1,gene_08214.t1,gene_08477.t1,gene_04238.t1,gene_09265.t1,gene_06584.t1,gene_02809.t1,gene_06795.t1,gene_10553.t1,gene_05992.t1,gene_07321.t1,gene_04208.t1,gene_09878.t1,gene_01937.t1,gene_02318.t1,gene_01345.t1,gene_04028.t1,gene_05141.t1,gene_09748.t1,gene_08833.t1,gene_07955.t1,gene_01705.t1,gene_05517.t1,gene_07742.t1,gene_04179.t1,gene_00138.t1,gene_04158.t1,gene_03595.t1,gene_09756.t1,gene_03799.t1,gene_05348.t1,gene_10151.t1,gene_10666.t1,gene_06114.t1,gene_08071.t1,gene_08324.t1,gene_00356.t1,gene_03831.t1,gene_06309.t1,gene_02776.t1,gene_04398.t1,gene_00986.t1,gene_05568.t1,gene_03650.t1,gene_09824.t1,gene_07353.t1,gene_04621.t1,gene_00046.t1,gene_06622.t1,gene_10279.t1,gene_00048.t1,gene_04105.t1,gene_02607.t1,gene_07537.t1,gene_01756.t1,gene_05595.t1,gene_02835.t1,gene_08591.t1,gene_09572.t1,gene_09182.t1,gene_08569.t1,gene_07164.t1,gene_02050.t1,gene_05469.t1,gene_08699.t1,gene_09540.t1,gene_09923.t1,gene_09339.t1,gene_04137.t1,gene_02512.t1,gene_00803.t1,gene_03638.t1,gene_07403.t1,gene_01529.t1,gene_06740.t1,gene_08366.t1,gene_06031.t1,gene_09561.t1,gene_03785.t1,gene_09879.t1, | | nucleus | cellular_component |

**Table S3 Detailed Gene Ontology (GO) classification of protein families in the genome of *P. paneum* OM1 (*Continued*)**

| **GO ID** | **Seq Num** | | **Seq List** | **GO term** | **Category** |
| --- | --- | --- | --- | --- | --- |
| GO:0005634 | 837 | gene_01621.t1,gene_09330.t1,gene_00399.t1,gene_07320.t1,gene_07785.t1,gene_02242.t1,gene_05559.t1,gene_05725.t1,gene_10229.t1,gene_06009.t1,gene_09757.t1,gene_05457.t1,gene_09025.t1,gene_06823.t1,gene_08877.t1,gene_03642.t1,gene_00408.t1,gene_09563.t1,gene_04307.t1,gene_06040.t1,gene_07791.t1,gene_10355.t1,gene_09822.t1,gene_09299.t1,gene_01014.t1,gene_08155.t1,gene_07311.t1,gene_10172.t1,gene_05721.t1,gene_01618.t1,gene_02119.t1,gene_07759.t1,gene_03870.t1,gene_03107.t1,gene_02995.t1,gene_05066.t1,gene_04902.t1,gene_03748.t1,gene_10570.t1,gene_08299.t1,gene_09979.t1,gene_04435.t1,gene_07707.t1,gene_05151.t1,gene_00018.t1,gene_01954.t1,gene_06679.t1,gene_10649.t1,gene_06339.t1,gene_03900.t1,gene_02220.t1,gene_05741.t1,gene_09601.t1,gene_02526.t1,gene_04241.t1,gene_09568.t1,gene_03130.t1,gene_04257.t1,gene_02703.t1,gene_05301.t1,gene_03864.t1,gene_03018.t1,gene_02544.t1,gene_02328.t1,gene_05153.t1,gene_07260.t1,gene_07085.t1,gene_02778.t1,gene_01660.t1,gene_00330.t1,gene_03062.t1,gene_09192.t1,gene_06059.t1,gene_10019.t1,gene_01692.t1,gene_05311.t1,gene_09733.t1,gene_06936.t1,gene_04976.t1,gene_01712.t1,gene_09542.t1,gene_02170.t1,gene_10058.t1,gene_03295.t1,gene_07730.t1,gene_09848.t1,gene_08074.t1,gene_10254.t1,gene_08254.t1,gene_07525.t1,gene_01390.t1,gene_09126.t1,gene_03047.t1,gene_05121.t1,gene_08388.t1,gene_09460.t1,gene_05664.t1,gene_07677.t1,gene_03610.t1,gene_04176.t1,gene_05796.t1,gene_04979.t1,gene_08753.t1,gene_07168.t1,gene_10543.t1,gene_03606.t1,gene_02486.t1,gene_00257.t1,gene_00959.t1,gene_03712.t1,gene_00308.t1,gene_02317.t1,gene_00564.t1,gene_07726.t1,gene_03800.t1,gene_06709.t1,gene_00505.t1,gene_09865.t1,gene_01527.t1,gene_02375.t1,gene_08484.t1,gene_05950.t1,gene_01223.t1,gene_03132.t1,gene_10047.t1,gene_07693.t1,gene_02356.t1,gene_00911.t1,gene_09702.t1,gene_06255.t1,gene_07827.t1,gene_06171.t1,gene_05685.t1,gene_01715.t1,gene_00538.t1,gene_05884.t1,gene_00363.t1,gene_03427.t1,gene_06102.t1,gene_09867.t1,gene_02992.t1,gene_08135.t1,gene_04004.t1,gene_07628.t1,gene_01982.t1,gene_04627.t1,gene_05640.t1,gene_10205.t1,gene_07635.t1,gene_08083.t1,gene_02523.t1,gene_05154.t1,gene_08626.t1,gene_07992.t1,gene_07948.t1,gene_06089.t1,gene_08550.t1,gene_04830.t1,gene_01535.t1,gene_03812.t1,gene_04854.t1,gene_01135.t1,gene_00640.t1,gene_07583.t1,gene_08663.t1,gene_02387.t1,gene_01819.t1,gene_09814.t1,gene_04669.t1,gene_09957.t1,gene_01911.t1,gene_02668.t1,gene_06517.t1,gene_02916.t1,gene_04048.t1,gene_10137.t1,gene_09235.t1,gene_08947.t1,gene_09656.t1,gene_04128.t1, | | nucleus | cellular_component |

**Table S3 Detailed Gene Ontology (GO) classification of protein families in the genome of *P. paneum* OM1 (*Continued*)**

| **GO ID** | **Seq Num** | | **Seq List** | **GO term** | **Category** |
| --- | --- | --- | --- | --- | --- |
| GO:0005634 | 837 | gene_04459.t1,gene_09635.t1,gene_02529.t1,gene_05747.t1,gene_09485.t1,gene_10188.t1,gene_09370.t1,gene_06885.t1,gene_01742.t1,gene_06249.t1,gene_00256.t1,gene_02757.t1,gene_05547.t1,gene_03994.t1,gene_03655.t1,gene_04313.t1,gene_07010.t1,gene_08483.t1,gene_03979.t1,gene_10374.t1,gene_06258.t1,gene_00732.t1,gene_09036.t1,gene_06291.t1,gene_02554.t1,gene_06417.t1,gene_01262.t1,gene_08890.t1,gene_02946.t1,gene_00747.t1,gene_01321.t1,gene_09131.t1,gene_06377.t1,gene_01359.t1,gene_07284.t1,gene_00847.t1,gene_03869.t1,gene_05152.t1,gene_06457.t1,gene_09266.t1,gene_07670.t1,gene_05811.t1,gene_03248.t1,gene_03741.t1,gene_01095.t1,gene_06330.t1,gene_04645.t1,gene_01156.t1,gene_06095.t1,gene_08280.t1,gene_03747.t1,gene_05070.t1,gene_01310.t1,gene_01377.t1,gene_04922.t1,gene_01134.t1,gene_01226.t1,gene_01708.t1,gene_04946.t1,gene_06766.t1,gene_06073.t1,gene_05932.t1,gene_07851.t1,gene_05015.t1,gene_02110.t1,gene_10003.t1,gene_03163.t1,gene_08488.t1,gene_10056.t1,gene_06870.t1,gene_06365.t1,gene_03123.t1,gene_03786.t1,gene_09915.t1,gene_03450.t1,gene_08300.t1,gene_09935.t1,gene_04049.t1,gene_07890.t1,gene_06145.t1,gene_03596.t1,gene_08513.t1,gene_03581.t1,gene_05048.t1,gene_09412.t1,gene_01714.t1,gene_00968.t1,gene_03118.t1,gene_09261.t1,gene_08966.t1,gene_09195.t1,gene_07755.t1,gene_00727.t1,gene_01651.t1,gene_03682.t1,gene_01942.t1,gene_10237.t1,gene_09038.t1,gene_04378.t1,gene_06720.t1,gene_07623.t1,gene_07271.t1,gene_04651.t1,gene_01679.t1,gene_04706.t1,gene_00182.t1,gene_01524.t1,gene_06395.t1,gene_09652.t1,gene_08345.t1,gene_02241.t1,gene_09268.t1,gene_02228.t1,gene_00867.t1,gene_03513.t1,gene_07282.t1,gene_04650.t1,gene_00908.t1,gene_08055.t1,gene_09697.t1,gene_10433.t1,gene_03447.t1,gene_02098.t1,gene_06719.t1,gene_09584.t1,gene_05689.t1,gene_07640.t1,gene_08029.t1,gene_02808.t1,gene_07040.t1,gene_03050.t1,gene_09712.t1,gene_05943.t1,gene_06532.t1,gene_02751.t1,gene_07667.t1,gene_02657.t1,gene_01153.t1,gene_08441.t1,gene_03784.t1,gene_01809.t1,gene_08041.t1,gene_06446.t1,gene_03234.t1,gene_02029.t1,gene_08291.t1,gene_06088.t1,gene_05540.t1,gene_03408.t1,gene_08985.t1,gene_03366.t1,gene_05998.t1,gene_05206.t1,gene_06949.t1,gene_07683.t1,gene_04022.t1,gene_09220.t1,gene_04081.t1,gene_02948.t1,gene_06614.t1,gene_08341.t1,gene_02854.t1,gene_06402.t1,gene_07750.t1,gene_05849.t1,gene_03455.t1,gene_10255.t1,gene_01612.t1,gene_10167.t1,gene_07639.t1,gene_01003.t1,gene_08841.t1,gene_05736.t1,gene_05474.t1,gene_09537.t1,gene_06697.t1,gene_07088.t1,gene_06266.t1,gene_07355.t1,gene_04914.t1, | | nucleus | cellular_component |

**Table S3 Detailed Gene Ontology (GO) classification of protein families in the genome of *P. paneum* OM1 (*Continued*)**

| **GO ID** | **Seq Num** | | **Seq List** | **GO term** | **Category** |
| --- | --- | --- | --- | --- | --- |
| GO:0005634 | 837 | gene_02372.t1,gene_06696.t1,gene_06972.t1,gene_05228.t1,gene_06826.t1,gene_04481.t1,gene_05239.t1,gene_07217.t1,gene_07474.t1,gene_10051.t1,gene_02862.t1,gene_10211.t1,gene_04983.t1,gene_07532.t1,gene_04730.t1,gene_02385.t1,gene_01481.t1,gene_00395.t1,gene_04084.t1,gene_03770.t1,gene_05402.t1,gene_02580.t1,gene_10509.t1,gene_05970.t1,gene_01933.t1,gene_01512.t1,gene_02786.t1,gene_08148.t1,gene_01222.t1,gene_03761.t1,gene_10449.t1,gene_04515.t1,gene_02282.t1,gene_03463.t1,gene_08700.t1,gene_03863.t1,gene_02874.t1,gene_09193.t1,gene_05299.t1,gene_07506.t1,gene_10629.t1,gene_02910.t1,gene_03763.t1,gene_00921.t1,gene_09262.t1,gene_10160.t1,gene_08139.t1,gene_02042.t1,gene_06023.t1,gene_03476.t1,gene_06515.t1,gene_01498.t1,gene_07548.t1,gene_06225.t1,gene_07202.t1,gene_02608.t1,gene_05588.t1,gene_02502.t1,gene_05665.t1,gene_01436.t1,gene_04631.t1,gene_01613.t1,gene_10614.t1,gene_04903.t1,gene_04347.t1,gene_03884.t1,gene_09897.t1,gene_09526.t1,gene_07352.t1,gene_04254.t1,gene_03935.t1,gene_02207.t1,gene_09969.t1,gene_07354.t1,gene_08867.t1,gene_03311.t1,gene_09035.t1,gene_08344.t1,gene_02086.t1,gene_01730.t1,gene_05898.t1,gene_07246.t1,gene_02698.t1,gene_06672.t1,gene_03607.t1,gene_07054.t1,gene_10498.t1,gene_08262.t1,gene_01875.t1,gene_02270.t1,gene_04234.t1,gene_04041.t1,gene_05805.t1,gene_06653.t1,gene_02230.t1,gene_08062.t1,gene_03529.t1,gene_02677.t1,gene_01998.t1,gene_02495.t1,gene_05080.t1,gene_10216.t1,gene_00891.t1,gene_00229.t1,gene_01530.t1,gene_05972.t1,gene_00833.t1,gene_10602.t1,gene_00634.t1,gene_05082.t1,gene_00992.t1,gene_09619.t1,gene_02730.t1,gene_02783.t1,gene_04974.t1,gene_08638.t1,gene_00812.t1 | | nucleus | cellular_component |
| GO:0005635 | 1 | gene_10468.t1 | | nuclear envelope | cellular_component |
| GO:0009326 | 1 | gene_09683.t1 | | formate dehydrogenase complex | cellular_component |
| GO:0000214 | 3 | gene_04404.t1,gene_05909.t1,gene_02939.t1 | | tRNA-intron endonuclease complex | cellular_component |
| GO:0061617 | 3 | gene_08793.t1,gene_05236.t1,gene_03603.t1 | | MICOS complex | cellular_component |
| GO:0000407 | 4 | gene_04192.t1,gene_06906.t1,gene_08294.t1,gene_03673.t1 | | phagophore assembly site | cellular_component |
| GO:0005742 | 1 | gene_06545.t1 | | mitochondrial outer membrane translocase complex | cellular_component |

**Table S3 Detailed Gene Ontology (GO) classification of protein families in the genome of *P. paneum* OM1 (*Continued*)**

| **GO ID** | **Seq Num** | | **Seq List** | **GO term** | **Category** |
| --- | --- | --- | --- | --- | --- |
| GO:0005743 | 99 | gene_00014.t1,gene_06335.t1,gene_09037.t1,gene_08646.t1,gene_00351.t1,gene_00789.t1,gene_05086.t1,gene_00316.t1,gene_01994.t1,gene_07616.t1,gene_07137.t1,gene_07625.t1,gene_08864.t1,gene_04249.t1,gene_00583.t1,gene_08412.t1,gene_06363.t1,gene_06931.t1,gene_09108.t1,gene_09293.t1,gene_10493.t1,gene_09356.t1,gene_10203.t1,gene_10133.t1,gene_01021.t1,gene_01412.t1,gene_10025.t1,gene_04538.t1,gene_00792.t1,gene_09825.t1,gene_06034.t1,gene_01215.t1,gene_05476.t1,gene_01057.t1,gene_01243.t1,gene_06206.t1,gene_00870.t1,gene_07342.t1,gene_00964.t1,gene_08196.t1,gene_05518.t1,gene_06997.t1,gene_09821.t1,gene_07097.t1,gene_07113.t1,gene_07345.t1,gene_04031.t1,gene_01367.t1,gene_07247.t1,gene_06331.t1,gene_07351.t1,gene_09613.t1,gene_03201.t1,gene_10039.t1,gene_08818.t1,gene_02773.t1,gene_01933.t1,gene_00788.t1,gene_04447.t1,gene_09143.t1,gene_09260.t1,gene_02967.t1,gene_08431.t1,gene_04542.t1,gene_03691.t1,gene_07499.t1,gene_01713.t1,gene_00118.t1,gene_08052.t1,gene_07330.t1,gene_08217.t1,gene_07206.t1,gene_01409.t1,gene_03980.t1,gene_08413.t1,gene_04080.t1,gene_01230.t1,gene_03782.t1,gene_07239.t1,gene_01197.t1,gene_02504.t1,gene_05068.t1,gene_02370.t1,gene_02936.t1,gene_04277.t1,gene_10382.t1,gene_00609.t1,gene_01931.t1,gene_05391.t1,gene_01635.t1,gene_02201.t1,gene_00749.t1,gene_05326.t1,gene_08961.t1,gene_00717.t1,gene_09057.t1,gene_00091.t1,gene_06328.t1,gene_02120.t1 | | mitochondrial inner membrane | cellular_component |
| GO:0005741 | 10 | gene_08164.t1,gene_07093.t1,gene_06489.t1,gene_08866.t1,gene_06104.t1,gene_00322.t1,gene_09709.t1,gene_02644.t1,gene_03586.t1,gene_08669.t1 | | mitochondrial outer membrane | cellular_component |
| GO:0005747 | 2 | gene_09270.t1,gene_06779.t1 | | mitochondrial respiratory chain complex I | cellular_component |
| GO:0005744 | 3 | gene_06037.t1,gene_00476.t1,gene_02807.t1 | | TIM23 mitochondrial import inner membrane translocase complex | cellular_component |
| GO:0000408 | 1 | gene_09601.t1 | | EKC/KEOPS complex | cellular_component |
| GO:0031201 | 1 | gene_04059.t1 | | SNARE complex | cellular_component |
| GO:0070824 | 1 | gene_01639.t1 | | SHREC complex | cellular_component |
| GO:0033573 | 1 | gene_05743.t1 | | high-affinity iron permease complex | cellular_component |
| GO:1990334 | 1 | gene_04154.t1 | | Bfa1-Bub2 complex | cellular_component |
| GO:0008278 | 3 | gene_07202.t1,gene_09867.t1,gene_00812.t1 | | cohesin complex | cellular_component |
| GO:0032300 | 5 | gene_09396.t1,gene_03237.t1,gene_00205.t1,gene_05849.t1,gene_03576.t1 | | mismatch repair complex | cellular_component |
| GO:0071986 | 1 | gene_03887.t1 | | Ragulator complex | cellular_component |

**Table S3 Detailed Gene Ontology (GO) classification of protein families in the genome of *P. paneum* OM1 (*Continued*)**

| **GO ID** | **Seq Num** | | **Seq List** | **GO term** | **Category** |
| --- | --- | --- | --- | --- | --- |
| GO:0030896 | 2 | gene_09512.t1,gene_00573.t1 | | checkpoint clamp complex | cellular_component |
| GO:0046540 | 5 | gene_05450.t1,gene_08685.t1,gene_02231.t1,gene_06070.t1,gene_02996.t1 | | U4/U6 x U5 tri-snRNP complex | cellular_component |
| GO:0048500 | 1 | gene_05782.t1 | | signal recognition particle | cellular_component |
| GO:0015934 | 7 | gene_01094.t1,gene_07081.t1,gene_02167.t1,gene_02536.t1,gene_03987.t1,gene_03269.t1,gene_05166.t1 | | large ribosomal subunit | cellular_component |
| GO:0015935 | 10 | gene_06639.t1,gene_00520.t1,gene_02965.t1,gene_04098.t1,gene_04719.t1,gene_08396.t1,gene_06717.t1,gene_10532.t1,gene_06874.t1,gene_02865.t1 | | small ribosomal subunit | cellular_component |
| GO:0043625 | 1 | gene_06340.t1 | | delta DNA polymerase complex | cellular_component |
| GO:0033167 | 1 | gene_05887.t1 | | ARC complex | cellular_component |
| GO:0009331 | 2 | gene_00708.t1,gene_05158.t1 | | glycerol-3-phosphate dehydrogenase complex | cellular_component |
| GO:0000262 | 1 | gene_00455.t1 | | mitochondrial chromosome | cellular_component |
| GO:0000228 | 2 | gene_06320.t1,gene_09322.t1 | | nuclear chromosome | cellular_component |
| GO:0005751 | 5 | gene_00354.t1,gene_07269.t1,gene_02781.t1,gene_08159.t1,gene_08418.t1 | | mitochondrial respiratory chain complex IV | cellular_component |
| GO:0005750 | 4 | gene_10111.t1,gene_00585.t1,gene_08819.t1,gene_03982.t1 | | mitochondrial respiratory chain complex III | cellular_component |
| GO:0031213 | 1 | gene_10140.t1 | | RSF complex | cellular_component |
| GO:0022627 | 2 | gene_09278.t1,gene_09004.t1 | | cytosolic small ribosomal subunit | cellular_component |
| GO:0022625 | 5 | gene_01160.t1,gene_10484.t1,gene_05521.t1,gene_08101.t1,gene_00519.t1 | | cytosolic large ribosomal subunit | cellular_component |
| GO:0070939 | 1 | gene_05676.t1 | | Dsl1/NZR complex | cellular_component |
| GO:0044322 | 1 | gene_08332.t1 | | endoplasmic reticulum quality control compartment | cellular_component |
| GO:0043529 | 1 | gene_09348.t1 | | GET complex | cellular_component |
| GO:0070449 | 1 | gene_01140.t1 | | elongin complex | cellular_component |
| GO:0030880 | 1 | gene_07165.t1 | | RNA polymerase complex | cellular_component |
| GO:0030956 | 2 | gene_02324.t1,gene_05707.t1 | | glutamyl-tRNA(Gln) amidotransferase complex | cellular_component |
| GO:0044666 | 1 | gene_04242.t1 | | MLL3/4 complex | cellular_component |
| GO:0005615 | 3 | gene_03322.t1,gene_00430.t1,gene_07700.t1 | | extracellular space | cellular_component |
| GO:0005965 | 1 | gene_04040.t1 | | protein farnesyltransferase complex | cellular_component |
| GO:0005968 | 2 | gene_09996.t1,gene_08511.t1 | | Rab-protein geranylgeranyltransferase complex | cellular_component |
| GO:0000275 | 1 | gene_01754.t1 | | mitochondrial proton-transporting ATP synthase complex, catalytic sector F(1) | cellular_component |

**Table S3 Detailed Gene Ontology (GO) classification of protein families in the genome of *P. paneum* OM1 (*Continued*)**

| **GO ID** | **Seq Num** | | **Seq List** | **GO term** | **Category** |
| --- | --- | --- | --- | --- | --- |
| GO:0000276 | 6 | gene_03015.t1,gene_00267.t1,gene_09826.t1,gene_09484.t1,gene_05980.t1,gene_06648.t1 | | mitochondrial proton-transporting ATP synthase complex, coupling factor F(o) | cellular_component |
| GO:0005960 | 1 | gene_03285.t1 | | glycine cleavage complex | cellular_component |
| GO:0032156 | 4 | gene_04255.t1,gene_07936.t1,gene_08232.t1,gene_05165.t1 | | septin cytoskeleton | cellular_component |
| GO:0030532 | 1 | gene_08528.t1 | | small nuclear ribonucleoprotein complex | cellular_component |
| GO:0097344 | 1 | gene_00904.t1 | | Rix1 complex | cellular_component |
| GO:0005760 | 1 | gene_06076.t1 | | gamma DNA polymerase complex | cellular_component |
| GO:0005761 | 1 | gene_07006.t1 | | mitochondrial ribosome | cellular_component |
| GO:0005762 | 4 | gene_04425.t1,gene_02843.t1,gene_10426.t1,gene_03497.t1 | | mitochondrial large ribosomal subunit | cellular_component |
| GO:0005763 | 1 | gene_00365.t1 | | mitochondrial small ribosomal subunit | cellular_component |
| GO:0005768 | 3 | gene_08574.t1,gene_03580.t1,gene_09100.t1 | | endosome | cellular_component |
| GO:0031262 | 3 | gene_05897.t1,gene_05168.t1,gene_08632.t1 | | Ndc80 complex | cellular_component |
| GO:0031261 | 6 | gene_00515.t1,gene_01710.t1,gene_01540.t1,gene_07862.t1,gene_08245.t1,gene_09071.t1 | | DNA replication preinitiation complex | cellular_component |
| GO:0031461 | 2 | gene_08525.t1,gene_09768.t1 | | cullin-RING ubiquitin ligase complex | cellular_component |
| GO:0000015 | 2 | gene_00524.t1,gene_02419.t1 | | phosphopyruvate hydratase complex | cellular_component |
| GO:0008250 | 3 | gene_02904.t1,gene_01531.t1,gene_09861.t1 | | oligosaccharyltransferase complex | cellular_component |
| GO:0070971 | 1 | gene_09511.t1 | | endoplasmic reticulum exit site | cellular_component |
| GO:0070603 | 3 | gene_06320.t1,gene_09322.t1,gene_08023.t1 | | SWI/SNF superfamily-type complex | cellular_component |
| GO:0019005 | 2 | gene_01746.t1,gene_02629.t1 | | SCF ubiquitin ligase complex | cellular_component |
| GO:0019008 | 3 | gene_06655.t1,gene_04702.t1,gene_06930.t1 | | molybdopterin synthase complex | cellular_component |
| GO:0019773 | 6 | gene_05689.t1,gene_09182.t1,gene_07791.t1,gene_03863.t1,gene_09635.t1,gene_07038.t1 | | proteasome core complex, alpha-subunit complex | cellular_component |
| GO:0019774 | 2 | gene_08488.t1,gene_00399.t1 | | proteasome core complex, beta-subunit complex | cellular_component |
| GO:0044695 | 1 | gene_07195.t1 | | Dsc E3 ubiquitin ligase complex | cellular_component |
| GO:0000808 | 3 | gene_04582.t1,gene_07010.t1,gene_00675.t1 | | origin recognition complex | cellular_component |

**Table S3 Detailed Gene Ontology (GO) classification of protein families in the genome of *P. paneum* OM1 (*Continued*)**

| **GO ID** | **Seq Num** | | **Seq List** | **GO term** | **Category** |
| --- | --- | --- | --- | --- | --- |
| GO:0005759 | 29 | gene_08093.t1,gene_04289.t1,gene_04583.t1,gene_09157.t1,gene_06742.t1,gene_09037.t1,gene_09189.t1,gene_01424.t1,gene_07265.t1,gene_00305.t1,gene_03687.t1,gene_03551.t1,gene_07918.t1,gene_07649.t1,gene_07650.t1,gene_07164.t1,gene_10181.t1,gene_09415.t1,gene_02377.t1,gene_04355.t1,gene_03945.t1,gene_03604.t1,gene_07917.t1,gene_07598.t1,gene_03944.t1,gene_10389.t1,gene_01409.t1,gene_01019.t1,gene_07351.t1 | | mitochondrial matrix | cellular_component |
| GO:0032585 | 1 | gene_03697.t1 | | multivesicular body membrane | cellular_component |
| GO:0005758 | 11 | gene_02122.t1,gene_09260.t1,gene_04186.t1,gene_03957.t1,gene_00454.t1,gene_07625.t1,gene_09057.t1,gene_07113.t1,gene_10201.t1,gene_06951.t1,gene_09293.t1 | | mitochondrial intermembrane space | cellular_component |
| GO:0005819 | 4 | gene_10602.t1,gene_10291.t1,gene_08710.t1,gene_01198.t1 | | spindle | cellular_component |
| GO:0005811 | 3 | gene_04192.t1,gene_04414.t1,gene_04546.t1 | | lipid droplet | cellular_component |
| GO:0005816 | 6 | gene_06203.t1,gene_05213.t1,gene_08722.t1,gene_07037.t1,gene_05691.t1,gene_08161.t1 | | spindle pole body | cellular_component |
| GO:0005815 | 3 | gene_03191.t1,gene_10242.t1,gene_07336.t1 | | microtubule organizing center | cellular_component |
| GO:0033180 | 4 | gene_07027.t1,gene_05578.t1,gene_03967.t1,gene_07813.t1 | | proton-transporting V-type ATPase, V1 domain | cellular_component |
| GO:0017119 | 4 | gene_03232.t1,gene_10290.t1,gene_09555.t1,gene_03259.t1 | | Golgi transport complex | cellular_component |
| GO:0005854 | 2 | gene_09485.t1,gene_10387.t1 | | nascent polypeptide-associated complex | cellular_component |
| GO:0030430 | 1 | gene_01789.t1 | | host cell cytoplasm | cellular_component |
| GO:0046695 | 2 | gene_05658.t1,gene_08169.t1 | | SLIK (SAGA-like) complex | cellular_component |
| GO:0005680 | 8 | gene_02065.t1,gene_02001.t1,gene_05740.t1,gene_07231.t1,gene_07822.t1,gene_07294.t1,gene_04135.t1,gene_09747.t1 | | anaphase-promoting complex | cellular_component |
| GO:0000243 | 1 | gene_10367.t1 | | commitment complex | cellular_component |
| GO:0120114 | 3 | gene_04011.t1,gene_03682.t1,gene_07641.t1 | | Sm-like protein family complex | cellular_component |
| GO:0005779 | 5 | gene_06344.t1,gene_03732.t1,gene_07686.t1,gene_08176.t1,gene_06332.t1 | | integral component of peroxisomal membrane | cellular_component |
| GO:0005778 | 8 | gene_04177.t1,gene_03938.t1,gene_08631.t1,gene_06038.t1,gene_03246.t1,gene_00514.t1,gene_07529.t1,gene_07101.t1 | | peroxisomal membrane | cellular_component |
| GO:0005773 | 4 | gene_06164.t1,gene_10590.t1,gene_01063.t1,gene_01006.t1 | | vacuole | cellular_component |
| GO:0005777 | 17 | gene_10647.t1,gene_08069.t1,gene_09140.t1,gene_10070.t1,gene_00591.t1,gene_00341.t1,gene_10669.t1,gene_01977.t1,gene_01253.t1,gene_03008.t1,gene_09821.t1,gene_03068.t1,gene_08822.t1,gene_00443.t1,gene_04430.t1,gene_06049.t1,gene_00885.t1 | | peroxisome | cellular_component |

**Table S3 Detailed Gene Ontology (GO) classification of protein families in the genome of *P. paneum* OM1 (*Continued*)**

| **GO ID** | **Seq Num** | | **Seq List** | **GO term** | **Category** |
| --- | --- | --- | --- | --- | --- |
| GO:0005776 | 1 | gene_04192.t1 | | autophagosome | cellular_component |
| GO:0005775 | 1 | gene_09898.t1 | | vacuolar lumen | cellular_component |
| GO:0005774 | 31 | gene_02072.t1,gene_01969.t1,gene_03697.t1,gene_04805.t1,gene_01105.t1,gene_06519.t1,gene_03004.t1,gene_06176.t1,gene_00063.t1,gene_04999.t1,gene_01191.t1,gene_05641.t1,gene_04122.t1,gene_03580.t1,gene_05603.t1,gene_07597.t1,gene_08230.t1,gene_05113.t1,gene_10658.t1,gene_01593.t1,gene_06177.t1,gene_08284.t1,gene_03031.t1,gene_06178.t1,gene_08766.t1,gene_01709.t1,gene_00200.t1,gene_05271.t1,gene_08349.t1,gene_09815.t1,gene_07033.t1 | | vacuolar membrane | cellular_component |
| GO:0031902 | 1 | gene_01280.t1 | | late endosome membrane | cellular_component |
| GO:0031901 | 1 | gene_01186.t1 | | early endosome membrane | cellular_component |
| GO:0031588 | 1 | gene_09602.t1 | | nucleotide-activated protein kinase complex | cellular_component |
| GO:0005875 | 1 | gene_10487.t1 | | microtubule associated complex | cellular_component |
| GO:0055029 | 4 | gene_02194.t1,gene_09612.t1,gene_03951.t1,gene_03523.t1 | | nuclear DNA-directed RNA polymerase complex | cellular_component |
| GO:0012505 | 1 | gene_06125.t1 | | endomembrane system | cellular_component |
| GO:0032777 | 1 | gene_09599.t1 | | Piccolo NuA4 histone acetyltransferase complex | cellular_component |
| GO:0090575 | 1 | gene_00109.t1 | | RNA polymerase II transcription regulator complex | cellular_component |
| GO:0008622 | 2 | gene_03200.t1,gene_08287.t1 | | epsilon DNA polymerase complex | cellular_component |
| GO:0000818 | 2 | gene_04228.t1,gene_01007.t1 | | nuclear MIS12/MIND complex | cellular_component |
| GO:0000815 | 1 | gene_07913.t1 | | ESCRT III complex | cellular_component |
| GO:0000814 | 3 | gene_01250.t1,gene_10159.t1,gene_01280.t1 | | ESCRT II complex | cellular_component |
| GO:1990904 | 6 | gene_06557.t1,gene_03682.t1,gene_00876.t1,gene_08840.t1,gene_05876.t1,gene_08877.t1 | | ribonucleoprotein complex | cellular_component |
| GO:0000812 | 1 | gene_01406.t1 | | Swr1 complex | cellular_component |
| GO:0070461 | 2 | gene_09914.t1,gene_00832.t1 | | SAGA-type complex | cellular_component |
| GO:0070469 | 14 | gene_09613.t1,gene_04447.t1,gene_08412.t1,gene_03957.t1,gene_10025.t1,gene_03691.t1,gene_09825.t1,gene_08864.t1,gene_00091.t1,gene_09057.t1,gene_07351.t1,gene_08052.t1,gene_10382.t1,gene_00789.t1 | | respirasome | cellular_component |
| GO:0032592 | 1 | gene_02329.t1 | | integral component of mitochondrial membrane | cellular_component |
| GO:0072686 | 7 | gene_10529.t1,gene_05877.t1,gene_03377.t1,gene_08597.t1,gene_05155.t1,gene_06154.t1,gene_08869.t1 | | mitotic spindle | cellular_component |

**Table S3 Detailed Gene Ontology (GO) classification of protein families in the genome of *P. paneum* OM1 (*Continued*)**

| **GO ID** | **Seq Num** | | **Seq List** | **GO term** | **Category** |
| --- | --- | --- | --- | --- | --- |
| GO:0033179 | 5 | gene_06164.t1,gene_08230.t1,gene_03004.t1,gene_09011.t1,gene_07043.t1 | | proton-transporting V-type ATPase, V0 domain | cellular_component |
| GO:0005801 | 2 | gene_05520.t1,gene_05672.t1 | | cis-Golgi network | cellular_component |
| GO:0043596 | 6 | gene_00515.t1,gene_01710.t1,gene_01540.t1,gene_07862.t1,gene_08245.t1,gene_09071.t1 | | nuclear replication fork | cellular_component |
| GO:0035101 | 1 | gene_04166.t1 | | FACT complex | cellular_component |
| GO:0000324 | 1 | gene_04192.t1 | | fungal-type vacuole | cellular_component |
| GO:0031617 | 1 | gene_06875.t1 | | NMS complex | cellular_component |
| GO:0000329 | 1 | gene_06397.t1 | | fungal-type vacuole membrane | cellular_component |
| GO:1990234 | 2 | gene_04084.t1,gene_05796.t1 | | transferase complex | cellular_component |
| GO:0097361 | 2 | gene_00274.t1,gene_05175.t1 | | CIA complex | cellular_component |
| GO:0009277 | 5 | gene_06587.t1,gene_00145.t1,gene_04429.t1,gene_08114.t1,gene_06764.t1 | | fungal-type cell wall | cellular_component |
| GO:0005639 | 1 | gene_05713.t1 | | integral component of nuclear inner membrane | cellular_component |
| GO:0005887 | 5 | gene_01278.t1,gene_06654.t1,gene_07810.t1,gene_03819.t1,gene_01059.t1 | | integral component of plasma membrane | cellular_component |
| GO:0032299 | 2 | gene_08594.t1,gene_09856.t1 | | ribonuclease H2 complex | cellular_component |
| GO:0003918 | 2 | gene_04413.t1,gene_10607.t1 | | DNA topoisomerase type II (double strand cut, ATP-hydrolyzing) activity | molecular_function |
| GO:0051499 | 1 | gene_06698.t1 | | D-aminoacyl-tRNA deacylase activity | molecular_function |
| GO:0004814 | 1 | gene_03487.t1 | | arginine-tRNA ligase activity | molecular_function |
| GO:0045703 | 1 | gene_06564.t1 | | ketoreductase activity | molecular_function |
| GO:0034511 | 2 | gene_00407.t1,gene_05225.t1 | | U3 snoRNA binding | molecular_function |
| GO:0004140 | 1 | gene_07765.t1 | | dephospho-CoA kinase activity | molecular_function |
| GO:0017176 | 3 | gene_06610.t1,gene_09007.t1,gene_03239.t1 | | phosphatidylinositol N-acetylglucosaminyltransferase activity | molecular_function |
| GO:0017172 | 2 | gene_02958.t1,gene_06019.t1 | | cysteine dioxygenase activity | molecular_function |
| GO:0017178 | 1 | gene_02836.t1 | | diphthine-ammonia ligase activity | molecular_function |
| GO:0004630 | 3 | gene_09152.t1,gene_07324.t1,gene_06298.t1 | | phospholipase D activity | molecular_function |
| GO:0004514 | 2 | gene_04641.t1,gene_07335.t1 | | nicotinate-nucleotide diphosphorylase (carboxylating) activity | molecular_function |
| GO:0042030 | 1 | gene_02794.t1 | | ATPase inhibitor activity | molecular_function |
| GO:0004143 | 1 | gene_09000.t1 | | diacylglycerol kinase activity | molecular_function |

**Table S3 Detailed Gene Ontology (GO) classification of protein families in the genome of *P. paneum* OM1 (*Continued*)**

| **GO ID** | **Seq Num** | | **Seq List** | **GO term** | **Category** |
| --- | --- | --- | --- | --- | --- |
| GO:0004637 | 1 | gene_09629.t1 | | phosphoribosylamine-glycine ligase activity | molecular_function |
| GO:0031072 | 1 | gene_09414.t1 | | heat shock protein binding | molecular_function |
| GO:0031071 | 1 | gene_09097.t1 | | cysteine desulfurase activity | molecular_function |
| GO:0005484 | 4 | gene_09159.t1,gene_00350.t1,gene_07213.t1,gene_04059.t1 | | SNAP receptor activity | molecular_function |
| GO:0052878 | 1 | gene_10014.t1 | | linoleate 8R-lipoxygenase activity | molecular_function |
| GO:0051879 | 2 | gene_10118.t1,gene_10596.t1 | | Hsp90 protein binding | molecular_function |
| GO:0004848 | 1 | gene_07404.t1 | | ureidoglycolate hydrolase activity | molecular_function |
| GO:0004849 | 1 | gene_09819.t1 | | uridine kinase activity | molecular_function |
| GO:0004846 | 1 | gene_00591.t1 | | urate oxidase activity | molecular_function |
| GO:0004844 | 1 | gene_08282.t1 | | uracil DNA N-glycosylase activity | molecular_function |
| GO:0004842 | 12 | gene_03850.t1,gene_10015.t1,gene_03639.t1,gene_03834.t1,gene_08874.t1,gene_09531.t1,gene_01334.t1,gene_03617.t1,gene_06100.t1,gene_01616.t1,gene_09585.t1,gene_03784.t1 | | ubiquitin-protein transferase activity | molecular_function |
| GO:0004843 | 23 | gene_01114.t1,gene_05133.t1,gene_04184.t1,gene_07916.t1,gene_10416.t1,gene_10530.t1,gene_06133.t1,gene_03666.t1,gene_03039.t1,gene_00409.t1,gene_08301.t1,gene_03470.t1,gene_09853.t1,gene_07309.t1,gene_10317.t1,gene_04108.t1,gene_07313.t1,gene_07741.t1,gene_07732.t1,gene_06849.t1,gene_02020.t1,gene_00843.t1,gene_08038.t1 | | thiol-dependent deubiquitinase | molecular_function |
| GO:0030674 | 1 | gene_07381.t1 | | protein-macromolecule adaptor activity | molecular_function |
| GO:0004534 | 2 | gene_02253.t1,gene_07933.t1 | | 5'-3' exoribonuclease activity | molecular_function |
| GO:0004535 | 3 | gene_03654.t1,gene_04448.t1,gene_10433.t1 | | poly(A)-specific ribonuclease activity | molecular_function |
| GO:0005227 | 5 | gene_05633.t1,gene_07740.t1,gene_00710.t1,gene_01711.t1,gene_08243.t1 | | calcium activated cation channel activity | molecular_function |
| GO:0031491 | 1 | gene_10351.t1 | | nucleosome binding | molecular_function |
| GO:0031493 | 1 | gene_05805.t1 | | obsolete nucleosomal histone binding | molecular_function |
| GO:0043743 | 1 | gene_06078.t1 | | LPPG:FO 2-phospho-L-lactate transferase activity | molecular_function |
| GO:0000285 | 1 | gene_02623.t1 | | 1-phosphatidylinositol-3-phosphate 5-kinase activity | molecular_function |

**Table S3 Detailed Gene Ontology (GO) classification of protein families in the genome of *P. paneum* OM1 (*Continued*)**

| **GO ID** | **Seq Num** | | **Seq List** | **GO term** | **Category** |
| --- | --- | --- | --- | --- | --- |
| GO:0000287 | 42 | gene_02627.t1,gene_09469.t1,gene_09154.t1,gene_08592.t1,gene_08070.t1,gene_10016.t1,gene_00524.t1,gene_03413.t1,gene_07215.t1,gene_01087.t1,gene_10595.t1,gene_08515.t1,gene_03025.t1,gene_00896.t1,gene_02959.t1,gene_02481.t1,gene_01989.t1,gene_06798.t1,gene_02115.t1,gene_02333.t1,gene_00653.t1,gene_02634.t1,gene_08855.t1,gene_01270.t1,gene_03558.t1,gene_07283.t1,gene_03899.t1,gene_02366.t1,gene_04010.t1,gene_02066.t1,gene_03017.t1,gene_05669.t1,gene_02158.t1,gene_09009.t1,gene_08720.t1,gene_01056.t1,gene_09510.t1,gene_02419.t1,gene_01001.t1,gene_03086.t1,gene_01319.t1,gene_06714.t1 | | magnesium ion binding | molecular_function |
| GO:0004449 | 2 | gene_08720.t1,gene_02366.t1 | | isocitrate dehydrogenase (NAD+) activity | molecular_function |
| GO:0103045 | 2 | gene_04583.t1,gene_06573.t1 | | methione N-acyltransferase activity | molecular_function |
| GO:0008176 | 1 | gene_10160.t1 | | tRNA (guanine-N7-)-methyltransferase activity | molecular_function |
| GO:0051010 | 1 | gene_10486.t1 | | microtubule plus-end binding | molecular_function |
| GO:0008289 | 15 | gene_02702.t1,gene_07300.t1,gene_04067.t1,gene_10059.t1,gene_06355.t1,gene_03033.t1,gene_07310.t1,gene_10269.t1,gene_10312.t1,gene_01129.t1,gene_09579.t1,gene_08315.t1,gene_02094.t1,gene_04653.t1,gene_07273.t1 | | lipid binding | molecular_function |
| GO:0051015 | 4 | gene_01209.t1,gene_07456.t1,gene_02045.t1,gene_08209.t1 | | actin filament binding | molecular_function |
| GO:0008650 | 1 | gene_05806.t1 | | rRNA (uridine-2'-O-)-methyltransferase activity | molecular_function |
| GO:0048039 | 1 | gene_02653.t1 | | ubiquinone binding | molecular_function |
| GO:0048038 | 10 | gene_06041.t1,gene_01764.t1,gene_04449.t1,gene_03522.t1,gene_10189.t1,gene_01707.t1,gene_07681.t1,gene_09283.t1,gene_09128.t1,gene_09373.t1 | | quinone binding | molecular_function |
| GO:0140575 | 1 | gene_05653.t1 | | transmembrane monodehydroascorbate reductase activity | molecular_function |
| GO:0004664 | 1 | gene_09255.t1 | | prephenate dehydratase activity | molecular_function |
| GO:0004665 | 1 | gene_00560.t1 | | prephenate dehydrogenase (NADP+) activity | molecular_function |
| GO:0004190 | 13 | gene_09201.t1,gene_04924.t1,gene_09716.t1,gene_05472.t1,gene_00340.t1,gene_06211.t1,gene_04744.t1,gene_10352.t1,gene_01851.t1,gene_07487.t1,gene_00828.t1,gene_06094.t1,gene_05703.t1 | | aspartic-type endopeptidase activity | molecular_function |
| GO:0004663 | 2 | gene_09996.t1,gene_08511.t1 | | Rab geranylgeranyltransferase activity | molecular_function |
| GO:0004660 | 1 | gene_04040.t1 | | protein farnesyltransferase activity | molecular_function |

**Table S3 Detailed Gene Ontology (GO) classification of protein families in the genome of *P. paneum* OM1 (*Continued*)**

| **GO ID** | **Seq Num** | | **Seq List** | **GO term** | **Category** |
| --- | --- | --- | --- | --- | --- |
| GO:0003899 | 24 | gene_06259.t1,gene_00677.t1,gene_08353.t1,gene_04356.t1,gene_03180.t1,gene_03951.t1,gene_10197.t1,gene_02110.t1,gene_09612.t1,gene_06171.t1,gene_01093.t1,gene_02230.t1,gene_04203.t1,gene_05314.t1,gene_09944.t1,gene_09036.t1,gene_02194.t1,gene_08304.t1,gene_04647.t1,gene_01696.t1,gene_08095.t1,gene_04655.t1,gene_05962.t1,gene_09823.t1 | | DNA-directed 5'-3' RNA polymerase activity | molecular_function |
| GO:0004198 | 2 | gene_01022.t1,gene_03772.t1 | | calcium-dependent cysteine-type endopeptidase activity | molecular_function |
| GO:0004668 | 2 | gene_00589.t1,gene_08117.t1 | | protein-arginine deiminase activity | molecular_function |
| GO:0000107 | 1 | gene_08292.t1 | | imidazoleglycerol-phosphate synthase activity | molecular_function |
| GO:0003878 | 2 | gene_06452.t1,gene_06451.t1 | | ATP citrate synthase activity | molecular_function |
| GO:0003879 | 1 | gene_08515.t1 | | ATP phosphoribosyltransferase activity | molecular_function |
| GO:0003872 | 1 | gene_03414.t1 | | 6-phosphofructokinase activity | molecular_function |
| GO:0003870 | 1 | gene_04355.t1 | | 5-aminolevulinate synthase activity | molecular_function |
| GO:0003871 | 3 | gene_00382.t1,gene_03115.t1,gene_02061.t1 | | 5-methyltetrahydropteroyltriglutamate-homocysteine S-methyltransferase activity | molecular_function |
| GO:0003876 | 1 | gene_05147.t1 | | AMP deaminase activity | molecular_function |
| GO:0003877 | 2 | gene_09581.t1,gene_07475.t1 | | ATP adenylyltransferase activity | molecular_function |
| GO:0050313 | 2 | gene_08465.t1,gene_05410.t1 | | sulfur dioxygenase activity | molecular_function |
| GO:0004069 | 5 | gene_05313.t1,gene_00862.t1,gene_03995.t1,gene_00460.t1,gene_05306.t1 | | L-aspartate:2-oxoglutarate aminotransferase activity | molecular_function |
| GO:0004060 | 1 | gene_10026.t1 | | arylamine N-acetyltransferase activity | molecular_function |
| GO:0004061 | 8 | gene_05407.t1,gene_03462.t1,gene_03134.t1,gene_03297.t1,gene_10549.t1,gene_08894.t1,gene_04519.t1,gene_10649.t1 | | arylformamidase activity | molecular_function |
| GO:0004065 | 2 | gene_05109.t1,gene_06641.t1 | | arylsulfatase activity | molecular_function |
| GO:0004066 | 2 | gene_00321.t1,gene_10129.t1 | | asparagine synthase (glutamine-hydrolyzing) activity | molecular_function |
| GO:0004067 | 2 | gene_07958.t1,gene_07801.t1 | | asparaginase activity | molecular_function |
| GO:0019211 | 2 | gene_08765.t1,gene_03613.t1 | | phosphatase activator activity | molecular_function |
| GO:0102344 | 1 | gene_04035.t1 | | 3-hydroxy-behenoyl-CoA dehydratase activity | molecular_function |
| GO:0018580 | 5 | gene_02947.t1,gene_00465.t1,gene_01391.t1,gene_04117.t1,gene_04427.t1 | | nitronate monooxygenase activity | molecular_function |
| GO:0004348 | 1 | gene_04370.t1 | | glucosylceramidase activity | molecular_function |
| GO:0071933 | 1 | gene_05913.t1 | | Arp2/3 complex binding | molecular_function |
| GO:0000832 | 1 | gene_02352.t1 | | inositol hexakisphosphate 5-kinase activity | molecular_function |

**Table S3 Detailed Gene Ontology (GO) classification of protein families in the genome of *P. paneum* OM1 (*Continued*)**

| **GO ID** | **Seq Num** | | **Seq List** | **GO term** | **Category** |
| --- | --- | --- | --- | --- | --- |
| GO:0016631 | 1 | gene_02332.t1 | | enoyl-[acyl-carrier-protein] reductase activity | molecular_function |
| GO:0004345 | 1 | gene_06816.t1 | | glucose-6-phosphate dehydrogenase activity | molecular_function |
| GO:0070403 | 12 | gene_05973.t1,gene_09874.t1,gene_10177.t1,gene_01335.t1,gene_05523.t1,gene_04231.t1,gene_06021.t1,gene_03898.t1,gene_08580.t1,gene_07063.t1,gene_09792.t1,gene_08826.t1 | | NAD+ binding | molecular_function |
| GO:1990380 | 1 | gene_07741.t1 | | Lys48-specific deubiquitinase activity | molecular_function |
| GO:0070330 | 1 | gene_06727.t1 | | aromatase activity | molecular_function |
| GO:0047750 | 3 | gene_03504.t1,gene_01909.t1,gene_06509.t1 | | cholestenol delta-isomerase activity | molecular_function |
| GO:0052654 | 2 | gene_09326.t1,gene_00557.t1 | | L-leucine transaminase activity | molecular_function |
| GO:0052655 | 2 | gene_09326.t1,gene_00557.t1 | | L-valine transaminase activity | molecular_function |
| GO:0052656 | 2 | gene_09326.t1,gene_00557.t1 | | L-isoleucine transaminase activity | molecular_function |
| GO:0047710 | 1 | gene_09419.t1 | | bis(5'-adenosyl)-triphosphatase activity | molecular_function |
| GO:0061799 | 1 | gene_06655.t1 | | cyclic pyranopterin monophosphate synthase activity | molecular_function |
| GO:0016742 | 1 | gene_01843.t1 | | hydroxymethyl-, formyl- and related transferase activity | molecular_function |
| GO:0016743 | 1 | gene_00359.t1 | | carboxyl- or carbamoyltransferase activity | molecular_function |
| GO:0016740 | 102 | gene_08666.t1,gene_09450.t1,gene_04178.t1,gene_04412.t1,gene_06128.t1,gene_03590.t1,gene_00671.t1,gene_10105.t1,gene_07645.t1,gene_04626.t1,gene_08706.t1,gene_07932.t1,gene_03347.t1,gene_03275.t1,gene_10177.t1,gene_02149.t1,gene_05459.t1,gene_05707.t1,gene_06546.t1,gene_04142.t1,gene_08678.t1,gene_06776.t1,gene_01755.t1,gene_03864.t1,gene_10080.t1,gene_04432.t1,gene_04231.t1,gene_00857.t1,gene_09966.t1,gene_09874.t1,gene_01092.t1,gene_05993.t1,gene_10462.t1,gene_07852.t1,gene_10548.t1,gene_02439.t1,gene_02854.t1,gene_09197.t1,gene_02593.t1,gene_01088.t1,gene_04371.t1,gene_03340.t1,gene_00114.t1,gene_06074.t1,gene_07183.t1,gene_07446.t1,gene_07447.t1,gene_08820.t1,gene_08799.t1,gene_05652.t1,gene_09468.t1,gene_09133.t1,gene_03924.t1,gene_06003.t1,gene_07853.t1,gene_02477.t1,gene_08810.t1,gene_01254.t1,gene_10202.t1,gene_05081.t1,gene_10547.t1,gene_01166.t1,gene_09281.t1,gene_08982.t1,gene_01531.t1,gene_09559.t1,gene_10565.t1,gene_04508.t1,gene_05756.t1,gene_03029.t1,gene_00695.t1,gene_07196.t1,gene_05948.t1,gene_03888.t1,gene_08010.t1,gene_07141.t1,gene_05392.t1,gene_04038.t1,gene_06397.t1,gene_02324.t1,gene_01560.t1,gene_09505.t1,gene_09470.t1,gene_02384.t1,gene_09623.t1,gene_02270.t1,gene_01618.t1,gene_06022.t1,gene_05523.t1,gene_06968.t1, | | transferase activity | molecular_function |

**Table S3 Detailed Gene Ontology (GO) classification of protein families in the genome of *P. paneum* OM1 (*Continued*)**

| **GO ID** | **Seq Num** | | **Seq List** | **GO term** | **Category** |
| --- | --- | --- | --- | --- | --- |
| GO:0016740 | 102 | gene_05193.t1,gene_06099.t1,gene_06533.t1,gene_04292.t1,gene_05771.t1,gene_07274.t1,gene_10303.t1,gene_09107.t1,gene_00403.t1,gene_03898.t1,gene_07286.t1,gene_07655.t1 | | transferase activity | molecular_function |
| GO:0016746 | 30 | gene_08900.t1,gene_03496.t1,gene_01580.t1,gene_02076.t1,gene_00532.t1,gene_08782.t1,gene_05504.t1,gene_06977.t1,gene_10186.t1,gene_07200.t1,gene_08786.t1,gene_06220.t1,gene_08783.t1,gene_09758.t1,gene_09240.t1,gene_07438.t1,gene_07205.t1,gene_01784.t1,gene_10115.t1,gene_07134.t1,gene_02048.t1,gene_05902.t1,gene_09676.t1,gene_08784.t1,gene_09801.t1,gene_08780.t1,gene_07576.t1,gene_06478.t1,gene_08787.t1,gene_05009.t1 | | acyltransferase activity | molecular_function |
| GO:0016747 | 19 | gene_05384.t1,gene_08954.t1,gene_01953.t1,gene_06421.t1,gene_07539.t1,gene_01462.t1,gene_08222.t1,gene_08102.t1,gene_00785.t1,gene_01103.t1,gene_09355.t1,gene_08872.t1,gene_01171.t1,gene_08166.t1,gene_01932.t1,gene_02819.t1,gene_10660.t1,gene_09751.t1,gene_01489.t1 | | acyltransferase activity, transferring groups other than amino-acyl groups | molecular_function |
| GO:0016671 | 1 | gene_06197.t1 | | oxidoreductase activity, acting on a sulfur group of donors, disulfide as acceptor | molecular_function |
| GO:0016162 | 2 | gene_05405.t1,gene_01844.t1 | | cellulose 1,4-beta-cellobiosidase activity | molecular_function |
| GO:0016296 | 1 | gene_02332.t1 | | palmitoyl-[acyl-carrier-protein] hydrolase activity | molecular_function |
| GO:0016298 | 1 | gene_04546.t1 | | lipase activity | molecular_function |
| GO:0000334 | 1 | gene_07394.t1 | | 3-hydroxyanthranilate 3,4-dioxygenase activity | molecular_function |
| GO:0020037 | 115 | gene_03326.t1,gene_05483.t1,gene_09837.t1,gene_02919.t1,gene_08439.t1,gene_00050.t1,gene_07089.t1,gene_10673.t1,gene_10252.t1,gene_03957.t1,gene_01732.t1,gene_02074.t1,gene_07674.t1,gene_01461.t1,gene_10670.t1,gene_06181.t1,gene_08016.t1,gene_08361.t1,gene_08018.t1,gene_01818.t1,gene_05434.t1,gene_02731.t1,gene_05974.t1,gene_05157.t1,gene_01463.t1,gene_04764.t1,gene_08723.t1,gene_07431.t1,gene_04130.t1,gene_01658.t1,gene_09909.t1,gene_00545.t1,gene_07281.t1,gene_07691.t1,gene_02013.t1,gene_04065.t1,gene_07786.t1,gene_02311.t1,gene_06676.t1,gene_01284.t1,gene_01460.t1,gene_03391.t1,gene_00338.t1,gene_09504.t1,gene_09095.t1,gene_03669.t1,gene_07369.t1,gene_01111.t1,gene_09188.t1,gene_01903.t1,gene_07549.t1,gene_07833.t1,gene_02026.t1,gene_09177.t1,gene_03816.t1,gene_00994.t1,gene_00758.t1,gene_03517.t1,gene_00220.t1,gene_01181.t1,gene_00834.t1,gene_01324.t1,gene_01587.t1,gene_03353.t1,gene_07934.t1,gene_06475.t1,gene_07956.t1,gene_04361.t1,gene_01476.t1,gene_04083.t1,gene_07490.t1,gene_00621.t1,gene_06727.t1,gene_00777.t1,gene_07117.t1,gene_07848.t1,gene_07526.t1,gene_03126.t1,gene_02830.t1,gene_06168.t1, | | heme binding | molecular_function |

**Table S3 Detailed Gene Ontology (GO) classification of protein families in the genome of *P. paneum* OM1 (*Continued*)**

| **GO ID** | **Seq Num** | | **Seq List** | **GO term** | **Category** |
| --- | --- | --- | --- | --- | --- |
| GO:0020037 | 115 | gene_10593.t1,gene_00717.t1,gene_02312.t1,gene_09778.t1,gene_02258.t1,gene_04118.t1,gene_10672.t1,gene_08446.t1,gene_09353.t1,gene_09980.t1,gene_08724.t1,gene_09389.t1,gene_09970.t1,gene_03369.t1,gene_04527.t1,gene_08017.t1,gene_07727.t1,gene_01543.t1,gene_02248.t1,gene_05975.t1,gene_09896.t1,gene_03978.t1,gene_00285.t1,gene_10014.t1,gene_09981.t1,gene_08991.t1,gene_06715.t1,gene_07507.t1,gene_07556.t1,gene_02272.t1,gene_00543.t1,gene_02285.t1,gene_08430.t1,gene_03226.t1,gene_09394.t1 | | heme binding | molecular_function |
| GO:0030060 | 2 | gene_09160.t1,gene_09730.t1 | | L-malate dehydrogenase activity | molecular_function |
| GO:0052862 | 1 | gene_01601.t1 | | glucan endo-1,4-beta-glucanase activity, C-3 substituted reducing group | molecular_function |
| GO:0052861 | 1 | gene_01601.t1 | | glucan endo-1,3-beta-glucanase activity, C-3 substituted reducing group | molecular_function |
| GO:0033862 | 1 | gene_06009.t1 | | UMP kinase activity | molecular_function |
| GO:0034386 | 1 | gene_08073.t1 | | 4-aminobutyrate:2-oxoglutarate transaminase activity | molecular_function |
| GO:0008420 | 2 | gene_05704.t1,gene_00538.t1 | | RNA polymerase II CTD heptapeptide repeat phosphatase activity | molecular_function |
| GO:0004855 | 1 | gene_10070.t1 | | xanthine oxidase activity | molecular_function |
| GO:0004856 | 1 | gene_04233.t1 | | xylulokinase activity | molecular_function |
| GO:0004851 | 1 | gene_06837.t1 | | uroporphyrin-III C-methyltransferase activity | molecular_function |
| GO:0004853 | 1 | gene_01680.t1 | | uroporphyrinogen decarboxylase activity | molecular_function |
| GO:0004852 | 1 | gene_10525.t1 | | uroporphyrinogen-III synthase activity | molecular_function |
| GO:0000773 | 1 | gene_05187.t1 | | phosphatidyl-N-methylethanolamine N-methyltransferase activity | molecular_function |
| GO:0004528 | 1 | gene_04241.t1 | | phosphodiesterase I activity | molecular_function |
| GO:0004525 | 8 | gene_03396.t1,gene_06315.t1,gene_04160.t1,gene_05421.t1,gene_05841.t1,gene_08713.t1,gene_04425.t1,gene_10512.t1 | | ribonuclease III activity | molecular_function |
| GO:0000774 | 1 | gene_03945.t1 | | adenyl-nucleotide exchange factor activity | molecular_function |
| GO:0004527 | 11 | gene_04510.t1,gene_02998.t1,gene_10164.t1,gene_09922.t1,gene_07789.t1,gene_07321.t1,gene_03737.t1,gene_06309.t1,gene_04548.t1,gene_09684.t1,gene_04971.t1 | | exonuclease activity | molecular_function |
| GO:0004526 | 2 | gene_06449.t1,gene_03157.t1 | | ribonuclease P activity | molecular_function |
| GO:0004521 | 5 | gene_00740.t1,gene_04402.t1,gene_04328.t1,gene_03344.t1,gene_00030.t1 | | endoribonuclease activity | molecular_function |

**Table S3 Detailed Gene Ontology (GO) classification of protein families in the genome of *P. paneum* OM1 (*Continued*)**

| **GO ID** | **Seq Num** | | **Seq List** | **GO term** | **Category** |
| --- | --- | --- | --- | --- | --- |
| GO:0004520 | 2 | gene_06548.t1,gene_00867.t1 | | endodeoxyribonuclease activity | molecular_function |
| GO:0004523 | 11 | gene_04909.t1,gene_06028.t1,gene_04178.t1,gene_05388.t1,gene_04075.t1,gene_05004.t1,gene_07853.t1,gene_04505.t1,gene_07852.t1,gene_04116.t1,gene_04971.t1 | | RNA-DNA hybrid ribonuclease activity | molecular_function |
| GO:0009922 | 2 | gene_01892.t1,gene_08158.t1 | | fatty acid elongase activity | molecular_function |
| GO:0009039 | 1 | gene_01624.t1 | | urease activity | molecular_function |
| GO:0015165 | 2 | gene_10475.t1,gene_02541.t1 | | pyrimidine nucleotide-sugar transmembrane transporter activity | molecular_function |
| GO:0005216 | 3 | gene_10604.t1,gene_04721.t1,gene_09028.t1 | | ion channel activity | molecular_function |
| GO:0050567 | 2 | gene_02324.t1,gene_05707.t1 | | glutaminyl-tRNA synthase (glutamine-hydrolyzing) activity | molecular_function |
| GO:0000293 | 9 | gene_10564.t1,gene_07511.t1,gene_00830.t1,gene_00797.t1,gene_07124.t1,gene_02172.t1,gene_06588.t1,gene_01257.t1,gene_03078.t1 | | ferric-chelate reductase activity | molecular_function |
| GO:0000298 | 1 | gene_05603.t1 | | endopolyphosphatase activity | molecular_function |
| GO:0004298 | 10 | gene_00408.t1,gene_08488.t1,gene_00399.t1,gene_07791.t1,gene_02375.t1,gene_03863.t1,gene_05873.t1,gene_09929.t1,gene_02372.t1,gene_03707.t1 | | threonine-type endopeptidase activity | molecular_function |
| GO:0004451 | 2 | gene_10345.t1,gene_00805.t1 | | isocitrate lyase activity | molecular_function |
| GO:0005458 | 1 | gene_09248.t1 | | GDP-mannose transmembrane transporter activity | molecular_function |
| GO:0004452 | 1 | gene_06520.t1 | | isopentenyl-diphosphate delta-isomerase activity | molecular_function |
| GO:0004455 | 1 | gene_09113.t1 | | ketol-acid reductoisomerase activity | molecular_function |
| GO:0004459 | 1 | gene_02156.t1 | | L-lactate dehydrogenase activity | molecular_function |
| GO:0030170 | 56 | gene_01418.t1,gene_08884.t1,gene_08666.t1,gene_04197.t1,gene_09469.t1,gene_03196.t1,gene_10500.t1,gene_02197.t1,gene_06682.t1,gene_09470.t1,gene_07598.t1,gene_01259.t1,gene_04762.t1,gene_10447.t1,gene_05313.t1,gene_03559.t1,gene_05306.t1,gene_10105.t1,gene_06621.t1,gene_03700.t1,gene_09097.t1,gene_04082.t1,gene_09066.t1,gene_02648.t1,gene_04383.t1,gene_04701.t1,gene_02844.t1,gene_09776.t1,gene_05675.t1,gene_00862.t1,gene_00962.t1,gene_07328.t1,gene_10583.t1,gene_00460.t1,gene_09185.t1,gene_01168.t1,gene_02277.t1,gene_05315.t1,gene_05088.t1,gene_02149.t1,gene_04355.t1,gene_03736.t1,gene_00551.t1,gene_08073.t1,gene_02827.t1,gene_01381.t1,gene_01167.t1,gene_05961.t1,gene_04015.t1,gene_03995.t1,gene_06750.t1,gene_10303.t1,gene_01314.t1,gene_03988.t1,gene_10066.t1,gene_06828.t1 | | pyridoxal phosphate binding | molecular_function |
| GO:0102500 | 1 | gene_00709.t1 | | beta-maltose 4-alpha-glucanotransferase activity | molecular_function |

**Table S3 Detailed Gene Ontology (GO) classification of protein families in the genome of *P. paneum* OM1 (*Continued*)**

| **GO ID** | **Seq Num** | | **Seq List** | **GO term** | **Category** |
| --- | --- | --- | --- | --- | --- |
| GO:0004644 | 1 | gene_00615.t1 | | phosphoribosylglycinamide formyltransferase activity | molecular_function |
| GO:0046899 | 1 | gene_01019.t1 | | nucleoside triphosphate adenylate kinase activity | molecular_function |
| GO:0004181 | 3 | gene_01063.t1,gene_06882.t1,gene_07429.t1 | | metallocarboxypeptidase activity | molecular_function |
| GO:0004180 | 2 | gene_05177.t1,gene_00384.t1 | | carboxypeptidase activity | molecular_function |
| GO:0004185 | 9 | gene_05176.t1,gene_05858.t1,gene_00369.t1,gene_09764.t1,gene_10590.t1,gene_07464.t1,gene_08088.t1,gene_02737.t1,gene_00605.t1 | | serine-type carboxypeptidase activity | molecular_function |
| GO:0003887 | 8 | gene_01057.t1,gene_05518.t1,gene_06076.t1,gene_04737.t1,gene_06309.t1,gene_00595.t1,gene_06856.t1,gene_03200.t1 | | DNA-directed DNA polymerase activity | molecular_function |
| GO:0004674 | 50 | gene_00799.t1,gene_01198.t1,gene_10210.t1,gene_00740.t1,gene_04066.t1,gene_03475.t1,gene_03660.t1,gene_07626.t1,gene_02520.t1,gene_10213.t1,gene_02088.t1,gene_07408.t1,gene_00581.t1,gene_03903.t1,gene_08500.t1,gene_03061.t1,gene_10369.t1,gene_00017.t1,gene_08610.t1,gene_02432.t1,gene_02838.t1,gene_06106.t1,gene_01223.t1,gene_03314.t1,gene_08229.t1,gene_09242.t1,gene_00801.t1,gene_00030.t1,gene_04388.t1,gene_09710.t1,gene_05628.t1,gene_00848.t1,gene_07837.t1,gene_08650.t1,gene_00208.t1,gene_02155.t1,gene_07396.t1,gene_06526.t1,gene_08612.t1,gene_03199.t1,gene_00548.t1,gene_07078.t1,gene_03598.t1,gene_05629.t1,gene_04642.t1,gene_07102.t1,gene_05244.t1,gene_03773.t1,gene_05846.t1,gene_09034.t1 | | protein serine/threonine kinase activity | molecular_function |
| GO:0003885 | 1 | gene_02044.t1 | | D-arabinono-1,4-lactone oxidase activity | molecular_function |
| GO:0003884 | 6 | gene_07698.t1,gene_06144.t1,gene_05946.t1,gene_10150.t1,gene_05244.t1,gene_02986.t1 | | D-amino-acid oxidase activity | molecular_function |
| GO:0004671 | 1 | gene_01116.t1 | | protein C-terminal S-isoprenylcysteine carboxyl O-methyltransferase activity | molecular_function |
| GO:0003882 | 1 | gene_10329.t1 | | CDP-diacylglycerol-serine O-phosphatidyltransferase activity | molecular_function |
| GO:0004672 | 101 | gene_03602.t1,gene_05928.t1,gene_01507.t1,gene_06412.t1,gene_07899.t1,gene_04520.t1,gene_09211.t1,gene_08036.t1,gene_00303.t1,gene_08804.t1,gene_07649.t1,gene_07918.t1,gene_07650.t1,gene_09416.t1,gene_06711.t1,gene_07804.t1,gene_01183.t1,gene_05442.t1,gene_07924.t1,gene_08845.t1,gene_01341.t1,gene_09046.t1,gene_02514.t1,gene_02449.t1,gene_04923.t1,gene_03538.t1,gene_09871.t1,gene_07312.t1,gene_09780.t1,gene_05105.t1,gene_04467.t1,gene_03818.t1,gene_03645.t1,gene_04566.t1,gene_07503.t1,gene_04358.t1,gene_01564.t1,gene_00879.t1,gene_10464.t1,gene_07298.t1,gene_04219.t1,gene_00486.t1,gene_03627.t1,gene_03759.t1,gene_04554.t1, | | protein kinase activity | molecular_function |

**Table S3 Detailed Gene Ontology (GO) classification of protein families in the genome of *P. paneum* OM1 (*Continued*)**

| **GO ID** | **Seq Num** | | **Seq List** | **GO term** | **Category** |
| --- | --- | --- | --- | --- | --- |
| GO:0004672 | 101 | gene_07842.t1,gene_03351.t1,gene_03896.t1,gene_06310.t1,gene_07695.t1,gene_04663.t1,gene_02062.t1,gene_10372.t1,gene_07797.t1,gene_02577.t1,gene_07370.t1,gene_06413.t1,gene_03338.t1,gene_05866.t1,gene_03551.t1,gene_05879.t1,gene_09271.t1,gene_09224.t1,gene_03637.t1,gene_06792.t1,gene_03535.t1,gene_01081.t1,gene_08044.t1,gene_09645.t1,gene_03268.t1,gene_09582.t1,gene_02250.t1,gene_09222.t1,gene_01353.t1,gene_07160.t1,gene_09064.t1,gene_01556.t1,gene_05330.t1,gene_05671.t1,gene_06117.t1,gene_09735.t1,gene_05142.t1,gene_03960.t1,gene_06624.t1,gene_01173.t1,gene_04302.t1,gene_03461.t1,gene_02412.t1,gene_09870.t1,gene_02304.t1,gene_02734.t1,gene_09325.t1,gene_05305.t1,gene_07917.t1,gene_05837.t1,gene_08460.t1,gene_00089.t1,gene_04567.t1,gene_08981.t1,gene_02175.t1,gene_00625.t1 | | protein kinase activity | molecular_function |
| GO:0003868 | 2 | gene_03807.t1,gene_10000.t1 | | 4-hydroxyphenylpyruvate dioxygenase activity | molecular_function |
| GO:0003861 | 1 | gene_07021.t1 | | 3-isopropylmalate dehydratase activity | molecular_function |
| GO:0003863 | 2 | gene_03837.t1,gene_03836.t1 | | 3-methyl-2-oxobutanoate dehydrogenase (2-methylpropanoyl-transferring) activity | molecular_function |
| GO:0003862 | 2 | gene_02066.t1,gene_10595.t1 | | 3-isopropylmalate dehydrogenase activity | molecular_function |
| GO:0003865 | 1 | gene_02943.t1 | | 3-oxo-5-alpha-steroid 4-dehydrogenase activity | molecular_function |
| GO:0003864 | 2 | gene_01676.t1,gene_03893.t1 | | 3-methyl-2-oxobutanoate hydroxymethyltransferase activity | molecular_function |
| GO:0001735 | 1 | gene_03186.t1 | | prenylcysteine oxidase activity | molecular_function |
| GO:0003866 | 1 | gene_02251.t1 | | 3-phosphoshikimate 1-carboxyvinyltransferase activity | molecular_function |
| GO:0018576 | 4 | gene_02569.t1,gene_09653.t1,gene_06959.t1,gene_02177.t1 | | catechol 1,2-dioxygenase activity | molecular_function |
| GO:0004077 | 1 | gene_00453.t1 | | biotin-[acetyl-CoA-carboxylase] ligase activity | molecular_function |
| GO:0004076 | 1 | gene_09462.t1 | | biotin synthase activity | molecular_function |
| GO:0004075 | 1 | gene_01074.t1 | | biotin carboxylase activity | molecular_function |
| GO:0004072 | 2 | gene_09263.t1,gene_05635.t1 | | aspartate kinase activity | molecular_function |
| GO:0004070 | 1 | gene_06540.t1 | | aspartate carbamoyltransferase activity | molecular_function |
| GO:1901363 | 2 | gene_03800.t1,gene_00746.t1 | | heterocyclic compound binding | molecular_function |
| GO:0016628 | 8 | gene_04364.t1,gene_08853.t1,gene_01993.t1,gene_06783.t1,gene_07280.t1,gene_02975.t1,gene_08518.t1,gene_04110.t1 | | oxidoreductase activity, acting on the CH-CH group of donors, NAD or NADP as acceptor | molecular_function |

**Table S3 Detailed Gene Ontology (GO) classification of protein families in the genome of *P. paneum* OM1 (*Continued*)**

| **GO ID** | **Seq Num** | | **Seq List** | **GO term** | **Category** |
| --- | --- | --- | --- | --- | --- |
| GO:0016627 | 12 | gene_08047.t1,gene_07523.t1,gene_00970.t1,gene_03858.t1,gene_00765.t1,gene_01480.t1,gene_10013.t1,gene_06311.t1,gene_00377.t1,gene_01249.t1,gene_07285.t1,gene_08764.t1 | | oxidoreductase activity, acting on the CH-CH group of donors | molecular_function |
| GO:0016620 | 26 | gene_02911.t1,gene_09372.t1,gene_05395.t1,gene_00449.t1,gene_10347.t1,gene_05735.t1,gene_03825.t1,gene_06860.t1,gene_00823.t1,gene_02341.t1,gene_00942.t1,gene_09760.t1,gene_06893.t1,gene_02582.t1,gene_06187.t1,gene_02926.t1,gene_03302.t1,gene_03400.t1,gene_02918.t1,gene_01888.t1,gene_06400.t1,gene_00251.t1,gene_04522.t1,gene_06674.t1,gene_00976.t1,gene_09480.t1 | | oxidoreductase activity, acting on the aldehyde or oxo group of donors, NAD or NADP as acceptor | molecular_function |
| GO:0050072 | 1 | gene_05772.t1 | | m7G(5')pppN diphosphatase activity | molecular_function |
| GO:0046873 | 15 | gene_06075.t1,gene_05542.t1,gene_04003.t1,gene_02147.t1,gene_07637.t1,gene_09812.t1,gene_00870.t1,gene_10034.t1,gene_02742.t1,gene_01067.t1,gene_01748.t1,gene_07099.t1,gene_09752.t1,gene_03612.t1,gene_05086.t1 | | metal ion transmembrane transporter activity | molecular_function |
| GO:0046872 | 397 | gene_02667.t1,gene_03667.t1,gene_08646.t1,gene_00568.t1,gene_00351.t1,gene_09113.t1,gene_00421.t1,gene_00958.t1,gene_06101.t1,gene_04991.t1,gene_06118.t1,gene_09188.t1,gene_01065.t1,gene_01682.t1,gene_10229.t1,gene_09585.t1,gene_05974.t1,gene_00180.t1,gene_09283.t1,gene_04534.t1,gene_07456.t1,gene_07700.t1,gene_00545.t1,gene_00595.t1,gene_05911.t1,gene_04371.t1,gene_09044.t1,gene_00201.t1,gene_04426.t1,gene_00722.t1,gene_09095.t1,gene_00677.t1,gene_04402.t1,gene_10466.t1,gene_10373.t1,gene_02349.t1,gene_07792.t1,gene_08676.t1,gene_10065.t1,gene_00010.t1,gene_10140.t1,gene_04656.t1,gene_02533.t1,gene_00960.t1,gene_10405.t1,gene_03541.t1,gene_08858.t1,gene_10245.t1,gene_06928.t1,gene_09277.t1,gene_03019.t1,gene_02831.t1,gene_07890.t1,gene_01292.t1,gene_06988.t1,gene_07021.t1,gene_03769.t1,gene_09762.t1,gene_02623.t1,gene_00291.t1,gene_04573.t1,gene_08079.t1,gene_00762.t1,gene_01294.t1,gene_09523.t1,gene_01630.t1,gene_02720.t1,gene_10593.t1,gene_02091.t1,gene_06408.t1,gene_00487.t1,gene_07453.t1,gene_09041.t1,gene_10024.t1,gene_01300.t1,gene_04337.t1,gene_00326.t1,gene_08354.t1,gene_05695.t1,gene_10404.t1,gene_08483.t1,gene_08668.t1,gene_04419.t1,gene_07761.t1,gene_05963.t1,gene_07836.t1,gene_07066.t1,gene_04497.t1,gene_00766.t1,gene_04246.t1,gene_10122.t1,gene_06715.t1,gene_09296.t1,gene_04293.t1,gene_01550.t1,gene_05579.t1,gene_07110.t1,gene_04266.t1,gene_00805.t1,gene_01334.t1,gene_07116.t1,gene_07887.t1,gene_04769.t1,gene_08991.t1,gene_06339.t1,gene_00245.t1,gene_09797.t1,gene_04696.t1,gene_03101.t1,gene_02552.t1,gene_09120.t1,gene_02654.t1,gene_06540.t1,gene_06831.t1,gene_09148.t1, | | metal ion binding | molecular_function |

**Table S3 Detailed Gene Ontology (GO) classification of protein families in the genome of *P. paneum* OM1 (*Continued*)**

| **GO ID** | **Seq Num** | | **Seq List** | **GO term** | **Category** |
| --- | --- | --- | --- | --- | --- |
| GO:0046872 | 397 | gene_08521.t1,gene_06270.t1,gene_07377.t1,gene_01441.t1,gene_03979.t1,gene_08289.t1,gene_04093.t1,gene_00043.t1,gene_00012.t1,gene_07115.t1,gene_01946.t1,gene_03397.t1,gene_06429.t1,gene_01558.t1,gene_07477.t1,gene_02185.t1,gene_02251.t1,gene_06098.t1,gene_08162.t1,gene_04813.t1,gene_00147.t1,gene_03391.t1,gene_06236.t1,gene_02617.t1,gene_01210.t1,gene_06832.t1,gene_08595.t1,gene_01254.t1,gene_01074.t1,gene_07184.t1,gene_06655.t1,gene_01874.t1,gene_06856.t1,gene_09531.t1,gene_09862.t1,gene_08874.t1,gene_01504.t1,gene_08040.t1,gene_06743.t1,gene_01705.t1,gene_01521.t1,gene_05348.t1,gene_06162.t1,gene_09952.t1,gene_09071.t1,gene_06309.t1,gene_01523.t1,gene_02685.t1,gene_09528.t1,gene_04667.t1,gene_05593.t1,gene_02122.t1,gene_05218.t1,gene_07892.t1,gene_09324.t1,gene_10607.t1,gene_06433.t1,gene_03322.t1,gene_09824.t1,gene_03691.t1,gene_05535.t1,gene_06882.t1,gene_06168.t1,gene_01473.t1,gene_04609.t1,gene_01808.t1,gene_01280.t1,gene_06740.t1,gene_07315.t1,gene_09478.t1,gene_08724.t1,gene_00631.t1,gene_08511.t1,gene_04624.t1,gene_03475.t1,gene_09832.t1,gene_01852.t1,gene_07386.t1,gene_01197.t1,gene_05365.t1,gene_03751.t1,gene_02565.t1,gene_10355.t1,gene_10479.t1,gene_10000.t1,gene_09666.t1,gene_00074.t1,gene_08170.t1,gene_08015.t1,gene_02686.t1,gene_00717.t1,gene_03866.t1,gene_02974.t1,gene_08185.t1,gene_09601.t1,gene_05150.t1,gene_00029.t1,gene_10613.t1,gene_02703.t1,gene_09414.t1,gene_00055.t1,gene_05011.t1,gene_05483.t1,gene_02136.t1,gene_09542.t1,gene_06370.t1,gene_08827.t1,gene_00406.t1,gene_06718.t1,gene_07325.t1,gene_01707.t1,gene_08568.t1,gene_08464.t1,gene_01716.t1,gene_06995.t1,gene_10161.t1,gene_01343.t1,gene_06323.t1,gene_10345.t1,gene_01703.t1,gene_00338.t1,gene_08299.t1,gene_01409.t1,gene_06471.t1,gene_03449.t1,gene_09702.t1,gene_00944.t1,gene_01839.t1,gene_06255.t1,gene_09629.t1,gene_03112.t1,gene_02643.t1,gene_06455.t1,gene_05765.t1,gene_01715.t1,gene_00538.t1,gene_03227.t1,gene_03604.t1,gene_00512.t1,gene_03746.t1,gene_02038.t1,gene_07429.t1,gene_00302.t1,gene_00832.t1,gene_09990.t1,gene_01181.t1,gene_08300.t1,gene_01284.t1,gene_10039.t1,gene_08534.t1,gene_02387.t1,gene_00510.t1,gene_01393.t1,gene_03810.t1,gene_08559.t1,gene_04083.t1,gene_06475.t1,gene_07773.t1,gene_10263.t1,gene_00430.t1,gene_07979.t1,gene_02586.t1,gene_01066.t1,gene_03685.t1,gene_01128.t1,gene_07015.t1,gene_08910.t1,gene_07736.t1,gene_04647.t1,gene_06143.t1,gene_09266.t1,gene_04109.t1,gene_06940.t1,gene_03414.t1,gene_04173.t1,gene_03617.t1,gene_05217.t1,gene_04329.t1,gene_03807.t1,gene_03750.t1, | | metal ion binding | molecular_function |

**Table S3 Detailed Gene Ontology (GO) classification of protein families in the genome of *P. paneum* OM1 (*Continued*)**

| **GO ID** | **Seq Num** | | **Seq List** | **GO term** | **Category** |
| --- | --- | --- | --- | --- | --- |
| GO:0046872 | 397 | gene_03809.t1,gene_07851.t1,gene_02110.t1,gene_09250.t1,gene_02268.t1,gene_08076.t1,gene_00013.t1,gene_00949.t1,gene_03406.t1,gene_04244.t1,gene_05585.t1,gene_02476.t1,gene_06598.t1,gene_07290.t1,gene_05846.t1,gene_04202.t1,gene_10491.t1,gene_06077.t1,gene_02175.t1,gene_05978.t1,gene_04241.t1,gene_07978.t1,gene_09195.t1,gene_03326.t1,gene_04178.t1,gene_02331.t1,gene_06049.t1,gene_08159.t1,gene_01374.t1,gene_03957.t1,gene_09462.t1,gene_07625.t1,gene_02123.t1,gene_08361.t1,gene_08412.t1,gene_05871.t1,gene_10433.t1,gene_02713.t1,gene_01513.t1,gene_08193.t1,gene_05793.t1,gene_03008.t1,gene_08152.t1,gene_04509.t1,gene_05364.t1,gene_03654.t1,gene_08191.t1,gene_01243.t1,gene_06163.t1,gene_01018.t1,gene_02503.t1,gene_01840.t1,gene_10167.t1,gene_08455.t1,gene_04413.t1,gene_01472.t1,gene_03353.t1,gene_07889.t1,gene_09269.t1,gene_01933.t1,gene_05493.t1,gene_09189.t1,gene_06842.t1,gene_02927.t1,gene_01046.t1,gene_09097.t1,gene_09260.t1,gene_00621.t1,gene_03643.t1,gene_08431.t1,gene_00418.t1,gene_01855.t1,gene_10287.t1,gene_05170.t1,gene_02272.t1,gene_02312.t1,gene_04118.t1,gene_05363.t1,gene_07522.t1,gene_03882.t1,gene_06771.t1,gene_06709.t1,gene_00972.t1,gene_08058.t1,gene_02452.t1,gene_06827.t1,gene_06397.t1,gene_04236.t1,gene_05706.t1,gene_01131.t1,gene_05792.t1,gene_01838.t1,gene_02270.t1,gene_05686.t1,gene_06253.t1,gene_08107.t1,gene_01020.t1,gene_03394.t1,gene_07825.t1,gene_04634.t1,gene_06627.t1,gene_02830.t1 | | metal ion binding | molecular_function |
| GO:0004013 | 1 | gene_05443.t1 | | adenosylhomocysteinase activity | molecular_function |
| GO:0004014 | 1 | gene_08168.t1 | | adenosylmethionine decarboxylase activity | molecular_function |
| GO:0003916 | 1 | gene_00205.t1 | | DNA topoisomerase activity | molecular_function |
| GO:0016757 | 45 | gene_08315.t1,gene_07807.t1,gene_05801.t1,gene_06425.t1,gene_03767.t1,gene_05724.t1,gene_01691.t1,gene_04005.t1,gene_00571.t1,gene_08478.t1,gene_06904.t1,gene_07300.t1,gene_09608.t1,gene_02938.t1,gene_09213.t1,gene_08132.t1,gene_10106.t1,gene_01064.t1,gene_10315.t1,gene_06898.t1,gene_09242.t1,gene_05221.t1,gene_10127.t1,gene_03572.t1,gene_07018.t1,gene_08128.t1,gene_02758.t1,gene_00661.t1,gene_01248.t1,gene_09836.t1,gene_00090.t1,gene_04474.t1,gene_04493.t1,gene_00134.t1,gene_05140.t1,gene_07375.t1,gene_01098.t1,gene_06265.t1,gene_05692.t1,gene_02369.t1,gene_04094.t1,gene_02964.t1,gene_06281.t1,gene_10012.t1,gene_03124.t1 | | glycosyltransferase activity | molecular_function |
| GO:0016758 | 4 | gene_00199.t1,gene_03481.t1,gene_07845.t1,gene_07540.t1 | | hexosyltransferase activity | molecular_function |
| GO:0000993 | 1 | gene_04188.t1 | | RNA polymerase II complex binding | molecular_function |

**Table S3 Detailed Gene Ontology (GO) classification of protein families in the genome of *P. paneum* OM1 (*Continued*)**

| **GO ID** | **Seq Num** | | **Seq List** | **GO term** | **Category** |
| --- | --- | --- | --- | --- | --- |
| GO:0000995 | 1 | gene_03056.t1 | | RNA polymerase III general transcription initiation factor activity | molecular_function |
| GO:0003910 | 4 | gene_05677.t1,gene_07821.t1,gene_01043.t1,gene_05811.t1 | | DNA ligase (ATP) activity | molecular_function |
| GO:0033897 | 2 | gene_05684.t1,gene_01869.t1 | | ribonuclease T2 activity | molecular_function |
| GO:0042393 | 3 | gene_07532.t1,gene_05665.t1,gene_08023.t1 | | histone binding | molecular_function |
| GO:0061711 | 2 | gene_04246.t1,gene_09601.t1 | | N(6)-L-threonylcarbamoyladenine synthase activity | molecular_function |
| GO:0106364 | 1 | gene_10412.t1 | | 4-hydroxy-3-all-trans-hexaprenylbenzoate oxygenase activity | molecular_function |
| GO:0003854 | 4 | gene_02639.t1,gene_07798.t1,gene_00026.t1,gene_02494.t1 | | 3-beta-hydroxy-delta5-steroid dehydrogenase activity | molecular_function |
| GO:0047389 | 2 | gene_05869.t1,gene_05485.t1 | | glycerophosphocholine phosphodiesterase activity | molecular_function |
| GO:0003676 | 136 | gene_04241.t1,gene_06318.t1,gene_03242.t1,gene_00613.t1,gene_10474.t1,gene_00005.t1,gene_03583.t1,gene_07444.t1,gene_10377.t1,gene_10402.t1,gene_02841.t1,gene_04777.t1,gene_06202.t1,gene_03074.t1,gene_01097.t1,gene_05819.t1,gene_00318.t1,gene_10492.t1,gene_03372.t1,gene_10212.t1,gene_06245.t1,gene_03026.t1,gene_05035.t1,gene_05055.t1,gene_02360.t1,gene_06902.t1,gene_04955.t1,gene_10383.t1,gene_07715.t1,gene_02203.t1,gene_04895.t1,gene_03834.t1,gene_09756.t1,gene_06028.t1,gene_02480.t1,gene_08063.t1,gene_00897.t1,gene_03790.t1,gene_08291.t1,gene_05233.t1,gene_00875.t1,gene_00166.t1,gene_03702.t1,gene_03855.t1,gene_03654.t1,gene_02998.t1,gene_07852.t1,gene_08484.t1,gene_03494.t1,gene_00284.t1,gene_01990.t1,gene_08388.t1,gene_06329.t1,gene_00845.t1,gene_00363.t1,gene_06649.t1,gene_01826.t1,gene_07355.t1,gene_05004.t1,gene_00597.t1,gene_04116.t1,gene_05002.t1,gene_04909.t1,gene_09857.t1,gene_00412.t1,gene_06488.t1,gene_07853.t1,gene_04978.t1,gene_04788.t1,gene_03950.t1,gene_07356.t1,gene_06050.t1,gene_01532.t1,gene_10176.t1,gene_08342.t1,gene_02077.t1,gene_05909.t1,gene_04921.t1,gene_04505.t1,gene_06611.t1,gene_04404.t1,gene_07500.t1,gene_08273.t1,gene_01636.t1,gene_01295.t1,gene_01093.t1,gene_05314.t1,gene_01066.t1,gene_10208.t1,gene_03638.t1,gene_09569.t1,gene_09843.t1,gene_06360.t1,gene_10246.t1,gene_01706.t1,gene_07129.t1,gene_09715.t1,gene_04776.t1,gene_06256.t1,gene_04960.t1,gene_09823.t1,gene_04971.t1,gene_03892.t1,gene_00001.t1,gene_07364.t1,gene_03686.t1,gene_10576.t1,gene_08924.t1,gene_09851.t1,gene_04884.t1,  gene_01162.t1,gene_05855.t1,gene_06073.t1,gene_00768.t1,gene_01828.t1,  gene_02049.t1,gene_04448.t1,gene_04174.t1,gene_07402.t1,gene_08391.t1, | | nucleic acid binding | molecular_function |

**Table S3 Detailed Gene Ontology (GO) classification of protein families in the genome of *P. paneum* OM1 (*Continued*)**

| **GO ID** | **Seq Num** | | **Seq List** | **GO term** | **Category** |
| --- | --- | --- | --- | --- | --- |
| GO:0003676 | 136 | gene_07819.t1,gene_04075.t1,gene_07680.t1,gene_00011.t1,gene_02253.t1,gene_03157.t1,gene_04293.t1,gene_05659.t1,gene_08276.t1,gene_07716.t1,gene_01182.t1,gene_05388.t1,gene_00977.t1,gene_05426.t1,gene_07659.t1,gene_01762.t1 | | nucleic acid binding | molecular_function |
| GO:0008375 | 5 | gene_10658.t1,gene_05113.t1,gene_04805.t1,gene_04999.t1,gene_01969.t1 | | acetylglucosaminyltransferase activity | molecular_function |
| GO:0003678 | 15 | gene_00515.t1,gene_02991.t1,gene_01710.t1,gene_01540.t1,gene_07862.t1,gene_04537.t1,gene_02228.t1,gene_02715.t1,gene_00363.t1,gene_07321.t1,gene_09071.t1,gene_09891.t1,gene_09591.t1,gene_07906.t1,gene_08245.t1 | | DNA helicase activity | molecular_function |
| GO:0046523 | 1 | gene_02356.t1 | | S-methyl-5-thioribose-1-phosphate isomerase activity | molecular_function |
| GO:0030272 | 1 | gene_09195.t1 | | 5-formyltetrahydrofolate cyclo-ligase activity | molecular_function |
| GO:0047657 | 4 | gene_04297.t1,gene_07022.t1,gene_05380.t1,gene_04526.t1 | | alpha-1,3-glucan synthase activity | molecular_function |
| GO:0030276 | 4 | gene_07272.t1,gene_02601.t1,gene_06752.t1,gene_00554.t1 | | clathrin binding | molecular_function |
| GO:0097159 | 2 | gene_03800.t1,gene_00746.t1 | | organic cyclic compound binding | molecular_function |
| GO:0052909 | 1 | gene_09916.t1 | | 18S rRNA (adenine(1779)-N(6)/adenine(1780)-N(6))-dimethyltransferase activity | molecular_function |
| GO:0017025 | 3 | gene_03056.t1,gene_02523.t1,gene_03014.t1 | | TBP-class protein binding | molecular_function |
| GO:0017022 | 1 | gene_01660.t1 | | myosin binding | molecular_function |
| GO:0042577 | 4 | gene_02872.t1,gene_00809.t1,gene_07679.t1,gene_05347.t1 | | lipid phosphatase activity | molecular_function |
| GO:0097027 | 3 | gene_09995.t1,gene_02100.t1,gene_07199.t1 | | ubiquitin-protein transferase activator activity | molecular_function |
| GO:0097020 | 1 | gene_02368.t1 | | COPII receptor activity | molecular_function |
| GO:0003690 | 3 | gene_08595.t1,gene_05469.t1,gene_02751.t1 | | double-stranded DNA binding | molecular_function |
| GO:0003697 | 11 | gene_00455.t1,gene_02617.t1,gene_04551.t1,gene_06097.t1,gene_05469.t1,gene_02995.t1,gene_08595.t1,gene_06339.t1,gene_10392.t1,gene_04203.t1,gene_00867.t1 | | single-stranded DNA binding | molecular_function |
| GO:0061981 | 2 | gene_00551.t1,gene_04082.t1 | | 3-hydroxykynureninase activity | molecular_function |
| GO:0004864 | 1 | gene_08172.t1 | | protein phosphatase inhibitor activity | molecular_function |
| GO:0004865 | 1 | gene_05153.t1 | | protein serine/threonine phosphatase inhibitor activity | molecular_function |
| GO:0004866 | 1 | gene_06474.t1 | | endopeptidase inhibitor activity | molecular_function |
| GO:0047938 | 1 | gene_02885.t1 | | glucose-6-phosphate 1-epimerase activity | molecular_function |
| GO:0004512 | 1 | gene_00961.t1 | | inositol-3-phosphate synthase activity | molecular_function |
| GO:0103025 | 3 | gene_04296.t1,gene_05379.t1,gene_04047.t1 | | alpha-amylase activity | molecular_function |

**Table S3 Detailed Gene Ontology (GO) classification of protein families in the genome of *P. paneum* OM1 (*Continued*)**

| **GO ID** | **Seq Num** | | **Seq List** | **GO term** | **Category** |
| --- | --- | --- | --- | --- | --- |
| GO:0106322 | 1 | gene_00963.t1 | | S-(hydroxymethyl)glutathione dehydrogenase NAD activity | molecular_function |
| GO:0004515 | 1 | gene_03849.t1 | | nicotinate-nucleotide adenylyltransferase activity | molecular_function |
| GO:0004516 | 1 | gene_04641.t1 | | nicotinate phosphoribosyltransferase activity | molecular_function |
| GO:0106321 | 1 | gene_00963.t1 | | S-(hydroxymethyl)glutathione dehydrogenase NADP activity | molecular_function |
| GO:0004518 | 5 | gene_09781.t1,gene_05791.t1,gene_09338.t1,gene_05747.t1,gene_09702.t1 | | nuclease activity | molecular_function |
| GO:0004519 | 21 | gene_06477.t1,gene_04510.t1,gene_07978.t1,gene_02617.t1,gene_02939.t1,gene_07270.t1,gene_09922.t1,gene_04548.t1,gene_09684.t1,gene_07789.t1,gene_08535.t1,gene_03737.t1,gene_03583.t1,gene_04176.t1,gene_01066.t1,gene_06444.t1,gene_01020.t1,gene_09105.t1,gene_02565.t1,gene_05910.t1,gene_04293.t1 | | endonuclease activity | molecular_function |
| GO:0001228 | 3 | gene_09058.t1,gene_02408.t1,gene_10265.t1 | | DNA-binding transcription activator activity, RNA polymerase II-specific | molecular_function |
| GO:0036381 | 1 | gene_04580.t1 | | pyridoxal 5'-phosphate synthase (glutamine hydrolysing) activity | molecular_function |
| GO:0005200 | 3 | gene_00668.t1,gene_00015.t1,gene_08913.t1 | | structural constituent of cytoskeleton | molecular_function |
| GO:0004640 | 1 | gene_08809.t1 | | phosphoribosylanthranilate isomerase activity | molecular_function |
| GO:0030729 | 3 | gene_08667.t1,gene_10584.t1,gene_00969.t1 | | acetoacetate-CoA ligase activity | molecular_function |
| GO:0102265 | 3 | gene_02091.t1,gene_06558.t1,gene_07216.t1 | | tRNA-dihydrouridine47 synthase activity | molecular_function |
| GO:0004467 | 1 | gene_02649.t1 | | long-chain fatty acid-CoA ligase activity | molecular_function |
| GO:0004462 | 1 | gene_03769.t1 | | lactoylglutathione lyase activity | molecular_function |
| GO:0008972 | 1 | gene_00596.t1 | | phosphomethylpyrimidine kinase activity | molecular_function |
| GO:0008757 | 2 | gene_07733.t1,gene_10340.t1 | | S-adenosylmethionine-dependent methyltransferase activity | molecular_function |
| GO:0008977 | 1 | gene_00560.t1 | | prephenate dehydrogenase (NAD+) activity | molecular_function |
| GO:0008198 | 3 | gene_05541.t1,gene_00790.t1,gene_07394.t1 | | ferrous iron binding | molecular_function |
| GO:0008199 | 5 | gene_02569.t1,gene_09653.t1,gene_06959.t1,gene_09989.t1,gene_02177.t1 | | ferric iron binding | molecular_function |
| GO:0102867 | 1 | gene_02844.t1 | | molybdenum cofactor sulfurtransferase activity | molecular_function |
| GO:0008193 | 1 | gene_02115.t1 | | tRNA guanylyltransferase activity | molecular_function |
| GO:0008194 | 6 | gene_00199.t1,gene_07177.t1,gene_03481.t1,gene_07845.t1,gene_07540.t1,gene_09691.t1 | | UDP-glycosyltransferase activity | molecular_function |
| GO:0004648 | 1 | gene_09692.t1 | | O-phospho-L-serine:2-oxoglutarate aminotransferase activity | molecular_function |

**Table S3 Detailed Gene Ontology (GO) classification of protein families in the genome of *P. paneum* OM1 (*Continued*)**

| **GO ID** | **Seq Num** | | **Seq List** | **GO term** | **Category** |
| --- | --- | --- | --- | --- | --- |
| GO:0004649 | 1 | gene_02243.t1 | | poly(ADP-ribose) glycohydrolase activity | molecular_function |
| GO:0004641 | 1 | gene_09629.t1 | | phosphoribosylformylglycinamidine cyclo-ligase activity | molecular_function |
| GO:0004642 | 1 | gene_08162.t1 | | phosphoribosylformylglycinamidine synthase activity | molecular_function |
| GO:0004643 | 1 | gene_00429.t1 | | phosphoribosylaminoimidazolecarboxamide formyltransferase activity | molecular_function |
| GO:0045127 | 2 | gene_08150.t1,gene_03440.t1 | | N-acetylglucosamine kinase activity | molecular_function |
| GO:0102193 | 2 | gene_07564.t1,gene_04104.t1 | | protein-ribulosamine 3-kinase activity | molecular_function |
| GO:0000175 | 2 | gene_03242.t1,gene_03026.t1 | | 3'-5'-exoribonuclease activity | molecular_function |
| GO:0004888 | 2 | gene_00670.t1,gene_04229.t1 | | transmembrane signaling receptor activity | molecular_function |
| GO:0008479 | 2 | gene_01300.t1,gene_07887.t1 | | queuine tRNA-ribosyltransferase activity | molecular_function |
| GO:0008022 | 1 | gene_06332.t1 | | protein C-terminus binding | molecular_function |
| GO:0008379 | 2 | gene_03631.t1,gene_02909.t1 | | thioredoxin peroxidase activity | molecular_function |
| GO:0008374 | 8 | gene_08056.t1,gene_03250.t1,gene_05956.t1,gene_08886.t1,gene_02539.t1,gene_01208.t1,gene_07175.t1,gene_06453.t1 | | O-acyltransferase activity | molecular_function |
| GO:0003855 | 5 | gene_09377.t1,gene_05125.t1,gene_05587.t1,gene_02251.t1,gene_05589.t1 | | 3-dehydroquinate dehydratase activity | molecular_function |
| GO:0003856 | 1 | gene_02251.t1 | | 3-dehydroquinate synthase activity | molecular_function |
| GO:0003852 | 1 | gene_06642.t1 | | 2-isopropylmalate synthase activity | molecular_function |
| GO:0016538 | 6 | gene_04586.t1,gene_06207.t1,gene_04459.t1,gene_09737.t1,gene_04102.t1,gene_08654.t1 | | cyclin-dependent protein serine/threonine kinase regulator activity | molecular_function |
| GO:0036361 | 1 | gene_08759.t1 | | racemase activity, acting on amino acids and derivatives | molecular_function |
| GO:0008143 | 2 | gene_03979.t1,gene_05249.t1 | | poly(A) binding | molecular_function |
| GO:0003988 | 4 | gene_07030.t1,gene_10028.t1,gene_10634.t1,gene_06029.t1 | | acetyl-CoA C-acyltransferase activity | molecular_function |
| GO:0003989 | 1 | gene_01074.t1 | | acetyl-CoA carboxylase activity | molecular_function |
| GO:0003986 | 1 | gene_00257.t1 | | acetyl-CoA hydrolase activity | molecular_function |
| GO:0003987 | 1 | gene_10043.t1 | | acetate-CoA ligase activity | molecular_function |
| GO:0004088 | 2 | gene_06540.t1,gene_08081.t1 | | carbamoyl-phosphate synthase (glutamine-hydrolyzing) activity | molecular_function |
| GO:0004089 | 3 | gene_10073.t1,gene_03587.t1,gene_04635.t1 | | carbonate dehydratase activity | molecular_function |
| GO:0003983 | 1 | gene_04652.t1 | | UTP:glucose-1-phosphate uridylyltransferase activity | molecular_function |
| GO:0003980 | 1 | gene_03162.t1 | | UDP-glucose:glycoprotein glucosyltransferase activity | molecular_function |

**Table S3 Detailed Gene Ontology (GO) classification of protein families in the genome of *P. paneum* OM1 (*Continued*)**

| **GO ID** | **Seq Num** | | **Seq List** | **GO term** | **Category** |
| --- | --- | --- | --- | --- | --- |
| GO:0016531 | 2 | gene_06931.t1,gene_06951.t1 | | copper chaperone activity | molecular_function |
| GO:0015099 | 1 | gene_01059.t1 | | nickel cation transmembrane transporter activity | molecular_function |
| GO:0015098 | 1 | gene_07072.t1 | | molybdate ion transmembrane transporter activity | molecular_function |
| GO:0015095 | 6 | gene_04463.t1,gene_03336.t1,gene_09232.t1,gene_00892.t1,gene_01165.t1,gene_02031.t1 | | magnesium ion transmembrane transporter activity | molecular_function |
| GO:0016614 | 20 | gene_03385.t1,gene_09799.t1,gene_09802.t1,gene_00472.t1,gene_07061.t1,gene_09761.t1,gene_08251.t1,gene_05272.t1,gene_05482.t1,gene_01077.t1,gene_10298.t1,gene_10471.t1,gene_09950.t1,gene_04408.t1,gene_01974.t1,gene_03728.t1,gene_09906.t1,gene_09805.t1,gene_04382.t1,gene_00546.t1 | | oxidoreductase activity, acting on CH-OH group of donors | molecular_function |
| GO:0051213 | 53 | gene_07074.t1,gene_05732.t1,gene_00763.t1,gene_04074.t1,gene_05911.t1,gene_00181.t1,gene_06957.t1,gene_08152.t1,gene_07543.t1,gene_09114.t1,gene_00457.t1,gene_04443.t1,gene_01975.t1,gene_03774.t1,gene_03106.t1,gene_04373.t1,gene_06877.t1,gene_08672.t1,gene_00013.t1,gene_07708.t1,gene_09095.t1,gene_09120.t1,gene_09148.t1,gene_04751.t1,gene_04677.t1,gene_04083.t1,gene_06521.t1,gene_09199.t1,gene_03358.t1,gene_07830.t1,gene_05792.t1,gene_09788.t1,gene_01499.t1,gene_06460.t1,gene_05541.t1,gene_07152.t1,gene_08361.t1,gene_05931.t1,gene_01495.t1,gene_03126.t1,gene_06967.t1,gene_07228.t1,gene_09493.t1,gene_07319.t1,gene_05864.t1,gene_00790.t1,gene_01808.t1,gene_09494.t1,gene_08658.t1,gene_05930.t1,gene_02942.t1,gene_01810.t1,gene_02845.t1 | | dioxygenase activity | molecular_function |
| GO:0016616 | 19 | gene_05973.t1,gene_06470.t1,gene_09792.t1,gene_02634.t1,gene_07479.t1,gene_01335.t1,gene_02157.t1,gene_08580.t1,gene_10214.t1,gene_06021.t1,gene_10236.t1,gene_01609.t1,gene_07689.t1,gene_06137.t1,gene_07063.t1,gene_09683.t1,gene_06599.t1,gene_08826.t1,gene_02167.t1 | | oxidoreductase activity, acting on the CH-OH group of donors, NAD or NADP as acceptor | molecular_function |
| GO:0008408 | 3 | gene_09857.t1,gene_06318.t1,gene_06050.t1 | | 3'-5' exonuclease activity | molecular_function |
| GO:0008409 | 1 | gene_07283.t1 | | 5'-3' exonuclease activity | molecular_function |
| GO:0016765 | 5 | gene_10116.t1,gene_02343.t1,gene_04197.t1,gene_05126.t1,gene_00782.t1 | | transferase activity, transferring alkyl or aryl (other than methyl) groups | molecular_function |
| GO:0019239 | 6 | gene_08778.t1,gene_09473.t1,gene_01224.t1,gene_10457.t1,gene_08641.t1,gene_08293.t1 | | deaminase activity | molecular_function |
| GO:0106222 | 1 | gene_05249.t1 | | lncRNA binding | molecular_function |
| GO:0000987 | 1 | gene_00891.t1 | | cis-regulatory region sequence-specific DNA binding | molecular_function |
| GO:0015140 | 3 | gene_01317.t1,gene_07390.t1,gene_07391.t1 | | malate transmembrane transporter activity | molecular_function |
| GO:0050113 | 2 | gene_01340.t1,gene_00527.t1 | | inositol oxygenase activity | molecular_function |

**Table S3 Detailed Gene Ontology (GO) classification of protein families in the genome of *P. paneum* OM1 (*Continued*)**

| **GO ID** | **Seq Num** | | **Seq List** | **GO term** | **Category** |
| --- | --- | --- | --- | --- | --- |
| GO:0004694 | 1 | gene_08078.t1 | | eukaryotic translation initiation factor 2alpha kinase activity | molecular_function |
| GO:0019237 | 1 | gene_04179.t1 | | centromeric DNA binding | molecular_function |
| GO:0000981 | 340 | gene_03118.t1,gene_02220.t1,gene_02526.t1,gene_07639.t1,gene_06503.t1,gene_04976.t1,gene_03130.t1,gene_10151.t1,gene_04257.t1,gene_00286.t1,gene_00732.t1,gene_06585.t1,gene_05301.t1,gene_09549.t1,gene_03018.t1,gene_03606.t1,gene_07166.t1,gene_06706.t1,gene_04378.t1,gene_01987.t1,gene_04263.t1,gene_08694.t1,gene_04651.t1,gene_04014.t1,gene_04706.t1,gene_10237.t1,gene_00182.t1,gene_08824.t1,gene_03062.t1,gene_09457.t1,gene_04873.t1,gene_02977.t1,gene_02297.t1,gene_05808.t1,gene_08345.t1,gene_01692.t1,gene_05311.t1,gene_07128.t1,gene_03228.t1,gene_00556.t1,gene_06258.t1,gene_01305.t1,gene_07284.t1,gene_05527.t1,gene_03248.t1,gene_02170.t1,gene_07241.t1,gene_03295.t1,gene_06020.t1,gene_09813.t1,gene_01948.t1,gene_00908.t1,gene_08441.t1,gene_06225.t1,gene_04045.t1,gene_09339.t1,gene_08254.t1,gene_01145.t1,gene_06978.t1,gene_05273.t1,gene_03447.t1,gene_09375.t1,gene_06395.t1,gene_03513.t1,gene_09814.t1,gene_05277.t1,gene_06934.t1,gene_02808.t1,gene_05121.t1,gene_03050.t1,gene_00562.t1,gene_04918.t1,gene_02847.t1,gene_06532.t1,gene_02034.t1,gene_03831.t1,gene_09930.t1,gene_04979.t1,gene_07827.t1,gene_08560.t1,gene_01153.t1,gene_04481.t1,gene_09656.t1,gene_04937.t1,gene_07168.t1,gene_02946.t1,gene_09957.t1,gene_01809.t1,gene_05721.t1,gene_02948.t1,gene_10543.t1,gene_04650.t1,gene_06088.t1,gene_02605.t1,gene_05540.t1,gene_00052.t1,gene_03342.t1,gene_00959.t1,gene_00308.t1,gene_03366.t1,gene_07677.t1,gene_01887.t1,gene_00564.t1,gene_04041.t1,gene_02809.t1,gene_06852.t1,gene_09809.t1,gene_04022.t1,gene_04081.t1,gene_08155.t1,gene_01527.t1,gene_06732.t1,gene_06614.t1,gene_05950.t1,gene_06402.t1,gene_03132.t1,gene_08477.t1,gene_02916.t1,gene_10058.t1,gene_10254.t1,gene_01612.t1,gene_06584.t1,gene_01394.t1,gene_06795.t1,gene_10553.t1,gene_07693.t1,gene_01922.t1,gene_05736.t1,gene_04208.t1,gene_09537.t1,gene_07635.t1,gene_09878.t1,gene_07088.t1,gene_01937.t1,gene_05474.t1,gene_02318.t1,gene_01345.t1,gene_09126.t1,gene_04048.t1,gene_04028.t1,gene_05383.t1,gene_07085.t1,gene_10666.t1,gene_09370.t1,gene_04695.t1,gene_04627.t1,gene_04473.t1,gene_04676.t1,gene_07382.t1,gene_07955.t1,gene_06230.t1,gene_05517.t1,gene_08083.t1,gene_08638.t1,gene_10051.t1,gene_10211.t1,gene_07948.t1,gene_06089.t1,gene_06606.t1,gene_00614.t1,gene_01535.t1,gene_03812.t1,gene_02107.t1,gene_01135.t1,gene_02385.t1,gene_08947.t1,gene_00822.t1,gene_00640.t1,gene_00395.t1,gene_07583.t1, | | DNA-binding transcription factor activity, RNA polymerase II-specific | molecular_function |

**Table S3 Detailed Gene Ontology (GO) classification of protein families in the genome of *P. paneum* OM1 (*Continued*)**

| **GO ID** | **Seq Num** | | **Seq List** | **GO term** | **Category** |
| --- | --- | --- | --- | --- | --- |
| GO:0000981 | 340 | gene_03770.t1,gene_09652.t1,gene_02580.t1,gene_01819.t1,gene_02151.t1,gene_06679.t1,gene_01512.t1,gene_02652.t1,gene_02786.t1,gene_09590.t1,gene_05080.t1,gene_03761.t1,gene_04013.t1,gene_04515.t1,gene_02282.t1,gene_10255.t1,gene_03463.t1,gene_06059.t1,gene_05932.t1,gene_08135.t1,gene_03650.t1,gene_04594.t1,gene_08833.t1,gene_04621.t1,gene_10663.t1,gene_00046.t1,gene_08041.t1,gene_04732.t1,gene_02874.t1,gene_05299.t1,gene_02529.t1,gene_02607.t1,gene_07537.t1,gene_01756.t1,gene_10629.t1,gene_05595.t1,gene_06672.t1,gene_07683.t1,gene_08569.t1,gene_01742.t1,gene_06249.t1,gene_03763.t1,gene_00921.t1,gene_02757.t1,gene_08608.t1,gene_03655.t1,gene_08550.t1,gene_02050.t1,gene_10083.t1,gene_05725.t1,gene_09939.t1,gene_06172.t1,gene_10374.t1,gene_05082.t1,gene_02042.t1,gene_06023.t1,gene_06515.t1,gene_01498.t1,gene_09646.t1,gene_07548.t1,gene_02512.t1,gene_00803.t1,gene_01262.t1,gene_02608.t1,gene_05588.t1,gene_01529.t1,gene_00747.t1,gene_01321.t1,gene_02502.t1,gene_09131.t1,gene_06377.t1,gene_01359.t1,gene_07785.t1,gene_00847.t1,gene_03869.t1,gene_06766.t1,gene_04903.t1,gene_08366.t1,gene_03427.t1,gene_08148.t1,gene_09897.t1,gene_04524.t1,gene_09526.t1,gene_09330.t1,gene_05547.t1,gene_07320.t1,gene_01857.t1,gene_05559.t1,gene_03741.t1,gene_09969.t1,gene_08703.t1,gene_04693.t1,gene_01156.t1,gene_06095.t1,gene_09035.t1,gene_08280.t1,gene_03747.t1,gene_07229.t1,gene_06823.t1,gene_05070.t1,gene_03642.t1,gene_02068.t1,gene_10614.t1,gene_01377.t1,gene_02086.t1,gene_02027.t1,gene_02321.t1,gene_01730.t1,gene_01134.t1,gene_10509.t1,gene_01708.t1,gene_04946.t1,gene_05206.t1,gene_03607.t1,gene_06936.t1,gene_09361.t1,gene_04830.t1,gene_06675.t1,gene_07726.t1,gene_10498.t1,gene_05087.t1,gene_10172.t1,gene_09865.t1,gene_05814.t1,gene_02178.t1,gene_01774.t1,gene_02661.t1,gene_00770.t1,gene_03408.t1,gene_10056.t1,gene_10205.t1,gene_08479.t1,gene_03870.t1,gene_03107.t1,gene_03304.t1,gene_07612.t1,gene_02677.t1,gene_01998.t1,gene_09748.t1,gene_03842.t1,gene_09460.t1,gene_04795.t1,gene_06963.t1,gene_03748.t1,gene_04854.t1,gene_09935.t1,gene_04307.t1,gene_09979.t1,gene_08139.t1,gene_03595.t1,gene_00891.t1,gene_05810.t1,gene_00059.t1,gene_03596.t1,gene_06040.t1,gene_10649.t1,gene_07040.t1,gene_01530.t1,gene_05972.t1,gene_07333.t1,gene_00656.t1,gene_05151.t1,gene_00634.t1,gene_00018.t1,gene_01954.t1,gene_02730.t1,gene_09697.t1,gene_03210.t1,gene_00968.t1,gene_07525.t1 | | DNA-binding transcription factor activity, RNA polymerase II-specific | molecular_function |
| GO:0004329 | 1 | gene_06799.t1 | | formate-tetrahydrofolate ligase activity | molecular_function |
| GO:0043399 | 1 | gene_04600.t1 | | tRNA A64-2'-O-ribosylphosphate transferase activity | molecular_function |

**Table S3 Detailed Gene Ontology (GO) classification of protein families in the genome of *P. paneum* OM1 (*Continued*)**

| **GO ID** | **Seq Num** | | **Seq List** | **GO term** | **Category** |
| --- | --- | --- | --- | --- | --- |
| GO:0015075 | 1 | gene_06626.t1 | | ion transmembrane transporter activity | molecular_function |
| GO:0051998 | 1 | gene_08076.t1 | | protein carboxyl O-methyltransferase activity | molecular_function |
| GO:0051996 | 2 | gene_04746.t1,gene_10502.t1 | | squalene synthase activity | molecular_function |
| GO:0035529 | 1 | gene_09266.t1 | | NADH pyrophosphatase activity | molecular_function |
| GO:0043175 | 1 | gene_00538.t1 | | RNA polymerase core enzyme binding | molecular_function |
| GO:0003689 | 1 | gene_07620.t1 | | DNA clamp loader activity | molecular_function |
| GO:0003682 | 5 | gene_03593.t1,gene_07314.t1,gene_05556.t1,gene_09822.t1,gene_01705.t1 | | chromatin binding | molecular_function |
| GO:0003684 | 13 | gene_09338.t1,gene_02991.t1,gene_10061.t1,gene_04537.t1,gene_09428.t1,gene_04737.t1,gene_03610.t1,gene_09214.t1,gene_07736.t1,gene_04239.t1,gene_10200.t1,gene_03712.t1,gene_08006.t1 | | damaged DNA binding | molecular_function |
| GO:0036424 | 1 | gene_06831.t1 | | L-phosphoserine phosphatase activity | molecular_function |
| GO:0000340 | 1 | gene_01012.t1 | | RNA 7-methylguanosine cap binding | molecular_function |
| GO:0051920 | 3 | gene_01515.t1,gene_02994.t1,gene_01846.t1 | | peroxiredoxin activity | molecular_function |
| GO:0001216 | 1 | gene_08925.t1 | | DNA-binding transcription activator activity | molecular_function |
| GO:0050661 | 38 | gene_03675.t1,gene_10513.t1,gene_06728.t1,gene_08137.t1,gene_08705.t1,gene_08768.t1,gene_06489.t1,gene_08570.t1,gene_05095.t1,gene_08426.t1,gene_05358.t1,gene_06860.t1,gene_01733.t1,gene_03823.t1,gene_08980.t1,gene_09331.t1,gene_02054.t1,gene_09021.t1,gene_09500.t1,gene_00932.t1,gene_06569.t1,gene_06816.t1,gene_08094.t1,gene_07722.t1,gene_02611.t1,gene_05553.t1,gene_05635.t1,gene_01216.t1,gene_06522.t1,gene_01430.t1,gene_01051.t1,gene_06491.t1,gene_07999.t1,gene_07897.t1,gene_10641.t1,gene_09431.t1,gene_07758.t1,gene_08675.t1 | | NADP binding | molecular_function |
| GO:0050660 | 68 | gene_08137.t1,gene_08181.t1,gene_04289.t1,gene_07897.t1,gene_08251.t1,gene_08705.t1,gene_06489.t1,gene_09802.t1,gene_00765.t1,gene_10298.t1,gene_02079.t1,gene_05095.t1,gene_09906.t1,gene_06475.t1,gene_08570.t1,gene_10513.t1,gene_09805.t1,gene_05482.t1,gene_01249.t1,gene_00546.t1,gene_08094.t1,gene_07523.t1,gene_06728.t1,gene_05272.t1,gene_04623.t1,gene_01733.t1,gene_04382.t1,gene_04134.t1,gene_01480.t1,gene_07137.t1,gene_09331.t1,gene_02054.t1,gene_03728.t1,gene_06311.t1,gene_07216.t1,gene_09021.t1,gene_09577.t1,gene_09500.t1,gene_00932.t1,gene_03385.t1,gene_08354.t1,gene_09950.t1,gene_00970.t1,gene_07061.t1,gene_09761.t1,gene_06558.t1,gene_09799.t1,gene_04541.t1,gene_05553.t1,gene_10471.t1,gene_06522.t1,gene_02091.t1,gene_08592.t1,gene_00472.t1,gene_08047.t1, | | flavin adenine dinucleotide binding | molecular_function |

**Table S3 Detailed Gene Ontology (GO) classification of protein families in the genome of *P. paneum* OM1 (*Continued*)**

| **GO ID** | **Seq Num** | | **Seq List** | **GO term** | **Category** |
| --- | --- | --- | --- | --- | --- |
| GO:0050660 | 68 | gene_06594.t1,gene_04708.t1,gene_03858.t1,gene_07285.t1,gene_07999.t1,gene_01077.t1,gene_10641.t1,gene_04408.t1,gene_01974.t1,gene_09431.t1,gene_06691.t1,gene_08675.t1,gene_08764.t1 | | flavin adenine dinucleotide binding | molecular_function |
| GO:0004502 | 1 | gene_02644.t1 | | kynurenine 3-monooxygenase activity | molecular_function |
| GO:0017136 | 1 | gene_09874.t1 | | NAD-dependent histone deacetylase activity | molecular_function |
| GO:0005053 | 1 | gene_01977.t1 | | peroxisome matrix targeting signal-2 binding | molecular_function |
| GO:1903425 | 1 | gene_06264.t1 | | fluoride transmembrane transporter activity | molecular_function |
| GO:0004108 | 1 | gene_04195.t1 | | citrate (Si)-synthase activity | molecular_function |
| GO:0008353 | 1 | gene_07367.t1 | | RNA polymerase II CTD heptapeptide repeat kinase activity | molecular_function |
| GO:0008986 | 1 | gene_06471.t1 | | pyruvate, water dikinase activity | molecular_function |
| GO:0004479 | 1 | gene_02437.t1 | | methionyl-tRNA formyltransferase activity | molecular_function |
| GO:0004478 | 1 | gene_05535.t1 | | methionine adenosyltransferase activity | molecular_function |
| GO:0004471 | 2 | gene_06433.t1,gene_01131.t1 | | malate dehydrogenase (decarboxylating) (NAD+) activity | molecular_function |
| GO:0004477 | 1 | gene_06799.t1 | | methenyltetrahydrofolate cyclohydrolase activity | molecular_function |
| GO:0004476 | 2 | gene_01454.t1,gene_08772.t1 | | mannose-6-phosphate isomerase activity | molecular_function |
| GO:0102210 | 2 | gene_02291.t1,gene_06586.t1 | | rhamnogalacturonan endolyase activity | molecular_function |
| GO:0004474 | 1 | gene_09444.t1 | | malate synthase activity | molecular_function |
| GO:0043295 | 1 | gene_08070.t1 | | glutathione binding | molecular_function |
| GO:0005471 | 1 | gene_02936.t1 | | ATP:ADP antiporter activity | molecular_function |
| GO:0004252 | 16 | gene_08545.t1,gene_05844.t1,gene_09415.t1,gene_10410.t1,gene_06294.t1,gene_09050.t1,gene_03043.t1,gene_00430.t1,gene_07983.t1,gene_01516.t1,gene_05202.t1,gene_07700.t1,gene_10601.t1,gene_03322.t1,gene_07191.t1,gene_10536.t1 | | serine-type endopeptidase activity | molecular_function |
| GO:0008963 | 1 | gene_07018.t1 | | phospho-N-acetylmuramoyl-pentapeptide-transferase activity | molecular_function |
| GO:0008962 | 1 | gene_04012.t1 | | phosphatidylglycerophosphatase activity | molecular_function |
| GO:0043169 | 1 | gene_08420.t1 | | cation binding | molecular_function |
| GO:0061863 | 1 | gene_10486.t1 | | microtubule plus end polymerase | molecular_function |
| GO:0004659 | 3 | gene_07849.t1,gene_05257.t1,gene_04763.t1 | | prenyltransferase activity | molecular_function |
| GO:0004657 | 3 | gene_03827.t1,gene_06401.t1,gene_02585.t1 | | proline dehydrogenase activity | molecular_function |

**Table S3 Detailed Gene Ontology (GO) classification of protein families in the genome of *P. paneum* OM1 (*Continued*)**

| **GO ID** | **Seq Num** | | **Seq List** | **GO term** | **Category** |
| --- | --- | --- | --- | --- | --- |
| GO:0004655 | 1 | gene_05150.t1 | | porphobilinogen synthase activity | molecular_function |
| GO:0004652 | 3 | gene_01933.t1,gene_04542.t1,gene_06034.t1 | | polynucleotide adenylyltransferase activity | molecular_function |
| GO:0004651 | 1 | gene_01488.t1 | | polynucleotide 5'-phosphatase activity | molecular_function |
| GO:0004650 | 6 | gene_01725.t1,gene_09475.t1,gene_00523.t1,gene_02551.t1,gene_00787.t1,gene_05091.t1 | | polygalacturonase activity | molecular_function |
| GO:0102148 | 2 | gene_00936.t1,gene_07473.t1 | | N-acetyl-beta-D-galactosaminidase activity | molecular_function |
| GO:0016763 | 1 | gene_09923.t1 | | pentosyltransferase activity | molecular_function |
| GO:0003843 | 1 | gene_10302.t1 | | 1,3-beta-D-glucan synthase activity | molecular_function |
| GO:0003842 | 3 | gene_03825.t1,gene_02582.t1,gene_06400.t1 | | 1-pyrroline-5-carboxylate dehydrogenase activity | molecular_function |
| GO:0003841 | 1 | gene_01086.t1 | | 1-acylglycerol-3-phosphate O-acyltransferase activity | molecular_function |
| GO:0003847 | 1 | gene_09933.t1 | | 1-alkyl-2-acetylglycerophosphocholine esterase activity | molecular_function |
| GO:0003844 | 1 | gene_08420.t1 | | 1,4-alpha-glucan branching enzyme activity | molecular_function |
| GO:0003849 | 3 | gene_00714.t1,gene_06027.t1,gene_02892.t1 | | 3-deoxy-7-phosphoheptulonate synthase activity | molecular_function |
| GO:0003848 | 1 | gene_00474.t1 | | 2-amino-4-hydroxy-6-hydroxymethyldihydropteridine diphosphokinase activity | molecular_function |
| GO:0016818 | 2 | gene_06073.t1,gene_08063.t1 | | hydrolase activity, acting on acid anhydrides, in phosphorus-containing anhydrides | molecular_function |
| GO:0016813 | 6 | gene_03227.t1,gene_09832.t1,gene_10451.t1,gene_10044.t1,gene_09523.t1,gene_00565.t1 | | hydrolase activity, acting on carbon-nitrogen (but not peptide) bonds, in linear amidines | molecular_function |
| GO:0016810 | 18 | gene_06380.t1,gene_03401.t1,gene_04344.t1,gene_03230.t1,gene_07682.t1,gene_02292.t1,gene_06903.t1,gene_04069.t1,gene_04664.t1,gene_01501.t1,gene_08253.t1,gene_00563.t1,gene_06979.t1,gene_07991.t1,gene_06821.t1,gene_05894.t1,gene_04675.t1,gene_07723.t1 | | hydrolase activity, acting on carbon-nitrogen (but not peptide) bonds | molecular_function |
| GO:0016811 | 5 | gene_06499.t1,gene_10192.t1,gene_10132.t1,gene_02714.t1,gene_06700.t1 | | hydrolase activity, acting on carbon-nitrogen (but not peptide) bonds, in linear amides | molecular_function |
| GO:0016814 | 1 | gene_08641.t1 | | hydrolase activity, acting on carbon-nitrogen (but not peptide) bonds, in cyclic amidines | molecular_function |
| GO:0003999 | 1 | gene_08329.t1 | | adenine phosphoribosyltransferase activity | molecular_function |
| GO:0003998 | 1 | gene_03692.t1 | | acylphosphatase activity | molecular_function |
| GO:0042910 | 3 | gene_05823.t1,gene_06518.t1,gene_09522.t1 | | xenobiotic transmembrane transporter activity | molecular_function |
| GO:0004096 | 6 | gene_03391.t1,gene_02272.t1,gene_05483.t1,gene_00621.t1,gene_00545.t1,gene_01284.t1 | | catalase activity | molecular_function |

**Table S3 Detailed Gene Ontology (GO) classification of protein families in the genome of *P. paneum* OM1 (*Continued*)**

| **GO ID** | **Seq Num** | | **Seq List** | **GO term** | **Category** |
| --- | --- | --- | --- | --- | --- |
| GO:0003995 | 4 | gene_02079.t1,gene_08181.t1,gene_04623.t1,gene_06475.t1 | | acyl-CoA dehydrogenase activity | molecular_function |
| GO:0003994 | 2 | gene_02452.t1,gene_10491.t1 | | aconitate hydratase activity | molecular_function |
| GO:0003997 | 2 | gene_09140.t1,gene_04430.t1 | | acyl-CoA oxidase activity | molecular_function |
| GO:0003991 | 1 | gene_00813.t1 | | acetylglutamate kinase activity | molecular_function |
| GO:0003993 | 2 | gene_09797.t1,gene_07067.t1 | | acid phosphatase activity | molecular_function |
| GO:0003992 | 1 | gene_07598.t1 | | N2-acetyl-L-ornithine:2-oxoglutarate 5-aminotransferase activity | molecular_function |
| GO:0016971 | 2 | gene_06755.t1,gene_08482.t1 | | flavin-linked sulfhydryl oxidase activity | molecular_function |
| GO:0016972 | 1 | gene_07528.t1 | | thiol oxidase activity | molecular_function |
| GO:0016603 | 1 | gene_01441.t1 | | glutaminyl-peptide cyclotransferase activity | molecular_function |
| GO:0016977 | 1 | gene_03906.t1 | | chitosanase activity | molecular_function |
| GO:0008569 | 1 | gene_05840.t1 | | minus-end-directed microtubule motor activity | molecular_function |
| GO:0004197 | 3 | gene_08053.t1,gene_04251.t1,gene_10617.t1 | | cysteine-type endopeptidase activity | molecular_function |
| GO:0003896 | 1 | gene_06743.t1 | | DNA primase activity | molecular_function |
| GO:0019887 | 3 | gene_09329.t1,gene_05406.t1,gene_01161.t1 | | protein kinase regulator activity | molecular_function |
| GO:0019888 | 4 | gene_07846.t1,gene_01539.t1,gene_10264.t1,gene_00255.t1 | | protein phosphatase regulator activity | molecular_function |
| GO:0002953 | 2 | gene_09420.t1,gene_07843.t1 | | 5'-deoxynucleotidase activity | molecular_function |
| GO:0008418 | 1 | gene_04568.t1 | | protein-N-terminal asparagine amidohydrolase activity | molecular_function |
| GO:0016779 | 5 | gene_03610.t1,gene_06335.t1,gene_01562.t1,gene_05774.t1,gene_04173.t1 | | nucleotidyltransferase activity | molecular_function |
| GO:0051538 | 2 | gene_04134.t1,gene_08431.t1 | | 3 iron, 4 sulfur cluster binding | molecular_function |
| GO:0051539 | 28 | gene_07021.t1,gene_02452.t1,gene_09462.t1,gene_05493.t1,gene_06309.t1,gene_08646.t1,gene_01018.t1,gene_04329.t1,gene_06236.t1,gene_02122.t1,gene_07825.t1,gene_06832.t1,gene_04152.t1,gene_06655.t1,gene_10491.t1,gene_08431.t1,gene_00766.t1,gene_10167.t1,gene_06856.t1,gene_10198.t1,gene_06168.t1,gene_09283.t1,gene_02861.t1,gene_01707.t1,gene_00595.t1,gene_08724.t1,gene_03200.t1,gene_10039.t1 | | 4 iron, 4 sulfur cluster binding | molecular_function |
| GO:0016773 | 4 | gene_01234.t1,gene_02019.t1,gene_03840.t1,gene_00701.t1 | | phosphotransferase activity, alcohol group as acceptor | molecular_function |
| GO:0016772 | 1 | gene_00398.t1 | | transferase activity, transferring phosphorus-containing groups | molecular_function |

**Table S3 Detailed Gene Ontology (GO) classification of protein families in the genome of *P. paneum* OM1 (*Continued*)**

| **GO ID** | **Seq Num** | | **Seq List** | **GO term** | **Category** |
| --- | --- | --- | --- | --- | --- |
| GO:0051536 | 11 | gene_00012.t1,gene_01840.t1,gene_00550.t1,gene_09097.t1,gene_01557.t1,gene_10005.t1,gene_07666.t1,gene_09528.t1,gene_09296.t1,gene_01839.t1,gene_01838.t1 | | iron-sulfur cluster binding | molecular_function |
| GO:0051537 | 20 | gene_09462.t1,gene_04337.t1,gene_09476.t1,gene_02122.t1,gene_08354.t1,gene_08431.t1,gene_10267.t1,gene_08412.t1,gene_04677.t1,gene_00010.t1,gene_06957.t1,gene_07228.t1,gene_01716.t1,gene_09493.t1,gene_04395.t1,gene_10070.t1,gene_09494.t1,gene_08724.t1,gene_01810.t1,gene_00305.t1 | | 2 iron, 2 sulfur cluster binding | molecular_function |
| GO:0070290 | 4 | gene_09152.t1,gene_07324.t1,gene_06298.t1,gene_08962.t1 | | N-acylphosphatidylethanolamine-specific phospholipase D activity | molecular_function |
| GO:0000977 | 1 | gene_06826.t1 | | RNA polymerase II transcription regulatory region sequence-specific DNA binding | molecular_function |
| GO:0070569 | 1 | gene_08343.t1 | | uridylyltransferase activity | molecular_function |
| GO:0016158 | 1 | gene_01494.t1 | | 3-phytase activity | molecular_function |
| GO:0047429 | 1 | gene_01995.t1 | | nucleoside-triphosphate diphosphatase activity | molecular_function |
| GO:0047419 | 1 | gene_09762.t1 | | N-acetylgalactosamine-6-phosphate deacetylase activity | molecular_function |
| GO:0043565 | 18 | gene_03579.t1,gene_08663.t1,gene_02408.t1,gene_07750.t1,gene_02778.t1,gene_00906.t1,gene_01321.t1,gene_09262.t1,gene_03104.t1,gene_10443.t1,gene_02995.t1,gene_08025.t1,gene_09052.t1,gene_10265.t1,gene_04730.t1,gene_05943.t1,gene_09415.t1,gene_07331.t1 | | sequence-specific DNA binding | molecular_function |
| GO:0042284 | 1 | gene_00327.t1 | | sphingolipid delta-4 desaturase activity | molecular_function |
| GO:0042283 | 1 | gene_06325.t1 | | dolichyl pyrophosphate Glc1Man9GlcNAc2 alpha-1,3-glucosyltransferase activity | molecular_function |
| GO:0042281 | 1 | gene_06952.t1 | | dolichyl pyrophosphate Man9GlcNAc2 alpha-1,3-glucosyltransferase activity | molecular_function |
| GO:0008597 | 1 | gene_09598.t1 | | calcium-dependent protein serine/threonine phosphatase regulator activity | molecular_function |
| GO:0019863 | 3 | gene_01766.t1,gene_02705.t1,gene_02259.t1 | | IgE binding | molecular_function |
| GO:0017040 | 1 | gene_02496.t1 | | N-acylsphingosine amidohydrolase activity | molecular_function |
| GO:0003873 | 3 | gene_09166.t1,gene_09708.t1,gene_04120.t1 | | 6-phosphofructo-2-kinase activity | molecular_function |
| GO:0015187 | 1 | gene_10133.t1 | | glycine transmembrane transporter activity | molecular_function |
| GO:0033857 | 1 | gene_02352.t1 | | diphosphoinositol-pentakisphosphate kinase activity | molecular_function |
| GO:0010309 | 1 | gene_09578.t1 | | acireductone dioxygenase [iron(II)-requiring] activity | molecular_function |

**Table S3 Detailed Gene Ontology (GO) classification of protein families in the genome of *P. paneum* OM1 (*Continued*)**

| **GO ID** | **Seq Num** | | **Seq List** | **GO term** | **Category** |
| --- | --- | --- | --- | --- | --- |
| GO:0106306 | 13 | gene_06995.t1,gene_06473.t1,gene_08075.t1,gene_00538.t1,gene_05893.t1,gene_02699.t1,gene_02586.t1,gene_08141.t1,gene_01849.t1,gene_05815.t1,gene_07386.t1,gene_05704.t1,gene_01669.t1 | | protein serine/threonine phosphatase activity | molecular_function |
| GO:0106307 | 13 | gene_06995.t1,gene_06473.t1,gene_08075.t1,gene_00538.t1,gene_05893.t1,gene_02699.t1,gene_02586.t1,gene_08141.t1,gene_01849.t1,gene_05815.t1,gene_07386.t1,gene_05704.t1,gene_01669.t1 | | protein serine/threonine phosphatase activity | molecular_function |
| GO:0005049 | 2 | gene_06778.t1,gene_05152.t1 | | nuclear export signal receptor activity | molecular_function |
| GO:0005047 | 2 | gene_01542.t1,gene_09488.t1 | | signal recognition particle binding | molecular_function |
| GO:0009916 | 1 | gene_03691.t1 | | alternative oxidase activity | molecular_function |
| GO:0005267 | 2 | gene_05298.t1,gene_05727.t1 | | potassium channel activity | molecular_function |
| GO:0005262 | 1 | gene_09233.t1 | | calcium channel activity | molecular_function |
| GO:0004798 | 1 | gene_07888.t1 | | thymidylate kinase activity | molecular_function |
| GO:0004799 | 1 | gene_01301.t1 | | thymidylate synthase activity | molecular_function |
| GO:0004794 | 1 | gene_01418.t1 | | L-threonine ammonia-lyase activity | molecular_function |
| GO:0004792 | 2 | gene_04708.t1,gene_08455.t1 | | thiosulfate sulfurtransferase activity | molecular_function |
| GO:0051907 | 1 | gene_07706.t1 | | S-(hydroxymethyl)glutathione synthase activity | molecular_function |
| GO:0004791 | 1 | gene_10408.t1 | | thioredoxin-disulfide reductase activity | molecular_function |
| GO:0004408 | 2 | gene_01243.t1,gene_00351.t1 | | holocytochrome-c synthase activity | molecular_function |
| GO:0004409 | 1 | gene_05493.t1 | | homoaconitate hydratase activity | molecular_function |
| GO:0102205 | 1 | gene_03179.t1 | | cholesterol alpha-glucosyltransferase activity | molecular_function |
| GO:0004402 | 7 | gene_07640.t1,gene_10281.t1,gene_03205.t1,gene_10633.t1,gene_02668.t1,gene_10024.t1,gene_09828.t1 | | histone acetyltransferase activity | molecular_function |
| GO:0004400 | 1 | gene_02197.t1 | | histidinol-phosphate transaminase activity | molecular_function |
| GO:0004401 | 1 | gene_01269.t1 | | histidinol-phosphatase activity | molecular_function |
| GO:0005319 | 1 | gene_07672.t1 | | lipid transporter activity | molecular_function |
| GO:0004222 | 14 | gene_00418.t1,gene_04093.t1,gene_09674.t1,gene_02185.t1,gene_02676.t1,gene_10098.t1,gene_03008.t1,gene_06270.t1,gene_09189.t1,gene_01852.t1,gene_08668.t1,gene_01197.t1,gene_03604.t1,gene_10062.t1 | | metalloendopeptidase activity | molecular_function |
| GO:0008775 | 1 | gene_00257.t1 | | acetate CoA-transferase activity | molecular_function |
| GO:0008776 | 1 | gene_03086.t1 | | acetate kinase activity | molecular_function |

**Table S3 Detailed Gene Ontology (GO) classification of protein families in the genome of *P. paneum* OM1 (*Continued*)**

| **GO ID** | **Seq Num** | | **Seq List** | **GO term** | **Category** |
| --- | --- | --- | --- | --- | --- |
| GO:0005315 | 7 | gene_07824.t1,gene_07220.t1,gene_06183.t1,gene_07633.t1,gene_07427.t1,gene_06091.t1,gene_01931.t1 | | inorganic phosphate transmembrane transporter activity | molecular_function |
| GO:0008171 | 14 | gene_00612.t1,gene_00334.t1,gene_03441.t1,gene_02625.t1,gene_08992.t1,gene_04453.t1,gene_02875.t1,gene_04278.t1,gene_05115.t1,gene_03477.t1,gene_10674.t1,gene_06497.t1,gene_00606.t1,gene_03543.t1 | | O-methyltransferase activity | molecular_function |
| GO:0008177 | 2 | gene_07137.t1,gene_08431.t1 | | succinate dehydrogenase (ubiquinone) activity | molecular_function |
| GO:0008175 | 1 | gene_03856.t1 | | tRNA methyltransferase activity | molecular_function |
| GO:0004821 | 1 | gene_10413.t1 | | histidine-tRNA ligase activity | molecular_function |
| GO:0000155 | 15 | gene_08922.t1,gene_05757.t1,gene_08565.t1,gene_02390.t1,gene_03901.t1,gene_05645.t1,gene_04216.t1,gene_06890.t1,gene_08953.t1,gene_09971.t1,gene_02680.t1,gene_01792.t1,gene_05278.t1,gene_07699.t1,gene_01749.t1 | | phosphorelay sensor kinase activity | molecular_function |
| GO:0000156 | 1 | gene_10265.t1 | | phosphorelay response regulator activity | molecular_function |
| GO:0000150 | 3 | gene_05469.t1,gene_08341.t1,gene_06097.t1 | | DNA strand exchange activity | molecular_function |
| GO:0004313 | 1 | gene_02332.t1 | | [acyl-carrier-protein] S-acetyltransferase activity | molecular_function |
| GO:0004310 | 2 | gene_04746.t1,gene_10502.t1 | | farnesyl-diphosphate farnesyltransferase activity | molecular_function |
| GO:0004316 | 1 | gene_02333.t1 | | 3-oxoacyl-[acyl-carrier-protein] reductase (NADPH) activity | molecular_function |
| GO:0004317 | 1 | gene_02332.t1 | | 3-hydroxypalmitoyl-[acyl-carrier-protein] dehydratase activity | molecular_function |
| GO:0004314 | 1 | gene_02332.t1 | | [acyl-carrier-protein] S-malonyltransferase activity | molecular_function |
| GO:0004315 | 17 | gene_02333.t1,gene_06013.t1,gene_09831.t1,gene_00004.t1,gene_00239.t1,gene_09503.t1,gene_09894.t1,gene_01127.t1,gene_05606.t1,gene_07489.t1,gene_01824.t1,gene_07895.t1,gene_05500.t1,gene_10275.t1,gene_00779.t1,gene_05302.t1,gene_00854.t1 | | 3-oxoacyl-[acyl-carrier-protein] synthase activity | molecular_function |
| GO:0102339 | 1 | gene_06564.t1 | | 3-oxo-arachidoyl-CoA reductase activity | molecular_function |
| GO:0004318 | 1 | gene_02332.t1 | | enoyl-[acyl-carrier-protein] reductase (NADH) activity | molecular_function |
| GO:0102158 | 1 | gene_04035.t1 | | very-long-chain 3-hydroxyacyl-CoA dehydratase activity | molecular_function |
| GO:0004139 | 2 | gene_10518.t1,gene_06835.t1 | | deoxyribose-phosphate aldolase activity | molecular_function |
| GO:0050464 | 1 | gene_08723.t1 | | nitrate reductase (NADPH) activity | molecular_function |
| GO:0004134 | 1 | gene_00709.t1 | | 4-alpha-glucanotransferase activity | molecular_function |
| GO:0004135 | 1 | gene_00709.t1 | | amylo-alpha-1,6-glucosidase activity | molecular_function |
| GO:0003860 | 1 | gene_08548.t1 | | 3-hydroxyisobutyryl-CoA hydrolase activity | molecular_function |

**Table S3 Detailed Gene Ontology (GO) classification of protein families in the genome of *P. paneum* OM1 (*Continued*)**

| **GO ID** | **Seq Num** | | **Seq List** | **GO term** | **Category** |
| --- | --- | --- | --- | --- | --- |
| GO:0008312 | 5 | gene_01542.t1,gene_06620.t1,gene_04006.t1,gene_04397.t1,gene_07051.t1 | | 7S RNA binding | molecular_function |
| GO:0008318 | 3 | gene_01380.t1,gene_02411.t1,gene_09347.t1 | | protein prenyltransferase activity | molecular_function |
| GO:0003839 | 3 | gene_06808.t1,gene_08330.t1,gene_00716.t1 | | gamma-glutamylcyclotransferase activity | molecular_function |
| GO:0046912 | 2 | gene_09454.t1,gene_00056.t1 | | acyltransferase, acyl groups converted into alkyl on transfer | molecular_function |
| GO:0070628 | 3 | gene_05404.t1,gene_10093.t1,gene_06474.t1 | | proteasome binding | molecular_function |
| GO:0008080 | 37 | gene_08938.t1,gene_05507.t1,gene_01760.t1,gene_03319.t1,gene_03506.t1,gene_05496.t1,gene_04016.t1,gene_03258.t1,gene_03030.t1,gene_10040.t1,gene_02741.t1,gene_00213.t1,gene_03185.t1,gene_01146.t1,gene_04329.t1,gene_00190.t1,gene_03278.t1,gene_00831.t1,gene_03688.t1,gene_05563.t1,gene_00196.t1,gene_07690.t1,gene_02558.t1,gene_05438.t1,gene_08854.t1,gene_01389.t1,gene_05215.t1,gene_01030.t1,gene_03382.t1,gene_10125.t1,gene_09022.t1,gene_01698.t1,gene_06572.t1,gene_01288.t1,gene_02866.t1,gene_02274.t1,gene_03507.t1 | | N-acetyltransferase activity | molecular_function |
| GO:0008081 | 14 | gene_06246.t1,gene_05550.t1,gene_02316.t1,gene_01039.t1,gene_04078.t1,gene_09304.t1,gene_04437.t1,gene_05344.t1,gene_00652.t1,gene_10194.t1,gene_08491.t1,gene_00957.t1,gene_05337.t1,gene_09572.t1 | | phosphoric diester hydrolase activity | molecular_function |
| GO:0070626 | 1 | gene_07647.t1 | | (S)-2-(5-amino-1-(5-phospho-D-ribosyl)imidazole-4-carboxamido) succinate lyase (fumarate-forming) activity | molecular_function |
| GO:0070917 | 1 | gene_06167.t1 | | inositol phosphoceramide synthase regulator activity | molecular_function |
| GO:0003949 | 1 | gene_04327.t1 | | 1-(5-phosphoribosyl)-5-[(5-phosphoribosylamino)methylideneamino]imidazole-4-carboxamide isomerase activity | molecular_function |
| GO:0003942 | 1 | gene_00813.t1 | | N-acetyl-gamma-glutamyl-phosphate reductase activity | molecular_function |
| GO:0008553 | 5 | gene_07874.t1,gene_00003.t1,gene_06942.t1,gene_00673.t1,gene_01833.t1 | | P-type proton-exporting transporter activity | molecular_function |
| GO:0050048 | 2 | gene_09326.t1,gene_00557.t1 | | L-leucine:2-oxoglutarate aminotransferase activity | molecular_function |
| GO:0004559 | 1 | gene_07184.t1 | | alpha-mannosidase activity | molecular_function |
| GO:0046820 | 1 | gene_09639.t1 | | 4-amino-4-deoxychorismate synthase activity | molecular_function |
| GO:0015385 | 2 | gene_04349.t1,gene_06398.t1 | | sodium:proton antiporter activity | molecular_function |

**Table S3 Detailed Gene Ontology (GO) classification of protein families in the genome of *P. paneum* OM1 (*Continued*)**

| **GO ID** | **Seq Num** | | **Seq List** | **GO term** | **Category** |
| --- | --- | --- | --- | --- | --- |
| GO:0016491 | 356 | gene_05287.t1,gene_05357.t1,gene_08768.t1,gene_02287.t1,gene_08310.t1,gene_01218.t1,gene_01991.t1,gene_06616.t1,gene_05744.t1,gene_05878.t1,gene_04617.t1,gene_05734.t1,gene_00798.t1,gene_06430.t1,gene_02087.t1,gene_08780.t1,gene_00885.t1,gene_05974.t1,gene_07121.t1,gene_06376.t1,gene_00920.t1,gene_06568.t1,gene_01731.t1,gene_00760.t1,gene_00209.t1,gene_04970.t1,gene_04281.t1,gene_06528.t1,gene_09648.t1,gene_06859.t1,gene_02721.t1,gene_02858.t1,gene_01484.t1,gene_09898.t1,gene_05439.t1,gene_08228.t1,gene_00490.t1,gene_05255.t1,gene_04261.t1,gene_06895.t1,gene_05352.t1,gene_09905.t1,gene_09502.t1,gene_09090.t1,gene_06582.t1,gene_05888.t1,gene_09519.t1,gene_09553.t1,gene_06403.t1,gene_07189.t1,gene_01443.t1,gene_05331.t1,gene_03303.t1,gene_06423.t1,gene_05606.t1,gene_09544.t1,gene_00874.t1,gene_08354.t1,gene_03817.t1,gene_01570.t1,gene_06673.t1,gene_05923.t1,gene_08440.t1,gene_08186.t1,gene_09503.t1,gene_05996.t1,gene_01464.t1,gene_06715.t1,gene_06647.t1,gene_00066.t1,gene_06478.t1,gene_07541.t1,gene_08378.t1,gene_02063.t1,gene_04121.t1,gene_08153.t1,gene_09899.t1,gene_03359.t1,gene_02552.t1,gene_02900.t1,gene_04514.t1,gene_10504.t1,gene_01147.t1,gene_07020.t1,gene_04790.t1,gene_00443.t1,gene_04840.t1,gene_07861.t1,gene_01444.t1,gene_06810.t1,gene_00752.t1,gene_06687.t1,gene_10407.t1,gene_08519.t1,gene_05107.t1,gene_06745.t1,gene_03129.t1,gene_05480.t1,gene_04021.t1,gene_02163.t1,gene_05767.t1,gene_09291.t1,gene_04052.t1,gene_03500.t1,gene_00781.t1,gene_04629.t1,gene_03528.t1,gene_00386.t1,gene_00633.t1,gene_04740.t1,gene_02298.t1,gene_03973.t1,gene_03739.t1,gene_00771.t1,gene_03321.t1,gene_10117.t1,gene_07154.t1,gene_00917.t1,gene_02950.t1,gene_02306.t1,gene_05093.t1,gene_04670.t1,gene_04667.t1,gene_07086.t1,gene_08783.t1,gene_00816.t1,gene_04162.t1,gene_02010.t1,gene_08644.t1,gene_08930.t1,gene_08392.t1,gene_09801.t1,gene_06168.t1,gene_02616.t1,gene_07944.t1,gene_05258.t1,gene_04282.t1,gene_08787.t1,gene_10551.t1,gene_07114.t1,gene_06368.t1,gene_01936.t1,gene_07930.t1,gene_09520.t1,gene_10086.t1,gene_07805.t1,gene_00341.t1,gene_09655.t1,gene_02475.t1,gene_04523.t1,gene_07445.t1,gene_05966.t1,gene_07894.t1,gene_10101.t1,gene_03150.t1,gene_10643.t1,gene_02597.t1,gene_04399.t1,gene_08019.t1,gene_09589.t1,gene_07939.t1,gene_08542.t1,gene_01253.t1,gene_01132.t1,gene_05431.t1,gene_04675.t1,gene_02266.t1,gene_07976.t1,gene_01966.t1,gene_07970.t1,gene_06730.t1,gene_01127.t1,gene_01694.t1,gene_09714.t1,gene_04565.t1,gene_06964.t1,gene_08134.t1,gene_00239.t1,gene_08786.t1,gene_00237.t1, | | oxidoreductase activity | molecular_function |

**Table S3 Detailed Gene Ontology (GO) classification of protein families in the genome of *P. paneum* OM1 (*Continued*)**

| **GO ID** | **Seq Num** | | **Seq List** | **GO term** | **Category** |
| --- | --- | --- | --- | --- | --- |
| GO:0016491 | 356 | gene_10427.t1,gene_00095.t1,gene_00854.t1,gene_05411.t1,gene_09678.t1,gene_08784.t1,gene_04306.t1,gene_04708.t1,gene_01716.t1,gene_09900.t1,gene_00380.t1,gene_01343.t1,gene_08426.t1,gene_06771.t1,gene_10435.t1,gene_01344.t1,gene_00338.t1,gene_04262.t1,gene_04704.t1,gene_00943.t1,gene_02267.t1,gene_08822.t1,gene_00944.t1,gene_09383.t1,gene_05765.t1,gene_00210.t1,gene_01821.t1,gene_05286.t1,gene_09023.t1,gene_08445.t1,gene_09497.t1,gene_03421.t1,gene_06411.t1,gene_03096.t1,gene_00252.t1,gene_05499.t1,gene_00126.t1,gene_09466.t1,gene_07962.t1,gene_08559.t1,gene_08731.t1,gene_08912.t1,gene_10667.t1,gene_01784.t1,gene_00956.t1,gene_05506.t1,gene_06751.t1,gene_03119.t1,gene_05259.t1,gene_02129.t1,gene_06969.t1,gene_02171.t1,gene_06371.t1,gene_02169.t1,gene_06940.t1,gene_07780.t1,gene_08782.t1,gene_10669.t1,gene_06055.t1,gene_01100.t1,gene_04351.t1,gene_04922.t1,gene_05076.t1,gene_04072.t1,gene_09693.t1,gene_04743.t1,gene_07448.t1,gene_02687.t1,gene_00042.t1,gene_07586.t1,gene_07661.t1,gene_05048.t1,gene_09292.t1,gene_02138.t1,gene_05500.t1,gene_03109.t1,gene_04735.t1,gene_08057.t1,gene_00121.t1,gene_03417.t1,gene_05382.t1,gene_02168.t1,gene_02229.t1,gene_06435.t1,gene_02009.t1,gene_08452.t1,gene_04868.t1,gene_02611.t1,gene_01193.t1,gene_02581.t1,gene_09876.t1,gene_10440.t1,gene_04008.t1,gene_10342.t1,gene_05289.t1,gene_01729.t1,gene_03008.t1,gene_03762.t1,gene_04368.t1,gene_08609.t1,gene_05600.t1,gene_08945.t1,gene_09499.t1,gene_01960.t1,gene_05350.t1,gene_02961.t1,gene_00821.t1,gene_06659.t1,gene_00645.t1,gene_01704.t1,gene_08069.t1,gene_03419.t1,gene_07905.t1,gene_08022.t1,gene_08502.t1,gene_04760.t1,gene_05360.t1,gene_02325.t1,gene_09173.t1,gene_01907.t1,gene_01318.t1,gene_03353.t1,gene_09806.t1,gene_08321.t1,gene_00780.t1,gene_01434.t1,gene_06110.t1,gene_00918.t1,gene_05430.t1,gene_05567.t1,gene_07279.t1,gene_08364.t1,gene_07087.t1,gene_10647.t1,gene_06569.t1,gene_01106.t1,gene_07860.t1,gene_09068.t1,gene_05262.t1,gene_02438.t1,gene_00751.t1,gene_09145.t1,gene_02312.t1,gene_01615.t1,gene_04118.t1,gene_06491.t1,gene_05622.t1,gene_01941.t1,gene_05764.t1,gene_05304.t1,gene_09535.t1,gene_10611.t1,gene_06200.t1,gene_03649.t1,gene_08058.t1,gene_03459.t1,gene_02825.t1,gene_07433.t1,gene_07560.t1,gene_06013.t1,gene_03557.t1,gene_08309.t1,gene_06982.t1,gene_00922.t1,gene_08132.t1,gene_10550.t1,gene_06592.t1,gene_03394.t1,gene_03722.t1,gene_01430.t1,gene_06695.t1,gene_05781.t1,gene_03921.t1,gene_09463.t1,gene_01908.t1,gene_09442.t1 | | oxidoreductase activity | molecular_function |

**Table S3 Detailed Gene Ontology (GO) classification of protein families in the genome of *P. paneum* OM1 (*Continued*)**

| **GO ID** | **Seq Num** | | **Seq List** | **GO term** | **Category** |
| --- | --- | --- | --- | --- | --- |
| GO:0016709 | 2 | gene_10412.t1,gene_07066.t1 | | oxidoreductase activity, acting on paired donors, with incorporation or reduction of molecular oxygen, NAD(P)H as one donor, and incorporation of one atom of oxygen | molecular_function |
| GO:0008425 | 1 | gene_04044.t1 | | 2-polyprenyl-6-methoxy-1,4-benzoquinone methyltransferase activity | molecular_function |
| GO:0016705 | 91 | gene_09837.t1,gene_07431.t1,gene_08439.t1,gene_00050.t1,gene_07089.t1,gene_10673.t1,gene_10252.t1,gene_02074.t1,gene_07674.t1,gene_01461.t1,gene_10670.t1,gene_06181.t1,gene_08016.t1,gene_08658.t1,gene_08018.t1,gene_01818.t1,gene_05434.t1,gene_02731.t1,gene_05157.t1,gene_01463.t1,gene_04764.t1,gene_07549.t1,gene_04130.t1,gene_01324.t1,gene_09909.t1,gene_07281.t1,gene_07691.t1,gene_02013.t1,gene_04065.t1,gene_07786.t1,gene_02311.t1,gene_06676.t1,gene_01460.t1,gene_02026.t1,gene_03669.t1,gene_07369.t1,gene_01111.t1,gene_05398.t1,gene_07833.t1,gene_09504.t1,gene_09177.t1,gene_03816.t1,gene_00994.t1,gene_00758.t1,gene_03517.t1,gene_00220.t1,gene_00834.t1,gene_01587.t1,gene_07934.t1,gene_03106.t1,gene_09020.t1,gene_04361.t1,gene_03360.t1,gene_01476.t1,gene_07490.t1,gene_00777.t1,gene_07117.t1,gene_01658.t1,gene_10569.t1,gene_07848.t1,gene_07526.t1,gene_03126.t1,gene_02190.t1,gene_09778.t1,gene_02258.t1,gene_10672.t1,gene_08446.t1,gene_09353.t1,gene_03911.t1,gene_09980.t1,gene_09970.t1,gene_03369.t1,gene_04527.t1,gene_08017.t1,gene_07727.t1,gene_01543.t1,gene_00601.t1,gene_07708.t1,gene_10572.t1,gene_02248.t1,gene_05975.t1,gene_09896.t1,gene_03978.t1,gene_00285.t1,gene_10014.t1,gene_09981.t1,gene_07507.t1,gene_07556.t1,gene_08430.t1,gene_03226.t1,gene_09394.t1 | | oxidoreductase activity, acting on paired donors, with incorporation or reduction of molecular oxygen | molecular_function |
| GO:0016702 | 3 | gene_09429.t1,gene_03746.t1,gene_01473.t1 | | oxidoreductase activity, acting on single donors with incorporation of molecular oxygen, incorporation of two atoms of oxygen | molecular_function |
| GO:0008422 | 5 | gene_03630.t1,gene_01601.t1,gene_06646.t1,gene_02981.t1,gene_08104.t1 | | beta-glucosidase activity | molecular_function |
| GO:0016701 | 2 | gene_05541.t1,gene_00790.t1 | | oxidoreductase activity, acting on single donors with incorporation of molecular oxygen | molecular_function |
| GO:0070577 | 1 | gene_10093.t1 | | lysine-acetylated histone binding | molecular_function |
| GO:0050136 | 1 | gene_09821.t1 | | NADH dehydrogenase (quinone) activity | molecular_function |
| GO:0070573 | 5 | gene_04769.t1,gene_08568.t1,gene_01855.t1,gene_07325.t1,gene_05474.t1 | | metallodipeptidase activity | molecular_function |
| GO:0019706 | 6 | gene_08206.t1,gene_07259.t1,gene_01186.t1,gene_06293.t1,gene_00203.t1,gene_03798.t1 | | protein-cysteine S-palmitoyltransferase activity | molecular_function |

**Table S3 Detailed Gene Ontology (GO) classification of protein families in the genome of *P. paneum* OM1 (*Continued*)**

| **GO ID** | **Seq Num** | | **Seq List** | **GO term** | **Category** |
| --- | --- | --- | --- | --- | --- |
| GO:0042162 | 3 | gene_04537.t1,gene_02991.t1,gene_05883.t1 | | telomeric DNA binding | molecular_function |
| GO:0047400 | 1 | gene_02846.t1 | | phosphonoacetate hydrolase activity | molecular_function |
| GO:0008453 | 1 | gene_05251.t1 | | alanine-glyoxylate transaminase activity | molecular_function |
| GO:0052761 | 1 | gene_03424.t1 | | exo-1,4-beta-D-glucosaminidase activity | molecular_function |
| GO:0016884 | 1 | gene_09197.t1 | | carbon-nitrogen ligase activity, with glutamine as amido-N-donor | molecular_function |
| GO:0030248 | 6 | gene_03404.t1,gene_10598.t1,gene_01844.t1,gene_01845.t1,gene_04755.t1,gene_00439.t1 | | cellulose binding | molecular_function |
| GO:0016231 | 1 | gene_03839.t1 | | beta-N-acetylglucosaminidase activity | molecular_function |
| GO:0030246 | 33 | gene_08471.t1,gene_08927.t1,gene_07380.t1,gene_07809.t1,gene_04046.t1,gene_06645.t1,gene_06586.t1,gene_06681.t1,gene_00082.t1,gene_00100.t1,gene_06149.t1,gene_05679.t1,gene_01032.t1,gene_06186.t1,gene_07184.t1,gene_09816.t1,gene_08997.t1,gene_03444.t1,gene_06235.t1,gene_02885.t1,gene_02291.t1,gene_01013.t1,gene_07334.t1,gene_02271.t1,gene_06646.t1,gene_10612.t1,gene_05571.t1,gene_06726.t1,gene_07881.t1,gene_08481.t1,gene_07562.t1,gene_08993.t1,gene_02323.t1 | | carbohydrate binding | molecular_function |
| GO:0016987 | 1 | gene_08925.t1 | | sigma factor activity | molecular_function |
| GO:0051730 | 1 | gene_05344.t1 | | GTP-dependent polyribonucleotide 5'-hydroxyl-kinase activity | molecular_function |
| GO:0051731 | 2 | gene_05890.t1,gene_03181.t1 | | polynucleotide 5'-hydroxyl-kinase activity | molecular_function |
| GO:0017057 | 1 | gene_00992.t1 | | 6-phosphogluconolactonase activity | molecular_function |
| GO:0017056 | 10 | gene_01229.t1,gene_06461.t1,gene_07308.t1,gene_01090.t1,gene_10042.t1,gene_09198.t1,gene_08808.t1,gene_08367.t1,gene_08906.t1,gene_09280.t1 | | structural constituent of nuclear pore | molecular_function |
| GO:0001164 | 1 | gene_00617.t1 | | RNA polymerase I core promoter sequence-specific DNA binding | molecular_function |
| GO:0035299 | 1 | gene_04076.t1 | | inositol pentakisphosphate 2-kinase activity | molecular_function |
| GO:0004731 | 1 | gene_09719.t1 | | purine-nucleoside phosphorylase activity | molecular_function |
| GO:0035615 | 2 | gene_01313.t1,gene_07106.t1 | | clathrin adaptor activity | molecular_function |
| GO:0106313 | 2 | gene_07024.t1,gene_07886.t1 | | methylenetetrahydrofolate reductase NADPH activity | molecular_function |
| GO:0106312 | 2 | gene_07024.t1,gene_07886.t1 | | methylenetetrahydrofolate reductase NADH activity | molecular_function |

**Table S3 Detailed Gene Ontology (GO) classification of protein families in the genome of *P. paneum* OM1 (*Continued*)**

| **GO ID** | **Seq Num** | | **Seq List** | **GO term** | **Category** |
| --- | --- | --- | --- | --- | --- |
| GO:0106310 | 30 | gene_02155.t1,gene_01198.t1,gene_00740.t1,gene_04066.t1,gene_03475.t1,gene_05244.t1,gene_08500.t1,gene_03061.t1,gene_10369.t1,gene_03660.t1,gene_02838.t1,gene_06106.t1,gene_01223.t1,gene_03314.t1,gene_09242.t1,gene_00801.t1,gene_04388.t1,gene_00848.t1,gene_08078.t1,gene_05820.t1,gene_06526.t1,gene_08612.t1,gene_09034.t1,gene_00548.t1,gene_05628.t1,gene_05629.t1,gene_04642.t1,gene_07102.t1,gene_08746.t1,gene_05846.t1 | | protein serine kinase activity | molecular_function |
| GO:0032132 | 1 | gene_03350.t1 | | O6-alkylguanine-DNA binding | molecular_function |
| GO:0005092 | 1 | gene_00826.t1 | | GDP-dissociation inhibitor activity | molecular_function |
| GO:0005093 | 1 | gene_07007.t1 | | Rab GDP-dissociation inhibitor activity | molecular_function |
| GO:0005096 | 19 | gene_09563.t1,gene_05579.t1,gene_08510.t1,gene_06053.t1,gene_03750.t1,gene_02369.t1,gene_05824.t1,gene_00029.t1,gene_01246.t1,gene_02829.t1,gene_07375.t1,gene_04154.t1,gene_05709.t1,gene_10307.t1,gene_08110.t1,gene_09815.t1,gene_00475.t1,gene_00965.t1,gene_07240.t1 | | GTPase activator activity | molecular_function |
| GO:0005094 | 1 | gene_05892.t1 | | Rho GDP-dissociation inhibitor activity | molecular_function |
| GO:0004789 | 1 | gene_01046.t1 | | thiamine-phosphate diphosphorylase activity | molecular_function |
| GO:0004788 | 1 | gene_04276.t1 | | thiamine diphosphokinase activity | molecular_function |
| GO:0004784 | 4 | gene_07979.t1,gene_10245.t1,gene_02136.t1,gene_02654.t1 | | superoxide dismutase activity | molecular_function |
| GO:0004781 | 1 | gene_07261.t1 | | sulfate adenylyltransferase (ATP) activity | molecular_function |
| GO:0004419 | 2 | gene_04620.t1,gene_07600.t1 | | hydroxymethylglutaryl-CoA lyase activity | molecular_function |
| GO:0004418 | 1 | gene_05843.t1 | | hydroxymethylbilane synthase activity | molecular_function |
| GO:0047874 | 1 | gene_09530.t1 | | dolichyldiphosphatase activity | molecular_function |
| GO:0004417 | 1 | gene_01046.t1 | | hydroxyethylthiazole kinase activity | molecular_function |
| GO:0004416 | 1 | gene_08534.t1 | | hydroxyacylglutathione hydrolase activity | molecular_function |
| GO:0004411 | 1 | gene_03809.t1 | | homogentisate 1,2-dioxygenase activity | molecular_function |
| GO:0004410 | 1 | gene_03989.t1 | | homocitrate synthase activity | molecular_function |
| GO:0004413 | 1 | gene_09231.t1 | | homoserine kinase activity | molecular_function |
| GO:0004412 | 1 | gene_05635.t1 | | homoserine dehydrogenase activity | molecular_function |
| GO:0047988 | 1 | gene_03643.t1 | | hydroxyacid-oxoacid transhydrogenase activity | molecular_function |
| GO:0003688 | 1 | gene_07862.t1 | | DNA replication origin binding | molecular_function |
| GO:0008942 | 1 | gene_08724.t1 | | nitrite reductase [NAD(P)H] activity | molecular_function |

**Table S3 Detailed Gene Ontology (GO) classification of protein families in the genome of *P. paneum* OM1 (*Continued*)**

| **GO ID** | **Seq Num** | | **Seq List** | **GO term** | **Category** |
| --- | --- | --- | --- | --- | --- |
| GO:0008941 | 1 | gene_03326.t1 | | nitric oxide dioxygenase activity | molecular_function |
| GO:0005324 | 1 | gene_02649.t1 | | long-chain fatty acid transporter activity | molecular_function |
| GO:0008168 | 50 | gene_09715.t1,gene_07369.t1,gene_08347.t1,gene_07742.t1,gene_03686.t1,gene_08400.t1,gene_00786.t1,gene_09600.t1,gene_00044.t1,gene_01127.t1,gene_02726.t1,gene_01679.t1,gene_10176.t1,gene_03893.t1,gene_03669.t1,gene_00239.t1,gene_05279.t1,gene_05786.t1,gene_01676.t1,gene_01397.t1,gene_09477.t1,gene_04497.t1,gene_02225.t1,gene_07039.t1,gene_04324.t1,gene_03090.t1,gene_09851.t1,gene_01168.t1,gene_01715.t1,gene_10027.t1,gene_01784.t1,gene_09459.t1,gene_07850.t1,gene_03196.t1,gene_06086.t1,gene_01783.t1,gene_07963.t1,gene_02659.t1,gene_00180.t1,gene_05606.t1,gene_06478.t1,gene_05302.t1,gene_10501.t1,gene_05177.t1,gene_00854.t1,gene_08025.t1,gene_01287.t1,gene_01824.t1,gene_02183.t1,gene_03168.t1 | | methyltransferase activity | molecular_function |
| GO:0042626 | 5 | gene_09573.t1,gene_08358.t1,gene_05111.t1,gene_09901.t1,gene_05827.t1 | | ATPase-coupled transmembrane transporter activity | molecular_function |
| GO:0140580 | 1 | gene_08030.t1 | | mitochondrion autophagosome adaptor activity | molecular_function |
| GO:0008897 | 3 | gene_01270.t1,gene_02333.t1,gene_01087.t1 | | holo-[acyl-carrier-protein] synthase activity | molecular_function |
| GO:0008892 | 1 | gene_07694.t1 | | guanine deaminase activity | molecular_function |
| GO:0004301 | 1 | gene_01201.t1 | | epoxide hydrolase activity | molecular_function |
| GO:0004306 | 1 | gene_09295.t1 | | ethanolamine-phosphate cytidylyltransferase activity | molecular_function |
| GO:0005254 | 2 | gene_08068.t1,gene_06127.t1 | | chloride channel activity | molecular_function |
| GO:0005524 | 634 | gene_06204.t1,gene_08185.t1,gene_05619.t1,gene_00005.t1,gene_05143.t1,gene_03779.t1,gene_08963.t1,gene_03977.t1,gene_00017.t1,gene_10098.t1,gene_09640.t1,gene_06202.t1,gene_03074.t1,gene_03801.t1,gene_07888.t1,gene_03372.t1,gene_04779.t1,gene_05505.t1,gene_01682.t1,gene_05442.t1,gene_01792.t1,gene_05707.t1,gene_02826.t1,gene_03571.t1,gene_01352.t1,gene_09184.t1,gene_02514.t1,gene_08746.t1,gene_08875.t1,gene_02480.t1,gene_02627.t1,gene_09742.t1,gene_07903.t1,gene_07003.t1,gene_03790.t1,gene_00743.t1,gene_04210.t1,gene_05208.t1,gene_09161.t1,gene_10355.t1,gene_00682.t1,gene_06422.t1,gene_05954.t1,gene_03602.t1,gene_04388.t1,gene_07409.t1,gene_01737.t1,gene_00724.t1,gene_06516.t1,gene_03494.t1,gene_03625.t1,gene_06272.t1,gene_10398.t1,gene_05738.t1,gene_03046.t1,gene_07862.t1,gene_10065.t1,gene_03407.t1,gene_00879.t1,gene_10464.t1,gene_00321.t1,gene_10185.t1,gene_04219.t1,gene_03627.t1,gene_10327.t1,gene_09273.t1,gene_10020.t1,gene_07842.t1,gene_08593.t1,gene_08741.t1,gene_00799.t1,gene_08527.t1,gene_06310.t1,gene_04206.t1,gene_03576.t1, | | ATP binding | molecular_function |

**Table S3 Detailed Gene Ontology (GO) classification of protein families in the genome of *P. paneum* OM1 (*Continued*)**

| **GO ID** | **Seq Num** | | **Seq List** | **GO term** | **Category** |
| --- | --- | --- | --- | --- | --- |
| GO:0005524 | 634 | gene_02623.t1,gene_06799.t1,gene_04290.t1,gene_07797.t1,gene_03570.t1,gene_10074.t1,gene_07343.t1,gene_02682.t1,gene_03338.t1,gene_06611.t1,gene_03237.t1,gene_04212.t1,gene_06241.t1,gene_00034.t1,gene_01081.t1,gene_01556.t1,gene_09107.t1,gene_01363.t1,gene_09829.t1,gene_00134.t1,gene_05677.t1,gene_09554.t1,gene_04352.t1,gene_00882.t1,gene_07453.t1,gene_05628.t1,gene_06180.t1,gene_07102.t1,gene_04776.t1,gene_05654.t1,gene_08245.t1,gene_09034.t1,gene_05695.t1,gene_00514.t1,gene_00320.t1,gene_06014.t1,gene_02024.t1,gene_07180.t1,gene_06711.t1,gene_01445.t1,gene_04419.t1,gene_05837.t1,gene_08909.t1,gene_03840.t1,gene_03903.t1,gene_02959.t1,gene_09591.t1,gene_07873.t1,gene_10351.t1,gene_02049.t1,gene_08235.t1,gene_09704.t1,gene_00003.t1,gene_08419.t1,gene_00030.t1,gene_09668.t1,gene_07590.t1,gene_08078.t1,gene_08961.t1,gene_03637.t1,gene_06901.t1,gene_07917.t1,gene_10263.t1,gene_05211.t1,gene_08209.t1,gene_04268.t1,gene_01056.t1,gene_00089.t1,gene_10210.t1,gene_05928.t1,gene_03207.t1,gene_01507.t1,gene_08389.t1,gene_00517.t1,gene_03849.t1,gene_06412.t1,gene_07278.t1,gene_06073.t1,gene_07874.t1,gene_02841.t1,gene_01446.t1,gene_09211.t1,gene_06343.t1,gene_06106.t1,gene_09029.t1,gene_08036.t1,gene_07377.t1,gene_08023.t1,gene_05700.t1,gene_10636.t1,gene_07649.t1,gene_07918.t1,gene_07650.t1,gene_00515.t1,gene_09222.t1,gene_07804.t1,gene_09396.t1,gene_05556.t1,gene_06429.t1,gene_04010.t1,gene_04233.t1,gene_01364.t1,gene_04663.t1,gene_00660.t1,gene_06062.t1,gene_06902.t1,gene_03773.t1,gene_03086.t1,gene_02251.t1,gene_10557.t1,gene_10372.t1,gene_06495.t1,gene_08162.t1,gene_05105.t1,gene_07906.t1,gene_03181.t1,gene_07321.t1,gene_03855.t1,gene_03818.t1,gene_06236.t1,gene_04460.t1,gene_07825.t1,gene_00948.t1,gene_03211.t1,gene_01074.t1,gene_07819.t1,gene_06655.t1,gene_09265.t1,gene_08215.t1,gene_09717.t1,gene_07367.t1,gene_10553.t1,gene_08388.t1,gene_08513.t1,gene_08399.t1,gene_06526.t1,gene_07666.t1,gene_00848.t1,gene_04469.t1,gene_03291.t1,gene_05141.t1,gene_02774.t1,gene_04722.t1,gene_07078.t1,gene_07559.t1,gene_00838.t1,gene_05458.t1,gene_09562.t1,gene_03396.t1,gene_03896.t1,gene_08071.t1,gene_07695.t1,gene_09071.t1,gene_02155.t1,gene_07408.t1,gene_00813.t1,gene_02766.t1,gene_10413.t1,gene_01382.t1,gene_02077.t1,gene_05866.t1,gene_10607.t1,gene_07899.t1,gene_09056.t1,gene_00801.t1,gene_04139.t1,gene_02991.t1,gene_05426.t1,gene_05469.t1,gene_04461.t1,gene_05535.t1,gene_03524.t1,gene_05831.t1,gene_07765.t1,gene_07403.t1,gene_09645.t1,gene_02420.t1,gene_03204.t1,gene_08650.t1,gene_09582.t1, | | ATP binding | molecular_function |

**Table S3 Detailed Gene Ontology (GO) classification of protein families in the genome of *P. paneum* OM1 (*Continued*)**

| **GO ID** | **Seq Num** | | **Seq List** | **GO term** | **Category** |
| --- | --- | --- | --- | --- | --- |
| GO:0005524 | 634 | gene_09875.t1,gene_07744.t1,gene_01826.t1,gene_04092.t1,gene_00738.t1,gene_01833.t1,gene_04624.t1,gene_01353.t1,gene_04186.t1,gene_04315.t1,gene_05457.t1,gene_02352.t1,gene_08813.t1,gene_03061.t1,gene_08063.t1,gene_06315.t1,gene_05618.t1,gene_05564.t1,gene_00218.t1,gene_09735.t1,gene_08612.t1,gene_08575.t1,gene_08871.t1,gene_06624.t1,gene_06458.t1,gene_00533.t1,gene_01751.t1,gene_08070.t1,gene_00723.t1,gene_00673.t1,gene_07680.t1,gene_01422.t1,gene_09870.t1,gene_02734.t1,gene_09325.t1,gene_05305.t1,gene_09891.t1,gene_08258.t1,gene_04537.t1,gene_05111.t1,gene_03598.t1,gene_04567.t1,gene_07212.t1,gene_07286.t1,gene_05577.t1,gene_10520.t1,gene_00625.t1,gene_03900.t1,gene_03476.t1,gene_00613.t1,gene_05645.t1,gene_07503.t1,gene_02520.t1,gene_09414.t1,gene_05374.t1,gene_07138.t1,gene_04276.t1,gene_01236.t1,gene_04211.t1,gene_02838.t1,gene_04724.t1,gene_10019.t1,gene_09819.t1,gene_00303.t1,gene_08229.t1,gene_05874.t1,gene_09416.t1,gene_09453.t1,gene_01196.t1,gene_01183.t1,gene_01564.t1,gene_08889.t1,gene_06480.t1,gene_08044.t1,gene_10365.t1,gene_05890.t1,gene_09267.t1,gene_08845.t1,gene_01710.t1,gene_01640.t1,gene_01341.t1,gene_05629.t1,gene_04642.t1,gene_02449.t1,gene_01319.t1,gene_08753.t1,gene_02559.t1,gene_03538.t1,gene_10665.t1,gene_09871.t1,gene_10097.t1,gene_05745.t1,gene_02486.t1,gene_07312.t1,gene_09780.t1,gene_04467.t1,gene_00875.t1,gene_06009.t1,gene_03702.t1,gene_01435.t1,gene_03960.t1,gene_05660.t1,gene_10462.t1,gene_08299.t1,gene_03645.t1,gene_04566.t1,gene_05865.t1,gene_01409.t1,gene_10515.t1,gene_06720.t1,gene_01223.t1,gene_06471.t1,gene_03268.t1,gene_09744.t1,gene_09629.t1,gene_09415.t1,gene_06540.t1,gene_01715.t1,gene_02173.t1,gene_02676.t1,gene_00363.t1,gene_01781.t1,gene_09398.t1,gene_07298.t1,gene_07628.t1,gene_00486.t1,gene_02523.t1,gene_00302.t1,gene_05344.t1,gene_04173.t1,gene_08916.t1,gene_09510.t1,gene_04520.t1,gene_07172.t1,gene_06116.t1,gene_05846.t1,gene_10284.t1,gene_09244.t1,gene_06196.t1,gene_04777.t1,gene_02387.t1,gene_00510.t1,gene_10524.t1,gene_00300.t1,gene_00426.t1,gene_02062.t1,gene_01911.t1,gene_09708.t1,gene_06413.t1,gene_05844.t1,gene_01532.t1,gene_08610.t1,gene_08460.t1,gene_03551.t1,gene_03597.t1,gene_05879.t1,gene_10043.t1,gene_00937.t1,gene_01914.t1,gene_03580.t1,gene_01265.t1,gene_00740.t1,gene_09224.t1,gene_03488.t1,gene_06792.t1,gene_01636.t1,gene_09513.t1,gene_00502.t1,gene_07157.t1,gene_07620.t1,gene_00504.t1,gene_01030.t1,gene_06942.t1,gene_09569.t1,gene_09703.t1,gene_10362.t1,gene_03967.t1,gene_10324.t1,gene_03888.t1,gene_10494.t1, | | ATP binding | molecular_function |

**Table S3 Detailed Gene Ontology (GO) classification of protein families in the genome of *P. paneum* OM1 (*Continued*)**

| **GO ID** | **Seq Num** | | **Seq List** | **GO term** | **Category** |
| --- | --- | --- | --- | --- | --- |
| GO:0005524 | 634 | gene_00474.t1,gene_08266.t1,gene_09901.t1,gene_09679.t1,gene_01719.t1,gene_03055.t1,gene_05462.t1,gene_04223.t1,gene_07160.t1,gene_00643.t1,gene_04066.t1,gene_03414.t1,gene_05840.t1,gene_01919.t1,gene_05244.t1,gene_02324.t1,gene_03092.t1,gene_07813.t1,gene_05330.t1,gene_03452.t1,gene_06117.t1,gene_00896.t1,gene_10474.t1,gene_01162.t1,gene_05142.t1,gene_07851.t1,gene_01828.t1,gene_04302.t1,gene_00949.t1,gene_00778.t1,gene_03123.t1,gene_06643.t1,gene_08051.t1,gene_01019.t1,gene_09263.t1,gene_02412.t1,gene_10370.t1,gene_03581.t1,gene_03944.t1,gene_08981.t1,gene_02175.t1,gene_00297.t1,gene_00280.t1,gene_09195.t1,gene_09469.t1,gene_03153.t1,gene_06451.t1,gene_04562.t1,gene_01790.t1,gene_09103.t1,gene_06102.t1,gene_01374.t1,gene_07884.t1,gene_01097.t1,gene_08804.t1,gene_02879.t1,gene_02228.t1,gene_05811.t1,gene_00665.t1,gene_02123.t1,gene_02715.t1,gene_07261.t1,gene_03652.t1,gene_04120.t1,gene_04412.t1,gene_09573.t1,gene_02647.t1,gene_07924.t1,gene_07988.t1,gene_04959.t1,gene_07366.t1,gene_10554.t1,gene_03199.t1,gene_09309.t1,gene_10503.t1,gene_07715.t1,gene_09843.t1,gene_09166.t1,gene_05820.t1,gene_06242.t1,gene_02025.t1,gene_04923.t1,gene_10369.t1,gene_00205.t1,gene_00355.t1,gene_08665.t1,gene_00857.t1,gene_00581.t1,gene_07129.t1,gene_02088.t1,gene_10016.t1,gene_09868.t1,gene_04509.t1,gene_07095.t1,gene_02577.t1,gene_06163.t1,gene_08324.t1,gene_03491.t1,gene_09471.t1,gene_08341.t1,gene_08500.t1,gene_04358.t1,gene_05849.t1,gene_09242.t1,gene_09231.t1,gene_10167.t1,gene_10446.t1,gene_01990.t1,gene_04457.t1,gene_04076.t1,gene_08455.t1,gene_10008.t1,gene_04063.t1,gene_06649.t1,gene_03351.t1,gene_09001.t1,gene_07396.t1,gene_03759.t1,gene_07217.t1,gene_04554.t1,gene_00548.t1,gene_05755.t1,gene_04413.t1,gene_02254.t1,gene_00597.t1,gene_03487.t1,gene_09082.t1,gene_09699.t1,gene_03660.t1,gene_09269.t1,gene_00706.t1,gene_01933.t1,gene_00982.t1,gene_03776.t1,gene_10213.t1,gene_07370.t1,gene_05056.t1,gene_01046.t1,gene_07416.t1,gene_09104.t1,gene_01198.t1,gene_05164.t1,gene_09271.t1,gene_07232.t1,gene_10289.t1,gene_03535.t1,gene_03461.t1,gene_07716.t1,gene_04316.t1,gene_00118.t1,gene_07202.t1,gene_05182.t1,gene_01540.t1,gene_03192.t1,gene_01706.t1,gene_01436.t1,gene_04631.t1,gene_03141.t1,gene_06256.t1,gene_03165.t1,gene_02250.t1,gene_00001.t1,gene_01043.t1,gene_04577.t1,gene_06273.t1,gene_09046.t1,gene_09710.t1,gene_00352.t1,gene_01283.t1,gene_09064.t1,gene_03475.t1,gene_07475.t1,gene_05671.t1,gene_02432.t1,gene_03931.t1,gene_02698.t1,gene_05855.t1,gene_02415.t1,gene_07626.t1,gene_01173.t1, | | ATP binding | molecular_function |

**Table S3 Detailed Gene Ontology (GO) classification of protein families in the genome of *P. paneum* OM1 (*Continued*)**

| **GO ID** | **Seq Num** | | **Seq List** | **GO term** | **Category** |
| --- | --- | --- | --- | --- | --- |
| GO:0005524 | 634 | gene_07402.t1,gene_07139.t1,gene_08132.t1,gene_06405.t1,gene_05467.t1,gene_09154.t1,gene_05285.t1,gene_02304.t1,gene_01221.t1,gene_00208.t1,gene_09581.t1,gene_01182.t1,gene_07821.t1,gene_05955.t1,gene_04634.t1,gene_05841.t1,gene_09207.t1,gene_02487.t1,gene_09111.t1 | | ATP binding | molecular_function |
| GO:0005525 | 108 | gene_03293.t1,gene_03793.t1,gene_01194.t1,gene_06785.t1,gene_04976.t1,gene_05525.t1,gene_09037.t1,gene_05374.t1,gene_04423.t1,gene_09005.t1,gene_03755.t1,gene_08048.t1,gene_08956.t1,gene_10469.t1,gene_09750.t1,gene_01668.t1,gene_02115.t1,gene_03006.t1,gene_02465.t1,gene_03671.t1,gene_06391.t1,gene_06104.t1,gene_09687.t1,gene_01509.t1,gene_06165.t1,gene_03121.t1,gene_03540.t1,gene_07127.t1,gene_10100.t1,gene_03716.t1,gene_00023.t1,gene_05660.t1,gene_07332.t1,gene_10558.t1,gene_01045.t1,gene_07243.t1,gene_08232.t1,gene_02503.t1,gene_09945.t1,gene_10286.t1,gene_01416.t1,gene_05145.t1,gene_05536.t1,gene_04397.t1,gene_06071.t1,gene_07812.t1,gene_10479.t1,gene_06448.t1,gene_01115.t1,gene_04201.t1,gene_09833.t1,gene_03919.t1,gene_08311.t1,gene_03653.t1,gene_08109.t1,gene_04198.t1,gene_03355.t1,gene_01861.t1,gene_08836.t1,gene_07449.t1,gene_00668.t1,gene_00417.t1,gene_06662.t1,gene_06121.t1,gene_01989.t1,gene_04169.t1,gene_03274.t1,gene_07936.t1,gene_03087.t1,gene_08027.t1,gene_10287.t1,gene_00015.t1,gene_09829.t1,gene_01545.t1,gene_08680.t1,gene_08080.t1,gene_08217.t1,gene_06609.t1,gene_04903.t1,gene_08588.t1,gene_01985.t1,gene_02046.t1,gene_09274.t1,gene_05165.t1,gene_03548.t1,gene_03725.t1,gene_00704.t1,gene_08179.t1,gene_03680.t1,gene_08770.t1,gene_08745.t1,gene_09488.t1,gene_03296.t1,gene_01019.t1,gene_03791.t1,gene_04146.t1,gene_02435.t1,gene_06153.t1,gene_01220.t1,gene_06879.t1,gene_04255.t1,gene_02957.t1,gene_06571.t1,gene_08913.t1,gene_01175.t1,gene_05151.t1,gene_10216.t1,gene_05803.t1 | | GTP binding | molecular_function |
| GO:0004129 | 2 | gene_07269.t1,gene_09108.t1 | | cytochrome-c oxidase activity | molecular_function |
| GO:0004128 | 2 | gene_06018.t1,gene_01626.t1 | | cytochrome-b5 reductase activity, acting on NAD(P)H | molecular_function |
| GO:0004121 | 1 | gene_01259.t1 | | cystathionine beta-lyase activity | molecular_function |
| GO:0004122 | 1 | gene_01192.t1 | | cystathionine beta-synthase activity | molecular_function |
| GO:0004127 | 1 | gene_06009.t1 | | cytidylate kinase activity | molecular_function |
| GO:0004126 | 1 | gene_05132.t1 | | cytidine deaminase activity | molecular_function |
| GO:0003825 | 1 | gene_10489.t1 | | alpha,alpha-trehalose-phosphate synthase (UDP-forming) activity | molecular_function |

**Table S3 Detailed Gene Ontology (GO) classification of protein families in the genome of *P. paneum* OM1 (*Continued*)**

| **GO ID** | **Seq Num** | | **Seq List** | **GO term** | **Category** |
| --- | --- | --- | --- | --- | --- |
| GO:0003824 | 97 | gene_03878.t1,gene_08475.t1,gene_00165.t1,gene_00462.t1,gene_08045.t1,gene_01360.t1,gene_00579.t1,gene_01399.t1,gene_00096.t1,gene_00541.t1,gene_03051.t1,gene_01491.t1,gene_07520.t1,gene_04085.t1,gene_07710.t1,gene_05713.t1,gene_04955.t1,gene_04496.t1,gene_08901.t1,gene_07328.t1,gene_09297.t1,gene_02511.t1,gene_03553.t1,gene_04762.t1,gene_04483.t1,gene_08733.t1,gene_07407.t1,gene_10066.t1,gene_07610.t1,gene_00901.t1,gene_08444.t1,gene_00164.t1,gene_06321.t1,gene_02065.t1,gene_04495.t1,gene_09942.t1,gene_09136.t1,gene_03964.t1,gene_08377.t1,gene_05456.t1,gene_10527.t1,gene_05945.t1,gene_06828.t1,gene_03315.t1,gene_04965.t1,gene_06983.t1,gene_05720.t1,gene_00540.t1,gene_10175.t1,gene_02184.t1,gene_09185.t1,gene_02832.t1,gene_04701.t1,gene_02018.t1,gene_03430.t1,gene_08474.t1,gene_00967.t1,gene_07341.t1,gene_01904.t1,gene_08584.t1,gene_00128.t1,gene_09524.t1,gene_04107.t1,gene_01024.t1,gene_09776.t1,gene_08194.t1,gene_01154.t1,gene_01681.t1,gene_04381.t1,gene_02276.t1,gene_06563.t1,gene_07233.t1,gene_03350.t1,gene_00103.t1,gene_00772.t1,gene_06493.t1,gene_00531.t1,gene_10447.t1,gene_03626.t1,gene_04774.t1,gene_02648.t1,gene_09557.t1,gene_01337.t1,gene_00623.t1,gene_07393.t1,gene_08556.t1,gene_08147.t1,gene_02036.t1,gene_05210.t1,gene_08118.t1,gene_00687.t1,gene_05063.t1,gene_01167.t1,gene_04964.t1,gene_02528.t1,gene_00314.t1,gene_01923.t1 | | catalytic activity | molecular_function |
| GO:0008308 | 1 | gene_00322.t1 | | voltage-gated anion channel activity | molecular_function |
| GO:0008094 | 4 | gene_09184.t1,gene_08889.t1,gene_05469.t1,gene_08341.t1 | | ATP-dependent activity, acting on DNA | molecular_function |
| GO:0008097 | 1 | gene_08736.t1 | | 5S rRNA binding | molecular_function |
| GO:0016835 | 2 | gene_08150.t1,gene_03440.t1 | | carbon-oxygen lyase activity | molecular_function |
| GO:0016836 | 3 | gene_02510.t1,gene_09528.t1,gene_04129.t1 | | hydro-lyase activity | molecular_function |
| GO:0016830 | 4 | gene_03988.t1,gene_03700.t1,gene_05675.t1,gene_06682.t1 | | carbon-carbon lyase activity | molecular_function |
| GO:0016831 | 9 | gene_01575.t1,gene_09908.t1,gene_02277.t1,gene_08350.t1,gene_05768.t1,gene_10373.t1,gene_09179.t1,gene_08855.t1,gene_00631.t1 | | carboxy-lyase activity | molecular_function |
| GO:0016832 | 2 | gene_09319.t1,gene_03085.t1 | | aldehyde-lyase activity | molecular_function |
| GO:0016833 | 1 | gene_08292.t1 | | oxo-acid-lyase activity | molecular_function |
| GO:0018738 | 1 | gene_04252.t1 | | S-formylglutathione hydrolase activity | molecular_function |
| GO:0102545 | 3 | gene_02894.t1,gene_07645.t1,gene_03380.t1 | | phosphatidyl phospholipase B activity | molecular_function |
| GO:0015288 | 2 | gene_00322.t1,gene_09709.t1 | | porin activity | molecular_function |

**Table S3 Detailed Gene Ontology (GO) classification of protein families in the genome of *P. paneum* OM1 (*Continued*)**

| **GO ID** | **Seq Num** | | **Seq List** | **GO term** | **Category** |
| --- | --- | --- | --- | --- | --- |
| GO:0003959 | 2 | gene_05358.t1,gene_07722.t1 | | NADPH dehydrogenase activity | molecular_function |
| GO:0003958 | 3 | gene_08094.t1,gene_06727.t1,gene_06489.t1 | | NADPH-hemoprotein reductase activity | molecular_function |
| GO:0003951 | 5 | gene_02351.t1,gene_09241.t1,gene_08920.t1,gene_07119.t1,gene_08533.t1 | | NAD+ kinase activity | molecular_function |
| GO:0003950 | 3 | gene_07267.t1,gene_08089.t1,gene_00229.t1 | | NAD+ ADP-ribosyltransferase activity | molecular_function |
| GO:0008233 | 21 | gene_03698.t1,gene_02486.t1,gene_03149.t1,gene_04048.t1,gene_05702.t1,gene_10451.t1,gene_09366.t1,gene_03050.t1,gene_00706.t1,gene_10045.t1,gene_07138.t1,gene_02420.t1,gene_04461.t1,gene_04246.t1,gene_03388.t1,gene_10392.t1,gene_05700.t1,gene_03622.t1,gene_01393.t1,gene_06138.t1,gene_02422.t1 | | peptidase activity | molecular_function |
| GO:0003952 | 1 | gene_07903.t1 | | NAD+ synthase (glutamine-hydrolyzing) activity | molecular_function |
| GO:0003955 | 1 | gene_00973.t1 | | NAD(P)H dehydrogenase (quinone) activity | molecular_function |
| GO:0003954 | 2 | gene_03273.t1,gene_02144.t1 | | NADH dehydrogenase activity | molecular_function |
| GO:0008237 | 17 | gene_02780.t1,gene_08097.t1,gene_02116.t1,gene_07761.t1,gene_04185.t1,gene_04165.t1,gene_05226.t1,gene_02805.t1,gene_06787.t1,gene_00863.t1,gene_04146.t1,gene_02743.t1,gene_01201.t1,gene_02840.t1,gene_04400.t1,gene_09936.t1,gene_05408.t1 | | metallopeptidase activity | molecular_function |
| GO:0043998 | 1 | gene_01433.t1 | | H2A histone acetyltransferase activity | molecular_function |
| GO:0051087 | 5 | gene_02544.t1,gene_04415.t1,gene_07388.t1,gene_10118.t1,gene_03945.t1 | | chaperone binding | molecular_function |
| GO:0051082 | 20 | gene_10136.t1,gene_02559.t1,gene_10423.t1,gene_03204.t1,gene_07139.t1,gene_04223.t1,gene_01533.t1,gene_00502.t1,gene_08085.t1,gene_08963.t1,gene_01682.t1,gene_05558.t1,gene_03193.t1,gene_06242.t1,gene_01918.t1,gene_03801.t1,gene_09414.t1,gene_04092.t1,gene_01128.t1,gene_00738.t1 | | unfolded protein binding | molecular_function |
| GO:0015377 | 1 | gene_01365.t1 | | cation:chloride symporter activity | molecular_function |
| GO:0042800 | 1 | gene_02360.t1 | | histone methyltransferase activity (H3-K4 specific) | molecular_function |
| GO:0042802 | 1 | gene_07381.t1 | | identical protein binding | molecular_function |
| GO:0042803 | 2 | gene_05883.t1,gene_03945.t1 | | protein homodimerization activity | molecular_function |
| GO:0008430 | 1 | gene_06409.t1 | | selenium binding | molecular_function |
| GO:0044183 | 1 | gene_07236.t1 | | protein folding chaperone | molecular_function |
| GO:0016712 | 2 | gene_02285.t1,gene_07956.t1 | | oxidoreductase activity, acting on paired donors, with incorporation or reduction of molecular oxygen, reduced flavin or flavoprotein as one donor, and incorporation of one atom of oxygen | molecular_function |

**Table S3 Detailed Gene Ontology (GO) classification of protein families in the genome of *P. paneum* OM1 (*Continued*)**

| **GO ID** | **Seq Num** | | **Seq List** | **GO term** | **Category** |
| --- | --- | --- | --- | --- | --- |
| GO:0015113 | 1 | gene_08725.t1 | | nitrite transmembrane transporter activity | molecular_function |
| GO:0110152 | 1 | gene_09702.t1 | | RNA NAD-cap (NAD-forming) hydrolase activity | molecular_function |
| GO:0061604 | 1 | gene_08455.t1 | | molybdopterin-synthase sulfurtransferase activity | molecular_function |
| GO:0004506 | 1 | gene_04541.t1 | | squalene monooxygenase activity | molecular_function |
| GO:0030234 | 5 | gene_07275.t1,gene_00979.t1,gene_05847.t1,gene_01479.t1,gene_03734.t1 | | enzyme regulator activity | molecular_function |
| GO:0004605 | 2 | gene_04100.t1,gene_02201.t1 | | phosphatidate cytidylyltransferase activity | molecular_function |
| GO:0019843 | 11 | gene_05192.t1,gene_04098.t1,gene_07619.t1,gene_03883.t1,gene_06874.t1,gene_07417.t1,gene_00702.t1,gene_03284.t1,gene_07288.t1,gene_06861.t1,gene_02479.t1 | | rRNA binding | molecular_function |
| GO:0030695 | 2 | gene_10161.t1,gene_00958.t1 | | GTPase regulator activity | molecular_function |
| GO:0030697 | 1 | gene_05875.t1 | | S-adenosylmethionine-dependent tRNA (m5U54) methyltransferase activity | molecular_function |
| GO:0008239 | 2 | gene_07140.t1,gene_09324.t1 | | dipeptidyl-peptidase activity | molecular_function |
| GO:0017061 | 1 | gene_03822.t1 | | S-methyl-5-thioadenosine phosphorylase activity | molecular_function |
| GO:0005085 | 23 | gene_08231.t1,gene_06283.t1,gene_09156.t1,gene_03189.t1,gene_08522.t1,gene_05829.t1,gene_10106.t1,gene_01064.t1,gene_05830.t1,gene_10286.t1,gene_07337.t1,gene_03010.t1,gene_10287.t1,gene_09341.t1,gene_04474.t1,gene_10560.t1,gene_07255.t1,gene_00619.t1,gene_10130.t1,gene_01559.t1,gene_06269.t1,gene_09397.t1,gene_01592.t1 | | guanyl-nucleotide exchange factor activity | molecular_function |
| GO:0009374 | 1 | gene_01374.t1 | | biotin binding | molecular_function |
| GO:0000225 | 1 | gene_06068.t1 | | N-acetylglucosaminylphosphatidylinositol deacetylase activity | molecular_function |
| GO:0035312 | 1 | gene_06740.t1 | | 5'-3' exodeoxyribonuclease activity | molecular_function |
| GO:0031369 | 5 | gene_10287.t1,gene_01354.t1,gene_05226.t1,gene_10286.t1,gene_00720.t1 | | translation initiation factor binding | molecular_function |
| GO:0004420 | 1 | gene_02693.t1 | | hydroxymethylglutaryl-CoA reductase (NADPH) activity | molecular_function |
| GO:0004421 | 1 | gene_03020.t1 | | hydroxymethylglutaryl-CoA synthase activity | molecular_function |
| GO:0004424 | 1 | gene_09625.t1 | | imidazoleglycerol-phosphate dehydratase activity | molecular_function |
| GO:0106073 | 1 | gene_07000.t1 | | dolichyl pyrophosphate Glc2Man9GlcNAc2 alpha-1,2-glucosyltransferase activity | molecular_function |
| GO:0016295 | 1 | gene_02332.t1 | | myristoyl-[acyl-carrier-protein] hydrolase activity | molecular_function |

**Table S3 Detailed Gene Ontology (GO) classification of protein families in the genome of *P. paneum* OM1 (*Continued*)**

| **GO ID** | **Seq Num** | | **Seq List** | **GO term** | **Category** |
| --- | --- | --- | --- | --- | --- |
| GO:0008235 | 6 | gene_01294.t1,gene_02533.t1,gene_01523.t1,gene_08193.t1,gene_01441.t1,gene_03019.t1 | | metalloexopeptidase activity | molecular_function |
| GO:0008234 | 4 | gene_07354.t1,gene_09087.t1,gene_09777.t1,gene_02560.t1 | | cysteine-type peptidase activity | molecular_function |
| GO:0008236 | 12 | gene_02286.t1,gene_04530.t1,gene_06378.t1,gene_07140.t1,gene_07401.t1,gene_01041.t1,gene_01428.t1,gene_00248.t1,gene_01916.t1,gene_00866.t1,gene_00779.t1,gene_00247.t1 | | serine-type peptidase activity | molecular_function |
| GO:0008934 | 2 | gene_05585.t1,gene_02349.t1 | | inositol monophosphate 1-phosphatase activity | molecular_function |
| GO:0005337 | 2 | gene_04064.t1,gene_10461.t1 | | nucleoside transmembrane transporter activity | molecular_function |
| GO:0019784 | 1 | gene_08524.t1 | | NEDD8-specific protease activity | molecular_function |
| GO:0036218 | 1 | gene_09266.t1 | | dTTP diphosphatase activity | molecular_function |
| GO:0004334 | 1 | gene_03810.t1 | | fumarylacetoacetase activity | molecular_function |
| GO:0004335 | 1 | gene_08593.t1 | | galactokinase activity | molecular_function |
| GO:0004332 | 1 | gene_03040.t1 | | fructose-bisphosphate aldolase activity | molecular_function |
| GO:0004333 | 1 | gene_00860.t1 | | fumarate hydratase activity | molecular_function |
| GO:0005247 | 3 | gene_07629.t1,gene_08410.t1,gene_01052.t1 | | voltage-gated chloride channel activity | molecular_function |
| GO:0005245 | 1 | gene_05625.t1 | | voltage-gated calcium channel activity | molecular_function |
| GO:0005244 | 1 | gene_08146.t1 | | voltage-gated ion channel activity | molecular_function |
| GO:0036402 | 6 | gene_02486.t1,gene_01236.t1,gene_07138.t1,gene_02420.t1,gene_04461.t1,gene_05700.t1 | | proteasome-activating activity | molecular_function |
| GO:0004339 | 1 | gene_05104.t1 | | glucan 1,4-alpha-glucosidase activity | molecular_function |
| GO:0005536 | 6 | gene_06196.t1,gene_09513.t1,gene_00838.t1,gene_09875.t1,gene_06480.t1,gene_06014.t1 | | glucose binding | molecular_function |
| GO:0004114 | 1 | gene_01703.t1 | | 3',5'-cyclic-nucleotide phosphodiesterase activity | molecular_function |
| GO:0004115 | 1 | gene_02073.t1 | | 3',5'-cyclic-AMP phosphodiesterase activity | molecular_function |
| GO:0102483 | 4 | gene_03630.t1,gene_06646.t1,gene_02981.t1,gene_08104.t1 | | scopolin beta-glucosidase activity | molecular_function |
| GO:0102953 | 2 | gene_08476.t1,gene_10334.t1 | | hypoglycin A gamma-glutamyl transpeptidase activity | molecular_function |
| GO:0031419 | 2 | gene_02543.t1,gene_09755.t1 | | cobalamin binding | molecular_function |
| GO:0031418 | 4 | gene_03106.t1,gene_08658.t1,gene_07708.t1,gene_00107.t1 | | L-ascorbic acid binding | molecular_function |

**Table S3 Detailed Gene Ontology (GO) classification of protein families in the genome of *P. paneum* OM1 (*Continued*)**

| **GO ID** | **Seq Num** | | **Seq List** | **GO term** | **Category** |
| --- | --- | --- | --- | --- | --- |
| GO:0000049 | 17 | gene_04329.t1,gene_04234.t1,gene_02682.t1,gene_05774.t1,gene_02330.t1,gene_09742.t1,gene_02254.t1,gene_00417.t1,gene_04722.t1,gene_01562.t1,gene_06698.t1,gene_10160.t1,gene_03944.t1,gene_00660.t1,gene_02187.t1,gene_06273.t1,gene_06212.t1 | | tRNA binding | molecular_function |
| GO:0046933 | 7 | gene_00280.t1,gene_08419.t1,gene_01009.t1,gene_01026.t1,gene_07605.t1,gene_07813.t1,gene_01754.t1 | | proton-transporting ATP synthase activity, rotational mechanism | molecular_function |
| GO:0016829 | 36 | gene_04197.t1,gene_02704.t1,gene_10404.t1,gene_00784.t1,gene_06166.t1,gene_00088.t1,gene_07561.t1,gene_04303.t1,gene_07984.t1,gene_07270.t1,gene_02150.t1,gene_05909.t1,gene_10652.t1,gene_06837.t1,gene_09527.t1,gene_02844.t1,gene_04404.t1,gene_10011.t1,gene_01839.t1,gene_03098.t1,gene_01840.t1,gene_00746.t1,gene_10580.t1,gene_03552.t1,gene_09132.t1,gene_06065.t1,gene_05961.t1,gene_07638.t1,gene_10080.t1,gene_07522.t1,gene_07724.t1,gene_01497.t1,gene_01036.t1,gene_01838.t1,gene_07472.t1,gene_00939.t1 | | lyase activity | molecular_function |
| GO:0102555 | 1 | gene_06846.t1 | | octanoyl transferase activity (acting on glycine-cleavage complex H protein) | molecular_function |
| GO:0004750 | 1 | gene_00043.t1 | | D-ribulose-phosphate 3-epimerase activity | molecular_function |
| GO:0004751 | 1 | gene_06446.t1 | | ribose-5-phosphate isomerase activity | molecular_function |
| GO:0004754 | 1 | gene_03038.t1 | | saccharopine dehydrogenase (NAD+, L-lysine-forming) activity | molecular_function |
| GO:0102552 | 1 | gene_06832.t1 | | lipoyl synthase activity (acting on glycine-cleavage complex H protein | molecular_function |
| GO:0004802 | 1 | gene_08827.t1 | | transketolase activity | molecular_function |
| GO:0015297 | 5 | gene_05596.t1,gene_05823.t1,gene_00188.t1,gene_06518.t1,gene_09522.t1 | | antiporter activity | molecular_function |
| GO:0016992 | 1 | gene_06832.t1 | | lipoate synthase activity | molecular_function |
| GO:0015293 | 4 | gene_07427.t1,gene_02884.t1,gene_06183.t1,gene_07824.t1 | | symporter activity | molecular_function |
| GO:0015299 | 5 | gene_03485.t1,gene_01260.t1,gene_05089.t1,gene_00744.t1,gene_04115.t1 | | solute:proton antiporter activity | molecular_function |
| GO:0004373 | 1 | gene_07867.t1 | | glycogen (starch) synthase activity | molecular_function |
| GO:0003968 | 2 | gene_08120.t1,gene_06857.t1 | | RNA-directed 5'-3' RNA polymerase activity | molecular_function |
| GO:0003964 | 2 | gene_06867.t1,gene_08777.t1 | | RNA-directed DNA polymerase activity | molecular_function |
| GO:0004807 | 2 | gene_00648.t1,gene_06111.t1 | | triose-phosphate isomerase activity | molecular_function |
| GO:0070773 | 1 | gene_04568.t1 | | protein-N-terminal glutamine amidohydrolase activity | molecular_function |

**Table S3 Detailed Gene Ontology (GO) classification of protein families in the genome of *P. paneum* OM1 (*Continued*)**

| **GO ID** | **Seq Num** | | **Seq List** | **GO term** | **Category** |
| --- | --- | --- | --- | --- | --- |
| GO:0106141 | 2 | gene_10375.t1,gene_00632.t1 | | flavin prenyltransferase activity | molecular_function |
| GO:0032266 | 3 | gene_06865.t1,gene_07435.t1,gene_01280.t1 | | phosphatidylinositol-3-phosphate binding | molecular_function |
| GO:0015369 | 5 | gene_01191.t1,gene_01593.t1,gene_06177.t1,gene_06176.t1,gene_06178.t1 | | calcium:proton antiporter activity | molecular_function |
| GO:0032041 | 3 | gene_02703.t1,gene_07759.t1,gene_02804.t1 | | NAD-dependent histone deacetylase activity (H3-K14 specific) | molecular_function |
| GO:0002161 | 5 | gene_07409.t1,gene_02254.t1,gene_09679.t1,gene_10446.t1,gene_04722.t1 | | aminoacyl-tRNA editing activity | molecular_function |
| GO:0061798 | 1 | gene_06655.t1 | | GTP 3',8'-cyclase activity | molecular_function |
| GO:0015450 | 1 | gene_07093.t1 | | protein-transporting ATPase activity | molecular_function |
| GO:0004475 | 13 | gene_10287.t1,gene_03793.t1,gene_10100.t1,gene_04976.t1,gene_03725.t1,gene_00023.t1,gene_05151.t1,gene_10469.t1,gene_01861.t1,gene_04903.t1,gene_10286.t1,gene_01115.t1,gene_03919.t1 | | mannose-1-phosphate guanylyltransferase activity | molecular_function |
| GO:0008444 | 1 | gene_08051.t1 | | CDP-diacylglycerol-glycerol-3-phosphate 3-phosphatidyltransferase activity | molecular_function |
| GO:0008441 | 1 | gene_03882.t1 | | 3'(2'),5'-bisphosphate nucleotidase activity | molecular_function |
| GO:0008448 | 1 | gene_09762.t1 | | N-acetylglucosamine-6-phosphate deacetylase activity | molecular_function |
| GO:0050155 | 1 | gene_02827.t1 | | ornithine(lysine) transaminase activity | molecular_function |
| GO:0015103 | 2 | gene_05596.t1,gene_00188.t1 | | inorganic anion transmembrane transporter activity | molecular_function |
| GO:0015109 | 1 | gene_10249.t1 | | chromate transmembrane transporter activity | molecular_function |
| GO:0034450 | 1 | gene_00376.t1 | | ubiquitin-ubiquitin ligase activity | molecular_function |
| GO:0019104 | 1 | gene_10200.t1 | | DNA N-glycosylase activity | molecular_function |
| GO:0032051 | 1 | gene_01372.t1 | | clathrin light chain binding | molecular_function |
| GO:0015039 | 1 | gene_07567.t1 | | NADPH-adrenodoxin reductase activity | molecular_function |
| GO:0015035 | 3 | gene_04277.t1,gene_01940.t1,gene_07528.t1 | | protein-disulfide reductase activity | molecular_function |
| GO:0004427 | 1 | gene_07215.t1 | | inorganic diphosphatase activity | molecular_function |
| GO:0003796 | 2 | gene_07692.t1,gene_01789.t1 | | lysozyme activity | molecular_function |
| GO:0030599 | 2 | gene_09474.t1,gene_06941.t1 | | pectinesterase activity | molecular_function |
| GO:0043333 | 1 | gene_03847.t1 | | 2-octaprenyl-6-methoxy-1,4-benzoquinone methylase activity | molecular_function |
| GO:0035673 | 13 | gene_09670.t1,gene_02335.t1,gene_06590.t1,gene_00051.t1,gene_03628.t1,gene_05487.t1,gene_05628.t1,gene_05629.t1,gene_04308.t1,gene_05929.t1,gene_08851.t1,gene_04138.t1,gene_07697.t1 | | oligopeptide transmembrane transporter activity | molecular_function |

**Table S3 Detailed Gene Ontology (GO) classification of protein families in the genome of *P. paneum* OM1 (*Continued*)**

| **GO ID** | **Seq Num** | | **Seq List** | **GO term** | **Category** |
| --- | --- | --- | --- | --- | --- |
| GO:0046975 | 1 | gene_09220.t1 | | histone methyltransferase activity (H3-K36 specific) | molecular_function |
| GO:0000309 | 2 | gene_03849.t1,gene_00373.t1 | | nicotinamide-nucleotide adenylyltransferase activity | molecular_function |
| GO:1990610 | 1 | gene_00361.t1 | | acetolactate synthase regulator activity | molecular_function |
| GO:0043813 | 1 | gene_06333.t1 | | phosphatidylinositol-3,5-bisphosphate 5-phosphatase activity | molecular_function |
| GO:0031176 | 2 | gene_10598.t1,gene_00132.t1 | | endo-1,4-beta-xylanase activity | molecular_function |
| GO:0031177 | 29 | gene_09801.t1,gene_07489.t1,gene_00173.t1,gene_05503.t1,gene_07895.t1,gene_08782.t1,gene_07415.t1,gene_01127.t1,gene_06013.t1,gene_00004.t1,gene_00239.t1,gene_08786.t1,gene_08783.t1,gene_09894.t1,gene_01784.t1,gene_00854.t1,gene_04024.t1,gene_05606.t1,gene_05500.t1,gene_01184.t1,gene_07847.t1,gene_08780.t1,gene_00534.t1,gene_08784.t1,gene_06478.t1,gene_05302.t1,gene_10072.t1,gene_01824.t1,gene_08787.t1 | | phosphopantetheine binding | molecular_function |
| GO:0009881 | 1 | gene_01792.t1 | | photoreceptor activity | molecular_function |
| GO:0003779 | 27 | gene_05990.t1,gene_03453.t1,gene_09267.t1,gene_04603.t1,gene_02382.t1,gene_06990.t1,gene_03932.t1,gene_08684.t1,gene_00218.t1,gene_08716.t1,gene_05913.t1,gene_09686.t1,gene_07381.t1,gene_05874.t1,gene_10032.t1,gene_00669.t1,gene_08417.t1,gene_07685.t1,gene_07743.t1,gene_03571.t1,gene_00367.t1,gene_00869.t1,gene_05146.t1,gene_03374.t1,gene_07272.t1,gene_06364.t1,gene_08752.t1 | | actin binding | molecular_function |
| GO:0043021 | 3 | gene_01431.t1,gene_00423.t1,gene_05207.t1 | | ribonucleoprotein complex binding | molecular_function |
| GO:0015112 | 1 | gene_08725.t1 | | nitrate transmembrane transporter activity | molecular_function |
| GO:0043023 | 4 | gene_06330.t1,gene_05374.t1,gene_09219.t1,gene_02227.t1 | | ribosomal large subunit binding | molecular_function |
| GO:0043022 | 11 | gene_08192.t1,gene_03313.t1,gene_01161.t1,gene_10320.t1,gene_07330.t1,gene_07206.t1,gene_03188.t1,gene_09037.t1,gene_09219.t1,gene_05374.t1,gene_01551.t1 | | ribosome binding | molecular_function |
| GO:0003774 | 7 | gene_03571.t1,gene_03046.t1,gene_08209.t1,gene_00218.t1,gene_09267.t1,gene_10520.t1,gene_03570.t1 | | cytoskeletal motor activity | molecular_function |
| GO:0003777 | 8 | gene_05738.t1,gene_07366.t1,gene_03452.t1,gene_04724.t1,gene_05745.t1,gene_10636.t1,gene_02766.t1,gene_00134.t1 | | microtubule motor activity | molecular_function |
| GO:0017070 | 2 | gene_02780.t1,gene_08079.t1 | | U6 snRNA binding | molecular_function |
| GO:0050023 | 1 | gene_00477.t1 | | L-fuconate dehydratase activity | molecular_function |
| GO:0004435 | 2 | gene_07148.t1,gene_08790.t1 | | phosphatidylinositol phospholipase C activity | molecular_function |
| GO:0004430 | 1 | gene_03580.t1 | | 1-phosphatidylinositol 4-kinase activity | molecular_function |

**Table S3 Detailed Gene Ontology (GO) classification of protein families in the genome of *P. paneum* OM1 (*Continued*)**

| **GO ID** | **Seq Num** | | **Seq List** | **GO term** | **Category** |
| --- | --- | --- | --- | --- | --- |
| GO:0035091 | 18 | gene_03881.t1,gene_05186.t1,gene_10425.t1,gene_03659.t1,gene_01211.t1,gene_02369.t1,gene_07324.t1,gene_01282.t1,gene_02165.t1,gene_03667.t1,gene_05389.t1,gene_03468.t1,gene_07161.t1,gene_06399.t1,gene_02853.t1,gene_08108.t1,gene_03137.t1,gene_10411.t1 | | phosphatidylinositol binding | molecular_function |
| GO:0030570 | 2 | gene_00945.t1,gene_08437.t1 | | pectate lyase activity | molecular_function |
| GO:0004439 | 1 | gene_07363.t1 | | phosphatidylinositol-4,5-bisphosphate 5-phosphatase activity | molecular_function |
| GO:0004438 | 1 | gene_02966.t1 | | phosphatidylinositol-3-phosphatase activity | molecular_function |
| GO:0045131 | 1 | gene_03076.t1 | | pre-mRNA branch point binding | molecular_function |
| GO:0003963 | 1 | gene_04512.t1 | | RNA-3'-phosphate cyclase activity | molecular_function |
| GO:0005344 | 1 | gene_03326.t1 | | oxygen carrier activity | molecular_function |
| GO:0008926 | 1 | gene_00578.t1 | | mannitol-1-phosphate 5-dehydrogenase activity | molecular_function |
| GO:0102769 | 1 | gene_04434.t1 | | dihydroceramide glucosyltransferase activity | molecular_function |
| GO:0004698 | 1 | gene_05820.t1 | | calcium-dependent protein kinase C activity | molecular_function |
| GO:2001070 | 1 | gene_05104.t1 | | starch binding | molecular_function |
| GO:0000166 | 34 | gene_09401.t1,gene_03242.t1,gene_00526.t1,gene_06309.t1,gene_04007.t1,gene_07165.t1,gene_08708.t1,gene_10662.t1,gene_05582.t1,gene_03928.t1,gene_06101.t1,gene_04702.t1,gene_03099.t1,gene_09419.t1,gene_06856.t1,gene_01610.t1,gene_01534.t1,gene_04330.t1,gene_03024.t1,gene_04187.t1,gene_09702.t1,gene_02686.t1,gene_04609.t1,gene_06775.t1,gene_06452.t1,gene_04266.t1,gene_10644.t1,gene_03200.t1,gene_00924.t1,gene_08901.t1,gene_09266.t1,gene_00595.t1,gene_06282.t1,gene_04454.t1 | | nucleotide binding | molecular_function |
| GO:0004322 | 1 | gene_09989.t1 | | ferroxidase activity | molecular_function |
| GO:0004321 | 1 | gene_02333.t1 | | fatty-acyl-CoA synthase activity | molecular_function |
| GO:0004320 | 1 | gene_02332.t1 | | oleoyl-[acyl-carrier-protein] hydrolase activity | molecular_function |
| GO:0004326 | 2 | gene_01409.t1,gene_00302.t1 | | tetrahydrofolylpolyglutamate synthase activity | molecular_function |
| GO:0004325 | 2 | gene_04538.t1,gene_09155.t1 | | ferrochelatase activity | molecular_function |

**Table S3 Detailed Gene Ontology (GO) classification of protein families in the genome of *P. paneum* OM1 (*Continued*)**

| **GO ID** | **Seq Num** | | **Seq List** | **GO term** | **Category** |
| --- | --- | --- | --- | --- | --- |
| GO:0005509 | 38 | gene_06880.t1,gene_05990.t1,gene_04249.t1,gene_04055.t1,gene_09598.t1,gene_05379.t1,gene_02641.t1,gene_00996.t1,gene_04603.t1,gene_03755.t1,gene_06811.t1,gene_10310.t1,gene_06206.t1,gene_05216.t1,gene_04058.t1,gene_02126.t1,gene_08332.t1,gene_00669.t1,gene_00456.t1,gene_04068.t1,gene_09821.t1,gene_04296.t1,gene_05378.t1,gene_02421.t1,gene_10063.t1,gene_00016.t1,gene_08790.t1,gene_10343.t1,gene_02817.t1,gene_09062.t1,gene_05853.t1,gene_10637.t1,gene_03515.t1,gene_10423.t1,gene_04047.t1,gene_05625.t1,gene_02125.t1,gene_08752.t1 | | calcium ion binding | molecular_function |
[truncated: 118,920 more chars]
