# Supplementary material for: Comparative genome analysis of patulin-producing Penicillium paneum OM1 isolated from pears
Source: PeerJ journal article supplement (doi:10.7717/peerj.19848), 2025-08-22
Supplement: SupplementaryTableS4.docx [file SupplementaryTableS4.docx]

**Table S4 Detailed information of genes encoding CAZymes in** **the genome of *P. paneum* OM1**

| **Family** | **SeqID** | **Domain** | **Class** | **Class information** | **Domain description** |
| --- | --- | --- | --- | --- | --- |
| AAs-  Total  68 | gene_01941.t1 | AA1.hmm | AAs | Auxiliary Activities | http://www.cazy.org/AA1.html |
| gene_02010.t1 | AA1.hmm | AAs | Auxiliary Activities | http://www.cazy.org/AA1.html |
| gene_05304.t1 | AA1.hmm | AAs | Auxiliary Activities | http://www.cazy.org/AA1.html |
| gene_08542.t1 | AA1.hmm | AAs | Auxiliary Activities | http://www.cazy.org/AA1.html |
| gene_09648.t1 | AA1.hmm | AAs | Auxiliary Activities | http://www.cazy.org/AA1.html |
| gene_05744.t1 | AA1_2.hmm | AAs | Auxiliary Activities | http://www.cazy.org/AA1_2.html |
| gene_07939.t1 | AA1_2.hmm | AAs | Auxiliary Activities | http://www.cazy.org/AA1_2.html |
| gene_04617.t1 | AA1_3.hmm | AAs | Auxiliary Activities | http://www.cazy.org/AA1_3.html |
| gene_06695.t1 | AA1_3.hmm | AAs | Auxiliary Activities | http://www.cazy.org/AA1_3.html |
| gene_08542.t1 | AA1_3.hmm | AAs | Auxiliary Activities | http://www.cazy.org/AA1_3.html |
| gene_09876.t1 | AA1_3.hmm | AAs | Auxiliary Activities | http://www.cazy.org/AA1_3.html |
| gene_04836.t1 | AA11.hmm | AAs | Auxiliary Activities | http://www.cazy.org/AA11.html |
| gene_04897.t1 | AA11.hmm | AAs | Auxiliary Activities | http://www.cazy.org/AA11.html |
| gene_06483.t1 | AA11.hmm | AAs | Auxiliary Activities | http://www.cazy.org/AA11.html |
| gene_07951.t1 | AA11.hmm | AAs | Auxiliary Activities | http://www.cazy.org/AA11.html |
| gene_01683.t1 | AA14.hmm | AAs | Auxiliary Activities | http://www.cazy.org/AA14.html |
| gene_02162.t1 | AA16.hmm | AAs | Auxiliary Activities | http://www.cazy.org/AA16.html |
| gene_02830.t1 | AA2.hmm | AAs | Auxiliary Activities | http://www.cazy.org/AA2.html |
| gene_10593.t1 | AA2.hmm | AAs | Auxiliary Activities | http://www.cazy.org/AA2.html |
| gene_09761.t1 | AA3.hmm | AAs | Auxiliary Activities | http://www.cazy.org/AA3.html |
| gene_10298.t1 | AA3.hmm | AAs | Auxiliary Activities | http://www.cazy.org/AA3.html |
| gene_06594.t1 | AA3_1.hmm | AAs | Auxiliary Activities | http://www.cazy.org/AA3_1.html |
| gene_07061.t1 | AA3_1.hmm | AAs | Auxiliary Activities | http://www.cazy.org/AA3_1.html |
| gene_00472.t1 | AA3_2.hmm | AAs | Auxiliary Activities | http://www.cazy.org/AA3_2.html |
| gene_00546.t1 | AA3_2.hmm | AAs | Auxiliary Activities | http://www.cazy.org/AA3_2.html |
| gene_01077.t1 | AA3_2.hmm | AAs | Auxiliary Activities | http://www.cazy.org/AA3_2.html |
| gene_01974.t1 | AA3_2.hmm | AAs | Auxiliary Activities | http://www.cazy.org/AA3_2.html |
| gene_03385.t1 | AA3_2.hmm | AAs | Auxiliary Activities | http://www.cazy.org/AA3_2.html |
| gene_04382.t1 | AA3_2.hmm | AAs | Auxiliary Activities | http://www.cazy.org/AA3_2.html |
| gene_04408.t1 | AA3_2.hmm | AAs | Auxiliary Activities | http://www.cazy.org/AA3_2.html |
| gene_05272.t1 | AA3_2.hmm | AAs | Auxiliary Activities | http://www.cazy.org/AA3_2.html |
| gene_05482.t1 | AA3_2.hmm | AAs | Auxiliary Activities | http://www.cazy.org/AA3_2.html |
| gene_08251.t1 | AA3_2.hmm | AAs | Auxiliary Activities | http://www.cazy.org/AA3_2.html |
| gene_09799.t1 | AA3_2.hmm | AAs | Auxiliary Activities | http://www.cazy.org/AA3_2.html |
| gene_09802.t1 | AA3_2.hmm | AAs | Auxiliary Activities | http://www.cazy.org/AA3_2.html |
| gene_09805.t1 | AA3_2.hmm | AAs | Auxiliary Activities | http://www.cazy.org/AA3_2.html |
|  | gene_09906.t1 | AA3_2.hmm | AAs | Auxiliary Activities | http://www.cazy.org/AA3_2.html |

**Table S4 Detailed information of genes encoding CAZymes in the genome of *P. paneum* OM1 (*Continued*)**

| **Family** | **SeqID** | **Domain** | **Class** | **Class information** | **Domain description** |
| --- | --- | --- | --- | --- | --- |
| AAs-  Total  68 | gene_09950.t1 | AA3_2.hmm | AAs | Auxiliary Activities | http://www.cazy.org/AA3_2.html |
| gene_10471.t1 | AA3_2.hmm | AAs | Auxiliary Activities | http://www.cazy.org/AA3_2.html |
| gene_03728.t1 | AA3_3.hmm | AAs | Auxiliary Activities | http://www.cazy.org/AA3_3.html |
| gene_06859.t1 | AA4.hmm | AAs | Auxiliary Activities | http://www.cazy.org/AA4.html |
| gene_01904.t1 | AA5_2.hmm | AAs | Auxiliary Activities | http://www.cazy.org/AA5_2.html |
| gene_00973.t1 | AA6.hmm | AAs | Auxiliary Activities | http://www.cazy.org/AA6.html |
| gene_00184.t1 | AA7.hmm | AAs | Auxiliary Activities | http://www.cazy.org/AA7.html |
| gene_00751.t1 | AA7.hmm | AAs | Auxiliary Activities | http://www.cazy.org/AA7.html |
| gene_00943.t1 | AA7.hmm | AAs | Auxiliary Activities | http://www.cazy.org/AA7.html |
| gene_01443.t1 | AA7.hmm | AAs | Auxiliary Activities | http://www.cazy.org/AA7.html |
| gene_02044.t1 | AA7.hmm | AAs | Auxiliary Activities | http://www.cazy.org/AA7.html |
| gene_02298.t1 | AA7.hmm | AAs | Auxiliary Activities | http://www.cazy.org/AA7.html |
| gene_02306.t1 | AA7.hmm | AAs | Auxiliary Activities | http://www.cazy.org/AA7.html |
| gene_03459.t1 | AA7.hmm | AAs | Auxiliary Activities | http://www.cazy.org/AA7.html |
| gene_04704.t1 | AA7.hmm | AAs | Auxiliary Activities | http://www.cazy.org/AA7.html |
| gene_05255.t1 | AA7.hmm | AAs | Auxiliary Activities | http://www.cazy.org/AA7.html |
| gene_05289.t1 | AA7.hmm | AAs | Auxiliary Activities | http://www.cazy.org/AA7.html |
| gene_06200.t1 | AA7.hmm | AAs | Auxiliary Activities | http://www.cazy.org/AA7.html |
| gene_06895.t1 | AA7.hmm | AAs | Auxiliary Activities | http://www.cazy.org/AA7.html |
| gene_08132.t1 | AA7.hmm | AAs | Auxiliary Activities | http://www.cazy.org/AA7.html |
| gene_08134.t1 | AA7.hmm | AAs | Auxiliary Activities | http://www.cazy.org/AA7.html |
| gene_08228.t1 | AA7.hmm | AAs | Auxiliary Activities | http://www.cazy.org/AA7.html |
| gene_08309.t1 | AA7.hmm | AAs | Auxiliary Activities | http://www.cazy.org/AA7.html |
| gene_09466.t1 | AA7.hmm | AAs | Auxiliary Activities | http://www.cazy.org/AA7.html |
| gene_09499.t1 | AA7.hmm | AAs | Auxiliary Activities | http://www.cazy.org/AA7.html |
| gene_09898.t1 | AA7.hmm | AAs | Auxiliary Activities | http://www.cazy.org/AA7.html |
| gene_06301.t1 | AA8.hmm | AAs | Auxiliary Activities | http://www.cazy.org/AA8.html |
| gene_07664.t1 | AA8.hmm | AAs | Auxiliary Activities | http://www.cazy.org/AA8.html |
| gene_01388.t1 | AA9.hmm | AAs | Auxiliary Activities | http://www.cazy.org/AA9.html |
| gene_03404.t1 | AA9.hmm | AAs | Auxiliary Activities | http://www.cazy.org/AA9.html |
| gene_08882.t1 | AA9.hmm | AAs | Auxiliary Activities | http://www.cazy.org/AA9.html |
| CBMs-  Total 9 | gene_05104.t1 | CBM20.hmm | CBMs | Carbohydrate-Binding Modules | http://www.cazy.org/CBM20.html |
| gene_03510.t1 | CBM21.hmm | CBMs | Carbohydrate-Binding Modules | http://www.cazy.org/CBM21.html |
| gene_03433.t1 | CBM24.hmm | CBMs | Carbohydrate-Binding Modules | http://www.cazy.org/CBM24.html |
| gene_09937.t1 | CBM24.hmm | CBMs | Carbohydrate-Binding Modules | http://www.cazy.org/CBM24.html |

**Table S4 Detailed information of genes encoding CAZymes in the genome of *P. paneum* OM1 (*Continued*)**

| **Family** | **SeqID** | **Domain** | **Class** | **Class information** | **Domain description** |
| --- | --- | --- | --- | --- | --- |
| CBMs-  Total 9 | gene_09937.t1 | CBM24.hmm | CBMs | Carbohydrate-Binding Modules | http://www.cazy.org/CBM24.html |
| gene_05084.t1 | CBM43.hmm | CBMs | Carbohydrate-Binding Modules | http://www.cazy.org/CBM43.html |
| gene_04571.t1 | CBM63.hmm | CBMs | Carbohydrate-Binding Modules | http://www.cazy.org/CBM63.html |
| gene_02816.t1 | CBM66.hmm | CBMs | Carbohydrate-Binding Modules | http://www.cazy.org/CBM66.html |
| gene_07142.t1 | CBM87.hmm | CBMs | Carbohydrate-Binding Modules | http://www.cazy.org/CBM87.html |
| CEs-  Total 21 | gene_04252.t1 | CE1.hmm | CEs | Carbohydrate Esterases | http://www.cazy.org/CE1.html |
| gene_05825.t1 | CE1.hmm | CEs | Carbohydrate Esterases | http://www.cazy.org/CE1.html |
| gene_07704.t1 | CE12.hmm | CEs | Carbohydrate Esterases | http://www.cazy.org/CE12.html |
| gene_09115.t1 | CE12.hmm | CEs | Carbohydrate Esterases | http://www.cazy.org/CE12.html |
| gene_00598.t1 | CE16.hmm | CEs | Carbohydrate Esterases | http://www.cazy.org/CE16.html |
| gene_02619.t1 | CE16.hmm | CEs | Carbohydrate Esterases | http://www.cazy.org/CE16.html |
| gene_03294.t1 | CE16.hmm | CEs | Carbohydrate Esterases | http://www.cazy.org/CE16.html |
| gene_07142.t1 | CE18.hmm | CEs | Carbohydrate Esterases | http://www.cazy.org/CE18.html |
| gene_07454.t1 | CE3.hmm | CEs | Carbohydrate Esterases | http://www.cazy.org/CE3.html |
| gene_04069.t1 | CE4.hmm | CEs | Carbohydrate Esterases | http://www.cazy.org/CE4.html |
| gene_04664.t1 | CE4.hmm | CEs | Carbohydrate Esterases | http://www.cazy.org/CE4.html |
| gene_04675.t1 | CE4.hmm | CEs | Carbohydrate Esterases | http://www.cazy.org/CE4.html |
| gene_06380.t1 | CE4.hmm | CEs | Carbohydrate Esterases | http://www.cazy.org/CE4.html |
| gene_06903.t1 | CE4.hmm | CEs | Carbohydrate Esterases | http://www.cazy.org/CE4.html |
| gene_07682.t1 | CE4.hmm | CEs | Carbohydrate Esterases | http://www.cazy.org/CE4.html |
| gene_07991.t1 | CE4.hmm | CEs | Carbohydrate Esterases | http://www.cazy.org/CE4.html |
| gene_02226.t1 | CE5.hmm | CEs | Carbohydrate Esterases | http://www.cazy.org/CE5.html |
| gene_06011.t1 | CE5.hmm | CEs | Carbohydrate Esterases | http://www.cazy.org/CE5.html |
| gene_06941.t1 | CE8.hmm | CEs | Carbohydrate Esterases | http://www.cazy.org/CE8.html |
| gene_09474.t1 | CE8.hmm | CEs | Carbohydrate Esterases | http://www.cazy.org/CE8.html |
| gene_09762.t1 | CE9.hmm | CEs | Carbohydrate Esterases | http://www.cazy.org/CE9.html |
| GHs-  Total  180 | gene_00394.t1 | GH1.hmm | GHs | Glycoside Hydrolases | http://www.cazy.org/GH1.html |
| gene_02102.t1 | GH1.hmm | GHs | Glycoside Hydrolases | http://www.cazy.org/GH1.html |
| gene_03420.t1 | GH1.hmm | GHs | Glycoside Hydrolases | http://www.cazy.org/GH1.html |
| gene_05651.t1 | GH1.hmm | GHs | Glycoside Hydrolases | http://www.cazy.org/GH1.html |
| gene_10598.t1 | GH10.hmm | GHs | Glycoside Hydrolases | http://www.cazy.org/GH10.html |
| gene_03402.t1 | GH105.hmm | GHs | Glycoside Hydrolases | http://www.cazy.org/GH105.html |
| gene_04454.t1 | GH109.hmm | GHs | Glycoside Hydrolases | http://www.cazy.org/GH109.html |
| gene_00132.t1 | GH11.hmm | GHs | Glycoside Hydrolases | http://www.cazy.org/GH11.html |
| gene_03912.t1 | GH114.hmm | GHs | Glycoside Hydrolases | http://www.cazy.org/GH114.html |

**Table S4 Detailed information of genes encoding CAZymes in the genome of *P. paneum* OM1 (*Continued*)**

| **Family** | **SeqID** | **Domain** | **Class** | **Class information** | **Domain description** |
| --- | --- | --- | --- | --- | --- |
| GHs-  Total  180 | gene_07143.t1 | GH114.hmm | GHs | Glycoside Hydrolases | http://www.cazy.org/GH114.html |
| gene_01578.t1 | GH12.hmm | GHs | Glycoside Hydrolases | http://www.cazy.org/GH12.html |
| gene_07226.t1 | GH12.hmm | GHs | Glycoside Hydrolases | http://www.cazy.org/GH12.html |
| gene_06341.t1 | GH125.hmm | GHs | Glycoside Hydrolases | http://www.cazy.org/GH125.html |
| gene_09987.t1 | GH128.hmm | GHs | Glycoside Hydrolases | http://www.cazy.org/GH128.html |
| gene_04047.t1 | GH13_1.hmm | GHs | Glycoside Hydrolases | http://www.cazy.org/GH13_1.html |
| gene_04296.t1 | GH13_1.hmm | GHs | Glycoside Hydrolases | http://www.cazy.org/GH13_1.html |
| gene_05379.t1 | GH13_1.hmm | GHs | Glycoside Hydrolases | http://www.cazy.org/GH13_1.html |
| gene_04297.t1 | GH13_22.hmm | GHs | Glycoside Hydrolases | http://www.cazy.org/GH13_22.html |
| gene_04297.t1 | GH13_22.hmm | GHs | Glycoside Hydrolases | http://www.cazy.org/GH13_22.html |
| gene_04526.t1 | GH13_22.hmm | GHs | Glycoside Hydrolases | http://www.cazy.org/GH13_22.html |
| gene_04526.t1 | GH13_22.hmm | GHs | Glycoside Hydrolases | http://www.cazy.org/GH13_22.html |
| gene_05380.t1 | GH13_22.hmm | GHs | Glycoside Hydrolases | http://www.cazy.org/GH13_22.html |
| gene_05380.t1 | GH13_22.hmm | GHs | Glycoside Hydrolases | http://www.cazy.org/GH13_22.html |
| gene_07022.t1 | GH13_22.hmm | GHs | Glycoside Hydrolases | http://www.cazy.org/GH13_22.html |
| gene_07022.t1 | GH13_22.hmm | GHs | Glycoside Hydrolases | http://www.cazy.org/GH13_22.html |
| gene_00709.t1 | GH13_25.hmm | GHs | Glycoside Hydrolases | http://www.cazy.org/GH13_25.html |
| gene_05720.t1 | GH13_40.hmm | GHs | Glycoside Hydrolases | http://www.cazy.org/GH13_40.html |
| gene_06929.t1 | GH13_40.hmm | GHs | Glycoside Hydrolases | http://www.cazy.org/GH13_40.html |
| gene_09538.t1 | GH13_40.hmm | GHs | Glycoside Hydrolases | http://www.cazy.org/GH13_40.html |
| gene_09942.t1 | GH13_40.hmm | GHs | Glycoside Hydrolases | http://www.cazy.org/GH13_40.html |
| gene_05378.t1 | GH13_5.hmm | GHs | Glycoside Hydrolases | http://www.cazy.org/GH13_5.html |
| gene_08420.t1 | GH13_8.hmm | GHs | Glycoside Hydrolases | http://www.cazy.org/GH13_8.html |
| gene_00067.t1 | GH131.hmm | GHs | Glycoside Hydrolases | http://www.cazy.org/GH131.html |
| gene_02222.t1 | GH132.hmm | GHs | Glycoside Hydrolases | http://www.cazy.org/GH132.html |
| gene_04287.t1 | GH132.hmm | GHs | Glycoside Hydrolases | http://www.cazy.org/GH132.html |
| gene_03835.t1 | GH135.hmm | GHs | Glycoside Hydrolases | http://www.cazy.org/GH135.html |
| gene_07144.t1 | GH135.hmm | GHs | Glycoside Hydrolases | http://www.cazy.org/GH135.html |
| gene_05575.t1 | GH146.hmm | GHs | Glycoside Hydrolases | http://www.cazy.org/GH146.html |
| gene_05104.t1 | GH15.hmm | GHs | Glycoside Hydrolases | http://www.cazy.org/GH15.html |
| gene_09783.t1 | GH15.hmm | GHs | Glycoside Hydrolases | http://www.cazy.org/GH15.html |
| gene_02442.t1 | GH154.hmm | GHs | Glycoside Hydrolases | http://www.cazy.org/GH154.html |
| gene_01032.t1 | GH16_1.hmm | GHs | Glycoside Hydrolases | http://www.cazy.org/GH16_1.html |
| gene_03444.t1 | GH16_1.hmm | GHs | Glycoside Hydrolases | http://www.cazy.org/GH16_1.html |
| gene_07562.t1 | GH16_1.hmm | GHs | Glycoside Hydrolases | http://www.cazy.org/GH16_1.html |
| gene_07809.t1 | GH16_1.hmm | GHs | Glycoside Hydrolases | http://www.cazy.org/GH16_1.html |
| gene_00100.t1 | GH16_18.hmm | GHs | Glycoside Hydrolases | http://www.cazy.org/GH16_18.html |

**Table S4 Detailed information of genes encoding CAZymes in the genome of *P. paneum* OM1 (*Continued*)**

| **Family** | **SeqID** | **Domain** | **Class** | **Class information** | **Domain description** |
| --- | --- | --- | --- | --- | --- |
| GHs-  Total  180 | gene_03591.t1 | GH16_18.hmm | GHs | Glycoside Hydrolases | http://www.cazy.org/GH16_18.html |
| gene_06645.t1 | GH16_18.hmm | GHs | Glycoside Hydrolases | http://www.cazy.org/GH16_18.html |
| gene_06726.t1 | GH16_18.hmm | GHs | Glycoside Hydrolases | http://www.cazy.org/GH16_18.html |
| gene_08927.t1 | GH16_18.hmm | GHs | Glycoside Hydrolases | http://www.cazy.org/GH16_18.html |
| gene_02770.t1 | GH16_19.hmm | GHs | Glycoside Hydrolases | http://www.cazy.org/GH16_19.html |
| gene_07652.t1 | GH16_2.hmm | GHs | Glycoside Hydrolases | http://www.cazy.org/GH16_2.html |
| gene_06149.t1 | GH16_22.hmm | GHs | Glycoside Hydrolases | http://www.cazy.org/GH16_22.html |
| gene_08993.t1 | GH16_3.hmm | GHs | Glycoside Hydrolases | http://www.cazy.org/GH16_3.html |
| gene_00396.t1 | GH162.hmm | GHs | Glycoside Hydrolases | http://www.cazy.org/GH162.html |
| gene_00260.t1 | GH17.hmm | GHs | Glycoside Hydrolases | http://www.cazy.org/GH17.html |
| gene_05610.t1 | GH17.hmm | GHs | Glycoside Hydrolases | http://www.cazy.org/GH17.html |
| gene_08200.t1 | GH17.hmm | GHs | Glycoside Hydrolases | http://www.cazy.org/GH17.html |
| gene_10304.t1 | GH17.hmm | GHs | Glycoside Hydrolases | http://www.cazy.org/GH17.html |
| gene_00971.t1 | GH18.hmm | GHs | Glycoside Hydrolases | http://www.cazy.org/GH18.html |
| gene_01647.t1 | GH18.hmm | GHs | Glycoside Hydrolases | http://www.cazy.org/GH18.html |
| gene_01797.t1 | GH18.hmm | GHs | Glycoside Hydrolases | http://www.cazy.org/GH18.html |
| gene_04222.t1 | GH18.hmm | GHs | Glycoside Hydrolases | http://www.cazy.org/GH18.html |
| gene_04380.t1 | GH18.hmm | GHs | Glycoside Hydrolases | http://www.cazy.org/GH18.html |
| gene_05417.t1 | GH18.hmm | GHs | Glycoside Hydrolases | http://www.cazy.org/GH18.html |
| gene_05687.t1 | GH18.hmm | GHs | Glycoside Hydrolases | http://www.cazy.org/GH18.html |
| gene_06552.t1 | GH18.hmm | GHs | Glycoside Hydrolases | http://www.cazy.org/GH18.html |
| gene_06897.t1 | GH18.hmm | GHs | Glycoside Hydrolases | http://www.cazy.org/GH18.html |
| gene_07875.t1 | GH18.hmm | GHs | Glycoside Hydrolases | http://www.cazy.org/GH18.html |
| gene_09962.t1 | GH18.hmm | GHs | Glycoside Hydrolases | http://www.cazy.org/GH18.html |
| gene_10573.t1 | GH18.hmm | GHs | Glycoside Hydrolases | http://www.cazy.org/GH18.html |
| gene_02920.t1 | GH2.hmm | GHs | Glycoside Hydrolases | http://www.cazy.org/GH2.html |
| gene_03424.t1 | GH2.hmm | GHs | Glycoside Hydrolases | http://www.cazy.org/GH2.html |
| gene_03569.t1 | GH2.hmm | GHs | Glycoside Hydrolases | http://www.cazy.org/GH2.html |
| gene_04731.t1 | GH2.hmm | GHs | Glycoside Hydrolases | http://www.cazy.org/GH2.html |
| gene_00936.t1 | GH20.hmm | GHs | Glycoside Hydrolases | http://www.cazy.org/GH20.html |
| gene_07473.t1 | GH20.hmm | GHs | Glycoside Hydrolases | http://www.cazy.org/GH20.html |
| gene_01789.t1 | GH24.hmm | GHs | Glycoside Hydrolases | http://www.cazy.org/GH24.html |
| gene_07692.t1 | GH25.hmm | GHs | Glycoside Hydrolases | http://www.cazy.org/GH25.html |
| gene_07788.t1 | GH27.hmm | GHs | Glycoside Hydrolases | http://www.cazy.org/GH27.html |
| gene_00523.t1 | GH28.hmm | GHs | Glycoside Hydrolases | http://www.cazy.org/GH28.html |
| gene_00787.t1 | GH28.hmm | GHs | Glycoside Hydrolases | http://www.cazy.org/GH28.html |
|  | gene_01725.t1 | GH28.hmm | GHs | Glycoside Hydrolases | http://www.cazy.org/GH28.html |

**Table S4 Detailed information of genes encoding CAZymes in the genome of *P. paneum* OM1 (*Continued*)**

| **Family** | **SeqID** | **Domain** | **Class** | **Class information** | **Domain description** |
| --- | --- | --- | --- | --- | --- |
| GHs-  Total  180 | gene_02551.t1 | GH28.hmm | GHs | Glycoside Hydrolases | http://www.cazy.org/GH28.html |
| gene_05091.t1 | GH28.hmm | GHs | Glycoside Hydrolases | http://www.cazy.org/GH28.html |
| gene_09475.t1 | GH28.hmm | GHs | Glycoside Hydrolases | http://www.cazy.org/GH28.html |
| gene_00176.t1 | GH3.hmm | GHs | Glycoside Hydrolases | http://www.cazy.org/GH3.html |
| gene_02981.t1 | GH3.hmm | GHs | Glycoside Hydrolases | http://www.cazy.org/GH3.html |
| gene_03030.t1 | GH3.hmm | GHs | Glycoside Hydrolases | http://www.cazy.org/GH3.html |
| gene_03630.t1 | GH3.hmm | GHs | Glycoside Hydrolases | http://www.cazy.org/GH3.html |
| gene_04464.t1 | GH3.hmm | GHs | Glycoside Hydrolases | http://www.cazy.org/GH3.html |
| gene_07460.t1 | GH3.hmm | GHs | Glycoside Hydrolases | http://www.cazy.org/GH3.html |
| gene_08104.t1 | GH3.hmm | GHs | Glycoside Hydrolases | http://www.cazy.org/GH3.html |
| gene_09452.t1 | GH3.hmm | GHs | Glycoside Hydrolases | http://www.cazy.org/GH3.html |
| gene_09758.t1 | GH3.hmm | GHs | Glycoside Hydrolases | http://www.cazy.org/GH3.html |
| gene_04370.t1 | GH30_3.hmm | GHs | Glycoside Hydrolases | http://www.cazy.org/GH30_3.html |
| gene_01013.t1 | GH31.hmm | GHs | Glycoside Hydrolases | http://www.cazy.org/GH31.html |
| gene_04046.t1 | GH31.hmm | GHs | Glycoside Hydrolases | http://www.cazy.org/GH31.html |
| gene_06646.t1 | GH31.hmm | GHs | Glycoside Hydrolases | http://www.cazy.org/GH31.html |
| gene_06681.t1 | GH31.hmm | GHs | Glycoside Hydrolases | http://www.cazy.org/GH31.html |
| gene_07881.t1 | GH31.hmm | GHs | Glycoside Hydrolases | http://www.cazy.org/GH31.html |
| gene_09816.t1 | GH31.hmm | GHs | Glycoside Hydrolases | http://www.cazy.org/GH31.html |
| gene_09941.t1 | GH31.hmm | GHs | Glycoside Hydrolases | http://www.cazy.org/GH31.html |
| gene_00950.t1 | GH32.hmm | GHs | Glycoside Hydrolases | http://www.cazy.org/GH32.html |
| gene_01835.t1 | GH32.hmm | GHs | Glycoside Hydrolases | http://www.cazy.org/GH32.html |
| gene_02284.t1 | GH32.hmm | GHs | Glycoside Hydrolases | http://www.cazy.org/GH32.html |
| gene_07770.t1 | GH32.hmm | GHs | Glycoside Hydrolases | http://www.cazy.org/GH32.html |
| gene_09695.t1 | GH32.hmm | GHs | Glycoside Hydrolases | http://www.cazy.org/GH32.html |
| gene_02188.t1 | GH35.hmm | GHs | Glycoside Hydrolases | http://www.cazy.org/GH35.html |
| gene_02403.t1 | GH35.hmm | GHs | Glycoside Hydrolases | http://www.cazy.org/GH35.html |
| gene_06442.t1 | GH36.hmm | GHs | Glycoside Hydrolases | http://www.cazy.org/GH36.html |
| gene_10343.t1 | GH37.hmm | GHs | Glycoside Hydrolases | http://www.cazy.org/GH37.html |
| gene_07184.t1 | GH38.hmm | GHs | Glycoside Hydrolases | http://www.cazy.org/GH38.html |
| gene_07399.t1 | GH43_1.hmm | GHs | Glycoside Hydrolases | http://www.cazy.org/GH43_1.html |
| gene_09138.t1 | GH43_13.hmm | GHs | Glycoside Hydrolases | http://www.cazy.org/GH43_13.html |
| gene_00119.t1 | GH43_30.hmm | GHs | Glycoside Hydrolases | http://www.cazy.org/GH43_30.html |
| gene_08223.t1 | GH43_30.hmm | GHs | Glycoside Hydrolases | http://www.cazy.org/GH43_30.html |
| gene_03467.t1 | GH43_6.hmm | GHs | Glycoside Hydrolases | http://www.cazy.org/GH43_6.html |
| gene_03663.t1 | GH43_6.hmm | GHs | Glycoside Hydrolases | http://www.cazy.org/GH43_6.html |
| gene_06731.t1 | GH43_6.hmm | GHs | Glycoside Hydrolases | http://www.cazy.org/GH43_6.html |

**Table S4 Detailed information of genes encoding CAZymes in the genome of *P. paneum* OM1 (*Continued*)**

| **Family** | **SeqID** | **Domain** | **Class** | **Class information** | **Domain description** |
| --- | --- | --- | --- | --- | --- |
| GHs-  Total  180 | gene_09125.t1 | GH43_6.hmm | GHs | Glycoside Hydrolases | http://www.cazy.org/GH43_6.html |
| gene_02125.t1 | GH47.hmm | GHs | Glycoside Hydrolases | http://www.cazy.org/GH47.html |
| gene_02421.t1 | GH47.hmm | GHs | Glycoside Hydrolases | http://www.cazy.org/GH47.html |
| gene_02817.t1 | GH47.hmm | GHs | Glycoside Hydrolases | http://www.cazy.org/GH47.html |
| gene_04055.t1 | GH47.hmm | GHs | Glycoside Hydrolases | http://www.cazy.org/GH47.html |
| gene_08332.t1 | GH47.hmm | GHs | Glycoside Hydrolases | http://www.cazy.org/GH47.html |
| gene_10310.t1 | GH47.hmm | GHs | Glycoside Hydrolases | http://www.cazy.org/GH47.html |
| gene_05722.t1 | GH49.hmm | GHs | Glycoside Hydrolases | http://www.cazy.org/GH49.html |
| gene_06777.t1 | GH5_12.hmm | GHs | Glycoside Hydrolases | http://www.cazy.org/GH5_12.html |
| gene_01759.t1 | GH5_15.hmm | GHs | Glycoside Hydrolases | http://www.cazy.org/GH5_15.html |
| gene_04322.t1 | GH5_22.hmm | GHs | Glycoside Hydrolases | http://www.cazy.org/GH5_22.html |
| gene_00439.t1 | GH5_5.hmm | GHs | Glycoside Hydrolases | http://www.cazy.org/GH5_5.html |
| gene_01845.t1 | GH5_5.hmm | GHs | Glycoside Hydrolases | http://www.cazy.org/GH5_5.html |
| gene_02620.t1 | GH5_5.hmm | GHs | Glycoside Hydrolases | http://www.cazy.org/GH5_5.html |
| gene_04755.t1 | GH5_7.hmm | GHs | Glycoside Hydrolases | http://www.cazy.org/GH5_7.html |
| gene_02922.t1 | GH5_9.hmm | GHs | Glycoside Hydrolases | http://www.cazy.org/GH5_9.html |
| gene_03902.t1 | GH5_9.hmm | GHs | Glycoside Hydrolases | http://www.cazy.org/GH5_9.html |
| gene_05400.t1 | GH51.hmm | GHs | Glycoside Hydrolases | http://www.cazy.org/GH51.html |
| gene_02150.t1 | GH55.hmm | GHs | Glycoside Hydrolases | http://www.cazy.org/GH55.html |
| gene_02150.t1 | GH55.hmm | GHs | Glycoside Hydrolases | http://www.cazy.org/GH55.html |
| gene_03332.t1 | GH55.hmm | GHs | Glycoside Hydrolases | http://www.cazy.org/GH55.html |
| gene_10546.t1 | GH55.hmm | GHs | Glycoside Hydrolases | http://www.cazy.org/GH55.html |
| gene_05405.t1 | GH6.hmm | GHs | Glycoside Hydrolases | http://www.cazy.org/GH6.html |
| gene_09534.t1 | GH63.hmm | GHs | Glycoside Hydrolases | http://www.cazy.org/GH63.html |
| gene_02877.t1 | GH64.hmm | GHs | Glycoside Hydrolases | http://www.cazy.org/GH64.html |
| gene_02271.t1 | GH65.hmm | GHs | Glycoside Hydrolases | http://www.cazy.org/GH65.html |
| gene_08100.t1 | GH67.hmm | GHs | Glycoside Hydrolases | http://www.cazy.org/GH67.html |
| gene_01844.t1 | GH7.hmm | GHs | Glycoside Hydrolases | http://www.cazy.org/GH7.html |
| gene_02670.t1 | GH7.hmm | GHs | Glycoside Hydrolases | http://www.cazy.org/GH7.html |
| gene_02590.t1 | GH71.hmm | GHs | Glycoside Hydrolases | http://www.cazy.org/GH71.html |
| gene_03433.t1 | GH71.hmm | GHs | Glycoside Hydrolases | http://www.cazy.org/GH71.html |
| gene_03934.t1 | GH71.hmm | GHs | Glycoside Hydrolases | http://www.cazy.org/GH71.html |
| gene_08861.t1 | GH71.hmm | GHs | Glycoside Hydrolases | http://www.cazy.org/GH71.html |
| gene_09937.t1 | GH71.hmm | GHs | Glycoside Hydrolases | http://www.cazy.org/GH71.html |
| gene_05084.t1 | GH72.hmm | GHs | Glycoside Hydrolases | http://www.cazy.org/GH72.html |
| gene_06546.t1 | GH72.hmm | GHs | Glycoside Hydrolases | http://www.cazy.org/GH72.html |
| gene_06968.t1 | GH72.hmm | GHs | Glycoside Hydrolases | http://www.cazy.org/GH72.html |

**Table S4 Detailed information of genes encoding CAZymes in the genome of *P. paneum* OM1 (*Continued*)**

| **Family** | **SeqID** | **Domain** | **Class** | **Class information** | **Domain description** |
| --- | --- | --- | --- | --- | --- |
| GHs-  Total  180 | gene_08982.t1 | GH72.hmm | GHs | Glycoside Hydrolases | http://www.cazy.org/GH72.html |
| gene_09468.t1 | GH72.hmm | GHs | Glycoside Hydrolases | http://www.cazy.org/GH72.html |
| gene_09807.t1 | GH72.hmm | GHs | Glycoside Hydrolases | http://www.cazy.org/GH72.html |
| gene_03906.t1 | GH75.hmm | GHs | Glycoside Hydrolases | http://www.cazy.org/GH75.html |
| gene_00739.t1 | GH76.hmm | GHs | Glycoside Hydrolases | http://www.cazy.org/GH76.html |
| gene_01644.t1 | GH76.hmm | GHs | Glycoside Hydrolases | http://www.cazy.org/GH76.html |
| gene_02791.t1 | GH76.hmm | GHs | Glycoside Hydrolases | http://www.cazy.org/GH76.html |
| gene_03422.t1 | GH76.hmm | GHs | Glycoside Hydrolases | http://www.cazy.org/GH76.html |
| gene_03426.t1 | GH76.hmm | GHs | Glycoside Hydrolases | http://www.cazy.org/GH76.html |
| gene_05243.t1 | GH76.hmm | GHs | Glycoside Hydrolases | http://www.cazy.org/GH76.html |
| gene_08370.t1 | GH76.hmm | GHs | Glycoside Hydrolases | http://www.cazy.org/GH76.html |
| gene_08469.t1 | GH76.hmm | GHs | Glycoside Hydrolases | http://www.cazy.org/GH76.html |
| gene_02548.t1 | GH78.hmm | GHs | Glycoside Hydrolases | http://www.cazy.org/GH78.html |
| gene_01601.t1 | GH81.hmm | GHs | Glycoside Hydrolases | http://www.cazy.org/GH81.html |
| gene_03839.t1 | GH84.hmm | GHs | Glycoside Hydrolases | http://www.cazy.org/GH84.html |
| gene_00082.t1 | GH92.hmm | GHs | Glycoside Hydrolases | http://www.cazy.org/GH92.html |
| gene_05571.t1 | GH92.hmm | GHs | Glycoside Hydrolases | http://www.cazy.org/GH92.html |
| gene_08481.t1 | GH92.hmm | GHs | Glycoside Hydrolases | http://www.cazy.org/GH92.html |
| gene_10612.t1 | GH92.hmm | GHs | Glycoside Hydrolases | http://www.cazy.org/GH92.html |
| gene_02816.t1 | GH93.hmm | GHs | Glycoside Hydrolases | http://www.cazy.org/GH93.html |
| gene_02984.t1 | GH93.hmm | GHs | Glycoside Hydrolases | http://www.cazy.org/GH93.html |
| gene_05072.t1 | GH93.hmm | GHs | Glycoside Hydrolases | http://www.cazy.org/GH93.html |
| gene_05650.t1 | GH95.hmm | GHs | Glycoside Hydrolases | <http://www.cazy.org/>GH95.html |
| GTs-  Total 88 | gene_00199.t1 | GT1.hmm | GTs | GlycosyTransferases | http://www.cazy.org/GT1.html |
| gene_03179.t1 | GT1.hmm | GTs | GlycosyTransferases | http://www.cazy.org/GT1.html |
| gene_07177.t1 | GT1.hmm | GTs | GlycosyTransferases | http://www.cazy.org/GT1.html |
| gene_07540.t1 | GT1.hmm | GTs | GlycosyTransferases | http://www.cazy.org/GT1.html |
| gene_07845.t1 | GT1.hmm | GTs | GlycosyTransferases | http://www.cazy.org/GT1.html |
| gene_00571.t1 | GT109.hmm | GTs | GlycosyTransferases | http://www.cazy.org/GT109.html |
| gene_08128.t1 | GT109.hmm | GTs | GlycosyTransferases | http://www.cazy.org/GT109.html |
| gene_05800.t1 | GT15.hmm | GTs | GlycosyTransferases | http://www.cazy.org/GT15.html |
| gene_08160.t1 | GT15.hmm | GTs | GlycosyTransferases | http://www.cazy.org/GT15.html |
| gene_08395.t1 | GT15.hmm | GTs | GlycosyTransferases | http://www.cazy.org/GT15.html |
| gene_00810.t1 | GT2_Chitin_synth_1.hmm | GTs | GlycosyTransferases | http://www.cazy.org/GT2.html |
| gene_01290.t1 | GT2_Chitin_synth_1.hmm | GTs | GlycosyTransferases | http://www.cazy.org/GT2.html |
| gene_07068.t1 | GT2_Chitin_synth_1.hmm | GTs | GlycosyTransferases | http://www.cazy.org/GT2.html |

**Table S4 Detailed information of genes encoding CAZymes in the genome of *P. paneum* OM1 (*Continued*)**

| **Family** | **SeqID** | **Domain** | **Class** | **Class information** | **Domain description** |
| --- | --- | --- | --- | --- | --- |
| GTs-  Total 88 | gene_09106.t1 | GT2_Chitin_synth_1.hmm | GTs | GlycosyTransferases | http://www.cazy.org/GT2.html |
| gene_10650.t1 | GT2_Chitin_synth_1.hmm | GTs | GlycosyTransferases | http://www.cazy.org/GT2.html |
| gene_00224.t1 | GT2_Chitin_synth_2.hmm | GTs | GlycosyTransferases | http://www.cazy.org/GT2.html |
| gene_03570.t1 | GT2_Chitin_synth_2.hmm | GTs | GlycosyTransferases | http://www.cazy.org/GT2.html |
| gene_03571.t1 | GT2_Chitin_synth_2.hmm | GTs | GlycosyTransferases | http://www.cazy.org/GT2.html |
| gene_07068.t1 | GT2_Chitin_synth_2.hmm | GTs | GlycosyTransferases | http://www.cazy.org/GT2.html |
| gene_08876.t1 | GT2_Chitin_synth_2.hmm | GTs | GlycosyTransferases | http://www.cazy.org/GT2.html |
| gene_09106.t1 | GT2_Chitin_synth_2.hmm | GTs | GlycosyTransferases | http://www.cazy.org/GT2.html |
| gene_07227.t1 | GT2_Glyco_tranf_2_3.hmm | GTs | GlycosyTransferases | http://www.cazy.org/GT2.html |
| gene_08318.t1 | GT2_Glyco_tranf_2_3.hmm | GTs | GlycosyTransferases | http://www.cazy.org/GT2.html |
| gene_00808.t1 | GT2_Glyco_trans_2_3.hmm | GTs | GlycosyTransferases | http://www.cazy.org/GT2.html |
| gene_04592.t1 | GT2_Glycos_transf_2.hmm | GTs | GlycosyTransferases | http://www.cazy.org/GT2.html |
| gene_08604.t1 | GT2_Glycos_transf_2.hmm | GTs | GlycosyTransferases | http://www.cazy.org/GT2.html |
| gene_02593.t1 | GT20.hmm | GTs | GlycosyTransferases | http://www.cazy.org/GT20.html |
| gene_03347.t1 | GT20.hmm | GTs | GlycosyTransferases | http://www.cazy.org/GT20.html |
| gene_06003.t1 | GT20.hmm | GTs | GlycosyTransferases | http://www.cazy.org/GT20.html |
| gene_07341.t1 | GT20.hmm | GTs | GlycosyTransferases | http://www.cazy.org/GT20.html |
| gene_07447.t1 | GT20.hmm | GTs | GlycosyTransferases | http://www.cazy.org/GT20.html |
| gene_10489.t1 | GT20.hmm | GTs | GlycosyTransferases | http://www.cazy.org/GT20.html |
| gene_04434.t1 | GT21.hmm | GTs | GlycosyTransferases | http://www.cazy.org/GT21.html |
| gene_02233.t1 | GT22.hmm | GTs | GlycosyTransferases | http://www.cazy.org/GT22.html |
| gene_02828.t1 | GT22.hmm | GTs | GlycosyTransferases | http://www.cazy.org/GT22.html |
| gene_09213.t1 | GT22.hmm | GTs | GlycosyTransferases | http://www.cazy.org/GT22.html |
| gene_10419.t1 | GT22.hmm | GTs | GlycosyTransferases | http://www.cazy.org/GT22.html |
| gene_03162.t1 | GT24.hmm | GTs | GlycosyTransferases | http://www.cazy.org/GT24.html |
| gene_00154.t1 | GT25.hmm | GTs | GlycosyTransferases | http://www.cazy.org/GT25.html |
| gene_00295.t1 | GT25.hmm | GTs | GlycosyTransferases | http://www.cazy.org/GT25.html |
| gene_09974.t1 | GT25.hmm | GTs | GlycosyTransferases | http://www.cazy.org/GT25.html |
| gene_07867.t1 | GT3.hmm | GTs | GlycosyTransferases | http://www.cazy.org/GT3.html |
| gene_00389.t1 | GT32.hmm | GTs | GlycosyTransferases | http://www.cazy.org/GT32.html |
| gene_03632.t1 | GT32.hmm | GTs | GlycosyTransferases | http://www.cazy.org/GT32.html |
| gene_04359.t1 | GT32.hmm | GTs | GlycosyTransferases | http://www.cazy.org/GT32.html |

**Table S4 Detailed information of genes encoding CAZymes in the genome of *P. paneum* OM1 (*Continued*)**

| **Family** | **SeqID** | **Domain** | **Class** | **Class information** | **Domain description** |
| --- | --- | --- | --- | --- | --- |
| GTs-  Total 88 | gene_08226.t1 | GT32.hmm | GTs | GlycosyTransferases | http://www.cazy.org/GT32.html |
| gene_09623.t1 | GT32.hmm | GTs | GlycosyTransferases | http://www.cazy.org/GT32.html |
| gene_10632.t1 | GT33.hmm | GTs | GlycosyTransferases | http://www.cazy.org/GT33.html |
| gene_00090.t1 | GT34.hmm | GTs | GlycosyTransferases | http://www.cazy.org/GT34.html |
| gene_10012.t1 | GT34.hmm | GTs | GlycosyTransferases | http://www.cazy.org/GT34.html |
| gene_08743.t1 | GT35.hmm | GTs | GlycosyTransferases | http://www.cazy.org/GT35.html |
| gene_04168.t1 | GT39.hmm | GTs | GlycosyTransferases | http://www.cazy.org/GT39.html |
| gene_05987.t1 | GT39.hmm | GTs | GlycosyTransferases | http://www.cazy.org/GT39.html |
| gene_07257.t1 | GT39.hmm | GTs | GlycosyTransferases | http://www.cazy.org/GT39.html |
| gene_02462.t1 | GT4.hmm | GTs | GlycosyTransferases | http://www.cazy.org/GT4.html |
| gene_03124.t1 | GT4.hmm | GTs | GlycosyTransferases | http://www.cazy.org/GT4.html |
| gene_05746.t1 | GT4.hmm | GTs | GlycosyTransferases | http://www.cazy.org/GT4.html |
| gene_06610.t1 | GT4.hmm | GTs | GlycosyTransferases | http://www.cazy.org/GT4.html |
| gene_10302.t1 | GT48.hmm | GTs | GlycosyTransferases | http://www.cazy.org/GT48.html |
| gene_04734.t1 | GT50.hmm | GTs | GlycosyTransferases | http://www.cazy.org/GT50.html |
| gene_06325.t1 | GT57.hmm | GTs | GlycosyTransferases | http://www.cazy.org/GT57.html |
| gene_06952.t1 | GT57.hmm | GTs | GlycosyTransferases | http://www.cazy.org/GT57.html |
| gene_05817.t1 | GT58.hmm | GTs | GlycosyTransferases | http://www.cazy.org/GT58.html |
| gene_07000.t1 | GT59.hmm | GTs | GlycosyTransferases | http://www.cazy.org/GT59.html |
| gene_00309.t1 | GT62.hmm | GTs | GlycosyTransferases | http://www.cazy.org/GT62.html |
| gene_06218.t1 | GT62.hmm | GTs | GlycosyTransferases | http://www.cazy.org/GT62.html |
| gene_07098.t1 | GT62.hmm | GTs | GlycosyTransferases | http://www.cazy.org/GT62.html |
| gene_05978.t1 | GT66.hmm | GTs | GlycosyTransferases | http://www.cazy.org/GT66.html |
| gene_04493.t1 | GT69.hmm | GTs | GlycosyTransferases | http://www.cazy.org/GT69.html |
| gene_09836.t1 | GT69.hmm | GTs | GlycosyTransferases | http://www.cazy.org/GT69.html |
| gene_03572.t1 | GT71.hmm | GTs | GlycosyTransferases | http://www.cazy.org/GT71.html |
| gene_05724.t1 | GT71.hmm | GTs | GlycosyTransferases | http://www.cazy.org/GT71.html |
| gene_09608.t1 | GT71.hmm | GTs | GlycosyTransferases | http://www.cazy.org/GT71.html |
| gene_10092.t1 | GT76.hmm | GTs | GlycosyTransferases | http://www.cazy.org/GT76.html |
| gene_00661.t1 | GT8.hmm | GTs | GlycosyTransferases | http://www.cazy.org/GT8.html |
| gene_01969.t1 | GT8.hmm | GTs | GlycosyTransferases | http://www.cazy.org/GT8.html |
| gene_02964.t1 | GT8.hmm | GTs | GlycosyTransferases | http://www.cazy.org/GT8.html |
| gene_04805.t1 | GT8.hmm | GTs | GlycosyTransferases | http://www.cazy.org/GT8.html |
| gene_04999.t1 | GT8.hmm | GTs | GlycosyTransferases | http://www.cazy.org/GT8.html |
| gene_10658.t1 | GT8.hmm | GTs | GlycosyTransferases | http://www.cazy.org/GT8.html |
| gene_00133.t1 | GT90.hmm | GTs | GlycosyTransferases | http://www.cazy.org/GT90.html |
| gene_01031.t1 | GT90.hmm | GTs | GlycosyTransferases | http://www.cazy.org/GT90.html |

**Table S4 Detailed information of genes encoding CAZymes in the genome of *P. paneum* OM1 (*Continued*)**

| **Family** | **SeqID** | **Domain** | **Class** | **Class information** | **Domain description** |
| --- | --- | --- | --- | --- | --- |
| GTs-  Total 88 | gene_02962.t1 | GT90.hmm | GTs | GlycosyTransferases | http://www.cazy.org/GT90.html |
| gene_03298.t1 | GT90.hmm | GTs | GlycosyTransferases | http://www.cazy.org/GT90.html |
| gene_07834.t1 | GT90.hmm | GTs | GlycosyTransferases | http://www.cazy.org/GT90.html |
| gene_08383.t1 | GT90.hmm | GTs | GlycosyTransferases | http://www.cazy.org/GT90.html |
| gene_08925.t1 | GT90.hmm | GTs | GlycosyTransferases | http://www.cazy.org/GT90.html |
| gene_08941.t1 | GT90.hmm | GTs | GlycosyTransferases | http://www.cazy.org/GT90.html |
| PLs-  Total 4 | gene_08437.t1 | PL1_4.hmm | PLs | Polysaccharide Lyases | http://www.cazy.org/PL1_4.html |
| gene_00945.t1 | PL1_7.hmm | PLs | Polysaccharide Lyases | http://www.cazy.org/PL1_7.html |
| gene_02291.t1 | PL4_1.hmm | PLs | Polysaccharide Lyases | http://www.cazy.org/PL4_1.html |
| gene_06586.t1 | PL4_3.hmm | PLs | Polysaccharide Lyases | http://www.cazy.org/PL4_3.html |
