# Supplementary material for: Comparative genome analysis of patulin-producing Penicillium paneum OM1 isolated from pears
Source: PeerJ journal article supplement (doi:10.7717/peerj.19848), 2025-08-22
Supplement: SupplementaryTableS5.docx [file SupplementaryTableS5.docx]

**Table S5 Different types of SM BGCs in genomes of *P. paneum* OM1 and seven other strains**

| **Fungal strain** | **NRPS** | **PKS** | **Terpene synthase** | **NRPS-PKS hybrid** | **DMAT** | **PKS-NRPS hybrid** | **RiPPs synthase** | **Betalactone**  **synthetase** | **Total** |
| --- | --- | --- | --- | --- | --- | --- | --- | --- | --- |
| *P. expansum* ATCC 24692 | 24 | 17 | 2 | 2 | 2 | 4 | 4 | 1 | 56 |
| *P. expansum* d1 | 20 | 20 | 2 | 1 | 2 | 5 | 3 | 1 | 54 |
| *P. expansum* MD-8 | 20 | 18 | 3 | 3 | 2 | 4 | 2 | 1 | 53 |
| *P. griseofulvum* PG3 | 20 | 16 | 3 | 1 | 0 | 3 | 4 | 0 | 47 |
| *P. chrysogenum* Wisconsin 54-1255 | 18 | 12 | 3 | 2 | 1 | 2 | 0 | 2 | 40 |
| *A. clavatus* NRRL 1 | 10 | 10 | 6 | 4 | 1 | 3 | 2 | 1 | 37 |
| *P. digitatum* Pd1 | 15 | 8 | 3 | 2 | 0 | 0 | 1 | 1 | 30 |
| *P. paneum* OM1 | 9 | 11 | 3 | 1 | 0 | 3 | 1 | 2 | 30 |

**Notes.**

*P. paneum* OM1 contains three additional BGCs (2 NRPS-indole synthase hybrid and 1 isocyanide synthase gene clusters).
