# Supplementary material for: Comparative genome analysis of patulin-producing Penicillium paneum OM1 isolated from pears
Source: PeerJ journal article supplement (doi:10.7717/peerj.19848), 2025-08-22
Supplement: SupplementaryTableS6.docx [file SupplementaryTableS6.docx]

**Table S6 The size of patulin BGCs and the number of genes in the clusters from nine fungal strains**

| **Fungal strain** | **Size of patulin biosynthetic**  **gene cluster (bp)** | **Number of patulin biosynthetic gene** | **Patulin production** |
| --- | --- | --- | --- |
| *A. clavatus* NRRL 1 | 41,717 | 15 | No |
| *P. expansum* d1 | 40,120 | 15 | Yes |
| *P. expansum* NRRL 35695 | 39,821 | 15 | Yes |
| *P. expansum* ATCC 24692 | 39,801 | 15 | Yes |
| *P. expansum* MD-8 | 39,748 | 15 | No |
| *P. griseofulvum* PG3 | 39,479 | 15 | Yes |
| *P. paneum* OM1 | 39,468 | 15 | Yes |
| *P. chrysogenum* Wisconsin 54-1255 | 19,173 | 6 | No |
| *P. digitatum* Pd1 | 18,598 | 8 | No |
